# Supplementary material for: Genome-wide Identification of JAZ Family and Functional Analysis of GmJAZ6 in Response to Phosphorus Deficiency in Soybean
Source: Research Square preprint supplement (doi:10.21203/rs.3.rs-7860168/v1), 2025-10-21
Supplement: Supplementary file 1 [file 532a50509974e0b1d79f98d3.xlsx]

## Sheet: Table S1
	HP-1	HP-2	HP-3	Average	LP-1	LP-2	LP-3	Average
Total raw reads	47410260	47336758	48080912	47609310	45891620	48939450	49380518	4.80705e+07
Total clean reads	45111830	45069482	46490468	45557260	44026326	46999298	47455038	4.61602e+07
Clean reads mapped	42451799	42140109	43795564	42795824	41399985	44160983	44324830	43295266
Percentage of clean reads mapped	0.941	0.935	0.942	0.939333	0.9403	0.9396	0.934	0.938
Table S1. Statistical summary of the reads from RNA-seq

## Sheet: Table  S2
Accession No.	LP-1_count	LP-2_count	LP-3_count	baseMean	HP-1_count	HP-2_count	HP-3_count	Log2(LP/HP)	P-value	Q value	Up/Down	Significant	Position	NR:Seq-id	NR:Score	NR:Evalue	NR:Description
Glyma.01G002200.Wm82.a2.v1	436	438	537	322.939	147	162	168	1.66402	4.25146e-23	5.6752e-21	up	yes	chrChr01:303812-307964:-	gi|356496785|ref|XP_003517246.1|	1543	0	PREDICTED: methyl-CpG-binding domain-containing protein 2-like isoform X1 [Glycine max]
Glyma.01G004600.Wm82.a2.v1	24	28	29	51.1439	76	79	81	-1.21547	5.555e-06	9.29676e-05	down	yes	chrChr01:438340-439522:-	gi|571466117|ref|XP_003529073.2|	406	1e-45	PREDICTED: arabinogalactan peptide 22-like [Glycine max]
Glyma.01G005100.Wm82.a2.v1	93	11	39	33.2095	23	19	9	1.05396	0.00949171	0.0496952	up	yes	chrChr01:505665-508556:+	gi|359806962|ref|NP_001241072.1|	1677	0	uncharacterized protein LOC100794523 [Glycine max]
Glyma.01G005400.Wm82.a2.v1	1683	1893	1860	1310.46	795	693	777	1.40296	2.5784e-29	4.44794e-27	up	yes	chrChr01:524166-529281:-	gi|571433508|ref|XP_003516323.2|	2712	0	PREDICTED: 6-phosphofructokinase 3-like [Glycine max]
Glyma.01G006000.Wm82.a2.v1	138	95	33	52.653	13	15	9	2.21659	1.76283e-09	5.98988e-08	up	yes	chrChr01:585972-587305:+	gi|351735278|ref|NP_001237279.1|	802	1e-103	uncharacterized protein LOC100306340 [Glycine max]
Glyma.01G006300.Wm82.a2.v1	51	68	22	32.6373	15	28	7	1.17267	0.00227081	0.0157924	up	yes	chrChr01:600230-601509:+	.	.	.	.
Glyma.01G006700.Wm82.a2.v1	656	702	579	486.037	330	294	305	1.19401	3.27563e-16	2.67449e-14	up	yes	chrChr01:652561-658525:-	gi|571433534|ref|XP_006572934.1|	3638	0	PREDICTED: probable glutamate carboxypeptidase 2-like isoform X1 [Glycine max]
Glyma.01G010500.Wm82.a2.v1	185	352	128	162.671	96	75	122	1.15941	8.82446e-05	0.00106818	up	yes	chrChr01:1018533-1021955:+	gi|351721361|ref|NP_001235671.1|	4685	0	NBS-LRR type disease resistance protein [Glycine max]
Glyma.01G014000.Wm82.a2.v1	136	231	99	106.024	49	60	45	1.5325	8.38978e-08	2.06153e-06	up	yes	chrChr01:1337737-1342734:-	gi|356497633|ref|XP_003517664.1|	5581	0	PREDICTED: cellulose synthase-like protein D2-like isoform X1 [Glycine max]
Glyma.01G016800.Wm82.a2.v1	694	763	822	500.041	155	254	223	1.91051	1.32106e-23	1.81385e-21	up	yes	chrChr01:1609124-1612598:+	gi|356496342|ref|XP_003517027.1|	1323	6e-178	PREDICTED: uncharacterized membrane protein At4g09580-like [Glycine max]
Glyma.01G018100.Wm82.a2.v1	7	9	1	17.0663	28	34	28	-1.48387	0.000171181	0.00186174	down	yes	chrChr01:1745243-1746141:+	.	.	.	.
Glyma.01G020000.Wm82.a2.v1	230	224	231	165.232	108	83	95	1.35984	2.34409e-13	1.42849e-11	up	yes	chrChr01:1990783-1994783:+	gi|734324076|gb|KHN04895.1|	3464	0	ABC transporter G family member 17 [Glycine soja]
Glyma.01G024500.Wm82.a2.v1	45	39	13	23.166	15	8	16	1.04203	0.00695138	0.0387276	up	yes	chrChr01:2502596-2504339:+	gi|571433812|ref|XP_006573018.1|	1267	8e-170	PREDICTED: uncharacterized protein LOC102668650 [Glycine max]
Glyma.01G030300.Wm82.a2.v1	406	332	203	202.336	121	73	41	1.85555	5.60428e-10	2.09702e-08	up	yes	chrChr01:3178070-3179538:+	gi|356497749|ref|XP_003517721.1|	971	2e-126	PREDICTED: protein bfr2-like [Glycine max]
Glyma.01G031300.Wm82.a2.v1	34	30	30	58.9756	119	78	75	-1.19172	1.66306e-05	0.00024692	down	yes	chrChr01:3257841-3260562:+	gi|356497761|ref|XP_003517727.1|	2956	0	PREDICTED: uncharacterized protein LOC100808883 [Glycine max]
Glyma.01G032000.Wm82.a2.v1	263	322	227	441.414	668	597	646	-1.02101	5.83176e-10	2.17489e-08	down	yes	chrChr01:3363639-3366996:+	gi|571433925|ref|XP_006573048.1|	2366	0	PREDICTED: uncharacterized protein LOC100799483 [Glycine max]
Glyma.01G036800.Wm82.a2.v1	137	160	149	101.382	29	76	41	1.54773	4.63882e-08	1.20965e-06	up	yes	chrChr01:3916138-3918004:-	gi|356497798|ref|XP_003517744.1|	1940	0	PREDICTED: myosin heavy chain kinase B-like [Glycine max]
Glyma.01G040600.Wm82.a2.v1	116	108	49	60.878	29	28	25	1.59248	3.43476e-07	7.55176e-06	up	yes	chrChr01:4389420-4392033:+	gi|356498138|ref|XP_003517910.1|	1455	0	PREDICTED: dnaJ homolog subfamily A member 1-like [Glycine max]
Glyma.01G040900.Wm82.a2.v1	286	237	265	199.176	138	99	150	1.12841	1.3923e-08	3.99622e-07	up	yes	chrChr01:4396965-4402461:-	gi|734313059|gb|KHN01159.1|	4426	0	Putative pre-mRNA-splicing factor ATP-dependent RNA helicase DHX16 [Glycine soja]
Glyma.01G041200.Wm82.a2.v1	77	68	48	133.474	293	193	152	-1.38152	1.44956e-07	3.41199e-06	down	yes	chrChr01:4420529-4421978:-	gi|351734488|ref|NP_001236052.1|	569	6e-71	uncharacterized protein LOC100527691 [Glycine max]
Glyma.01G043600.Wm82.a2.v1	30	44	36	25.7527	17	17	7	1.2321	0.000477313	0.00438938	up	yes	chrChr01:4751167-4754842:+	gi|351727098|ref|NP_001236381.1|	806	9e-105	uncharacterized protein LOC100500581 [Glycine max]
Glyma.01G045200.Wm82.a2.v1	108	54	87	62.1617	43	43	31	1.08742	0.000195458	0.0020807	up	yes	chrChr01:5106053-5107135:+	gi|356498230|ref|XP_003517956.1|	920	1e-121	PREDICTED: uncharacterized protein LOC100819761 [Glycine max]
Glyma.01G046100.Wm82.a2.v1	26	24	17	14.7682	7	10	2	1.30037	0.00112817	0.00894004	up	yes	chrChr01:5324168-5326096:-	gi|502093740|ref|XP_004490037.1|	611	9e-106	PREDICTED: cullin-3A-like [Cicer arietinum]
Glyma.01G048400.Wm82.a2.v1	1755	2538	2737	1364.09	208	337	269	3.06685	1.85734e-49	6.1254e-47	up	yes	chrChr01:5627602-5631187:+	gi|356498298|ref|XP_003517990.1|	1211	4e-165	PREDICTED: ribonuclease 3-like [Glycine max]
Glyma.01G083300.Wm82.a2.v1	244	243	248	133.611	3	9	15	4.25154	1.97214e-52	7.45403e-50	up	yes	chrChr01:24263040-24269044:-	gi|356495954|ref|XP_003516835.1|	1498	0	PREDICTED: endonuclease 2-like [Glycine max]
Glyma.01G086000.Wm82.a2.v1	74	59	63	108.718	152	119	204	-1.00251	4.11697e-05	0.000555296	down	yes	chrChr01:25495742-25504243:-	gi|356495972|ref|XP_003516844.1|	2316	0	PREDICTED: ribosome biogenesis protein WDR12 homolog isoform X1 [Glycine max]
Glyma.01G086700.Wm82.a2.v1	6213	6338	7175	4492.11	2090	2655	1777	1.6973	6.63803e-25	9.50198e-23	up	yes	chrChr01:25842302-25844918:-	gi|356495976|ref|XP_003516846.1|	1534	0	PREDICTED: probable transcription factor GLK2-like [Glycine max]
Glyma.01G087900.Wm82.a2.v1	67	61	35	40.2687	20	19	35	1.06606	0.0011789	0.00925703	up	yes	chrChr01:26648109-26654378:+	gi|356495992|ref|XP_003516854.1|	3053	0	PREDICTED: serine/threonine-protein kinase STN7, chloroplastic-like [Glycine max]
Glyma.01G089300.Wm82.a2.v1	24	18	14	12.3766	2	9	5	1.22317	0.00271514	0.0182487	up	yes	chrChr01:27014318-27023785:-	gi|571434710|ref|XP_006573276.1|	4229	0	PREDICTED: protein CHUP1, chloroplastic-like [Glycine max]
Glyma.01G096000.Wm82.a2.v1	1189	990	777	694.317	403	430	279	1.48535	2.56559e-13	1.55502e-11	up	yes	chrChr01:30431180-30433742:-	gi|356526711|ref|XP_003531960.1|	1042	3e-136	PREDICTED: uncharacterized protein LOC100784644 [Glycine max]
Glyma.01G112700.Wm82.a2.v1	24	40	29	62.1343	115	122	56	-1.24357	6.30256e-05	0.000801254	down	yes	chrChr01:38401762-38404642:+	gi|356494943|ref|XP_003516340.1|	1647	0	PREDICTED: transcription factor DIVARICATA-like isoform X1 [Glycine max]
Glyma.01G113000.Wm82.a2.v1	6872	6841	8259	4062.88	477	435	339	4.15119	5.40691e-153	1.21255e-149	up	yes	chrChr01:38674554-38679976:-	gi|356496170|ref|XP_003516943.1|	2726	0	PREDICTED: uncharacterized protein LOC100780899 [Glycine max]
Glyma.01G124700.Wm82.a2.v1	715	970	1146	731.734	440	668	385	1.00967	5.99852e-06	9.96958e-05	up	yes	chrChr01:43008183-43010029:+	gi|356495047|ref|XP_003516392.1|	890	5e-113	PREDICTED: abscisic acid receptor PYL4-like [Glycine max]
Glyma.01G125800.Wm82.a2.v1	51	59	52	104.995	191	142	157	-1.31792	2.68415e-09	8.86084e-08	down	yes	chrChr01:43453101-43457022:-	gi|356495063|ref|XP_003516400.1|	3642	0	PREDICTED: probably inactive leucine-rich repeat receptor-like protein kinase IMK2-like [Glycine max]
Glyma.01G131500.Wm82.a2.v1	801	874	1122	730.039	538	510	474	1.00956	4.63757e-10	1.75284e-08	up	yes	chrChr01:44789012-44792912:+	gi|356496299|ref|XP_003517006.1|	2489	0	PREDICTED: CBL-interacting protein kinase 2-like [Glycine max]
Glyma.01G135500.Wm82.a2.v1	3901	3661	3765	2014.18	47	43	39	6.35218	0	0	up	yes	chrChr01:45776779-45781199:+	gi|356496328|ref|XP_003517020.1|	1184	7e-158	PREDICTED: SPX domain-containing protein 3-like [Glycine max]
Glyma.01G148700.Wm82.a2.v1	249	241	273	427.314	453	516	904	-1.03215	9.34444e-06	0.000149046	down	yes	chrChr01:48578085-48579881:-	gi|571435407|ref|XP_006573472.1|	1858	0	PREDICTED: histone-lysine N-methyltransferase ASHR2-like [Glycine max]
Glyma.01G160300.Wm82.a2.v1	64	74	67	124.786	212	186	170	-1.21713	2.51148e-09	8.34057e-08	down	yes	chrChr01:49878554-49885072:+	gi|571435616|ref|XP_006573534.1|	4327	0	PREDICTED: putative DNA (cytosine-5)-methyltransferase CMT1-like [Glycine max]
Glyma.01G161200.Wm82.a2.v1	394	377	401	265.788	117	178	85	1.65055	6.49386e-13	3.72776e-11	up	yes	chrChr01:49945683-49947759:-	gi|734411600|gb|KHN35986.1|	1001	5e-133	Protein GDAP2 like [Glycine soja]
Glyma.01G161600.Wm82.a2.v1	2004	2226	2537	1761.18	1257	1293	1099	1.03202	2.25796e-13	1.3785e-11	up	yes	chrChr01:49966465-49975218:-	gi|356496589|ref|XP_003517149.1|	3090	0	PREDICTED: probable serine/threonine-protein kinase DDB_G0267514-like [Glycine max]
Glyma.01G162500.Wm82.a2.v1	226	326	305	474.077	789	734	547	-1.04093	5.54986e-08	1.41755e-06	down	yes	chrChr01:50046261-50049289:+	gi|351724045|ref|NP_001236532.1|	737	2e-94	uncharacterized protein LOC100527729 [Glycine max]
Glyma.01G166100.Wm82.a2.v1	1012	1380	535	688.965	449	362	304	1.40015	6.59726e-08	1.65e-06	up	yes	chrChr01:50366875-50372430:-	gi|571435690|ref|XP_006573556.1|	2795	0	PREDICTED: calcium-dependent protein kinase 16-like [Glycine max]
Glyma.01G168400.Wm82.a2.v1	144	108	103	88.7385	23	85	59	1.03421	0.00129408	0.00998204	up	yes	chrChr01:50605679-50608020:+	gi|351725609|ref|NP_001238378.1|	939	6e-125	uncharacterized protein LOC100499688 [Glycine max]
Glyma.01G173300.Wm82.a2.v1	508	582	550	388.311	212	209	217	1.48627	2.15499e-24	3.03313e-22	up	yes	chrChr01:51040569-51044168:-	gi|356496743|ref|XP_003517225.1|	1667	0	PREDICTED: putative glucose-6-phosphate 1-epimerase-like [Glycine max]
Glyma.01G174000.Wm82.a2.v1	74	116	72	146.098	206	196	238	-1.03334	3.68168e-06	6.401e-05	down	yes	chrChr01:51095632-51101526:+	gi|356495406|ref|XP_003516569.1|	2787	0	PREDICTED: ATPase family AAA domain-containing protein 3-B-like [Glycine max]
Glyma.01G175200.Wm82.a2.v1	101	93	73	64.2745	15	56	39	1.17812	0.000324897	0.00318186	up	yes	chrChr01:51171930-51176589:+	gi|356496755|ref|XP_003517231.1|	1924	0	PREDICTED: uncharacterized protein LOC100801441 [Glycine max]
Glyma.01G175300.Wm82.a2.v1	43	35	19	70.466	134	99	109	-1.43273	3.75412e-07	8.18438e-06	down	yes	chrChr01:51183060-51189498:+	gi|571435803|ref|XP_006573583.1|	4002	0	PREDICTED: ATP-dependent DNA helicase DDM1-like [Glycine max]
Glyma.01G177500.Wm82.a2.v1	120	134	152	87.7019	39	42	23	1.91609	6.72692e-14	4.36005e-12	up	yes	chrChr01:51388319-51390686:-	gi|356496783|ref|XP_003517245.1|	993	1e-132	PREDICTED: homeobox-leucine zipper protein ATHB-40-like [Glycine max]
Glyma.01G178800.Wm82.a2.v1	598	636	663	334.971	1	2	4	6.49631	1.71301e-105	1.60067e-102	up	yes	chrChr01:51487134-51492837:-	gi|356496804|ref|XP_003517255.1|	1956	0	PREDICTED: lysosomal amino acid transporter 1-like [Glycine max]
Glyma.01G183300.Wm82.a2.v1	471	681	426	408.952	304	283	254	1.01841	1.70215e-07	3.96804e-06	up	yes	chrChr01:51854823-51858498:+	gi|571435938|ref|XP_006573620.1|	4220	0	PREDICTED: probable disease resistance protein At5g66900-like isoform X3 [Glycine max]
Glyma.01G185400.Wm82.a2.v1	134	194	109	110.944	69	71	78	1.06543	1.31819e-05	0.000201857	up	yes	chrChr01:52082706-52084812:+	gi|351726108|ref|NP_001238139.1|	860	3e-110	cyclin-dependent kinase inhibitor 1;2 [Glycine max]
Glyma.01G186500.Wm82.a2.v1	8	6	2	13.9242	21	26	24	-1.30048	0.00107066	0.00858746	down	yes	chrChr01:52183666-52184570:+	gi|571435989|ref|XP_006573637.1|	868	3e-115	PREDICTED: uncharacterized protein LOC102666883 [Glycine max]
Glyma.01G187400.Wm82.a2.v1	99	83	80	157.98	292	172	253	-1.17774	2.1469e-07	4.91288e-06	down	yes	chrChr01:52250433-52263914:+	gi|571435997|ref|XP_006573639.1|	7878	0	PREDICTED: DNA polymerase alpha catalytic subunit-like [Glycine max]
Glyma.01G191900.Wm82.a2.v1	888	1043	1019	572.961	132	92	121	3.13226	3.04203e-77	2.00649e-74	up	yes	chrChr01:52637976-52641839:-	gi|356496959|ref|XP_003517332.1|	1379	0	PREDICTED: acyl-CoA-binding domain-containing protein 3-like isoform X1 [Glycine max]
Glyma.01G193600.Wm82.a2.v1	3891	4661	2965	2616.27	1632	1245	902	1.66007	5.88397e-15	4.2113e-13	up	yes	chrChr01:52814304-52820173:-	gi|734411911|gb|KHN36297.1|	5253	0	Calcium-transporting ATPase 2, plasma membrane-type [Glycine soja]
Glyma.01G194900.Wm82.a2.v1	1972	2330	2156	1321.25	355	411	416	2.54808	8.02569e-76	4.821e-73	up	yes	chrChr01:52912375-52915664:+	gi|734411923|gb|KHN36309.1|	2028	0	ADIPOR-like receptor CG5315-like protein [Glycine soja]
Glyma.01G197900.Wm82.a2.v1	77	89	70	51.6414	40	19	6	1.54738	1.65162e-05	0.000245924	up	yes	chrChr01:53190137-53192717:-	gi|571436157|ref|XP_006573684.1|	1744	0	PREDICTED: transcription factor bHLH25-like [Glycine max]
Glyma.01G199800.Wm82.a2.v1	79	53	77	52.109	36	23	39	1.09292	0.000164258	0.00180218	up	yes	chrChr01:53351626-53353972:-	gi|356495547|ref|XP_003516638.1|	1780	0	PREDICTED: beta-amyrin 11-oxidase-like [Glycine max]
Glyma.01G200400.Wm82.a2.v1	112	39	64	50.5932	23	34	24	1.26356	0.000181085	0.00195304	up	yes	chrChr01:53401726-53403810:-	gi|356495553|ref|XP_003516641.1|	1768	0	PREDICTED: peroxidase 20-like [Glycine max]
Glyma.01G202000.Wm82.a2.v1	1134	1022	1054	677.273	267	229	222	2.26513	3.29785e-57	1.45969e-54	up	yes	chrChr01:53495131-53498288:-	gi|359806366|ref|NP_001240977.1|	1249	2e-169	uncharacterized protein LOC100793483 [Glycine max]
Glyma.01G203400.Wm82.a2.v1	590	530	322	337.701	238	196	103	1.41688	1.29102e-07	3.06987e-06	up	yes	chrChr01:53662610-53665746:+	gi|571436239|ref|XP_006573703.1|	2843	0	PREDICTED: beta-amylase 3, chloroplastic-like [Glycine max]
Glyma.01G203500.Wm82.a2.v1	162	319	152	158.619	114	117	72	1.08014	0.000104735	0.00123664	up	yes	chrChr01:53667259-53670201:-	gi|351721075|ref|NP_001238477.1|	1870	0	NAK-type protein kinase [Glycine max]
Glyma.01G205900.Wm82.a2.v1	651	520	556	353.238	153	110	52	2.34073	6.73759e-19	6.88893e-17	up	yes	chrChr01:53825998-53827692:-	gi|356497107|ref|XP_003517405.1|	2752	0	PREDICTED: phospholipase A1-Ibeta2, chloroplastic-like [Glycine max]
Glyma.01G206500.Wm82.a2.v1	40	20	21	18.1925	7	12	6	1.29987	0.000762889	0.0064887	up	yes	chrChr01:53866538-53869493:-	gi|356495581|ref|XP_003516653.1|	3905	0	PREDICTED: G-type lectin S-receptor-like serine/threonine-protein kinase RLK1-like [Glycine max]
Glyma.01G206600.Wm82.a2.v1	494	340	226	233.734	180	87	35	1.17994	0.00440499	0.0269957	up	yes	chrChr01:53876805-53878322:-	gi|571487156|ref|XP_003538752.2|	1084	7e-143	PREDICTED: ethylene-responsive transcription factor 1A-like [Glycine max]
Glyma.01G209500.Wm82.a2.v1	59	48	84	107.685	171	165	138	-1.0385	1.46025e-05	0.000221666	down	yes	chrChr01:54105335-54109214:-	gi|356497141|ref|XP_003517421.1|	1832	0	PREDICTED: probable pectinesterase 68 [Glycine max]
Glyma.01G210400.Wm82.a2.v1	236	130	306	164.442	74	143	77	1.16721	7.92947e-05	0.000973502	up	yes	chrChr01:54170359-54172571:+	gi|356497151|ref|XP_003517426.1|	1767	0	PREDICTED: L-lactate dehydrogenase A-like [Glycine max]
Glyma.01G211500.Wm82.a2.v1	268	275	197	152.309	39	46	56	2.35944	2.86971e-25	4.2526e-23	up	yes	chrChr01:54292771-54295324:+	gi|356495619|ref|XP_003516672.1|	1430	0	PREDICTED: protein ODORANT1 [Glycine max]
Glyma.01G212100.Wm82.a2.v1	68	66	63	46.9149	13	38	27	1.24774	8.30617e-05	0.0010142	up	yes	chrChr01:54366072-54367448:+	gi|356497169|ref|XP_003517435.1|	1140	8e-153	PREDICTED: uncharacterized protein LOC100778228 [Glycine max]
Glyma.01G216000.Wm82.a2.v1	26	38	6	13.5713	0	5	3	1.57854	0.0001864	0.0020001	up	yes	chrChr01:54666766-54676069:-	gi|356497210|ref|XP_003517455.1|	924	9e-110	PREDICTED: dehydration-responsive element-binding protein 1F isoform 1 [Glycine max]
Glyma.01G216600.Wm82.a2.v1	157	219	278	133.63	48	39	32	2.36106	1.78978e-20	2.06895e-18	up	yes	chrChr01:54702983-54704976:+	gi|356495653|ref|XP_003516689.1|	2745	0	PREDICTED: MATE efflux family protein 6-like [Glycine max]
Glyma.01G216700.Wm82.a2.v1	20	56	29	25.1665	16	16	11	1.07777	0.00356142	0.0227415	up	yes	chrChr01:54706632-54707163:+	.	.	.	.
Glyma.01G218000.Wm82.a2.v1	26	22	28	17.9289	6	15	8	1.12538	0.00282725	0.0188665	up	yes	chrChr01:54802697-54805432:-	gi|356495663|ref|XP_003516694.1|	909	7e-121	PREDICTED: remorin-like isoform X1 [Glycine max]
Glyma.01G219400.Wm82.a2.v1	396	196	167	164.788	58	84	56	1.81986	3.72589e-10	1.4324e-08	up	yes	chrChr01:54898589-54899940:+	gi|351727154|ref|NP_001236895.1|	883	1e-117	uncharacterized protein LOC100306570 [Glycine max]
Glyma.01G224000.Wm82.a2.v1	5	9	2	12.0417	16	19	24	-1.06907	0.00864102	0.0461903	down	yes	chrChr01:55268994-55272482:+	gi|571436561|ref|XP_003516715.2|	3392	0	PREDICTED: probable inactive receptor kinase At4g23740-like [Glycine max]
Glyma.01G224800.Wm82.a2.v1	333	592	487	350.616	114	362	176	1.08776	0.000307661	0.00304484	up	yes	chrChr01:55350106-55351996:-	gi|571436575|ref|XP_006573805.1|	1666	0	PREDICTED: probable WRKY transcription factor 53 [Glycine max]
Glyma.01G229200.Wm82.a2.v1	50	57	37	34.41	16	16	26	1.21869	0.000155704	0.00172521	up	yes	chrChr01:55696573-55709367:+	gi|571436649|ref|XP_006573827.1|	4304	0	PREDICTED: uncharacterized protein LOC100795418 isoform X1 [Glycine max]
Glyma.01G229600.Wm82.a2.v1	24	20	25	48.5075	98	72	63	-1.36339	2.65874e-06	4.81881e-05	down	yes	chrChr01:55732616-55735506:+	gi|356497369|ref|XP_003517533.1|	2274	0	PREDICTED: cell division cycle 20.1, cofactor of APC complex [Glycine max]
Glyma.01G230200.Wm82.a2.v1	12560	12154	13371	8169.71	2805	3861	2701	2.111	2.59677e-39	6.37612e-37	up	yes	chrChr01:55772244-55776690:+	gi|359807049|ref|NP_001241595.1|	527	2e-63	uncharacterized protein LOC100786423 [Glycine max]
Glyma.01G233400.Wm82.a2.v1	35	17	25	16.7098	4	12	4	1.38663	0.000501706	0.00457121	up	yes	chrChr01:55974989-55977220:+	gi|571436731|ref|XP_006573852.1|	1588	0	PREDICTED: transcription factor MYB39-like [Glycine max]
Glyma.01G234800.Wm82.a2.v1	49	54	67	43.1783	35	22	28	1.00903	0.000564123	0.00506311	up	yes	chrChr01:56087656-56089488:+	gi|356497429|ref|XP_003517563.1|	619	6e-78	PREDICTED: uncharacterized protein At2g34160-like [Glycine max]
Glyma.01G236200.Wm82.a2.v1	18	22	13	10.419	3	3	1	1.72514	3.20065e-05	0.000445825	up	yes	chrChr01:56161681-56162756:+	gi|571436792|ref|XP_006573875.1|	670	1e-85	PREDICTED: uncharacterized protein LOC102664619 [Glycine max]
Glyma.01G236500.Wm82.a2.v1	253	346	335	184.656	38	54	38	2.7843	8.35038e-36	1.84802e-33	up	yes	chrChr01:56194029-56194868:+	gi|351721615|ref|NP_001237983.1|	869	4e-115	uncharacterized protein LOC100527055 [Glycine max]
Glyma.02G000400.Wm82.a2.v1	1258	1146	987	858.609	576	573	525	1.15476	1.10623e-15	8.52204e-14	up	yes	chrChr02:40099-44249:+	gi|356499893|ref|XP_003518770.1|	2977	0	PREDICTED: lysM domain receptor-like kinase 4-like [Glycine max]
Glyma.02G001500.Wm82.a2.v1	104	22	40	36.6523	10	10	27	1.33014	0.000795705	0.0067135	up	yes	chrChr02:175310-178604:+	gi|356500378|ref|XP_003519009.1|	2801	0	PREDICTED: 3-ketoacyl-CoA synthase 11-like [Glycine max]
Glyma.02G005800.Wm82.a2.v1	6	21	7	6.60235	0	4	0	1.15127	0.0055245	0.0323761	up	yes	chrChr02:634487-639201:-	gi|359807624|ref|NP_001241164.1|	2473	0	probable inorganic phosphate transporter 1-7-like [Glycine max]
Glyma.02G009500.Wm82.a2.v1	53	30	18	61.0366	116	93	68	-1.05443	0.00104882	0.00845468	down	yes	chrChr02:932321-933067:+	gi|351723047|ref|NP_001237265.1|	377	3e-42	uncharacterized protein LOC100306595 [Glycine max]
Glyma.02G016400.Wm82.a2.v1	1	1	1	5.5373	9	14	9	-1.31783	0.00178507	0.0129777	down	yes	chrChr02:1466563-1469437:-	gi|356500307|ref|XP_003518974.1|	2557	0	PREDICTED: endoglucanase 17 [Glycine max]
Glyma.02G021400.Wm82.a2.v1	183	450	272	221.765	176	129	97	1.1735	2.80323e-05	0.000396543	up	yes	chrChr02:1900379-1903175:-	gi|356500513|ref|XP_003519076.1|	1520	0	PREDICTED: hypersensitive-induced response protein 2 isoform X1 [Glycine max]
Glyma.02G023500.Wm82.a2.v1	536	516	336	331.668	212	200	147	1.38198	1.1159e-10	4.64002e-09	up	yes	chrChr02:2120957-2123333:-	gi|356500637|ref|XP_003519138.1|	1446	0	PREDICTED: dnaJ homolog subfamily B member 13-like [Glycine max]
Glyma.02G024200.Wm82.a2.v1	551	742	399	408.721	211	265	234	1.32198	1.03523e-09	3.65416e-08	up	yes	chrChr02:2152655-2160738:-	gi|571438421|ref|XP_006574563.1|	2557	0	PREDICTED: uncharacterized protein LOC100797561 [Glycine max]
Glyma.02G029200.Wm82.a2.v1	98	137	119	79.3546	27	55	27	1.62061	1.33883e-08	3.87248e-07	up	yes	chrChr02:2660823-2662537:+	gi|356501979|ref|XP_003519800.1|	2003	0	PREDICTED: dynein assembly factor with WDR repeat domains 1-like [Glycine max]
Glyma.02G033500.Wm82.a2.v1	1078	1070	1175	859.314	627	631	498	1.05906	2.40255e-13	1.45883e-11	up	yes	chrChr02:3098851-3104217:-	gi|356501787|ref|XP_003519705.1|	4518	0	PREDICTED: probable alpha,alpha-trehalose-phosphate synthase [UDP-forming] 9 [Glycine max]
Glyma.02G034400.Wm82.a2.v1	30	11	18	11.0317	0	1	3	1.93321	4.37209e-06	7.477e-05	up	yes	chrChr02:3181390-3188282:-	gi|571438593|ref|XP_006574618.1|	2440	0	PREDICTED: deoxynucleoside triphosphate triphosphohydrolase SAMHD1 homolog isoform X1 [Glycine max]
Glyma.02G034500.Wm82.a2.v1	11	10	28	30.6187	60	38	43	-1.03353	0.00380201	0.0239817	down	yes	chrChr02:3193127-3195921:-	gi|356502018|ref|XP_003519819.1|	2878	0	PREDICTED: uncharacterized protein LOC100797400 [Glycine max]
Glyma.02G035200.Wm82.a2.v1	808	853	563	512.81	301	284	192	1.57915	3.84737e-14	2.56803e-12	up	yes	chrChr02:3264240-3265610:-	gi|356502255|ref|XP_003519935.1|	915	2e-118	PREDICTED: uncharacterized protein LOC100776669 [Glycine max]
Glyma.02G037100.Wm82.a2.v1	671	794	604	530.01	393	395	274	1.07773	3.94689e-09	1.25967e-07	up	yes	chrChr02:3446096-3451464:-	gi|571437782|ref|XP_006574321.1|	3181	0	PREDICTED: protein kinase family protein isoform X1 [Glycine max]
Glyma.02G037200.Wm82.a2.v1	52	44	42	24.7619	3	0	0	3.28579	5.81561e-17	5.07116e-15	up	yes	chrChr02:3453573-3457418:-	gi|356502033|ref|XP_003519826.1|	3339	0	PREDICTED: cysteine-rich receptor-like protein kinase 3-like [Glycine max]
Glyma.02G039900.Wm82.a2.v1	8	7	21	6.65267	0	2	0	1.5133	0.000308815	0.00305446	up	yes	chrChr02:3740500-3749519:+	gi|571438664|ref|XP_006574635.1|	2073	0	PREDICTED: uncharacterized protein LOC100807505 isoform X1 [Glycine max]
Glyma.02G040800.Wm82.a2.v1	9	24	7	8.27329	4	2	2	1.2324	0.00352883	0.0225806	up	yes	chrChr02:3835176-3836030:-	gi|571438682|ref|XP_006574642.1|	574	1e-73	PREDICTED: uncharacterized protein LOC102662686 [Glycine max]
Glyma.02G042300.Wm82.a2.v1	292	379	466	262.861	152	161	89	1.52771	1.06033e-10	4.43639e-09	up	yes	chrChr02:3980929-3984283:-	gi|356502075|ref|XP_003519847.1|	1936	0	PREDICTED: protein YLS2-like [Glycine max]
Glyma.02G042700.Wm82.a2.v1	41	43	12	22.3701	10	10	15	1.12908	0.00360785	0.0229509	up	yes	chrChr02:4007239-4008338:-	gi|356502482|ref|XP_003520048.1|	1262	1e-171	PREDICTED: uncharacterized protein LOC100811784 [Glycine max]
Glyma.02G043200.Wm82.a2.v1	27	28	55	73.3827	135	112	99	-1.2878	5.64652e-06	9.43584e-05	down	yes	chrChr02:4036980-4040318:+	gi|356502079|ref|XP_003519849.1|	1984	0	PREDICTED: IST1-like protein-like [Glycine max]
Glyma.02G046200.Wm82.a2.v1	44	23	25	67.2534	130	96	101	-1.44273	3.00995e-07	6.71615e-06	down	yes	chrChr02:4249191-4251536:-	gi|356502717|ref|XP_003520163.1|	2473	0	PREDICTED: uncharacterized protein LOC100803414 [Glycine max]
Glyma.02G047800.Wm82.a2.v1	538	589	590	937.296	1283	1448	1331	-1.04583	6.30118e-16	4.95246e-14	down	yes	chrChr02:4396176-4398689:-	gi|356559288|ref|XP_003547932.1|	1215	1e-163	PREDICTED: 40S ribosomal protein S4-1 [Glycine max]
Glyma.02G048700.Wm82.a2.v1	40	46	44	100.976	186	169	145	-1.63479	3.43466e-13	2.04855e-11	down	yes	chrChr02:4456124-4457800:+	gi|356502910|ref|XP_003520257.1|	1555	0	PREDICTED: putative DNA helicase INO80-like [Glycine max]
Glyma.02G050800.Wm82.a2.v1	10	12	9	6.39865	0	3	3	1.16634	0.00579604	0.033701	up	yes	chrChr02:4609996-4610621:-	.	.	.	.
Glyma.02G051400.Wm82.a2.v1	223	199	173	148.406	79	101	99	1.1846	6.79659e-09	2.07171e-07	up	yes	chrChr02:4655449-4659823:-	gi|356502144|ref|XP_003519881.1|	2788	0	PREDICTED: uncharacterized protein LOC100788061 isoform X1 [Glycine max]
Glyma.02G053100.Wm82.a2.v1	33	22	21	15.7354	4	5	6	1.70234	1.2406e-05	0.000192227	up	yes	chrChr02:4858378-4862357:+	gi|571438859|ref|XP_006574695.1|	1761	0	PREDICTED: transcription factor bHLH111-like isoform X2 [Glycine max]
Glyma.02G055900.Wm82.a2.v1	6	4	8	13.1667	22	18	24	-1.11676	0.00454254	0.0276323	down	yes	chrChr02:5029415-5033272:+	gi|734312357|gb|KHN00535.1|	389	6e-42	hypothetical protein glysoja_000203 [Glycine soja]
Glyma.02G059200.Wm82.a2.v1	77	73	139	67.6043	35	44	28	1.37049	4.06981e-06	7.00995e-05	up	yes	chrChr02:5329377-5334743:+	gi|356498422|ref|XP_003518051.1|	1627	0	PREDICTED: uncharacterized protein LOC100785566 isoform 1 [Glycine max]
Glyma.02G063600.Wm82.a2.v1	51	79	53	42.2382	7	34	23	1.28184	0.000346583	0.00335309	up	yes	chrChr02:5705744-5710339:-	gi|356498541|ref|XP_003518109.1|	1396	0	PREDICTED: salicylic acid-binding protein 2-like [Glycine max]
Glyma.02G064100.Wm82.a2.v1	3963	3507	4153	2959.21	1546	2851	1431	1.07467	1.90416e-06	3.57645e-05	up	yes	chrChr02:5741318-5742800:+	gi|356498555|ref|XP_003518116.1|	1223	7e-168	PREDICTED: ribonuclease S-2-like [Glycine max]
Glyma.02G064200.Wm82.a2.v1	379	272	361	239.946	157	164	74	1.37536	6.63274e-08	1.65641e-06	up	yes	chrChr02:5745915-5749251:+	gi|571438995|ref|XP_003519927.2|	1165	2e-159	PREDICTED: ribonuclease 1-like [Glycine max]
Glyma.02G076500.Wm82.a2.v1	1480	1688	1748	1215.74	713	874	655	1.2586	2.34885e-16	1.95094e-14	up	yes	chrChr02:6664959-6667971:-	gi|356499161|ref|XP_003518411.1|	1850	0	PREDICTED: uncharacterized oxidoreductase At4g09670-like [Glycine max]
Glyma.02G092300.Wm82.a2.v1	227	301	316	159.129	19	27	22	3.44842	3.36716e-46	9.76448e-44	up	yes	chrChr02:8175730-8176545:+	gi|356499646|ref|XP_003518648.1|	703	8e-91	PREDICTED: uncharacterized protein LOC100782908 [Glycine max]
Glyma.02G095000.Wm82.a2.v1	118	112	115	196.377	275	251	342	-1.09776	6.81697e-09	2.07526e-07	down	yes	chrChr02:8518722-8524590:-	gi|351727270|ref|NP_001236899.1|	708	5e-91	uncharacterized protein LOC100527754 [Glycine max]
Glyma.02G095600.Wm82.a2.v1	2	0	4	7.91465	22	13	9	-1.26162	0.0028439	0.0189513	down	yes	chrChr02:8598036-8600822:-	gi|356499679|ref|XP_003518664.1|	1621	0	PREDICTED: histone-lysine N-methyltransferase ATXR6-like [Glycine max]
Glyma.02G098800.Wm82.a2.v1	5361	5406	4982	3135.94	945	819	566	2.79649	8.33452e-57	3.6411e-54	up	yes	chrChr02:9169020-9171899:-	gi|356499709|ref|XP_003518679.1|	1706	0	PREDICTED: transcription factor LUX-like [Glycine max]
Glyma.02G100000.Wm82.a2.v1	63	25	37	28.7592	13	11	19	1.29415	0.000344031	0.00333495	up	yes	chrChr02:9418107-9423906:+	gi|356502478|ref|XP_003520046.1|	3002	0	PREDICTED: serine/threonine-protein kinase STN7, chloroplastic-like [Glycine max]
Glyma.02G100300.Wm82.a2.v1	80	111	53	57.5723	43	21	30	1.29269	3.75615e-05	0.000512797	up	yes	chrChr02:9449378-9454175:-	gi|351725961|ref|NP_001238646.1|	3778	0	stress-induced receptor-like kinase precursor [Glycine max]
Glyma.02G104600.Wm82.a2.v1	1622	1318	1894	3122.57	3938	2642	7957	-1.04671	0.00475997	0.0287263	down	yes	chrChr02:9939729-9941617:+	gi|356499771|ref|XP_003518710.1|	2517	0	PREDICTED: UDP-glucosyl transferase 73B2-like [Glycine max]
Glyma.02G106200.Wm82.a2.v1	28	16	28	16.7526	6	7	13	1.14657	0.00296146	0.0195526	up	yes	chrChr02:10128961-10130075:-	gi|356502531|ref|XP_003520072.1|	1062	4e-143	PREDICTED: probable membrane-associated kinase regulator 6-like [Glycine max]
Glyma.02G106300.Wm82.a2.v1	652	916	959	604.937	278	382	365	1.39124	3.52939e-13	2.10133e-11	up	yes	chrChr02:10139650-10142680:+	gi|356502533|ref|XP_003520073.1|	2374	0	PREDICTED: delta(8)-fatty-acid desaturase-like [Glycine max]
Glyma.02G106500.Wm82.a2.v1	62	53	59	38.7842	11	22	19	1.59673	3.0053e-07	6.71615e-06	up	yes	chrChr02:10146749-10151360:+	gi|356502535|ref|XP_003520074.1|	3920	0	PREDICTED: cullin-3A-like [Glycine max]
Glyma.02G107900.Wm82.a2.v1	201	172	211	102.981	0	1	0	5.40199	3.08081e-53	1.19121e-50	up	yes	chrChr02:10303196-10305744:+	gi|356499815|ref|XP_003518732.1|	1089	5e-147	PREDICTED: ribonuclease 1-like [Glycine max]
Glyma.02G109800.Wm82.a2.v1	446	525	522	343.615	155	214	148	1.61411	2.51663e-18	2.48261e-16	up	yes	chrChr02:10525394-10527411:-	gi|734357338|gb|KHN14494.1|	1507	0	NAC domain-containing protein 29 [Glycine soja]
Glyma.02G112000.Wm82.a2.v1	25	43	33	59.6287	92	81	95	-1.09626	4.18562e-05	0.000563877	down	yes	chrChr02:10852955-10859361:+	gi|356499851|ref|XP_003518749.1|	1275	5e-174	PREDICTED: putative exosome complex component rrp40-like isoform X1 [Glycine max]
Glyma.02G117000.Wm82.a2.v1	405	450	377	257.85	96	45	122	2.1536	4.45897e-17	3.93689e-15	up	yes	chrChr02:11395404-11402084:+	gi|571438023|ref|XP_006574439.1|	3364	0	PREDICTED: probable inactive purple acid phosphatase 1-like isoform X1 [Glycine max]
Glyma.02G119300.Wm82.a2.v1	106	61	48	53.5449	29	46	25	1.04705	0.00121375	0.00947314	up	yes	chrChr02:11746771-11748199:+	gi|734397111|gb|KHN29976.1|	1310	1e-177	hypothetical protein glysoja_014794 [Glycine soja]
Glyma.02G119600.Wm82.a2.v1	8	2	2	18.4819	43	13	49	-1.71556	3.18871e-05	0.000444345	down	yes	chrChr02:11775036-11777459:+	gi|356499899|ref|XP_003518773.1|	2489	0	PREDICTED: cytochrome P450 78A5-like [Glycine max]
Glyma.02G123500.Wm82.a2.v1	32	8	17	12.7179	5	8	4	1.13693	0.00596846	0.0345141	up	yes	chrChr02:12327499-12328217:+	gi|734397074|gb|KHN29939.1|	293	8e-31	hypothetical protein glysoja_014757 [Glycine soja]
Glyma.02G124300.Wm82.a2.v1	102	30	102	54.412	22	39	23	1.26429	0.00039001	0.00369773	up	yes	chrChr02:12425993-12427856:+	gi|356502666|ref|XP_003520138.1|	1427	0	PREDICTED: transcription factor MYB39-like [Glycine max]
Glyma.02G124900.Wm82.a2.v1	63	30	27	26.5051	3	24	7	1.25887	0.00189733	0.013602	up	yes	chrChr02:12479539-12481891:+	gi|734397062|gb|KHN29927.1|	1769	0	Protein SRG1-like protein [Glycine soja]
Glyma.02G125600.Wm82.a2.v1	694	834	512	434.883	283	114	91	1.91887	8.93784e-11	3.79346e-09	up	yes	chrChr02:12584740-12587472:+	gi|356499966|ref|XP_003518806.1|	3208	0	PREDICTED: probable indole-3-acetic acid-amido synthetase GH3.1 [Glycine max]
Glyma.02G129300.Wm82.a2.v1	375	579	286	292.166	157	159	158	1.43042	6.39444e-10	2.36376e-08	up	yes	chrChr02:13238816-13244513:+	gi|356502698|ref|XP_003520154.1|	2212	0	PREDICTED: proline-rich receptor-like protein kinase PERK10-like isoform X1 [Glycine max]
Glyma.02G130200.Wm82.a2.v1	1879	1579	1165	1195.58	717	1016	705	1.02582	4.79228e-07	1.01452e-05	up	yes	chrChr02:13340016-13346701:-	gi|356500006|ref|XP_003518826.1|	4033	0	PREDICTED: phosphate transporter PHO1 homolog 1-like isoform 1 [Glycine max]
Glyma.02G132200.Wm82.a2.v1	159	88	74	189.02	410	209	231	-1.06555	0.000193856	0.00206626	down	yes	chrChr02:13704118-13708015:+	gi|356500031|ref|XP_003518838.1|	2248	0	PREDICTED: abscisic acid 8'-hydroxylase 4-like [Glycine max]
Glyma.02G132500.Wm82.a2.v1	29	55	34	23.7087	10	8	1	1.90218	1.03139e-06	2.0566e-05	up	yes	chrChr02:13731474-13732535:+	gi|356500033|ref|XP_003518839.1|	941	2e-124	PREDICTED: ethylene-responsive transcription factor ERF109-like [Glycine max]
Glyma.02G133600.Wm82.a2.v1	655	715	462	452.328	251	247	333	1.23402	6.11716e-10	2.26898e-08	up	yes	chrChr02:13823369-13828028:-	gi|734415018|gb|KHN37498.1|	2200	0	hypothetical protein glysoja_034364 [Glycine soja]
Glyma.02G138200.Wm82.a2.v1	1	4	1	8.39587	15	12	20	-1.41788	0.000758079	0.00645761	down	yes	chrChr02:14307786-14310106:-	gi|734399712|gb|KHN31020.1|	261	7e-24	hypothetical protein glysoja_020318 [Glycine soja]
Glyma.02G138600.Wm82.a2.v1	80	66	40	39.7874	17	18	10	1.7823	8.88517e-08	2.16743e-06	up	yes	chrChr02:14362037-14363195:+	gi|356500112|ref|XP_003518878.1|	510	3e-61	PREDICTED: myosin-5-like [Glycine max]
Glyma.02G142400.Wm82.a2.v1	51	39	52	27.9579	12	3	4	2.24554	1.00518e-09	3.56191e-08	up	yes	chrChr02:14688639-14689877:-	gi|359807079|ref|NP_001241599.1|	281	7e-28	uncharacterized protein LOC100803065 [Glycine max]
Glyma.02G142500.Wm82.a2.v1	102	116	114	68.2581	24	16	23	2.28082	6.16969e-18	5.79727e-16	up	yes	chrChr02:14690185-14691925:-	gi|571442791|ref|XP_006575865.1|	656	8e-84	PREDICTED: auxin-induced protein AUX28-like [Glycine max]
Glyma.02G150600.Wm82.a2.v1	65	80	39	42.3761	24	25	15	1.38851	1.80904e-05	0.000267139	up	yes	chrChr02:15507498-15509859:-	gi|356502836|ref|XP_003520221.1|	2880	0	PREDICTED: probable LRR receptor-like serine/threonine-protein kinase RKF3-like [Glycine max]
Glyma.02G156800.Wm82.a2.v1	3652	2226	2888	1943.76	737	933	883	1.84798	1.59585e-22	2.08883e-20	up	yes	chrChr02:16787594-16790041:-	gi|380848783|ref|NP_001237210.2|	1350	2e-178	lectin precursor [Glycine max]
Glyma.02G157700.Wm82.a2.v1	57	47	56	93.2275	176	117	124	-1.09958	5.13239e-06	8.65405e-05	down	yes	chrChr02:17060683-17071744:-	gi|571440337|ref|XP_006575122.1|	6688	0	PREDICTED: condensin complex subunit 1-like isoform X2 [Glycine max]
Glyma.02G176100.Wm82.a2.v1	24	57	61	28.5573	8	9	6	2.03266	4.14907e-08	1.09553e-06	up	yes	chrChr02:28720956-28726702:-	gi|734324489|gb|KHN05139.1|	372	4e-40	hypothetical protein glysoja_045497 [Glycine soja]
Glyma.02G182600.Wm82.a2.v1	212	172	172	130.892	68	72	71	1.47118	6.64675e-13	3.80903e-11	up	yes	chrChr02:31342036-31344739:+	gi|356500495|ref|XP_003519067.1|	1079	4e-143	PREDICTED: probable serine/threonine-protein kinase DDB_G0272282-like [Glycine max]
Glyma.02G195400.Wm82.a2.v1	294	355	258	232.931	158	189	122	1.05043	3.70792e-07	8.0978e-06	up	yes	chrChr02:36872648-36875320:-	gi|356500585|ref|XP_003519112.1|	1371	0	PREDICTED: syntaxin-121-like [Glycine max]
Glyma.02G202500.Wm82.a2.v1	82	87	56	45.2367	7	9	20	2.24422	2.00359e-11	9.59013e-10	up	yes	chrChr02:38754600-38759102:+	gi|356500643|ref|XP_003519141.1|	2557	0	PREDICTED: NADP-dependent glyceraldehyde-3-phosphate dehydrogenase-like [Glycine max]
Glyma.02G206500.Wm82.a2.v1	339	322	260	237.97	155	177	153	1.04415	6.79917e-09	2.07171e-07	up	yes	chrChr02:39154706-39161370:+	gi|356498781|ref|XP_003518227.1|	5965	0	PREDICTED: uncharacterized protein LOC100794018 [Glycine max]
Glyma.02G208000.Wm82.a2.v1	3130	3032	1445	1835.5	889	1313	969	1.2988	1.23662e-07	2.95235e-06	up	yes	chrChr02:39276566-39279261:-	gi|356500703|ref|XP_003519171.1|	2249	0	PREDICTED: UDP-glucuronate 4-epimerase 1-like [Glycine max]
Glyma.02G210300.Wm82.a2.v1	106	182	287	131.031	62	102	27	1.39319	4.64508e-05	0.000614939	up	yes	chrChr02:39541304-39543047:-	gi|356500728|ref|XP_003519183.1|	977	1e-130	PREDICTED: uncharacterized protein LOC100802714 [Glycine max]
Glyma.02G211400.Wm82.a2.v1	219	263	213	168.859	110	113	75	1.3018	4.72398e-10	1.7815e-08	up	yes	chrChr02:39675173-39678485:+	gi|571441105|ref|XP_006575342.1|	2107	0	PREDICTED: serine/threonine-protein kinase PEPKR2-like isoform X2 [Glycine max]
Glyma.02G217600.Wm82.a2.v1	544	547	542	364.118	172	132	187	1.82858	6.0744e-28	9.82388e-26	up	yes	chrChr02:40441742-40452143:-	gi|571441197|ref|XP_006575370.1|	1511	0	PREDICTED: uncharacterized protein C5H10.03-like isoform X2 [Glycine max]
Glyma.02G222000.Wm82.a2.v1	14	10	13	26.7089	34	51	44	-1.29478	0.000138491	0.00157053	down	yes	chrChr02:40953440-40959908:+	gi|571441265|ref|XP_006575390.1|	1825	0	PREDICTED: WAT1-related protein At1g09380-like [Glycine max]
Glyma.02G222800.Wm82.a2.v1	139	128	118	86.0389	53	45	19	1.64061	9.40495e-09	2.78989e-07	up	yes	chrChr02:41032232-41033043:+	gi|571441277|ref|XP_006575394.1|	223	2e-20	PREDICTED: uncharacterized protein LOC102670521 [Glycine max]
Glyma.02G228200.Wm82.a2.v1	1106	1365	882	819.723	462	570	437	1.29129	3.85265e-12	2.03134e-10	up	yes	chrChr02:41552402-41554889:+	gi|356500878|ref|XP_003519257.1|	1542	0	PREDICTED: probable protein phosphatase 2C 25-like [Glycine max]
Glyma.02G228300.Wm82.a2.v1	82	69	134	64.5711	32	48	12	1.41979	3.71258e-05	0.000507672	up	yes	chrChr02:41567092-41568597:+	gi|571441344|ref|XP_006575415.1|	2084	0	PREDICTED: mitogen-activated protein kinase kinase kinase NPK1-like [Glycine max]
Glyma.02G232100.Wm82.a2.v1	667	532	425	405.961	387	204	179	1.12747	8.95472e-06	0.000143237	up	yes	chrChr02:41918879-41921596:+	gi|356500908|ref|XP_003519272.1|	3108	0	PREDICTED: exocyst complex component EXO70B1-like [Glycine max]
Glyma.02G237800.Wm82.a2.v1	1416	1278	960	871.367	519	426	515	1.43021	1.81654e-16	1.53534e-14	up	yes	chrChr02:42607230-42611324:-	gi|571441493|ref|XP_006575463.1|	1667	0	PREDICTED: KH domain-containing protein At3g08620 isoform X2 [Glycine max]
Glyma.02G239800.Wm82.a2.v1	29	35	21	19.966	8	12	12	1.18395	0.00115285	0.00909278	up	yes	chrChr02:42848299-42849703:+	gi|734420825|gb|KHN41021.1|	700	6e-89	hypothetical protein glysoja_013363 [Glycine soja]
Glyma.02G244900.Wm82.a2.v1	129	25	76	50.2831	18	22	22	1.51545	4.54021e-05	0.000602954	up	yes	chrChr02:43297348-43300008:-	gi|356501025|ref|XP_003519329.1|	1708	0	PREDICTED: GDSL esterase/lipase At5g37690-like isoform X1 [Glycine max]
Glyma.02G245700.Wm82.a2.v1	212	385	233	196.088	81	171	68	1.31914	8.70205e-06	0.000139861	up	yes	chrChr02:43391804-43393333:-	gi|356501039|ref|XP_003519336.1|	717	1e-89	PREDICTED: probable calcium-binding protein CML18-like [Glycine max]
Glyma.02G249300.Wm82.a2.v1	97	51	64	51.5742	31	24	36	1.18224	9.34033e-05	0.00111934	up	yes	chrChr02:43682559-43685068:-	gi|571441653|ref|XP_006575508.1|	2450	0	PREDICTED: glycerol-3-phosphate acyltransferase 5-like [Glycine max]
Glyma.02G251000.Wm82.a2.v1	121	118	94	190.217	264	252	326	-1.10065	1.71996e-08	4.84976e-07	down	yes	chrChr02:43843555-43844926:+	gi|734352391|gb|KHN13113.1|	1299	2e-177	Hypothetical protein glysoja_037555 [Glycine soja]
Glyma.02G252200.Wm82.a2.v1	7	8	7	16.668	34	25	23	-1.24311	0.000950497	0.00779467	down	yes	chrChr02:43927109-43932886:-	gi|734352379|gb|KHN13101.1|	4223	0	Cucumisin [Glycine soja]
Glyma.02G253500.Wm82.a2.v1	500	464	268	701.347	1157	985	960	-1.08288	2.43127e-07	5.52684e-06	down	yes	chrChr02:44074940-44078064:+	gi|351734512|ref|NP_001236077.1|	594	5e-74	uncharacterized protein LOC100305997 [Glycine max]
Glyma.02G254800.Wm82.a2.v1	34	30	27	17.4142	8	1	0	2.05221	5.48585e-07	1.1486e-05	up	yes	chrChr02:44191120-44192293:-	gi|356499151|ref|XP_003518406.1|	880	2e-117	PREDICTED: WUSCHEL-related homeobox 5-like [Glycine max]
Glyma.02G255200.Wm82.a2.v1	261	193	143	136.248	70	66	63	1.59829	4.20515e-11	1.88655e-09	up	yes	chrChr02:44225495-44228320:-	gi|356499153|ref|XP_003518407.1|	2396	0	PREDICTED: uncharacterized protein LOC100775399 [Glycine max]
Glyma.02G255400.Wm82.a2.v1	413	366	92	176.222	48	67	31	1.62742	8.24612e-05	0.00100723	up	yes	chrChr02:44231578-44233784:-	gi|351726303|ref|NP_001236610.1|	2356	0	nematode resistance HS1pro1 protein [Glycine max]
Glyma.02G255500.Wm82.a2.v1	973	1054	857	1547.52	2090	2233	2329	-1.00849	3.36675e-14	2.26508e-12	down	yes	chrChr02:44240358-44242714:-	gi|351725493|ref|NP_001238374.1|	1462	0	60S acidic ribosomal protein P0 [Glycine max]
Glyma.02G257600.Wm82.a2.v1	921	996	973	698.642	416	401	399	1.38848	1.91346e-28	3.17077e-26	up	yes	chrChr02:44404603-44409568:-	gi|571441760|ref|XP_006575539.1|	3531	0	PREDICTED: dual specificity protein kinase pom1-like [Glycine max]
Glyma.02G258600.Wm82.a2.v1	24	20	16	43.4244	103	39	69	-1.31088	9.69391e-05	0.00115723	down	yes	chrChr02:44580131-44581457:+	gi|571441779|ref|XP_003518414.2|	628	1e-76	PREDICTED: uncharacterized protein LOC100780743 [Glycine max]
Glyma.02G261400.Wm82.a2.v1	11	8	9	18.0886	20	36	28	-1.03363	0.00560904	0.0328144	down	yes	chrChr02:44744143-44747306:+	gi|356499179|ref|XP_003518420.1|	3661	0	PREDICTED: probably inactive leucine-rich repeat receptor-like protein kinase IMK2-like [Glycine max]
Glyma.02G261600.Wm82.a2.v1	93	34	41	41.0418	26	30	17	1.06524	0.00252493	0.0171831	up	yes	chrChr02:44758969-44763198:+	gi|356501207|ref|XP_003519418.1|	2972	0	PREDICTED: laccase-5-like [Glycine max]
Glyma.02G263200.Wm82.a2.v1	873	958	873	1455.09	1970	2175	2118	-1.01878	7.04325e-17	6.08606e-15	down	yes	chrChr02:44888097-44890653:-	gi|351725821|ref|NP_001235826.1|	1246	5e-169	40S ribosomal S4 protein [Glycine max]
Glyma.02G265900.Wm82.a2.v1	90	222	240	110.38	13	51	21	2.2065	3.79645e-10	1.45786e-08	up	yes	chrChr02:45073475-45074323:+	gi|351721377|ref|NP_001237975.1|	702	2e-90	uncharacterized protein LOC100500687 [Glycine max]
Glyma.02G267900.Wm82.a2.v1	1900	2258	2241	1407.08	574	609	615	1.95299	2.75229e-50	9.35194e-48	up	yes	chrChr02:45247639-45251739:+	gi|571441894|ref|XP_006575576.1|	1057	6e-140	PREDICTED: probable tyrosine-protein phosphatase At1g05000-like [Glycine max]
Glyma.02G268000.Wm82.a2.v1	126	133	92	82.9716	66	35	35	1.35456	9.12845e-07	1.83108e-05	up	yes	chrChr02:45262242-45264179:-	gi|356501269|ref|XP_003519448.1|	1479	0	PREDICTED: 1-aminocyclopropane-1-carboxylate oxidase [Glycine max]
Glyma.02G274400.Wm82.a2.v1	290	399	233	236.801	147	183	147	1.04054	1.75553e-06	3.31953e-05	up	yes	chrChr02:45751520-45753085:-	gi|356501342|ref|XP_003519484.1|	1149	2e-152	PREDICTED: uncharacterized protein LOC100789647 [Glycine max]
Glyma.02G277600.Wm82.a2.v1	38	33	33	58.8989	101	77	82	-1.02785	7.20363e-05	0.000899157	down	yes	chrChr02:46031034-46033706:-	gi|356501386|ref|XP_003519506.1|	2199	0	PREDICTED: G2/mitotic-specific cyclin-1-like [Glycine max]
Glyma.02G278400.Wm82.a2.v1	7	1	6	12.4618	27	24	13	-1.20499	0.00344468	0.022156	down	yes	chrChr02:46094573-46096119:-	gi|356499299|ref|XP_003518479.1|	1368	0	PREDICTED: heat stress transcription factor B-4b [Glycine max]
Glyma.02G280100.Wm82.a2.v1	72	60	60	46.6739	19	52	11	1.05722	0.00342995	0.0220908	up	yes	chrChr02:46249864-46251394:-	gi|356499315|ref|XP_003518487.1|	1133	5e-155	PREDICTED: uncharacterized protein LOC100776840 [Glycine max]
Glyma.02G286200.Wm82.a2.v1	9	19	16	31.3227	59	58	34	-1.26936	0.000212056	0.00223073	down	yes	chrChr02:46706387-46707470:+	gi|356501471|ref|XP_003519548.1|	136	2e-08	PREDICTED: uncharacterized protein LOC100779505 [Glycine max]
Glyma.02G286600.Wm82.a2.v1	29	27	12	47.8703	87	58	85	-1.31761	2.87932e-05	0.000405601	down	yes	chrChr02:46727383-46732338:+	gi|356501475|ref|XP_003519550.1|	2352	0	PREDICTED: DNA primase small subunit [Glycine max]
Glyma.02G288500.Wm82.a2.v1	64	64	68	49.1731	37	28	29	1.08987	5.44686e-05	0.000705804	up	yes	chrChr02:46857783-46863525:+	gi|356501489|ref|XP_003519557.1|	2565	0	PREDICTED: citrate synthase, glyoxysomal-like [Glycine max]
Glyma.02G289900.Wm82.a2.v1	533	596	656	432.286	244	238	274	1.36215	9.98265e-19	1.00843e-16	up	yes	chrChr02:46959425-46964970:+	gi|356501509|ref|XP_003519567.1|	2597	0	PREDICTED: uncharacterized protein LOC100789468 isoform X1 [Glycine max]
Glyma.02G292800.Wm82.a2.v1	8253	6541	6193	4889.6	3758	1735	2170	1.49936	6.87143e-11	2.97354e-09	up	yes	chrChr02:47164820-47167693:-	gi|356501552|ref|XP_003519588.1|	2333	0	PREDICTED: GDP-L-galactose phosphorylase 1-like [Glycine max]
Glyma.02G296500.Wm82.a2.v1	115	70	91	69.2541	50	55	27	1.0673	0.000237101	0.00244981	up	yes	chrChr02:47431279-47434536:+	gi|734426741|gb|KHN43861.1|	1606	0	Pirin-like protein [Glycine soja]
Glyma.02G300000.Wm82.a2.v1	1022	1206	1362	873.773	507	595	446	1.32839	1.29125e-15	9.8944e-14	up	yes	chrChr02:47663469-47665514:-	gi|734426774|gb|KHN43894.1|	727	4e-92	hypothetical protein glysoja_025933 [Glycine soja]
Glyma.02G302800.Wm82.a2.v1	47	32	44	75.8543	131	112	104	-1.19723	1.32129e-06	2.55735e-05	down	yes	chrChr02:47823543-47832755:-	gi|356499469|ref|XP_003518562.1|	5700	0	PREDICTED: kinesin-4-like [Glycine max]
Glyma.02G307500.Wm82.a2.v1	665	550	442	1165.5	2617	1107	1884	-1.43527	4.91225e-09	1.53145e-07	down	yes	chrChr02:48175535-48177218:-	gi|734426847|gb|KHN43967.1|	390	2e-42	hypothetical protein glysoja_026006 [Glycine soja]
Glyma.02G307800.Wm82.a2.v1	1	2	1	6.48736	13	15	9	-1.36838	0.00120988	0.00944878	down	yes	chrChr02:48187158-48187542:+	.	.	.	.
Glyma.03G005800.Wm82.a2.v1	114	130	208	256.366	356	390	385	-1.07032	8.50597e-07	1.71748e-05	down	yes	chrChr03:545102-549977:-	gi|356504238|ref|XP_003520904.1|	2373	0	PREDICTED: protein TRANSPARENT TESTA 12 [Glycine max]
Glyma.03G008200.Wm82.a2.v1	138	103	76	70.9957	33	34	30	1.64952	2.40917e-09	8.03988e-08	up	yes	chrChr03:793191-799880:-	gi|356504368|ref|XP_003520968.1|	3071	0	PREDICTED: probable anion transporter 2, chloroplastic-like [Glycine max]
Glyma.03G008800.Wm82.a2.v1	63	59	34	27.6217	0	0	1	3.56371	4.0689e-19	4.23758e-17	up	yes	chrChr03:849315-855621:-	gi|571443792|ref|XP_006576313.1|	4624	0	PREDICTED: U-box domain-containing protein 33-like isoform X2 [Glycine max]
Glyma.03G009700.Wm82.a2.v1	845	844	896	568.774	248	240	240	1.94866	2.86505e-48	8.84195e-46	up	yes	chrChr03:963591-968416:-	gi|356504432|ref|XP_003521000.1|	2406	0	PREDICTED: uncharacterized protein LOC100800227 [Glycine max]
Glyma.03G016900.Wm82.a2.v1	38	27	6	15.4822	7	10	2	1.15303	0.00589182	0.0341539	up	yes	chrChr03:1702419-1707451:+	gi|571443935|ref|XP_006576360.1|	1710	0	PREDICTED: uncharacterized protein LOC100785249 isoform X2 [Glycine max]
Glyma.03G017100.Wm82.a2.v1	33	17	21	46.1044	73	66	76	-1.21962	3.77775e-05	0.000514701	down	yes	chrChr03:1729054-1732871:-	gi|356506300|ref|XP_003521923.1|	2808	0	PREDICTED: U-box domain-containing protein 12-like isoform X1 [Glycine max]
Glyma.03G032300.Wm82.a2.v1	12	23	9	8.98481	3	3	2	1.40183	0.000833586	0.00698683	up	yes	chrChr03:3690272-3692978:-	gi|571447491|ref|XP_006577407.1|	1691	0	PREDICTED: cysteine-rich receptor-like protein kinase 24-like [Glycine max]
Glyma.03G032500.Wm82.a2.v1	58	37	75	96.9853	197	119	114	-1.01411	0.000329435	0.00321866	down	yes	chrChr03:3716149-3718912:-	gi|356506424|ref|XP_003521983.1|	2609	0	PREDICTED: anthocyanidin 3-O-glucosyltransferase 5-like [Glycine max]
Glyma.03G039300.Wm82.a2.v1	46	49	43	34.1502	16	24	23	1.09512	0.000374378	0.00357369	up	yes	chrChr03:4890564-4894600:+	gi|356506439|ref|XP_003521990.1|	6128	0	PREDICTED: putative disease resistance protein At3g14460-like [Glycine max]
Glyma.03G041000.Wm82.a2.v1	27	51	29	26.0063	15	19	12	1.07577	0.00221591	0.015481	up	yes	chrChr03:5173710-5176917:-	gi|356506742|ref|XP_003522135.1|	1084	1e-146	PREDICTED: protein LURP-one-related 15 [Glycine max]
Glyma.03G047100.Wm82.a2.v1	46	34	46	85.2086	169	104	131	-1.35096	1.39275e-07	3.2924e-06	down	yes	chrChr03:5986288-5990191:+	gi|720003507|ref|XP_010257016.1|	2484	0	PREDICTED: probably inactive leucine-rich repeat receptor-like protein kinase IMK2 [Nelumbo nucifera]
Glyma.03G048500.Wm82.a2.v1	133	112	122	93.0349	77	69	36	1.05551	6.16557e-05	0.000787111	up	yes	chrChr03:6248606-6264244:-	gi|734318457|gb|KHN03083.1|	5158	0	Putative disease resistance protein [Glycine soja]
Glyma.03G050100.Wm82.a2.v1	1700	1308	1965	1234.17	626	828	837	1.22353	3.96971e-11	1.79969e-09	up	yes	chrChr03:6536628-6540105:+	gi|356503052|ref|XP_003520326.1|	1015	2e-134	PREDICTED: ferritin-2, chloroplastic [Glycine max]
Glyma.03G054800.Wm82.a2.v1	35	38	28	22.9442	8	14	11	1.37742	9.11522e-05	0.00109666	up	yes	chrChr03:7453988-7457813:-	gi|571444458|ref|XP_006576518.1|	4862	0	PREDICTED: receptor-like protein 12-like [Glycine max]
Glyma.03G062500.Wm82.a2.v1	3	1	0	7.26284	16	12	14	-1.45692	0.000568154	0.00509181	down	yes	chrChr03:9653237-9657411:-	gi|734432582|gb|KHN46339.1|	2032	0	Phosphoglucan, water dikinase, chloroplastic [Glycine soja]
Glyma.03G062800.Wm82.a2.v1	21	5	5	24.9302	64	22	39	-1.1922	0.00294456	0.0194563	down	yes	chrChr03:9706039-9709469:+	gi|356503891|ref|XP_003520734.1|	1725	0	PREDICTED: uncharacterized protein LOC100778097 [Glycine max]
Glyma.03G063000.Wm82.a2.v1	36	21	24	47.5188	82	58	73	-1.04874	0.000351032	0.00338737	down	yes	chrChr03:9782464-9787213:-	gi|571444541|ref|XP_006576541.1|	2416	0	PREDICTED: ribonuclease E/G-like protein, chloroplastic-like [Glycine max]
Glyma.03G067800.Wm82.a2.v1	61	99	51	50.5387	30	25	31	1.2442	3.7925e-05	0.000516293	up	yes	chrChr03:14004704-14006681:-	gi|571444587|ref|XP_006576551.1|	2091	0	PREDICTED: uncharacterized protein LOC102667149 [Glycine max]
Glyma.03G069300.Wm82.a2.v1	383	285	488	285.926	291	146	92	1.11691	0.000167872	0.00183286	up	yes	chrChr03:14502541-14504971:-	gi|356506718|ref|XP_003522123.1|	2516	0	PREDICTED: L-type lectin-domain containing receptor kinase S.4-like [Glycine max]
Glyma.03G069400.Wm82.a2.v1	30	46	35	26.2341	15	8	20	1.19348	0.000684623	0.00593252	up	yes	chrChr03:14507722-14520067:-	gi|356504258|ref|XP_003520914.1|	3514	0	PREDICTED: delta-1-pyrroline-5-carboxylate synthase-like isoform X1 [Glycine max]
Glyma.03G073400.Wm82.a2.v1	350	302	220	226.092	146	163	155	1.01503	5.95075e-07	1.23719e-05	up	yes	chrChr03:17839275-17842224:+	gi|571443405|ref|XP_006576152.1|	673	6e-85	PREDICTED: uncharacterized protein LOC100306338 isoform X1 [Glycine max]
Glyma.03G074600.Wm82.a2.v1	167	182	190	108.569	40	14	34	2.4599	8.9977e-20	9.85908e-18	up	yes	chrChr03:18550945-18551974:+	gi|351721298|ref|NP_001235669.1|	921	1e-121	uncharacterized protein LOC100499762 [Glycine max]
Glyma.03G077300.Wm82.a2.v1	16	13	9	25.591	48	46	27	-1.15763	0.00101898	0.00825291	down	yes	chrChr03:19174767-19178097:-	gi|734316216|gb|KHN02148.1|	1125	1e-146	hypothetical protein glysoja_038258 [Glycine soja]
Glyma.03G078700.Wm82.a2.v1	103	75	99	155.62	306	202	177	-1.03299	1.4213e-05	0.000216537	down	yes	chrChr03:19749063-19752544:-	gi|734400798|gb|KHN31579.1|	1483	0	Putative aquaporin PIP1-4 [Glycine soja]
Glyma.03G081200.Wm82.a2.v1	61	89	61	47.9007	22	23	24	1.53798	1.09781e-07	2.64727e-06	up	yes	chrChr03:21874899-21878845:+	gi|571444783|ref|XP_006576610.1|	2334	0	PREDICTED: type I inositol 1,4,5-trisphosphate 5-phosphatase CVP2-like isoform X2 [Glycine max]
Glyma.03G081800.Wm82.a2.v1	271	255	237	170.812	98	52	84	1.73833	5.13728e-15	3.73246e-13	up	yes	chrChr03:22345057-22350273:+	gi|571444810|ref|XP_003522204.2|	4256	0	PREDICTED: putative pentatricopeptide repeat-containing protein At3g47840-like isoform X1 [Glycine max]
Glyma.03G082900.Wm82.a2.v1	21	19	23	13.1269	3	5	5	1.60037	5.52261e-05	0.000713422	up	yes	chrChr03:23010927-23013530:+	gi|356506893|ref|XP_003522208.1|	873	2e-114	PREDICTED: uncharacterized protein LOC100779898 [Glycine max]
Glyma.03G085500.Wm82.a2.v1	32	30	46	25.6105	6	27	9	1.07548	0.00518096	0.0307322	up	yes	chrChr03:25086166-25090716:-	gi|356504404|ref|XP_003520986.1|	2453	0	PREDICTED: uncharacterized protein LOC100792313 [Glycine max]
Glyma.03G085700.Wm82.a2.v1	1508	1685	1733	1243.21	760	824	823	1.17657	1.15463e-20	1.35807e-18	up	yes	chrChr03:25259322-25269895:-	gi|356504406|ref|XP_003520987.1|	2252	0	PREDICTED: serine/threonine-protein kinase MHK-like isoform X1 [Glycine max]
Glyma.03G086400.Wm82.a2.v1	962	889	860	1493.17	1982	2222	2293	-1.06363	2.246e-16	1.87013e-14	down	yes	chrChr03:25547027-25549682:+	gi|356504414|ref|XP_003520991.1|	837	6e-109	PREDICTED: 40S ribosomal protein S8-like [Glycine max]
Glyma.03G089000.Wm82.a2.v1	452	411	433	310.339	186	171	169	1.42318	1.33286e-20	1.55681e-18	up	yes	chrChr03:26517983-26545285:+	gi|356504420|ref|XP_003520994.1|	5121	0	PREDICTED: uncharacterized protein LOC100797051 [Glycine max]
Glyma.03G092800.Wm82.a2.v1	25	31	57	21.1302	4	3	1	2.48453	4.1646e-10	1.58836e-08	up	yes	chrChr03:27508753-27513684:-	gi|356504452|ref|XP_003521010.1|	2734	0	PREDICTED: non-specific phospholipase C4-like isoform X1 [Glycine max]
Glyma.03G102800.Wm82.a2.v1	454	485	441	353.678	236	227	246	1.09778	4.48559e-14	2.95864e-12	up	yes	chrChr03:29531223-29538669:-	gi|356504503|ref|XP_003521035.1|	3214	0	PREDICTED: dynamin-related protein 1E-like isoform 1 [Glycine max]
Glyma.03G104300.Wm82.a2.v1	991	1237	1221	788.453	399	406	357	1.68616	2.18552e-30	3.99559e-28	up	yes	chrChr03:29858646-29861882:-	gi|356504515|ref|XP_003521041.1|	1937	0	PREDICTED: 1-aminocyclopropane-1-carboxylate oxidase homolog 1 [Glycine max]
Glyma.03G105200.Wm82.a2.v1	54	57	40	98.5604	217	98	147	-1.25619	7.4042e-06	0.000120732	down	yes	chrChr03:30065251-30087166:+	gi|571445065|ref|XP_006576688.1|	5591	0	PREDICTED: uncharacterized protein LOC100810533 isoform X2 [Glycine max]
Glyma.03G105400.Wm82.a2.v1	856	994	1228	1931.06	2753	2579	3558	-1.2971	1.89921e-13	1.16583e-11	down	yes	chrChr03:30187959-30189612:+	gi|734371916|gb|KHN19719.1|	440	6e-51	hypothetical protein glysoja_046293 [Glycine soja]
Glyma.03G115000.Wm82.a2.v1	4	0	2	7.00455	13	18	7	-1.11453	0.00833639	0.0448972	down	yes	chrChr03:32245793-32247012:-	gi|734368813|gb|KHN18967.1|	680	5e-106	hypothetical protein glysoja_039891 [Glycine soja]
Glyma.03G123600.Wm82.a2.v1	66	60	71	132.028	219	214	190	-1.39998	2.64306e-12	1.42256e-10	down	yes	chrChr03:33648276-33651507:-	gi|351726740|ref|NP_001236113.1|	2029	0	G2/mitotic-specific cyclin S13-6 [Glycine max]
Glyma.03G124900.Wm82.a2.v1	19	6	12	24.6345	39	23	54	-1.06259	0.00487776	0.0293058	down	yes	chrChr03:33837084-33841553:-	gi|356503369|ref|XP_003520482.1|	4278	0	PREDICTED: putative SWI/SNF-related matrix-associated actin-dependent regulator of chromatin subfamily A member 3-like 1-like [Glycine max]
Glyma.03G125300.Wm82.a2.v1	60	63	85	50.2244	27	41	19	1.2084	7.00729e-05	0.000878235	up	yes	chrChr03:33890951-33893562:+	gi|823123866|ref|XP_012477649.1|	143	4e-09	PREDICTED: mitotic-spindle organizing protein 1B-like isoform X1 [Gossypium raimondii]
Glyma.03G125600.Wm82.a2.v1	39	18	25	19.7768	8	12	14	1.04891	0.00514465	0.0305761	up	yes	chrChr03:33929465-33932834:+	gi|356503377|ref|XP_003520486.1|	2473	0	PREDICTED: serine carboxypeptidase-like 45-like isoform X1 [Glycine max]
Glyma.03G127200.Wm82.a2.v1	601	600	609	354.703	73	70	88	3.01163	2.99098e-72	1.73471e-69	up	yes	chrChr03:34122317-34127918:+	gi|356504690|ref|XP_003521128.1|	4642	0	PREDICTED: alpha-xylosidase 1-like isoform X1 [Glycine max]
Glyma.03G130400.Wm82.a2.v1	56	53	35	33.3219	18	19	14	1.36967	2.1941e-05	0.000318115	up	yes	chrChr03:34529866-34531816:+	gi|356503405|ref|XP_003520500.1|	1184	3e-162	PREDICTED: transcription factor ORG2-like [Glycine max]
Glyma.03G131100.Wm82.a2.v1	1033	985	910	640.007	300	208	290	1.96667	1.58198e-32	3.09397e-30	up	yes	chrChr03:34628886-34631900:+	gi|734397949|gb|KHN30390.1|	2466	0	UDP-sulfoquinovose synthase, chloroplastic [Glycine soja]
Glyma.03G131600.Wm82.a2.v1	434	343	508	310.604	210	192	138	1.33268	1.12685e-10	4.67975e-09	up	yes	chrChr03:34657711-34658702:+	gi|356504744|ref|XP_003521155.1|	489	3e-58	PREDICTED: uncharacterized protein LOC100793368 [Glycine max]
Glyma.03G131900.Wm82.a2.v1	2539	2854	3316	2152.09	1735	1194	1042	1.23787	5.86659e-11	2.56961e-09	up	yes	chrChr03:34686091-34687835:+	gi|356504748|ref|XP_003521157.1|	548	7e-66	PREDICTED: protein EARLY RESPONSIVE TO DEHYDRATION 15-like [Glycine max]
Glyma.03G138000.Wm82.a2.v1	978	1367	579	744.742	547	494	434	1.05601	1.1029e-05	0.000172883	up	yes	chrChr03:35409905-35414390:-	gi|356504799|ref|XP_003521182.1|	2764	0	PREDICTED: calcium-dependent protein kinase 32-like [Glycine max]
Glyma.03G141800.Wm82.a2.v1	32	16	22	41.9188	56	85	48	-1.03527	0.00137615	0.0105056	down	yes	chrChr03:35784951-35786210:+	gi|356504831|ref|XP_003521198.1|	941	7e-124	PREDICTED: protein POLYCHOME-like [Glycine max]
Glyma.03G142200.Wm82.a2.v1	364	312	317	592.795	853	982	838	-1.21708	2.81918e-16	2.31018e-14	down	yes	chrChr03:35800933-35802532:+	gi|356504833|ref|XP_003521199.1|	643	1e-82	PREDICTED: 40S ribosomal protein S20-1-like [Glycine max]
Glyma.03G142300.Wm82.a2.v1	309	345	337	548.069	741	933	715	-1.05813	4.11609e-11	1.85109e-09	down	yes	chrChr03:35804294-35806097:+	gi|351723425|ref|NP_001238046.1|	604	2e-76	uncharacterized protein LOC100500179 [Glycine max]
Glyma.03G143200.Wm82.a2.v1	50	51	44	86.5349	163	117	111	-1.14372	2.34118e-06	4.2965e-05	down	yes	chrChr03:35896465-35898537:-	gi|351726311|ref|NP_001237634.1|	581	5e-71	uncharacterized protein LOC100527546 [Glycine max]
Glyma.03G144500.Wm82.a2.v1	11562	10498	11703	8813.44	7389	5842	5151	1.01603	1.68487e-11	8.17855e-10	up	yes	chrChr03:36014626-36020913:+	gi|734332468|gb|KHN07428.1|	1980	0	Omega-6 fatty acid desaturase, endoplasmic reticulum isozyme 2 [Glycine soja]
Glyma.03G153200.Wm82.a2.v1	44	36	38	29.5433	14	20	22	1.02418	0.00149394	0.0112679	up	yes	chrChr03:36815745-36819041:-	gi|356504926|ref|XP_003521245.1|	971	2e-130	PREDICTED: uncharacterized protein LOC100796168 [Glycine max]
Glyma.03G153600.Wm82.a2.v1	25	15	14	42.6086	87	71	54	-1.49451	2.08356e-06	3.87874e-05	down	yes	chrChr03:36876067-36878417:-	gi|734372671|gb|KHN19894.1|	1529	0	hypothetical protein glysoja_033526 [Glycine soja]
Glyma.03G156000.Wm82.a2.v1	246	234	294	201.001	126	155	133	1.0186	4.50744e-08	1.17997e-06	up	yes	chrChr03:37125939-37130861:-	gi|356504941|ref|XP_003521251.1|	1827	0	PREDICTED: F-box/kelch-repeat protein SKIP30-like isoform X1 [Glycine max]
Glyma.03G156700.Wm82.a2.v1	1	1	7	9.39032	17	11	22	-1.17728	0.00524218	0.0310252	down	yes	chrChr03:37189825-37198694:-	gi|356504955|ref|XP_003521258.1|	3307	0	PREDICTED: sulfate transporter 3.1-like [Glycine max]
Glyma.03G157000.Wm82.a2.v1	47	45	70	94.8202	175	112	138	-1.09513	1.61581e-05	0.000241907	down	yes	chrChr03:37234761-37239236:+	gi|734345391|gb|KHN10689.1|	1464	0	hypothetical protein glysoja_019120 [Glycine soja]
Glyma.03G162800.Wm82.a2.v1	1193	1104	1496	909.353	532	566	448	1.40816	1.46159e-17	1.33605e-15	up	yes	chrChr03:37771714-37775073:+	gi|356505011|ref|XP_003521286.1|	2791	0	PREDICTED: probable inorganic phosphate transporter 1-7 [Glycine max]
Glyma.03G170400.Wm82.a2.v1	31	30	47	62.3004	91	89	97	-1.05852	5.44126e-05	0.000705623	down	yes	chrChr03:38529905-38532499:+	gi|571448131|ref|XP_003520626.2|	2885	0	PREDICTED: ankyrin repeat domain-containing protein 6-like [Glycine max]
Glyma.03G175300.Wm82.a2.v1	204	71	123	100.686	52	59	84	1.00755	0.00120449	0.00941449	up	yes	chrChr03:38882750-38885412:+	gi|356503683|ref|XP_003520635.1|	3554	0	PREDICTED: ABC transporter G family member 20-like [Glycine max]
Glyma.03G175800.Wm82.a2.v1	58	65	63	116.073	161	177	195	-1.26001	1.49629e-09	5.16242e-08	down	yes	chrChr03:38903690-38906090:-	gi|359806230|ref|NP_001241465.1|	1455	0	uncharacterized protein LOC100814304 [Glycine max]
Glyma.03G176900.Wm82.a2.v1	226	257	232	155.664	68	62	61	1.96141	2.2212e-24	3.11329e-22	up	yes	chrChr03:38969367-38972075:+	gi|571446123|ref|XP_006577002.1|	545	6e-66	PREDICTED: thioredoxin-like protein AAED1, chloroplastic-like isoform X3 [Glycine max]
Glyma.03G177400.Wm82.a2.v1	143	188	181	310.262	420	481	507	-1.23211	1.35558e-12	7.52479e-11	down	yes	chrChr03:38996064-38998050:+	gi|571446129|ref|XP_006577004.1|	1924	0	PREDICTED: 60S ribosomal protein L4-like isoform X2 [Glycine max]
Glyma.03G177900.Wm82.a2.v1	77	54	63	110.262	161	144	182	-1.06873	1.53693e-06	2.93921e-05	down	yes	chrChr03:39059143-39063253:+	gi|571446141|ref|XP_003520643.2|	3529	0	PREDICTED: flocculation protein FLO11-like [Glycine max]
Glyma.03G181000.Wm82.a2.v1	31	23	28	17.0845	9	1	7	1.61769	4.31246e-05	0.000577726	up	yes	chrChr03:39276813-39277467:-	gi|734340696|gb|KHN09501.1|	228	2e-21	hypothetical protein glysoja_016600 [Glycine soja]
Glyma.03G183300.Wm82.a2.v1	483	364	278	283.152	272	91	183	1.0572	0.000238621	0.00246301	up	yes	chrChr03:39516238-39518212:-	gi|356505250|ref|XP_003521405.1|	1225	4e-164	PREDICTED: heterogeneous nuclear ribonucleoprotein D-like [Glycine max]
Glyma.03G184500.Wm82.a2.v1	35	33	78	86.4566	147	134	108	-1.06626	0.000285078	0.00285749	down	yes	chrChr03:39630673-39633343:+	gi|734340727|gb|KHN09532.1|	1356	0	Putative xyloglucan endotransglucosylase/hydrolase protein 32 [Glycine soja]
Glyma.03G189900.Wm82.a2.v1	49	55	31	23.7586	0	0	0	3.51606	3.90737e-18	3.76619e-16	up	yes	chrChr03:40073618-40076667:+	gi|356503771|ref|XP_003520677.1|	2624	0	PREDICTED: cytochrome P450 76A2-like [Glycine max]
Glyma.03G197200.Wm82.a2.v1	13	9	10	6.26094	1	0	3	1.35136	0.00137442	0.0104982	up	yes	chrChr03:40664580-40665418:+	gi|356505388|ref|XP_003521473.1|	555	2e-68	PREDICTED: indole-3-acetic acid-induced protein ARG7-like [Glycine max]
Glyma.03G197500.Wm82.a2.v1	18	18	9	36.6857	58	61	65	-1.54023	1.13884e-06	2.24425e-05	down	yes	chrChr03:40687129-40689584:-	gi|571490022|ref|XP_003538445.2|	684	5e-86	PREDICTED: 60S ribosomal protein L32-1-like [Glycine max]
Glyma.03G197900.Wm82.a2.v1	11	21	7	25.1133	46	30	41	-1.06645	0.00322049	0.0209463	down	yes	chrChr03:40721164-40723468:+	gi|356503823|ref|XP_003520702.1|	1277	7e-174	PREDICTED: NAC domain-containing protein 90-like [Glycine max]
Glyma.03G201100.Wm82.a2.v1	65	191	115	88.0653	37	78	31	1.20132	0.000420025	0.00393332	up	yes	chrChr03:40972049-40972976:-	gi|359807538|ref|NP_001240894.1|	1142	2e-155	uncharacterized protein LOC100793725 [Glycine max]
Glyma.03G202600.Wm82.a2.v1	104	143	175	90.371	33	59	11	1.73782	4.14711e-07	8.9055e-06	up	yes	chrChr03:41097162-41098756:+	gi|356503852|ref|XP_003520716.1|	2151	0	PREDICTED: E3 ubiquitin-protein ligase PUB22-like [Glycine max]
Glyma.03G203300.Wm82.a2.v1	15	17	25	49.7024	90	75	89	-1.71074	3.18144e-09	1.03429e-07	down	yes	chrChr03:41167240-41169059:-	gi|593799899|ref|XP_007162987.1|	1045	5e-135	hypothetical protein PHAVU_001G196900g [Phaseolus vulgaris]
Glyma.03G203600.Wm82.a2.v1	196	196	203	143.559	67	107	74	1.33059	8.54183e-10	3.05679e-08	up	yes	chrChr03:41185335-41189320:-	gi|571559151|ref|XP_006604663.1|	2654	0	PREDICTED: uncharacterized protein LOC100815920 [Glycine max]
Glyma.03G205400.Wm82.a2.v1	174	196	60	105.602	48	94	49	1.07598	0.00133568	0.0102676	up	yes	chrChr03:41340149-41343255:-	gi|356505457|ref|XP_003521507.1|	1626	0	PREDICTED: probable carboxylesterase 15-like [Glycine max]
Glyma.03G205700.Wm82.a2.v1	55	67	36	39.5206	27	27	21	1.0433	0.000809804	0.00681877	up	yes	chrChr03:41366606-41369599:+	gi|571443486|ref|XP_006576192.1|	1999	0	PREDICTED: uncharacterized protein LOC100526857 isoform X1 [Glycine max]
Glyma.03G207700.Wm82.a2.v1	153	149	129	237.462	363	375	296	-1.03974	5.64013e-09	1.74222e-07	down	yes	chrChr03:41505894-41507252:+	gi|356505487|ref|XP_003521522.1|	263	4e-27	PREDICTED: 40S ribosomal protein S28-like isoform X1 [Glycine max]
Glyma.03G217500.Wm82.a2.v1	86	73	104	147.943	243	184	224	-1.05968	4.32092e-07	9.22867e-06	down	yes	chrChr03:42137961-42142595:+	gi|356505610|ref|XP_003521583.1|	5705	0	PREDICTED: cellulose synthase-like protein D5-like [Glycine max]
Glyma.03G219200.Wm82.a2.v1	62	57	33	89.3673	143	99	159	-1.08306	6.48723e-05	0.000822245	down	yes	chrChr03:42276172-42281598:-	gi|734370275|gb|KHN19217.1|	3707	0	Protein PROLIFERA [Glycine soja]
Glyma.03G224100.Wm82.a2.v1	11	7	16	6.61126	2	1	1	1.43947	0.000661826	0.00576592	up	yes	chrChr03:42643290-42649228:+	gi|571446767|ref|XP_003520772.2|	6250	0	PREDICTED: ABC transporter B family member 4-like isoform X1 [Glycine max]
Glyma.03G225300.Wm82.a2.v1	384	381	233	246.386	193	157	103	1.19054	1.25567e-06	2.45009e-05	up	yes	chrChr03:42770928-42772622:+	gi|351722873|ref|NP_001236491.1|	1146	6e-154	uncharacterized protein LOC100306030 [Glycine max]
Glyma.03G225500.Wm82.a2.v1	263	274	211	133.376	4	4	3	5.00002	4.83462e-59	2.25877e-56	up	yes	chrChr03:42786848-42791059:+	gi|356505699|ref|XP_003521627.1|	1507	0	PREDICTED: uncharacterized protein C24B11.05-like isoform X1 [Glycine max]
Glyma.03G229800.Wm82.a2.v1	24	34	24	18.1511	15	2	7	1.29055	0.00116313	0.00915245	up	yes	chrChr03:43172457-43175687:-	gi|356505761|ref|XP_003521658.1|	1797	0	PREDICTED: galactinol synthase 2 [Glycine max]
Glyma.03G233000.Wm82.a2.v1	112	90	123	80.3489	48	40	60	1.18167	2.01638e-06	3.76409e-05	up	yes	chrChr03:43383940-43388465:+	gi|356505791|ref|XP_003521673.1|	1425	0	PREDICTED: three prime repair exonuclease 2-like [Glycine max]
Glyma.03G235000.Wm82.a2.v1	332	398	338	591.892	833	905	846	-1.07194	3.98402e-14	2.64858e-12	down	yes	chrChr03:43541553-43543008:-	gi|351723903|ref|NP_001237039.1|	439	2e-50	uncharacterized protein LOC100305556 [Glycine max]
Glyma.03G236300.Wm82.a2.v1	1603	2688	967	1117	511	398	324	2.00406	9.92321e-14	6.29825e-12	up	yes	chrChr03:43613864-43620694:-	gi|356505839|ref|XP_003521697.1|	4336	0	PREDICTED: respiratory burst oxidase homolog protein B-like isoform 1 [Glycine max]
Glyma.03G237600.Wm82.a2.v1	25	22	34	53.5904	98	68	86	-1.27613	5.91782e-06	9.84518e-05	down	yes	chrChr03:43743739-43749635:+	gi|356504044|ref|XP_003520809.1|	2971	0	PREDICTED: mitogen-activated protein kinase kinase kinase NPK1-like [Glycine max]
Glyma.03G240000.Wm82.a2.v1	62	74	171	178.469	276	324	196	-1.02721	0.000589338	0.00524048	down	yes	chrChr03:43874279-43877093:+	gi|571447011|ref|XP_006577251.1|	1738	0	PREDICTED: transcription factor bHLH96-like isoform X1 [Glycine max]
Glyma.03G240700.Wm82.a2.v1	17	12	13	30.5005	57	42	49	-1.34343	3.46128e-05	0.000477972	down	yes	chrChr03:43930763-43932942:-	gi|571447031|ref|XP_006577260.1|	796	2e-101	PREDICTED: uncharacterized protein LOC100779008 [Glycine max]
Glyma.03G241600.Wm82.a2.v1	25	20	25	16.8556	10	8	11	1.06632	0.00392775	0.024609	up	yes	chrChr03:43980847-43986941:+	gi|571447038|ref|XP_006577262.1|	1477	0	PREDICTED: receptor-like cytosolic serine/threonine-protein kinase RBK2-like [Glycine max]
Glyma.03G247100.Wm82.a2.v1	366	297	498	274.581	178	199	72	1.34118	2.45063e-06	4.48513e-05	up	yes	chrChr03:44393593-44398029:+	gi|351726040|ref|NP_001237113.1|	1882	0	bZIP transcription factor bZIP105 [Glycine max]
Glyma.03G250200.Wm82.a2.v1	7	12	2	15.8666	29	19	30	-1.12978	0.00463637	0.0281014	down	yes	chrChr03:44607834-44610091:-	gi|571447182|ref|XP_006577309.1|	1989	0	PREDICTED: gelsolin-related protein of 125 kDa-like [Glycine max]
Glyma.03G251400.Wm82.a2.v1	409	506	341	251.784	69	71	57	2.66034	6.23345e-38	1.44612e-35	up	yes	chrChr03:44718734-44719931:+	gi|359806938|ref|NP_001241581.1|	1508	0	phosphoenolpyruvate carboxylase kinase [Glycine max]
Glyma.03G251600.Wm82.a2.v1	21	17	7	33.1699	77	39	46	-1.28026	0.000324617	0.00318083	down	yes	chrChr03:44735415-44736486:-	gi|571447215|ref|XP_006577322.1|	852	2e-111	PREDICTED: peptidyl-prolyl cis-trans isomerase CYP19-3 isoform X1 [Glycine max]
Glyma.03G252500.Wm82.a2.v1	11	7	18	6.34005	0	0	0	1.83472	1.22044e-05	0.000189453	up	yes	chrChr03:44819920-44825163:+	gi|356506012|ref|XP_003521782.1|	1984	0	PREDICTED: GDSL esterase/lipase LTL1-like isoform X1 [Glycine max]
Glyma.03G259800.Wm82.a2.v1	408	591	507	348.654	191	181	164	1.58256	1.30505e-18	1.31046e-16	up	yes	chrChr03:45387067-45390947:+	gi|571447330|ref|XP_003521820.2|	2433	0	PREDICTED: rho GTPase-activating protein 3-like [Glycine max]
Glyma.03G260300.Wm82.a2.v1	90	45	65	50.2404	36	31	29	1.04949	0.000471132	0.00434084	up	yes	chrChr03:45421037-45423205:+	gi|356506094|ref|XP_003521822.1|	2759	0	PREDICTED: 3-ketoacyl-CoA synthase 1-like [Glycine max]
Glyma.03G260900.Wm82.a2.v1	748	732	597	1130.71	1568	1689	1637	-1.03556	1.00352e-13	6.35733e-12	down	yes	chrChr03:45461728-45463190:+	gi|593698792|ref|XP_007149861.1|	457	5e-54	hypothetical protein PHAVU_005G104700g [Phaseolus vulgaris]
Glyma.03G261400.Wm82.a2.v1	19	10	6	31.0828	87	44	29	-1.4268	0.000184326	0.00198274	down	yes	chrChr03:45488450-45489586:+	gi|356506102|ref|XP_003521826.1|	950	1e-125	PREDICTED: protein YLS9-like [Glycine max]
Glyma.03G261800.Wm82.a2.v1	14	16	14	8.99785	2	5	1	1.43073	0.000624274	0.00549737	up	yes	chrChr03:45502100-45510812:+	gi|351727647|ref|NP_001236400.1|	3362	0	MYB transcription factor MYB114 [Glycine max]
Glyma.03G264300.Wm82.a2.v1	132	134	115	96.105	77	69	40	1.08922	1.39319e-05	0.000212541	up	yes	chrChr03:45704553-45709164:+	gi|356506132|ref|XP_003521841.1|	4663	0	PREDICTED: linoleate 13S-lipoxygenase 3-1, chloroplastic-like [Glycine max]
Glyma.04G001100.Wm82.a2.v1	33	16	24	44.5262	92	62	49	-1.07059	0.000864833	0.00720458	down	yes	chrChr04:101295-104020:+	gi|734405878|gb|KHN33647.1|	1890	0	G2/mitotic-specific cyclin-1 [Glycine soja]
Glyma.04G010600.Wm82.a2.v1	16	17	10	42.2726	121	46	56	-1.69232	1.58806e-06	3.02825e-05	down	yes	chrChr04:837361-842109:-	gi|571448649|ref|XP_006577914.1|	3016	0	PREDICTED: phosphatidylinositol/phosphatidylcholine transfer protein SFH3-like isoform X1 [Glycine max]
Glyma.04G011500.Wm82.a2.v1	7	5	3	12.9427	24	14	28	-1.25366	0.0018555	0.0133834	down	yes	chrChr04:879258-880695:-	gi|734405973|gb|KHN33742.1|	724	4e-94	hypothetical protein glysoja_013748 [Glycine soja]
Glyma.04G013500.Wm82.a2.v1	81	47	84	43.5877	16	9	15	2.09287	1.49068e-10	6.08555e-09	up	yes	chrChr04:1026930-1028650:+	gi|734405993|gb|KHN33762.1|	1053	4e-138	BURP domain-containing protein 17 [Glycine soja]
Glyma.04G015800.Wm82.a2.v1	643	640	738	471.582	246	276	219	1.56138	1.59903e-23	2.16895e-21	up	yes	chrChr04:1200696-1203552:+	gi|351725087|ref|NP_001237336.1|	728	8e-93	uncharacterized protein LOC100306344 [Glycine max]
Glyma.04G020200.Wm82.a2.v1	26	58	119	41.0058	14	13	7	1.92819	4.65563e-07	9.88081e-06	up	yes	chrChr04:1596653-1598242:+	gi|571448787|ref|XP_003523230.2|	2235	0	PREDICTED: ornithine decarboxylase [Glycine max]
Glyma.04G020400.Wm82.a2.v1	44	50	52	35.2015	29	17	15	1.18896	0.000172736	0.00187731	up	yes	chrChr04:1603209-1610515:-	gi|356509028|ref|XP_003523254.1|	4468	0	PREDICTED: phospholipase D delta-like [Glycine max]
Glyma.04G020700.Wm82.a2.v1	420	465	319	284.181	180	144	139	1.46482	4.14752e-14	2.75184e-12	up	yes	chrChr04:1629601-1631434:-	gi|351725373|ref|NP_001237090.1|	949	2e-121	syringolide-induced protein 14-1-1 [Glycine max]
Glyma.04G022100.Wm82.a2.v1	142	192	159	116.024	46	85	56	1.41554	1.37114e-08	3.94846e-07	up	yes	chrChr04:1728744-1731095:+	gi|351721722|ref|NP_001236963.1|	888	3e-115	bZIP transcription factor bZIP46 [Glycine max]
Glyma.04G025100.Wm82.a2.v1	177	156	179	126.739	61	65	108	1.18649	6.929e-07	1.42125e-05	up	yes	chrChr04:2005500-2008603:-	gi|356509634|ref|XP_003523551.1|	1112	1e-148	PREDICTED: cytokinin riboside 5'-monophosphate phosphoribohydrolase LOG3-like [Glycine max]
Glyma.04G025200.Wm82.a2.v1	14	14	14	9.10802	5	3	3	1.24358	0.00259822	0.0175894	up	yes	chrChr04:2020993-2024934:+	.	.	.	.
Glyma.04G025300.Wm82.a2.v1	357	466	473	284.766	114	123	126	1.91102	2.24066e-26	3.4575e-24	up	yes	chrChr04:2029598-2030587:+	gi|351723315|ref|NP_001235483.1|	524	1e-63	uncharacterized protein LOC100305700 [Glycine max]
Glyma.04G034900.Wm82.a2.v1	17	21	6	28.3667	43	38	51	-1.08736	0.00216585	0.0151976	down	yes	chrChr04:2787392-2790057:-	gi|356510304|ref|XP_003523879.1|	1866	0	PREDICTED: uncharacterized protein LOC100805065 [Glycine max]
Glyma.04G036300.Wm82.a2.v1	349	378	314	268.547	191	201	154	1.05325	1.56491e-09	5.37163e-08	up	yes	chrChr04:2876396-2883264:+	gi|734322471|gb|KHN04526.1|	3076	0	Mitogen-activated protein kinase kinase kinase 1 [Glycine soja]
Glyma.04G037800.Wm82.a2.v1	12	8	6	17.8496	35	29	21	-1.10819	0.00324657	0.0210804	down	yes	chrChr04:3007134-3012360:+	gi|356510383|ref|XP_003523918.1|	1149	4e-154	PREDICTED: B3 domain-containing protein At5g42700-like [Glycine max]
Glyma.04G039900.Wm82.a2.v1	84	67	181	67.1749	31	22	3	1.25357	0.00300233	0.0197681	up	yes	chrChr04:3206527-3208098:-	gi|356510448|ref|XP_003523950.1|	2500	0	PREDICTED: uncharacterized acetyltransferase At3g50280 [Glycine max]
Glyma.04G040400.Wm82.a2.v1	623	592	549	413.674	230	231	199	1.53814	1.4274e-24	2.02601e-22	up	yes	chrChr04:3227950-3229826:-	gi|734322434|gb|KHN04489.1|	2511	0	Putative acetyltransferase, partial [Glycine soja]
Glyma.04G040900.Wm82.a2.v1	51	48	39	79.5359	104	150	99	-1.06222	3.59754e-05	0.000493789	down	yes	chrChr04:3261939-3263363:-	gi|734322429|gb|KHN04484.1|	1196	2e-163	WUSCHEL-related homeobox 4 [Glycine soja]
Glyma.04G042300.Wm82.a2.v1	35	20	15	16.8711	10	12	7	1.0064	0.0093082	0.0489415	up	yes	chrChr04:3404360-3405786:+	gi|377823703|ref|NP_001235715.1|	1187	1e-159	MYB transcription factor MYB68 [Glycine max]
Glyma.04G044900.Wm82.a2.v1	1038	732	687	542.936	290	312	103	1.71375	2.00412e-09	6.76875e-08	up	yes	chrChr04:3586957-3589247:-	gi|356510542|ref|XP_003523996.1|	1095	1e-141	PREDICTED: zinc finger protein ZAT10-like [Glycine max]
Glyma.04G045600.Wm82.a2.v1	1149	1232	1153	925.375	633	653	655	1.0144	3.11015e-17	2.76779e-15	up	yes	chrChr04:3653104-3658171:+	gi|734322385|gb|KHN04440.1|	2123	0	Interferon-related developmental regulator 1 [Glycine soja]
Glyma.04G046800.Wm82.a2.v1	28	33	15	15.8688	8	6	2	1.55981	9.80908e-05	0.00116968	up	yes	chrChr04:3759193-3760217:-	gi|356510594|ref|XP_003524022.1|	818	6e-107	PREDICTED: uncharacterized protein LOC100785988 [Glycine max]
Glyma.04G048100.Wm82.a2.v1	949	1135	931	750.836	426	462	521	1.22656	3.53662e-16	2.87363e-14	up	yes	chrChr04:3882298-3887192:-	gi|356510626|ref|XP_003524038.1|	3122	0	PREDICTED: probable xyloglucan glycosyltransferase 12-like [Glycine max]
Glyma.04G048900.Wm82.a2.v1	17	24	23	13.4437	7	7	0	1.39797	0.000703613	0.00606427	up	yes	chrChr04:3961678-3963797:-	gi|356509805|ref|XP_003523636.1|	1743	0	PREDICTED: transcription factor RAX3-like [Glycine max]
Glyma.04G051000.Wm82.a2.v1	291	507	759	340.484	97	240	88	1.34383	0.000768564	0.00652707	up	yes	chrChr04:4142878-4145133:+	gi|356509817|ref|XP_003523642.1|	973	8e-130	PREDICTED: uncharacterized protein LOC100795143 [Glycine max]
Glyma.04G053100.Wm82.a2.v1	163	161	237	135.132	81	62	90	1.3215	1.23665e-08	3.60171e-07	up	yes	chrChr04:4314093-4319180:-	gi|356509828|ref|XP_003523647.1|	3572	0	PREDICTED: U-box domain-containing protein 35-like [Glycine max]
Glyma.04G055600.Wm82.a2.v1	25	11	10	32.681	45	65	47	-1.25298	0.000297578	0.00296134	down	yes	chrChr04:4492866-4496940:+	gi|593269408|ref|XP_007136881.1|	1806	0	hypothetical protein PHAVU_009G081800g [Phaseolus vulgaris]
Glyma.04G057800.Wm82.a2.v1	12	7	9	5.71813	1	3	1	1.1716	0.00553625	0.0324393	up	yes	chrChr04:4733371-4738757:+	gi|356507127|ref|XP_003522322.1|	2881	0	PREDICTED: 3-ketoacyl-CoA synthase 10-like [Glycine max]
Glyma.04G058800.Wm82.a2.v1	24	53	39	21.6344	5	2	1	2.53009	1.65255e-10	6.69761e-09	up	yes	chrChr04:4822857-4823809:+	gi|734396355|gb|KHN29651.1|	557	8e-68	hypothetical protein glysoja_016273 [Glycine soja]
Glyma.04G060600.Wm82.a2.v1	83	48	108	158.84	268	282	197	-1.31673	3.7096e-07	8.0978e-06	down	yes	chrChr04:4946984-4948216:-	gi|351721609|ref|NP_001236959.1|	766	5e-99	uncharacterized protein LOC100305551 precursor [Glycine max]
Glyma.04G060900.Wm82.a2.v1	19	13	22	10.7714	0	6	2	1.53993	0.000242785	0.00250139	up	yes	chrChr04:4966912-4970792:+	gi|571449358|ref|XP_006578115.1|	2807	0	PREDICTED: phospholipase D Y-like [Glycine max]
Glyma.04G064000.Wm82.a2.v1	18	23	28	16.5081	12	8	8	1.06804	0.00448846	0.0273627	up	yes	chrChr04:5320390-5321290:+	.	.	.	.
Glyma.04G064800.Wm82.a2.v1	57	19	24	23.2806	8	16	12	1.14916	0.00293292	0.0194099	up	yes	chrChr04:5381838-5386695:+	gi|734336077|gb|KHN08156.1|	1753	0	Calcium uptake protein 1, mitochondrial [Glycine soja]
Glyma.04G065800.Wm82.a2.v1	36	74	78	105.145	147	176	138	-1.00019	0.000158711	0.00175333	down	yes	chrChr04:5478321-5483457:-	gi|351721348|ref|NP_001237718.1|	1028	2e-137	uncharacterized protein LOC100499904 [Glycine max]
Glyma.04G066500.Wm82.a2.v1	34	42	55	32.2802	18	24	17	1.08578	0.000759631	0.0064659	up	yes	chrChr04:5539993-5542964:+	gi|356507718|ref|XP_003522611.1|	1477	0	PREDICTED: uncharacterized protein LOC100803816 isoform X1 [Glycine max]
Glyma.04G067400.Wm82.a2.v1	35	19	16	12.9547	4	0	0	2.08544	6.78719e-07	1.39301e-05	up	yes	chrChr04:5634756-5637582:+	gi|351726554|ref|NP_001235083.1|	1309	7e-177	uncharacterized protein LOC100499977 [Glycine max]
Glyma.04G069500.Wm82.a2.v1	1642	2586	2980	1736.19	1321	998	683	1.31399	2.6169e-08	7.11065e-07	up	yes	chrChr04:5792149-5797403:-	gi|571449511|ref|XP_006578164.1|	3540	0	PREDICTED: boron transporter 4-like [Glycine max]
Glyma.04G076000.Wm82.a2.v1	3963	4008	3624	2928.52	1590	2979	1097	1.07712	2.85622e-05	0.000402853	up	yes	chrChr04:6359008-6360568:-	gi|255644870|gb|ACU22935.1|	1030	4e-136	unknown [Glycine max]
Glyma.04G076900.Wm82.a2.v1	2336	2148	2307	1246.89	83	130	115	4.34733	7.25721e-144	1.28487e-140	up	yes	chrChr04:6467994-6471180:-	gi|356507842|ref|XP_003522672.1|	2070	0	PREDICTED: probable nucleoredoxin 3-like [Glycine max]
Glyma.04G079200.Wm82.a2.v1	29961	34925	37262	24557.1	11396	18297	12348	1.37503	1.71001e-13	1.06131e-11	up	yes	chrChr04:6629093-6630377:+	gi|255632326|gb|ACU16521.1|	924	1e-122	unknown [Glycine max]
Glyma.04G080600.Wm82.a2.v1	115	81	120	177.746	300	238	244	-1.06167	2.60974e-07	5.90773e-06	down	yes	chrChr04:6773967-6780762:+	gi|356507885|ref|XP_003522693.1|	5082	0	PREDICTED: myb-related protein 3R-1-like isoform X1 [Glycine max]
Glyma.04G084100.Wm82.a2.v1	496	624	556	338.548	75	102	102	2.61671	1.75131e-45	4.99256e-43	up	yes	chrChr04:7132409-7136777:+	gi|571449734|ref|XP_003522713.2|	3007	0	PREDICTED: carotenoid cleavage dioxygenase 8 homolog B, chloroplastic-like [Glycine max]
Glyma.04G086700.Wm82.a2.v1	33	34	21	19.2504	6	12	6	1.46757	9.891e-05	0.00117737	up	yes	chrChr04:7393180-7396717:+	gi|356510053|ref|XP_003523755.1|	5033	0	PREDICTED: receptor-like protein kinase HSL1-like [Glycine max]
Glyma.04G087000.Wm82.a2.v1	21	34	22	49.2144	60	77	91	-1.19581	5.22246e-05	0.000682431	down	yes	chrChr04:7429156-7433574:-	gi|356510055|ref|XP_003523756.1|	1314	6e-177	PREDICTED: uncharacterized protein LOC100782614 [Glycine max]
Glyma.04G090800.Wm82.a2.v1	13	20	14	8.42436	0	1	0	2.10161	6.59944e-07	1.35862e-05	up	yes	chrChr04:7993767-7994541:-	gi|734336504|gb|KHN08230.1|	436	2e-51	hypothetical protein glysoja_017708 [Glycine soja]
Glyma.04G098800.Wm82.a2.v1	9	12	13	24.8733	48	40	33	-1.30483	0.000147938	0.00165331	down	yes	chrChr04:8991016-8991869:-	gi|356508062|ref|XP_003522780.1|	965	3e-129	PREDICTED: uncharacterized protein LOC100807016 [Glycine max]
Glyma.04G099600.Wm82.a2.v1	211	203	148	134.729	79	85	65	1.35893	7.0386e-10	2.5764e-08	up	yes	chrChr04:9115245-9116947:+	gi|356510163|ref|XP_003523809.1|	709	1e-85	PREDICTED: extensin-like [Glycine max]
Glyma.04G104400.Wm82.a2.v1	9	4	9	15.9071	29	29	19	-1.13841	0.00318781	0.0207584	down	yes	chrChr04:9885009-9889282:+	gi|734372163|gb|KHN19739.1|	1585	0	Random slug protein 5 [Glycine soja]
Glyma.04G104500.Wm82.a2.v1	328	224	272	212.273	167	131	132	1.04488	2.09704e-07	4.81189e-06	up	yes	chrChr04:9889485-9893413:-	gi|571450074|ref|XP_006578328.1|	1932	0	PREDICTED: phosphoglycerate mutase-like isoform X1 [Glycine max]
Glyma.04G127900.Wm82.a2.v1	74	87	55	54.8499	48	28	32	1.01525	0.00043024	0.00401243	up	yes	chrChr04:17508855-17512554:+	gi|356510395|ref|XP_003523924.1|	1914	0	PREDICTED: WAT1-related protein At5g07050-like [Glycine max]
Glyma.04G136200.Wm82.a2.v1	147	160	35	76.1214	40	34	28	1.4697	3.72825e-05	0.000509195	up	yes	chrChr04:20328287-20329205:+	gi|734376244|gb|KHN21326.1|	659	1e-83	Putative calcium-binding protein CML19 [Glycine soja]
Glyma.04G137200.Wm82.a2.v1	111	60	81	60.3481	35	36	31	1.28457	6.20506e-06	0.000102773	up	yes	chrChr04:20927240-20927923:-	gi|734343899|gb|KHN10370.1|	232	1e-22	hypothetical protein glysoja_045478 [Glycine soja]
Glyma.04G142400.Wm82.a2.v1	177	127	92	83.5104	31	33	24	2.03884	4.86966e-13	2.86883e-11	up	yes	chrChr04:24911051-24912334:+	gi|571488793|ref|XP_003538058.2|	1184	2e-158	PREDICTED: uncharacterized protein LOC100799023 [Glycine max]
Glyma.04G142700.Wm82.a2.v1	69	63	59	46.4034	38	17	27	1.18756	7.4238e-05	0.000919136	up	yes	chrChr04:24964360-24969309:+	gi|356545223|ref|XP_003541044.1|	4898	0	PREDICTED: cellulose synthase A catalytic subunit 7 [UDP-forming]-like [Glycine max]
Glyma.04G147600.Wm82.a2.v1	2251	2677	2330	1321.2	59	120	102	4.54579	8.57259e-108	9.01167e-105	up	yes	chrChr04:29849735-29853236:+	gi|356508327|ref|XP_003522909.1|	1297	2e-175	PREDICTED: SPX domain-containing protein 2-like isoform 1 [Glycine max]
Glyma.04G152100.Wm82.a2.v1	81	62	86	147.625	310	204	174	-1.28211	1.51353e-07	3.55047e-06	down	yes	chrChr04:33958086-33960897:-	gi|571450523|ref|XP_006578454.1|	2586	0	PREDICTED: glucan endo-1,3-beta-glucosidase 8-like [Glycine max]
Glyma.04G157800.Wm82.a2.v1	386	444	529	252.603	28	37	21	3.81282	8.16964e-63	4.16392e-60	up	yes	chrChr04:38302988-38320311:+	gi|571450700|ref|XP_006578507.1|	649	2e-80	PREDICTED: uncharacterized protein LOC100806110 isoform X2 [Glycine max]
Glyma.04G180400.Wm82.a2.v1	16115	15523	14467	11484.6	6037	6217	9289	1.21166	4.6862e-12	2.41408e-10	up	yes	chrChr04:44623575-44628878:-	gi|571451063|ref|XP_006578620.1|	2954	0	PREDICTED: BURP domain-containing protein 9-like [Glycine max]
Glyma.04G180800.Wm82.a2.v1	227	237	166	140.65	52	96	42	1.67448	7.36972e-10	2.68011e-08	up	yes	chrChr04:44663639-44664908:-	gi|356508655|ref|XP_003523070.1|	809	5e-104	PREDICTED: uncharacterized protein LOC100787218 [Glycine max]
Glyma.04G182600.Wm82.a2.v1	23	34	29	19.6349	18	6	5	1.21508	0.00166738	0.012284	up	yes	chrChr04:44874555-44876440:+	gi|356508667|ref|XP_003523076.1|	1004	5e-135	PREDICTED: uncharacterized protein LOC100790403 [Glycine max]
Glyma.04G187700.Wm82.a2.v1	296	434	340	220.295	57	82	66	2.37417	2.42462e-28	3.97863e-26	up	yes	chrChr04:45854481-45857173:+	gi|356507288|ref|XP_003522400.1|	803	6e-98	PREDICTED: uncharacterized protein LOC100810563 [Glycine max]
Glyma.04G195200.Wm82.a2.v1	224	209	425	174.487	46	56	48	2.37755	7.95066e-19	8.10461e-17	up	yes	chrChr04:46709342-46712260:+	gi|734402135|gb|KHN31900.1|	2665	0	SWI/SNF complex component SNF12 like [Glycine soja]
Glyma.04G195300.Wm82.a2.v1	403	355	308	274.837	171	235	151	1.03879	3.23634e-07	7.16704e-06	up	yes	chrChr04:46720462-46724058:+	gi|356508802|ref|XP_003523143.1|	2068	0	PREDICTED: SNF1-related protein kinase regulatory subunit gamma-1-like [Glycine max]
Glyma.04G200700.Wm82.a2.v1	63	86	55	174.985	283	273	334	-1.82316	5.36088e-18	5.0942e-16	down	yes	chrChr04:47349720-47352523:+	gi|734400174|gb|KHN31260.1|	1303	2e-177	rRNA 2'-O-methyltransferase fibrillarin 2 [Glycine soja]
Glyma.04G207400.Wm82.a2.v1	14	20	9	28.0064	55	41	35	-1.12878	0.00105091	0.00846539	down	yes	chrChr04:48000899-48002024:-	gi|147768008|emb|CAN60610.1|	185	2e-27	hypothetical protein VITISV_003923 [Vitis vinifera]
Glyma.04G207800.Wm82.a2.v1	100	66	59	51.8235	29	27	22	1.45782	7.65403e-07	1.56045e-05	up	yes	chrChr04:48023281-48029971:-	gi|356507431|ref|XP_003522470.1|	3231	0	PREDICTED: fatty acid amide hydrolase-like [Glycine max]
Glyma.04G208300.Wm82.a2.v1	782	601	511	437.084	272	236	155	1.56429	1.21274e-12	6.78793e-11	up	yes	chrChr04:48062886-48064803:-	gi|356508929|ref|XP_003523205.1|	1565	0	PREDICTED: NAC domain-containing protein 2 [Glycine max]
Glyma.04G213900.Wm82.a2.v1	5	23	68	19.219	5	3	7	1.46906	0.000488953	0.00447075	up	yes	chrChr04:48558152-48562318:+	gi|356508983|ref|XP_003523232.1|	1875	0	PREDICTED: alcohol dehydrogenase-like [Glycine max]
Glyma.04G214900.Wm82.a2.v1	54	68	41	39.7898	18	24	29	1.14691	0.000223315	0.00232645	up	yes	chrChr04:48638122-48646900:-	gi|356507482|ref|XP_003522494.1|	3232	0	PREDICTED: uncharacterized protein LOC100780979 isoform X1 [Glycine max]
Glyma.04G215600.Wm82.a2.v1	49	70	51	40.5226	27	24	17	1.26433	3.12102e-05	0.000436359	up	yes	chrChr04:48701372-48703052:+	gi|571451657|ref|XP_006578803.1|	1071	1e-140	PREDICTED: RING-H2 finger protein ATL78-like [Glycine max]
Glyma.04G223600.Wm82.a2.v1	53	42	54	84.47	131	87	155	-1.02669	8.71681e-05	0.00105591	down	yes	chrChr04:49416553-49419555:-	gi|356509092|ref|XP_003523286.1|	1935	0	PREDICTED: tropomyosin-like isoform X1 [Glycine max]
Glyma.04G223700.Wm82.a2.v1	300	372	323	223.865	104	129	79	1.72737	3.72251e-17	3.2953e-15	up	yes	chrChr04:49431083-49434445:+	gi|356509098|ref|XP_003523289.1|	1327	0	PREDICTED: methylesterase 17 isoformX1 [Glycine max]
Glyma.04G226100.Wm82.a2.v1	4	15	10	21.1542	46	27	30	-1.18541	0.00175779	0.0128126	down	yes	chrChr04:49592984-49595506:+	gi|356507536|ref|XP_003522520.1|	2259	0	PREDICTED: UNC93-like protein 1-like [Glycine max]
Glyma.04G227900.Wm82.a2.v1	93	91	100	171.993	264	221	296	-1.21618	2.87194e-10	1.12861e-08	down	yes	chrChr04:49711251-49720745:-	gi|571451857|ref|XP_006578869.1|	1821	0	PREDICTED: naringenin,2-oxoglutarate 3-dioxygenase-like [Glycine max]
Glyma.04G232800.Wm82.a2.v1	46	53	80	44.5956	37	20	27	1.05865	0.000684832	0.0059328	up	yes	chrChr04:50115230-50117431:+	.	.	.	.
Glyma.04G246600.Wm82.a2.v1	25	11	19	32.6831	45	53	49	-1.01725	0.00182062	0.0131906	down	yes	chrChr04:51404640-51407809:-	gi|351723701|ref|NP_001237800.1|	2346	0	mitotic cyclin a2-type [Glycine max]
Glyma.04G246900.Wm82.a2.v1	14	10	8	20.6451	33	38	25	-1.06794	0.00311732	0.0203975	down	yes	chrChr04:51419775-51420848:+	gi|571453035|ref|XP_006579333.1|	590	5e-72	PREDICTED: uncharacterized protein LOC102661655 [Glycine max]
Glyma.04G249700.Wm82.a2.v1	127	135	134	98.5569	73	41	71	1.15769	1.54122e-06	2.94575e-05	up	yes	chrChr04:51627709-51629519:+	gi|356509413|ref|XP_003523444.1|	790	1e-99	PREDICTED: photosystem II 22 kDa protein, chloroplastic-like [Glycine max]
Glyma.04G250600.Wm82.a2.v1	25	21	9	10.3091	2	1	1	1.9179	5.06349e-06	8.55311e-05	up	yes	chrChr04:51707047-51711602:-	gi|358248826|ref|NP_001240202.1|	2000	0	uncharacterized protein LOC100811114 [Glycine max]
Glyma.04G253000.Wm82.a2.v1	1226	1326	1205	954.309	643	575	658	1.14681	1.37865e-19	1.49601e-17	up	yes	chrChr04:51964209-51970378:+	gi|356509456|ref|XP_003523465.1|	3839	0	PREDICTED: oxysterol-binding protein-related protein 1C-like isoform X1 [Glycine max]
Glyma.05G001500.Wm82.a2.v1	77	94	60	49.4174	15	27	14	1.85117	2.43073e-09	8.1038e-08	up	yes	chrChr05:111150-112081:+	gi|356513983|ref|XP_003525687.1|	820	2e-107	PREDICTED: uncharacterized protein LOC100783889 [Glycine max]
Glyma.05G002200.Wm82.a2.v1	33	9	18	44.0619	70	95	49	-1.28682	0.000254157	0.00260182	down	yes	chrChr05:170548-171363:+	gi|356511710|ref|XP_003524566.1|	514	7e-63	PREDICTED: probable non-specific lipid-transfer protein AKCS9-like [Glycine max]
Glyma.05G003900.Wm82.a2.v1	976	1159	1071	798.377	584	246	672	1.13592	1.09096e-05	0.00017125	up	yes	chrChr05:307461-312091:+	gi|356511694|ref|XP_003524558.1|	3927	0	PREDICTED: galactinol--sucrose galactosyltransferase-like [Glycine max]
Glyma.05G007000.Wm82.a2.v1	38	21	26	17.4613	11	2	3	1.64721	4.19469e-05	0.000564235	up	yes	chrChr05:672089-673457:+	gi|571454347|ref|XP_006579758.1|	1175	2e-157	PREDICTED: uncharacterized protein LOC102667078 [Glycine max]
Glyma.05G007700.Wm82.a2.v1	23	12	17	39.9175	72	50	75	-1.44881	4.62575e-06	7.87079e-05	down	yes	chrChr05:724769-728554:+	gi|356511662|ref|XP_003524542.1|	2023	0	PREDICTED: GDSL esterase/lipase At5g14450-like [Glycine max]
Glyma.05G011200.Wm82.a2.v1	58	89	73	55.7391	39	49	21	1.00308	0.000941944	0.00773396	up	yes	chrChr05:981446-982115:+	gi|255630230|gb|ACU15470.1|	292	1e-30	unknown [Glycine max]
Glyma.05G011900.Wm82.a2.v1	85	30	29	32.8964	15	8	25	1.23495	0.00134605	0.0103402	up	yes	chrChr05:1081225-1092755:-	gi|356511619|ref|XP_003524521.1|	7093	0	PREDICTED: ABC transporter G family member 32-like isoformX1 [Glycine max]
Glyma.05G012600.Wm82.a2.v1	24	25	40	55.9625	92	79	87	-1.19742	1.38739e-05	0.000211946	down	yes	chrChr05:1179295-1185153:-	gi|571454263|ref|XP_003524517.2|	3810	0	PREDICTED: uncharacterized protein LOC100813278 [Glycine max]
Glyma.05G018700.Wm82.a2.v1	95	56	56	51.2941	36	17	42	1.06644	0.000971121	0.0079194	up	yes	chrChr05:1637723-1642184:-	gi|356513862|ref|XP_003525627.1|	3013	0	PREDICTED: protein GAMETE EXPRESSED 1-like [Glycine max]
Glyma.05G020500.Wm82.a2.v1	698	734	854	524.482	331	210	242	1.63433	5.03512e-19	5.21158e-17	up	yes	chrChr05:1830961-1835158:+	gi|359807255|ref|NP_001241112.1|	2048	0	uncharacterized protein LOC100778145 precursor [Glycine max]
Glyma.05G025900.Wm82.a2.v1	76	94	121	65.6912	48	27	18	1.53113	6.51105e-07	1.34203e-05	up	yes	chrChr05:2261858-2264672:-	gi|356512105|ref|XP_003524761.1|	2218	0	PREDICTED: cyclic dof factor 3-like [Glycine max]
Glyma.05G026100.Wm82.a2.v1	268	76	128	103.421	47	43	39	1.66522	3.81249e-07	8.2955e-06	up	yes	chrChr05:2276426-2278856:-	gi|734437687|gb|KHN48691.1|	1886	0	GDSL esterase/lipase [Glycine soja]
Glyma.05G040900.Wm82.a2.v1	293	281	290	474.182	689	678	694	-1.05479	2.81612e-15	2.08201e-13	down	yes	chrChr05:3685657-3687817:-	gi|351727711|ref|NP_001237682.1|	759	1e-97	uncharacterized protein LOC100527293 [Glycine max]
Glyma.05G041500.Wm82.a2.v1	8	12	15	7.40891	3	5	0	1.1004	0.0092491	0.0487055	up	yes	chrChr05:3728813-3729629:+	gi|734407549|gb|KHN34355.1|	252	4e-31	hypothetical protein glysoja_016683 [Glycine soja]
Glyma.05G045800.Wm82.a2.v1	48	43	13	23.3042	12	5	15	1.25503	0.00151139	0.0113638	up	yes	chrChr05:4077294-4078732:-	gi|571453739|ref|XP_006579592.1|	1319	1e-178	PREDICTED: uncharacterized protein LOC102662292 [Glycine max]
Glyma.05G047100.Wm82.a2.v1	14	71	49	31.0394	18	25	5	1.0646	0.00827123	0.0446607	up	yes	chrChr05:4188663-4189517:+	gi|571453757|ref|XP_006579596.1|	697	1e-89	PREDICTED: putative calcium-binding protein CML19-like [Glycine max]
Glyma.05G049300.Wm82.a2.v1	58	39	41	90.9034	186	114	127	-1.29815	6.74394e-07	1.38582e-05	down	yes	chrChr05:4398234-4401872:+	gi|356514060|ref|XP_003525725.1|	3250	0	PREDICTED: scarecrow-like protein 28-like isoform X1 [Glycine max]
Glyma.05G052700.Wm82.a2.v1	34	44	52	74.4572	101	101	128	-1.05722	2.67226e-05	0.000380254	down	yes	chrChr05:4724536-4728536:+	gi|356514131|ref|XP_003525760.1|	3355	0	PREDICTED: probable leucine-rich repeat receptor-like protein kinase At2g33170-like [Glycine max]
Glyma.05G054900.Wm82.a2.v1	134	153	176	112.733	66	64	70	1.28823	1.38869e-09	4.82087e-08	up	yes	chrChr05:4992570-4995871:+	gi|571453865|ref|XP_003525788.2|	1578	0	PREDICTED: nudix hydrolase 14, chloroplastic-like [Glycine max]
Glyma.05G055700.Wm82.a2.v1	1143	1625	1424	1086.08	703	781	746	1.04195	3.48197e-11	1.59795e-09	up	yes	chrChr05:5050728-5055325:+	gi|571453325|ref|XP_006579475.1|	2603	0	PREDICTED: seed maturation protein PM40 isoform X1 [Glycine max]
Glyma.05G057000.Wm82.a2.v1	106	128	234	313.855	403	609	467	-1.33691	2.01048e-07	4.62274e-06	down	yes	chrChr05:5275888-5276788:-	gi|351721960|ref|NP_001237995.1|	479	1e-56	uncharacterized protein LOC100305616 precursor [Glycine max]
Glyma.05G058300.Wm82.a2.v1	762	876	1035	681.493	433	519	398	1.10737	6.63867e-11	2.87781e-09	up	yes	chrChr05:5404365-5407765:-	gi|571453309|ref|XP_006579467.1|	619	2e-76	PREDICTED: uncharacterized protein LOC100818620 isoform X1 [Glycine max]
Glyma.05G059600.Wm82.a2.v1	199	194	159	308.244	475	443	433	-1.07707	2.15687e-11	1.02915e-09	down	yes	chrChr05:5566893-5567822:-	gi|731319968|ref|XP_010670553.1|	257	1e-25	PREDICTED: 40S ribosomal protein S30 [Beta vulgaris subsp. vulgaris]
Glyma.05G063000.Wm82.a2.v1	1800	1687	2381	1127.41	192	225	187	3.29763	3.96696e-80	2.66889e-77	up	yes	chrChr05:5984515-5991318:-	gi|356510672|ref|XP_003524060.1|	1048	2e-138	PREDICTED: uncharacterized LOC100306242 isoform X1 [Glycine max]
Glyma.05G063100.Wm82.a2.v1	148	142	253	132.378	110	72	54	1.2061	1.44577e-05	0.000219965	up	yes	chrChr05:5996692-5999703:-	gi|734427243|gb|KHN44097.1|	1726	0	Nudix hydrolase 8 [Glycine soja]
Glyma.05G063500.Wm82.a2.v1	1203	1068	830	775.548	665	556	250	1.11534	2.0787e-05	0.000302577	up	yes	chrChr05:6132703-6134032:-	gi|356510689|ref|XP_003524068.1|	1025	8e-135	PREDICTED: ethylene-responsive transcription factor 5 [Glycine max]
Glyma.05G066600.Wm82.a2.v1	13	16	17	31.2828	34	67	47	-1.20956	0.000348926	0.00337188	down	yes	chrChr05:6629317-6634642:+	gi|356513779|ref|XP_003525587.1|	2813	0	PREDICTED: cationic amino acid transporter 6, chloroplastic-like [Glycine max]
Glyma.05G077700.Wm82.a2.v1	104	223	261	349.81	512	729	334	-1.08334	0.000179185	0.00193565	down	yes	chrChr05:10106352-10108849:+	gi|356514107|ref|XP_003525748.1|	2126	0	PREDICTED: F-box/kelch-repeat protein At3g27150-like [Glycine max]
Glyma.05G081700.Wm82.a2.v1	2	9	16	30.9138	85	42	41	-1.70343	1.02955e-05	0.000162444	down	yes	chrChr05:12551751-12553309:+	gi|356565653|ref|XP_003551053.1|	368	3e-39	PREDICTED: two-component response regulator-like APRR2-like isoform X1 [Glycine max]
Glyma.05G082500.Wm82.a2.v1	437	739	348	384.046	271	248	224	1.10299	3.38185e-06	5.94554e-05	up	yes	chrChr05:13080936-13086698:-	gi|571454745|ref|XP_006579882.1|	4173	0	PREDICTED: probable disease resistance protein At5g66900-like [Glycine max]
Glyma.05G085200.Wm82.a2.v1	87	99	52	134.094	208	220	162	-1.03345	2.34686e-05	0.00033781	down	yes	chrChr05:15489208-15492400:-	gi|571454723|ref|XP_003524630.2|	1043	3e-131	PREDICTED: calmodulin-like protein 1-like [Glycine max]
Glyma.05G092200.Wm82.a2.v1	77	114	97	73.4889	38	38	70	1.0044	0.000350432	0.00338305	up	yes	chrChr05:22253623-22254333:-	gi|734420576|gb|KHN40929.1|	583	2e-73	hypothetical protein glysoja_050201 [Glycine soja]
Glyma.05G099700.Wm82.a2.v1	97	84	62	56.9957	38	34	19	1.36205	3.97824e-06	6.86982e-05	up	yes	chrChr05:26426978-26427735:+	gi|734317512|gb|KHN02633.1|	313	3e-33	hypothetical protein glysoja_040457 [Glycine soja]
Glyma.05G102800.Wm82.a2.v1	257	203	397	174.422	72	37	42	2.35124	1.53211e-17	1.39671e-15	up	yes	chrChr05:27200175-27201981:-	gi|356511933|ref|XP_003524676.1|	1449	0	PREDICTED: probable esterase D14L-like [Glycine max]
Glyma.05G108500.Wm82.a2.v1	21	14	10	7.92823	0	0	0	2.12087	5.1898e-07	1.08976e-05	up	yes	chrChr05:28764842-28766505:+	gi|356514360|ref|XP_003525874.1|	1333	0	PREDICTED: NADPH-dependent 1-acyldihydroxyacetone phosphate reductase-like [Glycine max]
Glyma.05G119200.Wm82.a2.v1	802	410	346	338.886	204	154	54	1.3293	0.00105661	0.00850117	up	yes	chrChr05:31210649-31211501:+	gi|359807566|ref|NP_001241410.1|	919	1e-122	uncharacterized protein LOC100811478 [Glycine max]
Glyma.05G125300.Wm82.a2.v1	78	87	87	44.6571	2	0	0	4.22869	6.51865e-30	1.16951e-27	up	yes	chrChr05:31860646-31861979:+	.	.	.	.
Glyma.05G127500.Wm82.a2.v1	111	136	100	89.4968	57	50	75	1.00327	3.27304e-05	0.000454778	up	yes	chrChr05:32041345-32049554:+	gi|734388750|gb|KHN25874.1|	1936	0	Putative calcium-activated outward-rectifying potassium channel 6 [Glycine soja]
Glyma.05G128200.Wm82.a2.v1	121	192	97	98.6739	60	64	46	1.27264	2.61106e-06	4.75033e-05	up	yes	chrChr05:32158034-32162343:-	gi|356510778|ref|XP_003524111.1|	5729	0	PREDICTED: LRR receptor-like serine/threonine-protein kinase FLS2-like [Glycine max]
Glyma.05G133400.Wm82.a2.v1	263	286	262	457.564	696	652	667	-1.11057	4.54663e-16	3.63287e-14	down	yes	chrChr05:32639275-32645811:+	gi|356512221|ref|XP_003524819.1|	2345	0	PREDICTED: polygalacturonase At1g48100 [Glycine max]
Glyma.05G136300.Wm82.a2.v1	363	361	282	207.998	78	64	56	2.36203	2.31616e-31	4.37716e-29	up	yes	chrChr05:32861694-32867327:+	gi|356510827|ref|XP_003524135.1|	3022	0	PREDICTED: peptide transporter PTR2-like isoform X1 [Glycine max]
Glyma.05G138100.Wm82.a2.v1	55	47	90	44.2547	28	19	20	1.40289	9.55117e-06	0.000152127	up	yes	chrChr05:33054280-33058277:-	gi|356512277|ref|XP_003524847.1|	2347	0	PREDICTED: type I inositol 1,4,5-trisphosphate 5-phosphatase CVP2-like [Glycine max]
Glyma.05G138400.Wm82.a2.v1	909	856	1017	541.227	146	114	70	3.0255	1.05986e-45	3.04724e-43	up	yes	chrChr05:33079962-33085524:+	gi|359806222|ref|NP_001241208.1|	1795	0	uncharacterized protein LOC100818610 precursor [Glycine max]
Glyma.05G139500.Wm82.a2.v1	121	165	91	95.7741	43	82	63	1.02651	0.000226829	0.00235867	up	yes	chrChr05:33196400-33200842:-	gi|356510843|ref|XP_003524143.1|	1936	0	PREDICTED: cysteine-rich receptor-like protein kinase 10-like [Glycine max]
Glyma.05G140600.Wm82.a2.v1	660	599	734	512.126	314	393	324	1.07954	1.85634e-11	8.90805e-10	up	yes	chrChr05:33351680-33353411:-	gi|351720787|ref|NP_001236932.1|	704	1e-89	uncharacterized protein LOC100499853 [Glycine max]
Glyma.05G146800.Wm82.a2.v1	561	561	525	895.766	1208	1331	1336	-1.03844	4.46099e-16	3.58146e-14	down	yes	chrChr05:34062669-34065648:-	gi|351723205|ref|NP_001235991.1|	889	6e-118	uncharacterized protein LOC100499784 [Glycine max]
Glyma.05G147100.Wm82.a2.v1	560	576	313	326.44	125	194	137	1.66994	6.41061e-12	3.24769e-10	up	yes	chrChr05:34110351-34112934:+	gi|356510893|ref|XP_003524168.1|	2594	0	PREDICTED: cytochrome P450 78A5-like [Glycine max]
Glyma.05G150100.Wm82.a2.v1	238	203	58	119.919	77	86	42	1.14695	0.000886787	0.00737287	up	yes	chrChr05:34406314-34406846:+	gi|734350416|gb|KHN12363.1|	334	2e-37	hypothetical protein glysoja_018493 [Glycine soja]
Glyma.05G155600.Wm82.a2.v1	619	686	282	334.049	81	209	59	1.44557	0.00042012	0.00393332	up	yes	chrChr05:34850340-34852013:+	gi|356512487|ref|XP_003524950.1|	1982	0	PREDICTED: F-box/kelch-repeat protein At1g15670-like [Glycine max]
Glyma.05G156100.Wm82.a2.v1	218	242	230	417.467	623	640	631	-1.24898	5.96934e-19	6.14075e-17	down	yes	chrChr05:34874029-34876441:+	gi|571490022|ref|XP_003538445.2|	664	2e-83	PREDICTED: 60S ribosomal protein L32-1-like [Glycine max]
Glyma.05G160300.Wm82.a2.v1	426	435	483	328.621	195	200	194	1.31656	3.12212e-18	3.05305e-16	up	yes	chrChr05:35199525-35209392:+	gi|356512521|ref|XP_003524967.1|	1635	0	PREDICTED: uncharacterized protein LOC100792185 isoform X1 [Glycine max]
Glyma.05G160500.Wm82.a2.v1	494	439	448	288.705	133	110	49	2.16751	2.43245e-17	2.1937e-15	up	yes	chrChr05:35214080-35215827:-	gi|356512523|ref|XP_003524968.1|	1047	2e-139	PREDICTED: uncharacterized protein LOC100792716 [Glycine max]
Glyma.05G161700.Wm82.a2.v1	449	400	355	303.472	220	168	198	1.15839	2.5711e-11	1.21133e-09	up	yes	chrChr05:35312249-35317932:-	gi|734329772|gb|KHN06427.1|	1084	4e-144	ER lumen protein retaining receptor [Glycine soja]
Glyma.05G163100.Wm82.a2.v1	827	947	971	645.318	296	404	337	1.51385	1.05008e-20	1.23942e-18	up	yes	chrChr05:35423374-35424770:+	gi|356512549|ref|XP_003524981.1|	964	4e-127	PREDICTED: cyclic phosphodiesterase-like [Glycine max]
Glyma.05G165600.Wm82.a2.v1	112	88	68	66.5667	43	35	46	1.13823	2.20092e-05	0.00031885	up	yes	chrChr05:35616883-35621136:-	gi|571455849|ref|XP_006580204.1|	4792	0	PREDICTED: disease resistance protein At4g27190-like isoform X1 [Glycine max]
Glyma.05G175800.Wm82.a2.v1	55	70	51	43.3253	24	32	23	1.14121	9.26218e-05	0.00111116	up	yes	chrChr05:36484283-36484991:+	gi|356512674|ref|XP_003525042.1|	576	4e-72	PREDICTED: uncharacterized protein LOC100787601 [Glycine max]
Glyma.05G178200.Wm82.a2.v1	1509	2201	1262	1113.66	566	482	483	1.7641	2.30232e-19	2.47437e-17	up	yes	chrChr05:36640053-36648121:-	gi|571456056|ref|XP_006580273.1|	5798	0	PREDICTED: calmodulin-binding transcription activator 3-like isoform X2 [Glycine max]
Glyma.05G180100.Wm82.a2.v1	1830	1617	1737	1348.12	985	921	881	1.04443	2.61693e-17	2.33504e-15	up	yes	chrChr05:36825976-36832570:+	gi|356512717|ref|XP_003525063.1|	3655	0	PREDICTED: acyl-coenzyme A oxidase 2, peroxisomal-like [Glycine max]
Glyma.05G180700.Wm82.a2.v1	101	113	120	66.4458	16	23	10	2.53842	6.65314e-19	6.82332e-17	up	yes	chrChr05:36885298-36888026:-	gi|356511109|ref|XP_003524272.1|	2695	0	PREDICTED: probable glucan 1,3-beta-glucosidase A-like [Glycine max]
Glyma.05G193900.Wm82.a2.v1	88	58	44	33.7859	1	0	1	3.69088	3.8223e-21	4.70983e-19	up	yes	chrChr05:37862956-37871726:+	gi|571457762|ref|XP_006580878.1|	4002	0	PREDICTED: DNA excision repair protein ERCC-6-like [Glycine max]
Glyma.05G196300.Wm82.a2.v1	105	72	90	60.4951	21	34	31	1.57708	1.70002e-08	4.80186e-07	up	yes	chrChr05:38053568-38054664:-	gi|351721577|ref|NP_001236702.1|	402	5e-45	uncharacterized protein LOC100306557 [Glycine max]
Glyma.05G199400.Wm82.a2.v1	409	417	418	289.174	143	168	138	1.57872	1.56397e-22	2.05509e-20	up	yes	chrChr05:38331175-38334890:-	gi|571456408|ref|XP_003524327.2|	2518	0	PREDICTED: calcium-binding mitochondrial carrier protein SCaMC-2-like isoform X1 [Glycine max]
Glyma.05G202200.Wm82.a2.v1	19	14	16	11.284	7	6	4	1.10223	0.00603406	0.0347985	up	yes	chrChr05:38578626-38580206:-	gi|571457195|ref|XP_006580619.1|	1142	8e-153	PREDICTED: gelsolin-related protein of 125 kDa-like [Glycine max]
Glyma.05G206200.Wm82.a2.v1	43	29	22	18.5902	5	4	4	2.04375	1.36195e-07	3.22866e-06	up	yes	chrChr05:38904753-38908922:-	gi|593794011|ref|XP_007160044.1|	1068	1e-142	hypothetical protein PHAVU_002G287800g [Phaseolus vulgaris]
Glyma.05G208900.Wm82.a2.v1	5	9	5	21.8971	55	36	28	-1.76577	2.6847e-06	4.85803e-05	down	yes	chrChr05:39081854-39084779:-	gi|356513377|ref|XP_003525390.1|	2752	0	PREDICTED: cytochrome P450 86A8 [Glycine max]
Glyma.05G209400.Wm82.a2.v1	380	373	423	273.769	134	150	143	1.56967	5.33876e-22	6.80267e-20	up	yes	chrChr05:39137625-39140988:-	gi|356513371|ref|XP_003525387.1|	843	9e-110	PREDICTED: ubiquitin-conjugating enzyme E2 5-like isoform X1 [Glycine max]
Glyma.05G215000.Wm82.a2.v1	22	23	24	15.905	5	10	9	1.21032	0.00141437	0.0107594	up	yes	chrChr05:39581387-39586460:+	gi|571457813|ref|XP_006580899.1|	3554	0	PREDICTED: myosin-9-like [Glycine max]
Glyma.05G215500.Wm82.a2.v1	38	22	51	65.7872	112	104	80	-1.07226	0.000215556	0.00226243	down	yes	chrChr05:39615259-39617763:+	gi|356513291|ref|XP_003525347.1|	1496	0	PREDICTED: high mobility group B protein 6-like [Glycine max]
Glyma.05G215700.Wm82.a2.v1	44	43	29	27.1352	19	19	5	1.19483	0.00112958	0.00894704	up	yes	chrChr05:39631374-39632117:+	gi|571456951|ref|XP_006580532.1|	764	6e-100	PREDICTED: uncharacterized protein LOC102670105 [Glycine max]
Glyma.05G215900.Wm82.a2.v1	981	889	449	517.904	255	302	144	1.67114	1.03452e-09	3.65416e-08	up	yes	chrChr05:39636109-39638136:-	gi|356513295|ref|XP_003525349.1|	1963	0	PREDICTED: probable WRKY transcription factor 53-like [Glycine max]
Glyma.05G216300.Wm82.a2.v1	6	0	3	12.3361	35	16	18	-1.49712	0.000343487	0.0033308	down	yes	chrChr05:39653906-39654935:-	gi|571456946|ref|XP_006580530.1|	492	8e-60	PREDICTED: uncharacterized protein LOC102669617 [Glycine max]
Glyma.05G218300.Wm82.a2.v1	10	10	10	21.4989	49	34	21	-1.19466	0.00122343	0.00953544	down	yes	chrChr05:39815332-39816619:-	gi|571456904|ref|XP_006580515.1|	1021	8e-136	PREDICTED: uncharacterized protein LOC102666704 [Glycine max]
Glyma.05G224400.Wm82.a2.v1	493	729	780	480.143	177	458	181	1.2628	1.24725e-05	0.000192971	up	yes	chrChr05:40325845-40327778:-	gi|356513195|ref|XP_003525299.1|	1748	0	PREDICTED: zinc finger CCCH domain-containing protein 20-like [Glycine max]
Glyma.05G225900.Wm82.a2.v1	28	33	9	14.8337	3	13	0	1.11905	0.00812068	0.0439465	up	yes	chrChr05:40451889-40453150:+	gi|351724793|ref|NP_001235790.1|	631	6e-78	uncharacterized protein LOC100526906 [Glycine max]
Glyma.05G228400.Wm82.a2.v1	314	369	338	224.25	89	118	78	1.89579	4.40307e-22	5.6749e-20	up	yes	chrChr05:40638693-40643358:-	gi|356513163|ref|XP_003525283.1|	2448	0	PREDICTED: sugar transport protein 14-like [Glycine max]
Glyma.05G237000.Wm82.a2.v1	3003	2799	2451	1994.08	1245	893	1328	1.36609	4.3791e-16	3.52413e-14	up	yes	chrChr05:41337418-41344545:-	gi|571456616|ref|XP_006580435.1|	3035	0	PREDICTED: phosphoglucomutase, cytoplasmic-like [Glycine max]
Glyma.05G246500.Wm82.a2.v1	121	118	121	263.375	468	347	466	-1.57759	3.85203e-18	3.72352e-16	down	yes	chrChr05:42009068-42013268:+	gi|356512966|ref|XP_003525185.1|	2571	0	PREDICTED: phosphoethanolamine N-methyltransferase-like [Glycine max]
Glyma.05G247800.Wm82.a2.v1	2899	2680	2662	1721.9	641	386	710	2.28214	2.18203e-31	4.14696e-29	up	yes	chrChr05:42105777-42107998:-	gi|359807281|ref|NP_001241371.1|	1600	0	uncharacterized protein LOC100817359 precursor [Glycine max]
Glyma.05G247900.Wm82.a2.v1	2817	2890	2659	1732.91	565	570	531	2.45007	6.68599e-96	5.48561e-93	up	yes	chrChr05:42109945-42112794:-	gi|734344817|gb|KHN10524.1|	1773	0	Purple acid phosphatase 17 [Glycine soja]
Glyma.05G248000.Wm82.a2.v1	62	75	83	47.3026	21	20	14	1.86147	2.18756e-10	8.70854e-09	up	yes	chrChr05:42113952-42117137:-	gi|734344816|gb|KHN10523.1|	1076	2e-145	Annexin D5 [Glycine soja]
Glyma.06G000600.Wm82.a2.v1	26	22	26	45.6659	79	66	64	-1.15742	3.59784e-05	0.000493789	down	yes	chrChr06:93172-96057:+	gi|734372941|gb|KHN19966.1|	2045	0	Cyclin-B2-3 [Glycine soja]
Glyma.06G013300.Wm82.a2.v1	24	38	39	22.7674	12	15	5	1.34943	0.000257887	0.00263279	up	yes	chrChr06:997830-998748:-	gi|358248022|ref|NP_001240049.1|	384	7e-44	uncharacterized protein LOC100787789 precursor [Glycine max]
Glyma.06G014800.Wm82.a2.v1	7	5	3	12.3293	22	21	19	-1.22438	0.00214706	0.0150846	down	yes	chrChr06:1108797-1110462:-	gi|356517188|ref|XP_003527271.1|	1879	0	PREDICTED: xylem cysteine proteinase 2-like [Glycine max]
Glyma.06G018100.Wm82.a2.v1	34	33	44	62.5193	96	102	77	-1.01658	9.18177e-05	0.00110309	down	yes	chrChr06:1369425-1370433:-	gi|571458470|ref|XP_003527352.2|	1001	3e-133	PREDICTED: uncharacterized protein LOC100810616 [Glycine max]
Glyma.06G020300.Wm82.a2.v1	448	349	464	287.204	148	139	130	1.68562	4.46664e-21	5.46375e-19	up	yes	chrChr06:1539604-1541188:+	gi|351725883|ref|NP_001236340.1|	2086	0	ornithine decarboxylase [Glycine max]
Glyma.06G020800.Wm82.a2.v1	268	202	130	124.703	64	48	10	1.38785	0.000905603	0.0074978	up	yes	chrChr06:1577423-1579216:-	gi|356517640|ref|XP_003527495.1|	1107	4e-145	PREDICTED: uncharacterized protein At1g76070-like [Glycine max]
Glyma.06G024000.Wm82.a2.v1	256	287	182	187.134	135	141	105	1.02168	2.45477e-06	4.48783e-05	up	yes	chrChr06:1800214-1805307:-	gi|356517972|ref|XP_003527658.1|	3041	0	PREDICTED: uncharacterized protein LOC100795719 [Glycine max]
Glyma.06G025200.Wm82.a2.v1	227	166	179	133.765	60	86	65	1.48497	4.69241e-11	2.08518e-09	up	yes	chrChr06:1888158-1891061:-	gi|356518038|ref|XP_003527691.1|	1110	5e-149	PREDICTED: cytokinin riboside 5'-monophosphate phosphoribohydrolase LOG3 isoform X1 [Glycine max]
Glyma.06G028200.Wm82.a2.v1	2339	2430	2188	1249.21	52	56	50	5.40905	2.81875e-243	1.8964e-239	up	yes	chrChr06:2196938-2202255:+	gi|358248816|ref|NP_001239689.1|	2389	0	uncharacterized protein LOC100794124 [Glycine max]
Glyma.06G029600.Wm82.a2.v1	133	137	123	218.405	263	320	371	-1.04937	3.74503e-08	9.95096e-07	down	yes	chrChr06:2313588-2314965:-	gi|571458677|ref|XP_003527681.2|	593	4e-72	PREDICTED: ocs element-binding factor 1-like [Glycine max]
Glyma.06G033100.Wm82.a2.v1	42	29	22	56.5301	90	79	88	-1.1322	4.82319e-05	0.000636264	down	yes	chrChr06:2550783-2555478:+	gi|356518044|ref|XP_003527694.1|	3135	0	PREDICTED: DNA ligase 1-like [Glycine max]
Glyma.06G037000.Wm82.a2.v1	557	463	389	343.517	216	285	109	1.22757	3.36263e-06	5.91918e-05	up	yes	chrChr06:2839896-2841514:-	gi|356519158|ref|XP_003528241.1|	1314	4e-177	PREDICTED: uncharacterized protein LOC100526861 [Glycine max]
Glyma.06G045400.Wm82.a2.v1	1607	1346	686	747.016	246	307	126	1.90254	3.15969e-07	7.00651e-06	up	yes	chrChr06:3452456-3454706:-	gi|356514469|ref|XP_003525928.1|	1174	1e-153	PREDICTED: zinc finger protein ZAT10 [Glycine max]
Glyma.06G046600.Wm82.a2.v1	153	150	119	108.862	60	77	84	1.01908	5.83492e-06	9.72169e-05	up	yes	chrChr06:3524186-3528220:+	gi|356518132|ref|XP_003527736.1|	3664	0	PREDICTED: tetratricopeptide repeat protein 7B-like isoform X1 [Glycine max]
Glyma.06G049400.Wm82.a2.v1	553	719	481	430.899	220	271	292	1.26045	4.29696e-11	1.91959e-09	up	yes	chrChr06:3717317-3721092:-	gi|356514533|ref|XP_003525960.1|	3152	0	PREDICTED: probable xyloglucan glycosyltransferase 12-like [Glycine max]
Glyma.06G050300.Wm82.a2.v1	279	320	306	200.935	61	118	87	1.78608	1.99143e-15	1.49531e-13	up	yes	chrChr06:3823010-3824607:+	gi|356514561|ref|XP_003525974.1|	1169	1e-155	PREDICTED: zinc finger CCCH domain-containing protein 23-like [Glycine max]
Glyma.06G051800.Wm82.a2.v1	12	10	12	7.23166	5	3	0	1.09996	0.00926605	0.0487642	up	yes	chrChr06:3903770-3904881:-	gi|356518155|ref|XP_003527747.1|	995	8e-133	PREDICTED: abscisic acid receptor PYL2-like [Glycine max]
Glyma.06G051900.Wm82.a2.v1	375	375	615	284.532	93	132	58	2.16875	2.75841e-16	2.26871e-14	up	yes	chrChr06:3908172-3909900:+	gi|734402740|gb|KHN32212.1|	985	4e-130	Transcription factor MYB1R1 [Glycine soja]
Glyma.06G052300.Wm82.a2.v1	12	12	6	19.0042	37	20	31	-1.00349	0.00735694	0.0405506	down	yes	chrChr06:3935229-3939297:+	gi|356518159|ref|XP_003527749.1|	1329	2e-178	PREDICTED: uncharacterized protein LOC100806703 isoform X1 [Glycine max]
Glyma.06G056600.Wm82.a2.v1	107	96	30	41.9734	0	4	2	3.25988	1.89956e-16	1.59748e-14	up	yes	chrChr06:4286782-4289136:-	gi|734402693|gb|KHN32165.1|	753	2e-96	hypothetical protein glysoja_035258 [Glycine soja]
Glyma.06G058200.Wm82.a2.v1	1	2	1	5.37593	14	5	11	-1.11816	0.00788928	0.0428459	down	yes	chrChr06:4377232-4381986:-	gi|356518189|ref|XP_003527764.1|	2157	0	PREDICTED: 3beta-hydroxysteroid-dehydrogenase/decarboxylase isoform 2-like [Glycine max]
Glyma.06G061200.Wm82.a2.v1	52	39	49	94.8274	161	172	116	-1.36943	2.12024e-08	5.85168e-07	down	yes	chrChr06:4615389-4616541:-	gi|734331417|gb|KHN07016.1|	886	1e-117	Early nodulin-like protein 1 [Glycine soja]
Glyma.06G063000.Wm82.a2.v1	50	41	33	74.3021	129	108	99	-1.14096	5.45872e-06	9.14928e-05	down	yes	chrChr06:4771525-4773530:-	gi|356515022|ref|XP_003526200.1|	2338	0	PREDICTED: U-box domain-containing protein 7-like [Glycine max]
Glyma.06G065300.Wm82.a2.v1	644	669	547	472.765	257	363	309	1.11921	1.3923e-10	5.71164e-09	up	yes	chrChr06:4996110-4996779:+	gi|571459206|ref|XP_006581339.1|	142	1e-08	PREDICTED: homeobox protein knotted-1-like 3-like isoform X3 [Glycine max]
Glyma.06G069000.Wm82.a2.v1	761	833	748	416.396	9	8	10	5.89252	3.60451e-127	5.27184e-124	up	yes	chrChr06:5290220-5291905:+	gi|734331484|gb|KHN07083.1|	1303	1e-178	SPX domain-containing protein 1 [Glycine soja]
Glyma.06G075200.Wm82.a2.v1	34	27	17	49.3557	77	66	85	-1.18152	5.49179e-05	0.000710259	down	yes	chrChr06:5816893-5821265:+	gi|351723073|ref|NP_001236754.1|	990	4e-132	uncharacterized protein LOC100527232 precursor [Glycine max]
Glyma.06G077200.Wm82.a2.v1	3609	3041	2735	2213.1	1148	1831	602	1.37998	3.17254e-07	7.03037e-06	up	yes	chrChr06:5962956-5964561:-	gi|356515541|ref|XP_003526458.1|	1027	1e-135	PREDICTED: uncharacterized protein LOC100776044 [Glycine max]
Glyma.06G077300.Wm82.a2.v1	5	11	5	15.0796	33	25	15	-1.08082	0.00643709	0.0365714	down	yes	chrChr06:5974721-5979299:-	gi|356518290|ref|XP_003527812.1|	3656	0	PREDICTED: putative cyclic nucleotide-gated ion channel 18-like [Glycine max]
Glyma.06G077700.Wm82.a2.v1	127	92	89	62.2155	17	13	21	2.38054	1.85779e-16	1.56627e-14	up	yes	chrChr06:6010956-6014824:-	gi|356515543|ref|XP_003526459.1|	3468	0	PREDICTED: probable xyloglucan glycosyltransferase 5-like [Glycine max]
Glyma.06G078700.Wm82.a2.v1	34	26	33	20.1502	2	14	8	1.45367	0.000188624	0.00202074	up	yes	chrChr06:6080839-6082716:-	gi|571459448|ref|XP_003526464.2|	937	6e-120	PREDICTED: oleosin 1-like [Glycine max]
Glyma.06G079400.Wm82.a2.v1	192	102	177	83.4575	2	1	0	4.75509	1.73823e-39	4.29944e-37	up	yes	chrChr06:6105463-6107101:+	.	.	.	.
Glyma.06G079500.Wm82.a2.v1	778	690	958	438.862	16	41	18	4.64769	3.63672e-76	2.22429e-73	up	yes	chrChr06:6107326-6110770:+	gi|356515556|ref|XP_003526465.1|	1242	3e-166	PREDICTED: uncharacterized protein LOC100780305 [Glycine max]
Glyma.06G085800.Wm82.a2.v1	972	1199	979	581.318	49	60	64	4.14113	4.45305e-115	5.54801e-112	up	yes	chrChr06:6612660-6616547:+	gi|734366735|gb|KHN18168.1|	3022	0	Carotenoid cleavage dioxygenase 8, chloroplastic [Glycine soja]
Glyma.06G088400.Wm82.a2.v1	29	41	32	23.4269	5	10	20	1.24577	0.000872248	0.00725917	up	yes	chrChr06:6851664-6857631:+	gi|356518372|ref|XP_003527853.1|	5088	0	PREDICTED: receptor-like protein kinase HSL1-like [Glycine max]
Glyma.06G088800.Wm82.a2.v1	33	37	41	84.4952	160	137	119	-1.578	5.51932e-11	2.43335e-09	down	yes	chrChr06:6878707-6881320:-	gi|734366705|gb|KHN18138.1|	1519	0	Serine/threonine-protein kinase Aurora-1 [Glycine soja]
Glyma.06G093600.Wm82.a2.v1	456	647	493	884.239	1403	1318	1142	-1.05989	1.52837e-10	6.2243e-09	down	yes	chrChr06:7384586-7386334:+	gi|571459706|ref|XP_003526531.2|	2193	0	PREDICTED: protein ASPARTIC PROTEASE IN GUARD CELL 2-like [Glycine max]
Glyma.06G096000.Wm82.a2.v1	301	324	232	200.093	89	97	129	1.50698	8.62304e-13	4.90813e-11	up	yes	chrChr06:7582183-7589228:-	gi|571459745|ref|XP_006581504.1|	3174	0	PREDICTED: mechanosensitive ion channel protein 2, chloroplastic-like [Glycine max]
Glyma.06G100500.Wm82.a2.v1	8	6	17	24.2183	40	45	35	-1.34138	0.000208664	0.00219853	down	yes	chrChr06:7975853-7976855:-	gi|734339545|gb|KHN08960.1|	963	4e-128	hypothetical protein glysoja_021782 [Glycine soja]
Glyma.06G103300.Wm82.a2.v1	68	46	80	41.9769	17	13	20	1.76327	2.45689e-08	6.7193e-07	up	yes	chrChr06:8221103-8222833:-	gi|356518473|ref|XP_003527903.1|	1607	0	PREDICTED: transcription factor MYB39-like [Glycine max]
Glyma.06G105600.Wm82.a2.v1	412	322	426	225.796	61	43	34	2.99515	6.62987e-41	1.72885e-38	up	yes	chrChr06:8446202-8450551:-	gi|356515810|ref|XP_003526591.1|	1767	0	PREDICTED: phosphoglycerate mutase-like isoform X1 [Glycine max]
Glyma.06G108700.Wm82.a2.v1	65	72	111	59.8959	36	36	32	1.24526	8.75822e-06	0.000140495	up	yes	chrChr06:8745829-8747898:+	gi|571459960|ref|XP_006581569.1|	1799	0	PREDICTED: glucan endo-1,3-beta-glucosidase-like [Glycine max]
Glyma.06G110700.Wm82.a2.v1	613	642	787	527.962	465	384	231	1.0112	4.98365e-06	8.42861e-05	up	yes	chrChr06:8945501-8948684:-	gi|734340074|gb|KHN09184.1|	4155	0	G-type lectin S-receptor-like serine/threonine-protein kinase [Glycine soja]
Glyma.06G111600.Wm82.a2.v1	149	213	51	79.089	6	29	6	1.50648	0.000356704	0.00343226	up	yes	chrChr06:9031777-9036801:+	gi|356518529|ref|XP_003527931.1|	1960	0	PREDICTED: WAT1-related protein At4g08290-like [Glycine max]
Glyma.06G111800.Wm82.a2.v1	105	126	82	67.5271	43	16	21	1.80051	5.09769e-09	1.58412e-07	up	yes	chrChr06:9052451-9057739:+	gi|356515878|ref|XP_003526624.1|	1528	0	PREDICTED: WAT1-related protein At4g08290-like [Glycine max]
Glyma.06G114200.Wm82.a2.v1	742	1601	1187	859.206	396	566	563	1.25922	1.17123e-07	2.81311e-06	up	yes	chrChr06:9259001-9262206:-	gi|356515904|ref|XP_003526637.1|	2108	0	PREDICTED: aspartic proteinase Asp1-like [Glycine max]
Glyma.06G116100.Wm82.a2.v1	28	26	32	65.8695	125	90	110	-1.55747	2.24173e-09	7.5109e-08	down	yes	chrChr06:9446036-9449371:+	gi|356515929|ref|XP_003526649.1|	2272	0	PREDICTED: cyclin-A1-1-like [Glycine max]
Glyma.06G116900.Wm82.a2.v1	434	353	229	227.455	118	69	124	1.68904	4.23705e-11	1.89787e-09	up	yes	chrChr06:9502692-9518655:+	gi|571460069|ref|XP_006581596.1|	5478	0	PREDICTED: protein translocase subunit SECA2, chloroplastic-like isoform X2 [Glycine max]
Glyma.06G119700.Wm82.a2.v1	926	1336	928	819.865	650	559	448	1.05717	2.6686e-08	7.23943e-07	up	yes	chrChr06:9737042-9744505:-	gi|356515953|ref|XP_003526661.1|	2138	0	PREDICTED: TOM1-like protein 2-like [Glycine max]
Glyma.06G120400.Wm82.a2.v1	1832	2021	2529	1123.94	0	3	2	8.05093	7.0315e-165	1.81948e-161	up	yes	chrChr06:9786617-9792682:+	gi|571463157|ref|XP_006582504.1|	3193	0	PREDICTED: proline-rich receptor-like protein kinase PERK12-like [Glycine max]
Glyma.06G126300.Wm82.a2.v1	28	19	29	18.0697	11	8	11	1.12123	0.00235914	0.016264	up	yes	chrChr06:10331312-10341252:-	gi|571460203|ref|XP_003527976.2|	1972	0	PREDICTED: probable trehalose-phosphate phosphatase 2-like [Glycine max]
Glyma.06G135900.Wm82.a2.v1	131	163	59	85.3145	40	91	17	1.04771	0.00478696	0.0288426	up	yes	chrChr06:11153274-11154147:+	gi|356516150|ref|XP_003526759.1|	406	1e-46	PREDICTED: uncharacterized protein LOC100802275 [Glycine max]
Glyma.06G136300.Wm82.a2.v1	102	98	111	77.9254	85	32	32	1.04031	0.000780282	0.00660491	up	yes	chrChr06:11162423-11162877:+	.	.	.	.
Glyma.06G137000.Wm82.a2.v1	15	6	11	47.2348	88	105	73	-2.35787	1.77733e-13	1.09904e-11	down	yes	chrChr06:11215929-11224998:+	gi|356516162|ref|XP_003526765.1|	1814	0	PREDICTED: flavanone 3-dioxygenase-like [Glycine max]
Glyma.06G138600.Wm82.a2.v1	140	124	132	217.478	299	339	307	-1.03736	1.23062e-09	4.28981e-08	down	yes	chrChr06:11318029-11319071:-	gi|356516182|ref|XP_003526775.1|	1002	3e-135	PREDICTED: 60S ribosomal protein L9-like isoform 1 [Glycine max]
Glyma.06G139500.Wm82.a2.v1	2203	1965	1308	985.743	42	37	59	5.04081	1.06981e-109	1.16088e-106	up	yes	chrChr06:11374542-11383558:-	gi|734316200|gb|KHN02137.1|	6383	0	ABC transporter B family member 19 [Glycine soja]
Glyma.06G140000.Wm82.a2.v1	241	172	147	139.46	82	99	80	1.1686	4.66903e-07	9.90299e-06	up	yes	chrChr06:11426310-11433480:+	gi|356516202|ref|XP_003526785.1|	2852	0	PREDICTED: cytochrome P450 714A1-like [Glycine max]
Glyma.06G141200.Wm82.a2.v1	25	21	22	14.4683	6	2	8	1.49726	0.000153941	0.00170961	up	yes	chrChr06:11503086-11506571:-	gi|356516217|ref|XP_003526792.1|	1404	0	PREDICTED: methylesterase 17 [Glycine max]
Glyma.06G144000.Wm82.a2.v1	613	733	229	351.751	212	180	86	1.25654	0.00160931	0.0119347	up	yes	chrChr06:11726252-11727355:+	gi|734388616|gb|KHN25819.1|	367	1e-39	hypothetical protein glysoja_038315 [Glycine soja]
Glyma.06G144100.Wm82.a2.v1	2064	2090	1943	1293.51	442	384	584	2.1928	5.11383e-40	1.30321e-37	up	yes	chrChr06:11736263-11743912:+	gi|571460531|ref|XP_006581728.1|	2311	0	PREDICTED: alpha-galactosidase-like [Glycine max]
Glyma.06G157400.Wm82.a2.v1	1355	820	880	695.898	555	327	130	1.173	0.00328515	0.0212968	up	yes	chrChr06:12937296-12939138:+	gi|513044651|gb|AGO14648.1|	1608	0	NAC transcription factor [Glycine max]
Glyma.06G158000.Wm82.a2.v1	22	6	10	7.94954	4	1	3	1.1722	0.00555496	0.0325376	up	yes	chrChr06:12971870-12978619:+	gi|356518808|ref|XP_003528069.1|	3233	0	PREDICTED: fatty acid amide hydrolase-like [Glycine max]
Glyma.06G164800.Wm82.a2.v1	73	88	62	178.323	298	291	301	-1.72542	2.43278e-19	2.60625e-17	down	yes	chrChr06:13640925-13644165:-	gi|356518852|ref|XP_003528091.1|	1309	1e-177	PREDICTED: mediator of RNA polymerase II transcription subunit 36a-like isoform X1 [Glycine max]
Glyma.06G169800.Wm82.a2.v1	2351	2828	2367	1934.33	1222	1131	1528	1.09128	1.69417e-12	9.34267e-11	up	yes	chrChr06:14183559-14185892:-	gi|571460988|ref|XP_006581864.1|	1949	0	PREDICTED: uncharacterized protein LOC100819515 isoform X1 [Glycine max]
Glyma.06G171100.Wm82.a2.v1	193	375	140	158.741	101	47	72	1.56424	3.9039e-07	8.46156e-06	up	yes	chrChr06:14330330-14331885:+	gi|571461021|ref|XP_006581875.1|	607	4e-73	PREDICTED: calcium-binding protein CML38-like [Glycine max]
Glyma.06G177600.Wm82.a2.v1	71	62	49	33.4597	1	5	3	3.17475	4.29966e-18	4.12069e-16	up	yes	chrChr06:15028015-15028633:-	gi|351723037|ref|NP_001235985.1|	434	1e-51	uncharacterized protein LOC100527175 [Glycine max]
Glyma.06G178000.Wm82.a2.v1	514	825	642	410.839	127	186	86	2.24732	6.93852e-20	7.70313e-18	up	yes	chrChr06:15064479-15066468:-	gi|356516637|ref|XP_003527000.1|	787	5e-98	PREDICTED: uncharacterized protein LOC100797123 [Glycine max]
Glyma.06G179500.Wm82.a2.v1	25	35	28	56.4021	96	84	82	-1.24662	2.46501e-06	4.50166e-05	down	yes	chrChr06:15244947-15247287:-	.	.	.	.
Glyma.06G184200.Wm82.a2.v1	825	970	841	677.597	457	538	372	1.07206	1.62832e-10	6.61535e-09	up	yes	chrChr06:15936592-15943930:+	gi|356516692|ref|XP_003527027.1|	4657	0	PREDICTED: probable alpha,alpha-trehalose-phosphate synthase [UDP-forming] 9-like isoform X1 [Glycine max]
Glyma.06G194500.Wm82.a2.v1	88	26	45	32.8835	12	6	13	1.80588	1.83892e-06	3.46357e-05	up	yes	chrChr06:17327580-17331840:+	gi|571461363|ref|XP_006581972.1|	1879	0	PREDICTED: GDSL esterase/lipase At1g74460-like [Glycine max]
Glyma.06G194700.Wm82.a2.v1	685	906	884	465.679	44	90	59	3.55185	1.14786e-56	4.95036e-54	up	yes	chrChr06:17347772-17348895:-	gi|734384916|gb|KHN24401.1|	152	1e-08	F-box/kelch-repeat protein [Glycine soja]
Glyma.06G195100.Wm82.a2.v1	710	726	351	436.96	279	320	184	1.21993	2.28862e-06	4.21614e-05	up	yes	chrChr06:17444167-17446196:-	gi|359807628|ref|NP_001240909.1|	1433	0	uncharacterized protein LOC100800129 [Glycine max]
Glyma.06G201200.Wm82.a2.v1	136	133	127	101.497	55	94	54	1.02565	3.50628e-05	0.000483392	up	yes	chrChr06:18489292-18491954:-	gi|571463268|ref|XP_006582555.1|	2458	0	PREDICTED: probable cyclin-dependent serine/threonine-protein kinase DDB_G0292550-like [Glycine max]
Glyma.06G205800.Wm82.a2.v1	36	35	45	26.4971	20	13	6	1.33526	0.000181034	0.00195304	up	yes	chrChr06:19583729-19590906:+	gi|571458126|ref|XP_006581051.1|	1218	6e-164	PREDICTED: uncharacterized protein LOC100816836 isoform X1 [Glycine max]
Glyma.06G206800.Wm82.a2.v1	23	25	10	34.415	53	40	62	-1.0001	0.00285891	0.0190325	down	yes	chrChr06:19930653-19936279:+	gi|356516884|ref|XP_003527122.1|	4962	0	PREDICTED: WD repeat and HMG-box DNA-binding protein 1-like [Glycine max]
Glyma.06G226700.Wm82.a2.v1	54	40	79	41.2384	27	24	18	1.23977	9.95997e-05	0.00118474	up	yes	chrChr06:32960675-32975258:+	gi|571461833|ref|XP_006582117.1|	5030	0	PREDICTED: probable LRR receptor-like serine/threonine-protein kinase At1g53430-like [Glycine max]
Glyma.06G229900.Wm82.a2.v1	2399	2042	2198	1344.69	444	313	369	2.63743	1.74041e-64	9.29293e-62	up	yes	chrChr06:35345701-35354129:+	gi|356517058|ref|XP_003527207.1|	5028	0	PREDICTED: phosphoenolpyruvate carboxylase, housekeeping isozyme-like isoform X1 [Glycine max]
Glyma.06G232100.Wm82.a2.v1	405	466	383	288.08	118	130	183	1.61304	2.1991e-16	1.83562e-14	up	yes	chrChr06:36442428-36452699:-	gi|356514603|ref|XP_003525995.1|	3196	0	PREDICTED: uncharacterized protein ycf45-like [Glycine max]
Glyma.06G235500.Wm82.a2.v1	45	28	88	105.894	130	243	122	-1.182	0.000314152	0.00309905	down	yes	chrChr06:38106249-38119835:-	gi|571458168|ref|XP_006581072.1|	2185	0	PREDICTED: tyrosine aminotransferase isoform X1 [Glycine max]
Glyma.06G236400.Wm82.a2.v1	738	690	404	465.733	300	325	291	1.09174	2.9474e-07	6.60985e-06	up	yes	chrChr06:38472142-38473297:+	gi|356517102|ref|XP_003527229.1|	580	5e-70	PREDICTED: ethylene-responsive transcription factor 4-like [Glycine max]
Glyma.06G244900.Wm82.a2.v1	26	22	22	69.2559	101	116	147	-1.94892	4.92173e-13	2.89444e-11	down	yes	chrChr06:41374550-41375551:+	gi|351721771|ref|NP_001235685.1|	372	1e-40	uncharacterized protein LOC100305715 [Glycine max]
Glyma.06G248700.Wm82.a2.v1	12	8	19	7.96615	1	3	3	1.33784	0.00150986	0.0113548	up	yes	chrChr06:41969612-41972774:+	gi|351727789|ref|NP_001236149.1|	1093	7e-148	uncharacterized protein LOC100526930 [Glycine max]
Glyma.06G248900.Wm82.a2.v1	2931	2535	1552	1341.15	283	238	154	3.23975	5.45139e-42	1.47887e-39	up	yes	chrChr06:42013055-42015422:+	gi|564010296|gb|AHB63576.1|	1735	0	NAC transcription factor [Glycine max]
Glyma.06G254900.Wm82.a2.v1	177	269	128	144.368	105	90	83	1.09325	1.90078e-05	0.000278728	up	yes	chrChr06:43416439-43424025:-	gi|571462147|ref|XP_006582194.1|	2465	0	PREDICTED: diacylglycerol kinase 5-like isoform X2 [Glycine max]
Glyma.06G259400.Wm82.a2.v1	138	150	48	84.2947	51	44	66	1.01286	0.00173816	0.0126888	up	yes	chrChr06:44428378-44439680:-	gi|571462217|ref|XP_006582216.1|	5464	0	PREDICTED: TMV resistance protein N-like [Glycine max]
Glyma.06G262300.Wm82.a2.v1	23	48	19	21.4368	15	11	10	1.07932	0.0041893	0.0258813	up	yes	chrChr06:44955111-44961845:-	gi|571463650|ref|XP_006582737.1|	4201	0	PREDICTED: uncharacterized protein LOC100812022 [Glycine max]
Glyma.06G262700.Wm82.a2.v1	730	689	407	370.718	102	109	104	2.50571	8.76322e-30	1.55151e-27	up	yes	chrChr06:44993233-44998019:-	gi|734393863|gb|KHN28385.1|	4099	0	Receptor-like serine/threonine-protein kinase SD1-8 [Glycine soja]
Glyma.06G275500.Wm82.a2.v1	423	317	203	175.608	30	17	14	3.53297	5.588e-34	1.14619e-31	up	yes	chrChr06:46642915-46644239:-	gi|356517316|ref|XP_003527334.1|	1171	2e-157	PREDICTED: uncharacterized protein LOC100800312 [Glycine max]
Glyma.06G276700.Wm82.a2.v1	19	19	42	14.2345	1	0	0	2.62238	3.71601e-10	1.43024e-08	up	yes	chrChr06:46778360-46778881:-	gi|734406320|gb|KHN33948.1|	263	7e-27	hypothetical protein glysoja_036755 [Glycine soja]
Glyma.06G277500.Wm82.a2.v1	3330	3222	2642	1971.64	791	780	689	2.13284	2.82309e-51	1.02114e-48	up	yes	chrChr06:46935641-46944254:+	gi|356517343|ref|XP_003527347.1|	5026	0	PREDICTED: phosphoenolpyruvate carboxylase-like [Glycine max]
Glyma.06G284900.Wm82.a2.v1	32	11	33	46.1078	61	91	57	-1.03262	0.0021297	0.0149908	down	yes	chrChr06:47339957-47343650:-	gi|571462462|ref|XP_006582292.1|	1339	3e-176	PREDICTED: probable transcription factor PosF21 [Glycine max]
Glyma.06G289500.Wm82.a2.v1	56	73	52	112.829	168	187	163	-1.24991	9.14511e-09	2.72e-07	down	yes	chrChr06:47822827-47826397:+	gi|734312985|gb|KHN01101.1|	559	1e-69	hypothetical protein glysoja_040290, partial [Glycine soja]
Glyma.06G289900.Wm82.a2.v1	73	90	78	132.407	201	195	180	-1.02345	1.81947e-07	4.21232e-06	down	yes	chrChr06:47861573-47865518:-	gi|356515152|ref|XP_003526265.1|	1623	0	PREDICTED: reticulon-like protein B17-like isoform X1 [Glycine max]
Glyma.06G290300.Wm82.a2.v1	40	29	28	63.3209	105	91	100	-1.28627	6.21393e-07	1.28713e-05	down	yes	chrChr06:47919790-47924970:+	gi|571462531|ref|XP_006582311.1|	3602	0	PREDICTED: protein TPX2-like isoform X1 [Glycine max]
Glyma.06G291100.Wm82.a2.v1	11	8	9	21.3415	35	35	35	-1.33599	0.000151467	0.00168882	down	yes	chrChr06:47982340-47983006:-	gi|356542967|ref|XP_003539935.1|	376	6e-43	PREDICTED: uncharacterized protein LOC100817338 isoform X1 [Glycine max]
Glyma.06G294600.Wm82.a2.v1	15	7	6	20.3932	39	32	28	-1.20826	0.00113855	0.00900534	down	yes	chrChr06:48365213-48367398:+	gi|356517524|ref|XP_003527437.1|	1307	1e-176	PREDICTED: expansin-A16-like [Glycine max]
Glyma.06G295000.Wm82.a2.v1	30	27	45	24.5189	16	17	9	1.12002	0.00153674	0.0115106	up	yes	chrChr06:48379841-48396172:-	gi|356517532|ref|XP_003527441.1|	1652	0	PREDICTED: bifunctional epoxide hydrolase 2-like [Glycine max]
Glyma.06G295400.Wm82.a2.v1	593	473	376	343.835	252	200	124	1.36563	1.25517e-08	3.64934e-07	up	yes	chrChr06:48443154-48444810:-	gi|351726148|ref|NP_001235581.1|	339	7e-35	uncharacterized protein LOC100305963 [Glycine max]
Glyma.06G295700.Wm82.a2.v1	1452	1193	1080	922.924	598	404	708	1.21836	1.48215e-09	5.11889e-08	up	yes	chrChr06:48460473-48468376:+	gi|371502138|ref|NP_001243073.1|	1903	0	3'-hydroxy-N-methyl-(S)-coclaurine 4'-O-methyltransferase-like [Glycine max]
Glyma.06G300200.Wm82.a2.v1	527	391	275	241.426	119	68	14	1.4028	0.00088965	0.00739302	up	yes	chrChr06:48908958-48910448:-	gi|356515230|ref|XP_003526304.1|	1557	0	PREDICTED: myb-related protein Myb4-like [Glycine max]
Glyma.06G300500.Wm82.a2.v1	29	29	49	20.5384	8	1	2	2.19859	3.30087e-08	8.84764e-07	up	yes	chrChr06:48942190-48944798:+	gi|356517592|ref|XP_003527471.1|	1165	1e-155	PREDICTED: uncharacterized protein LOC100781575 [Glycine max]
Glyma.06G306200.Wm82.a2.v1	3	2	4	13.1923	16	42	16	-1.63075	8.24513e-05	0.00100723	down	yes	chrChr06:49512838-49514834:-	gi|356515284|ref|XP_003526331.1|	2167	0	PREDICTED: putative UPF0481 protein At3g02645-like [Glycine max]
Glyma.06G308100.Wm82.a2.v1	33	37	41	68.6012	106	102	106	-1.20795	6.19098e-07	1.28317e-05	down	yes	chrChr06:49682427-49687859:-	gi|571462745|ref|XP_006582370.1|	3350	0	PREDICTED: condensin complex subunit 2-like isoform X1 [Glycine max]
Glyma.06G310600.Wm82.a2.v1	112	100	40	60.487	28	35	40	1.19516	0.000242536	0.00250036	up	yes	chrChr06:49910728-49913310:+	gi|571462782|ref|XP_006582382.1|	1069	1e-136	PREDICTED: RING-H2 finger protein ATL52-like [Glycine max]
Glyma.06G310700.Wm82.a2.v1	6917	5723	3539	4112.66	2772	3152	2158	1.08728	7.92165e-07	1.61013e-05	up	yes	chrChr06:49925281-49929008:+	gi|356515312|ref|XP_003526345.1|	1911	0	PREDICTED: WAT1-related protein At5g07050-like [Glycine max]
Glyma.06G319900.Wm82.a2.v1	27	33	26	51.8148	86	57	92	-1.109	0.000101486	0.00120547	down	yes	chrChr06:50865413-50868583:+	gi|351725025|ref|NP_001237078.1|	806	4e-105	uncharacterized protein LOC100500119 [Glycine max]
Glyma.06G323700.Wm82.a2.v1	253	377	341	193.251	60	31	53	2.6636	1.30918e-28	2.18018e-26	up	yes	chrChr06:51145662-51154901:+	gi|356515414|ref|XP_003526395.1|	5212	0	PREDICTED: probable sucrose-phosphate synthase 4-like isoform X1 [Glycine max]
Glyma.06G324300.Wm82.a2.v1	3239	2634	2854	4962.28	6240	4124	11563	-1.03361	7.25347e-05	0.000902689	down	yes	chrChr06:51189321-51193954:-	gi|571462982|ref|XP_006582441.1|	3757	0	PREDICTED: cellulose synthase-like protein G1-like [Glycine max]
Glyma.06G324900.Wm82.a2.v1	786	779	746	589.071	393	435	338	1.12209	2.32543e-14	1.58031e-12	up	yes	chrChr06:51277285-51281350:-	gi|571463000|ref|XP_006582447.1|	1577	0	PREDICTED: uncharacterized protein LOC100796425 isoform X1 [Glycine max]
Glyma.07G008500.Wm82.a2.v1	11	22	17	11.1323	6	5	4	1.19579	0.00324675	0.0210804	up	yes	chrChr07:627139-629097:+	gi|571464262|ref|XP_006583007.1|	1815	0	PREDICTED: myb-related protein 330-like [Glycine max]
Glyma.07G010000.Wm82.a2.v1	10	8	5	15.4297	35	21	17	-1.01986	0.00909692	0.0480545	down	yes	chrChr07:748777-750240:-	.	.	.	.
Glyma.07G011800.Wm82.a2.v1	3915	4430	3515	2130.6	90	75	113	5.33958	5.98061e-211	2.87402e-207	up	yes	chrChr07:904208-906917:-	gi|356522610|ref|XP_003529939.1|	1445	0	PREDICTED: inorganic pyrophosphatase 2-like [Glycine max]
Glyma.07G011900.Wm82.a2.v1	6515	7753	6784	3748.25	83	107	90	6.17199	0	0	up	yes	chrChr07:908897-911028:-	gi|359807590|ref|NP_001241414.1|	1443	0	uncharacterized protein LOC100785878 [Glycine max]
Glyma.07G012800.Wm82.a2.v1	402	480	497	763.7	974	1216	1141	-1.06411	6.129e-12	3.12384e-10	down	yes	chrChr07:1002165-1004266:+	gi|351722416|ref|NP_001238011.1|	772	5e-101	uncharacterized protein LOC100499921 [Glycine max]
Glyma.07G014500.Wm82.a2.v1	9801	5675	5318	4772.26	2591	1292	3218	1.33166	0.000171122	0.0018617	up	yes	chrChr07:1145046-1146554:+	gi|1351033|sp|P10742.2|S25K_SOYBN	1476	0	RecName: Full=Stem 31 kDa glycoprotein; AltName: Full=Vegetative storage protein VSP25; Flags: Precursor
Glyma.07G017200.Wm82.a2.v1	6	21	19	30.8983	53	56	37	-1.15105	0.00116736	0.00917707	down	yes	chrChr07:1389583-1390674:+	.	.	.	.
Glyma.07G019100.Wm82.a2.v1	2033	2184	3369	1956.13	1315	1287	1372	1.04703	2.24626e-08	6.16944e-07	up	yes	chrChr07:1511438-1519417:-	gi|571464459|ref|XP_006583071.1|	3022	0	PREDICTED: malonate--CoA ligase-like isoform X3 [Glycine max]
Glyma.07G020000.Wm82.a2.v1	1164	1283	1140	1914.13	2654	2620	2934	-1.00126	2.08749e-16	1.74679e-14	down	yes	chrChr07:1568510-1570645:+	gi|571463853|ref|XP_006582827.1|	1138	5e-153	PREDICTED: uncharacterized protein LOC100305682 isoform X1 [Glycine max]
Glyma.07G021800.Wm82.a2.v1	2351	2032	1800	1342.64	728	522	378	1.96341	4.13902e-21	5.08148e-19	up	yes	chrChr07:1697119-1698666:+	gi|356523203|ref|XP_003530231.1|	615	1e-75	PREDICTED: chaperone protein dnaJ 8, chloroplastic [Glycine max]
Glyma.07G023300.Wm82.a2.v1	1019	820	940	617.401	407	321	93	1.30329	0.000976774	0.00795724	up	yes	chrChr07:1772171-1774607:-	gi|356523273|ref|XP_003530265.1|	1296	2e-173	PREDICTED: probable WRKY transcription factor 40-like isoform 1 [Glycine max]
Glyma.07G023600.Wm82.a2.v1	201	184	225	153.489	101	101	93	1.15511	1.08663e-09	3.81557e-08	up	yes	chrChr07:1816438-1824740:+	gi|356523294|ref|XP_003530275.1|	2794	0	PREDICTED: metal transporter Nramp1-like isoform X1 [Glycine max]
Glyma.07G023700.Wm82.a2.v1	1014	807	906	707.898	632	501	326	1.00442	2e-06	3.73767e-05	up	yes	chrChr07:1825609-1828774:-	gi|356522272|ref|XP_003529771.1|	1674	0	PREDICTED: cinnamoyl-CoA reductase 1-like [Glycine max]
Glyma.07G025600.Wm82.a2.v1	3	5	5	10.4099	20	20	12	-1.12057	0.00615326	0.0353044	down	yes	chrChr07:1999918-2002329:+	gi|356522294|ref|XP_003529782.1|	933	4e-121	PREDICTED: UPF0326 protein At4g17486-like isoform X1 [Glycine max]
Glyma.07G031000.Wm82.a2.v1	346	217	241	192.65	148	101	78	1.3323	8.14496e-08	2.00284e-06	up	yes	chrChr07:2456916-2457991:+	gi|734313438|gb|KHN01335.1|	609	2e-76	hypothetical protein glysoja_009541 [Glycine soja]
Glyma.07G031900.Wm82.a2.v1	904	945	976	615.142	193	333	227	1.9583	1.38334e-23	1.89164e-21	up	yes	chrChr07:2519441-2520929:-	gi|356519369|ref|XP_003528345.1|	566	9e-68	PREDICTED: uncharacterized protein At1g15400-like [Glycine max]
Glyma.07G032500.Wm82.a2.v1	61	51	54	108.693	180	120	209	-1.30682	1.18918e-07	2.85124e-06	down	yes	chrChr07:2548406-2554206:-	gi|571464664|ref|XP_006583130.1|	2930	0	PREDICTED: WD repeat-containing protein 43-like isoform X2 [Glycine max]
Glyma.07G034100.Wm82.a2.v1	39	20	29	55.4607	104	76	76	-1.18	4.48658e-05	0.000597483	down	yes	chrChr07:2677660-2683555:+	gi|571464686|ref|XP_006583135.1|	2228	0	PREDICTED: cyclin-A2-4-like [Glycine max]
Glyma.07G034400.Wm82.a2.v1	371	465	373	311.706	195	224	214	1.05863	2.78529e-10	1.09584e-08	up	yes	chrChr07:2729540-2731558:+	gi|356519433|ref|XP_003528377.1|	1889	0	PREDICTED: F-box/kelch-repeat protein At1g80440-like [Glycine max]
Glyma.07G034900.Wm82.a2.v1	26	9	18	11.527	7	4	3	1.24324	0.00260166	0.017602	up	yes	chrChr07:2782231-2787974:-	gi|356519443|ref|XP_003528382.1|	4567	0	PREDICTED: linoleate 9S-lipoxygenase 1-like isoform 1 [Glycine max]
Glyma.07G045500.Wm82.a2.v1	164	187	213	136.337	67	93	77	1.32373	5.21903e-10	1.95504e-08	up	yes	chrChr07:3790645-3792095:-	gi|351724839|ref|NP_001237583.1|	1065	2e-143	uncharacterized protein LOC100527543 [Glycine max]
Glyma.07G049900.Wm82.a2.v1	7140	7692	6851	5116.43	3202	1402	3733	1.40316	1.93755e-08	5.39099e-07	up	yes	chrChr07:4243258-4248040:+	gi|351726654|ref|NP_001236366.1|	3054	0	granule-bound starch synthase [Glycine max]
Glyma.07G050700.Wm82.a2.v1	49	31	51	77.0424	101	127	117	-1.10074	1.63551e-05	0.000243869	down	yes	chrChr07:4376298-4379923:+	gi|356522484|ref|XP_003529876.1|	1265	2e-163	PREDICTED: RNA-binding protein 24-B-like [Glycine max]
Glyma.07G051400.Wm82.a2.v1	86	56	70	51.5838	28	39	24	1.19963	3.69077e-05	0.000504896	up	yes	chrChr07:4434210-4435794:+	gi|356520237|ref|XP_003528770.1|	1449	0	PREDICTED: uncharacterized protein LOC100795196 [Glycine max]
Glyma.07G052300.Wm82.a2.v1	319	434	352	248.237	91	133	120	1.74019	6.24128e-18	5.8482e-16	up	yes	chrChr07:4557779-4559942:+	gi|356520249|ref|XP_003528776.1|	2712	0	PREDICTED: cytochrome P450 78A3-like [Glycine max]
Glyma.07G054000.Wm82.a2.v1	822	612	648	530.602	386	400	263	1.09655	1.65563e-08	4.68803e-07	up	yes	chrChr07:4722086-4723755:+	gi|356520266|ref|XP_003528784.1|	1163	8e-155	PREDICTED: myb-related protein 330-like [Glycine max]
Glyma.07G057400.Wm82.a2.v1	256	417	114	179.834	93	122	50	1.40416	2.45921e-05	0.000352774	up	yes	chrChr07:5100360-5103308:+	gi|363807674|ref|NP_001242675.1|	1735	0	WRKY55 protein [Glycine max]
Glyma.07G059300.Wm82.a2.v1	5349	4989	5168	3053.45	794	669	610	2.99676	4.05692e-111	4.54902e-108	up	yes	chrChr07:5293201-5300088:-	gi|356520310|ref|XP_003528806.1|	1295	6e-176	PREDICTED: ribonuclease 2-like [Glycine max]
Glyma.07G060000.Wm82.a2.v1	812	840	816	1319.2	1826	1827	2008	-1.00576	2.1106e-17	1.91371e-15	down	yes	chrChr07:5342520-5345316:-	gi|356520322|ref|XP_003528812.1|	1414	0	PREDICTED: 60S ribosomal protein L5-like isoform X1 [Glycine max]
Glyma.07G061200.Wm82.a2.v1	36	25	10	12.5095	0	0	0	2.49343	3.51826e-09	1.13363e-07	up	yes	chrChr07:5431822-5432910:-	gi|359806664|ref|NP_001241537.1|	191	4e-15	uncharacterized protein LOC100781804 [Glycine max]
Glyma.07G069600.Wm82.a2.v1	520	495	441	325.092	185	103	153	1.78105	1.47511e-18	1.47682e-16	up	yes	chrChr07:6307073-6313498:-	gi|356520396|ref|XP_003528848.1|	3059	0	PREDICTED: probable anion transporter 2, chloroplastic-like [Glycine max]
Glyma.07G070300.Wm82.a2.v1	243	298	389	179.279	33	42	25	3.06316	1.4627e-35	3.15408e-33	up	yes	chrChr07:6364435-6372387:-	gi|571465222|ref|XP_006583291.1|	4623	0	PREDICTED: U-box domain-containing protein 33-like isoform X1 [Glycine max]
Glyma.07G071100.Wm82.a2.v1	980	954	972	690.243	416	375	353	1.47951	2.44816e-29	4.24504e-27	up	yes	chrChr07:6475171-6480339:-	gi|356522618|ref|XP_003529943.1|	2343	0	PREDICTED: uncharacterized protein LOC100784277 isoform X1 [Glycine max]
Glyma.07G073700.Wm82.a2.v1	407	383	353	208.882	13	14	22	4.2814	5.62896e-73	3.32198e-70	up	yes	chrChr07:6705850-6716880:+	gi|356522640|ref|XP_003529954.1|	5252	0	PREDICTED: K(+) efflux antiporter 2, chloroplastic-like isoform X1 [Glycine max]
Glyma.07G076600.Wm82.a2.v1	79	165	58	73.0576	58	51	19	1.09451	0.001851	0.0133682	up	yes	chrChr07:6945666-6946706:+	gi|356520457|ref|XP_003528878.1|	948	4e-126	PREDICTED: BON1-associated protein 2-like [Glycine max]
Glyma.07G082500.Wm82.a2.v1	12	5	15	6.10787	1	1	1	1.43247	0.000681095	0.00590956	up	yes	chrChr07:7568946-7570260:-	gi|356522702|ref|XP_003529985.1|	1283	5e-173	PREDICTED: probable carboxylesterase 8-like [Glycine max]
Glyma.07G087200.Wm82.a2.v1	227	247	117	141.058	92	105	40	1.25618	4.26252e-05	0.000571491	up	yes	chrChr07:8063714-8064534:+	gi|255633846|gb|ACU17284.1|	469	9e-57	unknown [Glycine max]
Glyma.07G094100.Wm82.a2.v1	28	36	26	21.631	9	17	11	1.10934	0.00190192	0.013627	up	yes	chrChr07:8787245-8791003:+	gi|571465609|ref|XP_006583412.1|	3343	0	PREDICTED: probable receptor-like protein kinase At1g67000-like [Glycine max]
Glyma.07G094200.Wm82.a2.v1	128	139	141	90.8699	43	43	36	1.76275	7.46548e-15	5.30933e-13	up	yes	chrChr07:8792240-8797837:+	gi|571465611|ref|XP_006583413.1|	3213	0	PREDICTED: probable receptor-like protein kinase At1g67000-like isoform X1 [Glycine max]
Glyma.07G094500.Wm82.a2.v1	52	73	36	40.1712	33	18	25	1.02916	0.00152007	0.0114188	up	yes	chrChr07:8810207-8815766:+	gi|571465627|ref|XP_006583421.1|	3245	0	PREDICTED: probable receptor-like protein kinase At1g67000-like isoform X2 [Glycine max]
Glyma.07G095000.Wm82.a2.v1	350	470	290	276.138	209	167	142	1.18388	3.36087e-08	8.98698e-07	up	yes	chrChr07:8843665-8855430:+	gi|571465619|ref|XP_006583417.1|	3323	0	PREDICTED: probable receptor-like protein kinase At1g67000-like isoform X3 [Glycine max]
Glyma.07G096500.Wm82.a2.v1	68	40	70	125.803	236	182	187	-1.45163	1.1707e-09	4.09793e-08	down	yes	chrChr07:9048744-9054130:+	gi|356520611|ref|XP_003528955.1|	4972	0	PREDICTED: kinesin-like protein NACK1-like isoform X1 [Glycine max]
Glyma.07G110600.Wm82.a2.v1	2898	3949	3997	2261	706	840	713	2.34041	1.97939e-47	5.94506e-45	up	yes	chrChr07:11345835-11349567:+	gi|356520800|ref|XP_003529048.1|	1428	0	PREDICTED: uncharacterized protein LOC100811704 [Glycine max]
Glyma.07G111400.Wm82.a2.v1	2	1	1	5.684	18	7	7	-1.1573	0.00598946	0.0346043	down	yes	chrChr07:11498613-11501522:+	gi|356523050|ref|XP_003530155.1|	2777	0	PREDICTED: UPF0481 protein At3g47200-like isoform X1 [Glycine max]
Glyma.07G113800.Wm82.a2.v1	106	65	60	53.1369	51	19	10	1.27713	0.000486876	0.0044554	up	yes	chrChr07:11840158-11840655:-	gi|571465982|ref|XP_003530145.2|	732	7e-96	PREDICTED: ethylene-responsive transcription factor 13-like [Glycine max]
Glyma.07G117300.Wm82.a2.v1	1584	1560	1987	2916.34	3923	3999	4956	-1.11602	6.48383e-13	3.72776e-11	down	yes	chrChr07:13123863-13125565:+	gi|351721079|ref|NP_001235150.1|	512	6e-61	uncharacterized protein LOC100499981 [Glycine max]
Glyma.07G123500.Wm82.a2.v1	630	640	640	384.082	82	117	107	2.68944	5.42346e-55	2.12139e-52	up	yes	chrChr07:14612400-14617190:+	gi|734392895|gb|KHN27826.1|	772	1e-100	hypothetical protein glysoja_040722 [Glycine soja]
Glyma.07G125600.Wm82.a2.v1	99	127	103	67.3131	9	40	11	2.03309	5.88528e-09	1.80634e-07	up	yes	chrChr07:15001863-15003239:-	gi|358248390|ref|NP_001240129.1|	733	1e-93	uncharacterized protein LOC100775516 [Glycine max]
Glyma.07G126400.Wm82.a2.v1	5896	6575	6321	4302.6	2135	1828	2409	1.68584	4.1891e-35	8.8627e-33	up	yes	chrChr07:15078431-15083262:-	gi|356520834|ref|XP_003529065.1|	2762	0	PREDICTED: 6-phosphofructokinase 3-like isoform X1 [Glycine max]
Glyma.07G126600.Wm82.a2.v1	289	377	320	220.377	75	65	160	1.66862	6.40433e-10	2.36482e-08	up	yes	chrChr07:15122531-15127433:-	gi|356520838|ref|XP_003529067.1|	1611	0	PREDICTED: inositol oxygenase 2-like isoform X1 [Glycine max]
Glyma.07G128000.Wm82.a2.v1	17	10	7	7.24058	3	2	3	1.15046	0.00639932	0.0363995	up	yes	chrChr07:15313241-15315484:-	gi|356523125|ref|XP_003530192.1|	2328	0	PREDICTED: 1-aminocyclopropane-1-carboxylate synthase 7-like [Glycine max]
Glyma.07G128300.Wm82.a2.v1	68	57	50	97.9875	136	104	190	-1.00612	0.000102978	0.00121889	down	yes	chrChr07:15338503-15341477:+	gi|356523127|ref|XP_003530193.1|	2632	0	PREDICTED: uncharacterized protein LOC100798223 [Glycine max]
Glyma.07G129100.Wm82.a2.v1	25	48	33	61.5415	71	119	84	-1.03063	0.000477499	0.00438988	down	yes	chrChr07:15384262-15386634:+	gi|356520869|ref|XP_003529082.1|	1231	1e-166	PREDICTED: tetraspanin-2 [Glycine max]
Glyma.07G132100.Wm82.a2.v1	27	14	22	37.6093	76	45	49	-1.02951	0.0015029	0.0113202	down	yes	chrChr07:15583703-15588326:-	gi|734419799|gb|KHN40305.1|	3161	0	Kinesin-like protein KIF22 [Glycine soja]
Glyma.07G133900.Wm82.a2.v1	23	22	27	16.7275	11	5	10	1.18422	0.00168478	0.0123726	up	yes	chrChr07:15868910-15873228:+	gi|356523165|ref|XP_003530212.1|	2866	0	PREDICTED: laccase-17-like [Glycine max]
Glyma.07G134000.Wm82.a2.v1	264	263	194	165.19	91	86	68	1.61379	1.89218e-14	1.299e-12	up	yes	chrChr07:15874533-15878794:-	gi|356520905|ref|XP_003529100.1|	1204	2e-163	PREDICTED: uncharacterized protein LOC100795918 [Glycine max]
Glyma.07G134600.Wm82.a2.v1	449	454	485	344.461	189	269	182	1.22208	3.77962e-11	1.72514e-09	up	yes	chrChr07:15965852-15967588:-	gi|356520915|ref|XP_003529105.1|	1212	2e-160	PREDICTED: E3 ubiquitin-protein ligase RING1-like [Glycine max]
Glyma.07G137100.Wm82.a2.v1	44	58	35	99.0985	156	135	189	-1.48279	1.78896e-09	6.06643e-08	down	yes	chrChr07:16275034-16277973:+	gi|356520933|ref|XP_003529114.1|	1153	9e-156	PREDICTED: uncharacterized protein At2g39795, mitochondrial-like [Glycine max]
Glyma.07G145900.Wm82.a2.v1	232	200	130	137.395	88	84	74	1.24564	1.66084e-07	3.88248e-06	up	yes	chrChr07:17465598-17470178:-	gi|356520991|ref|XP_003529142.1|	2867	0	PREDICTED: peptide transporter PTR1-like isoformX1 [Glycine max]
Glyma.07G146800.Wm82.a2.v1	197	77	109	83.147	36	26	38	1.76668	1.37214e-08	3.94846e-07	up	yes	chrChr07:17588034-17591814:-	gi|356520996|ref|XP_003529144.1|	2564	0	PREDICTED: glycerol-3-phosphate 2-O-acyltransferase 6-like [Glycine max]
Glyma.07G153800.Wm82.a2.v1	118	241	96	97.3452	30	40	41	1.85613	1.41822e-09	4.91829e-08	up	yes	chrChr07:18789552-18794329:-	gi|356521048|ref|XP_003529170.1|	2276	0	PREDICTED: ammonium transporter 2-like [Glycine max]
Glyma.07G158200.Wm82.a2.v1	60	59	60	44.9465	29	27	30	1.08181	7.94223e-05	0.000974712	up	yes	chrChr07:19658240-19667195:-	gi|356523372|ref|XP_003530314.1|	2522	0	PREDICTED: zinc finger protein JACKDAW-like [Glycine max]
Glyma.07G159700.Wm82.a2.v1	31	38	55	72.4007	132	111	81	-1.06431	0.000120673	0.00139783	down	yes	chrChr07:20424368-20428886:+	gi|358249052|ref|NP_001240240.1|	1979	0	uncharacterized protein LOC100799090 [Glycine max]
Glyma.07G163200.Wm82.a2.v1	266	396	218	210.148	117	150	87	1.34041	7.56154e-08	1.87445e-06	up	yes	chrChr07:21620464-21627482:+	gi|356523426|ref|XP_003530340.1|	4641	0	PREDICTED: extra-large guanine nucleotide-binding protein 1-like [Glycine max]
Glyma.07G163300.Wm82.a2.v1	47	39	50	23.9462	0	0	0	3.61045	2.44854e-19	2.61481e-17	up	yes	chrChr07:21628964-21629774:-	gi|255630498|gb|ACU15607.1|	280	2e-28	unknown [Glycine max]
Glyma.07G168900.Wm82.a2.v1	792	490	550	472.437	404	315	240	1.02598	3.78463e-06	6.55229e-05	up	yes	chrChr07:28235435-28242406:-	gi|571466637|ref|XP_003529216.2|	3770	0	PREDICTED: uncharacterized protein LOC100814036 [Glycine max]
Glyma.07G171600.Wm82.a2.v1	471	434	672	370.373	200	274	119	1.42051	2.68622e-08	7.28138e-07	up	yes	chrChr07:29707083-29710843:+	gi|356521159|ref|XP_003529225.1|	1375	0	PREDICTED: transcription factor bHLH121 isoform X1 [Glycine max]
Glyma.07G190100.Wm82.a2.v1	802	1449	912	805.661	464	721	409	1.05362	1.1934e-05	0.00018577	up	yes	chrChr07:35800280-35801744:-	gi|356521299|ref|XP_003529294.1|	815	2e-106	PREDICTED: F-box protein At1g61340-like [Glycine max]
Glyma.07G191500.Wm82.a2.v1	109	81	101	73.3948	69	52	21	1.01156	0.00121006	0.00944878	up	yes	chrChr07:35896463-35900509:+	gi|571463867|ref|XP_006582834.1|	2454	0	PREDICTED: uncharacterized protein LOC100306018 isoform X1 [Glycine max]
Glyma.07G197100.Wm82.a2.v1	1161	751	817	511.902	65	91	43	3.59346	1.2687e-50	4.35489e-48	up	yes	chrChr07:36546331-36549068:+	gi|356521370|ref|XP_003529329.1|	1437	0	PREDICTED: uncharacterized protein LOC100783925 [Glycine max]
Glyma.07G198600.Wm82.a2.v1	606	575	541	926.353	1224	1332	1430	-1.01283	4.34111e-14	2.87462e-12	down	yes	chrChr07:36704443-36707136:+	gi|356521380|ref|XP_003529334.1|	1066	2e-142	PREDICTED: 40S ribosomal protein S6 [Glycine max]
Glyma.07G199800.Wm82.a2.v1	145	253	157	128.877	58	73	69	1.48511	2.08822e-09	7.0316e-08	up	yes	chrChr07:36845530-36851584:+	gi|356519609|ref|XP_003528464.1|	3290	0	PREDICTED: MACPF domain-containing protein NSL1-like [Glycine max]
Glyma.07G200300.Wm82.a2.v1	0	3	8	16.0983	8	68	14	-1.24986	0.00305419	0.0200546	down	yes	chrChr07:36883943-36884908:-	gi|351726974|ref|NP_001235609.1|	666	3e-84	uncharacterized protein LOC100526893 [Glycine max]
Glyma.07G202500.Wm82.a2.v1	66	46	98	121.149	218	198	123	-1.03975	0.000185375	0.00199037	down	yes	chrChr07:37177013-37177959:-	gi|357485127|ref|XP_003612851.1|	706	2e-89	Histone H3 [Medicago truncatula]
Glyma.07G203200.Wm82.a2.v1	51	15	18	18.0962	7	1	13	1.23676	0.0030266	0.0198968	up	yes	chrChr07:37250076-37254583:+	gi|356519633|ref|XP_003528475.1|	1822	0	PREDICTED: GDSL esterase/lipase At5g45960-like [Glycine max]
Glyma.07G205000.Wm82.a2.v1	36	22	22	19.2616	8	12	13	1.07165	0.0037157	0.0235036	up	yes	chrChr07:37397437-37399559:+	gi|356519649|ref|XP_003528483.1|	1889	0	PREDICTED: phospholipase A1-IIgamma-like [Glycine max]
Glyma.07G209500.Wm82.a2.v1	78	69	53	125.034	208	188	179	-1.25862	3.52553e-09	1.13488e-07	down	yes	chrChr07:38016457-38019378:+	gi|356521477|ref|XP_003529382.1|	1728	0	PREDICTED: two-component response regulator-like APRR2-like isoform X1 [Glycine max]
Glyma.07G209900.Wm82.a2.v1	14	11	2	44.1175	145	58	50	-2.10169	4.98483e-08	1.28593e-06	down	yes	chrChr07:38059457-38062220:+	gi|356521479|ref|XP_003529383.1|	1679	0	PREDICTED: peroxidase 10-like [Glycine max]
Glyma.07G211300.Wm82.a2.v1	1	6	3	9.4005	21	15	13	-1.18231	0.00464302	0.0281265	down	yes	chrChr07:38265217-38267289:+	gi|356521494|ref|XP_003529390.1|	984	4e-129	PREDICTED: cyclin-dependent kinase inhibitor 7-like [Glycine max]
Glyma.07G212400.Wm82.a2.v1	562	495	457	300.724	106	82	31	2.59522	8.80284e-21	1.05007e-18	up	yes	chrChr07:38389881-38390911:-	gi|571468714|ref|XP_003529396.2|	1062	2e-139	PREDICTED: uncharacterized protein LOC100820426 [Glycine max]
Glyma.07G212700.Wm82.a2.v1	8	10	11	5.57021	1	0	2	1.36937	0.00115346	0.0090955	up	yes	chrChr07:38438138-38442086:-	gi|356519707|ref|XP_003528511.1|	2352	0	PREDICTED: abscisic acid 8'-hydroxylase 4-like [Glycine max]
Glyma.07G222700.Wm82.a2.v1	205	252	178	120.935	25	16	18	3.21872	2.17875e-36	4.91887e-34	up	yes	chrChr07:39866989-39873025:+	gi|359806882|ref|NP_001241574.1|	2248	0	probable inorganic phosphate transporter 1-9-like [Glycine max]
Glyma.07G229100.Wm82.a2.v1	145	102	65	70.5532	50	34	16	1.46577	1.05195e-05	0.000165589	up	yes	chrChr07:40913721-40915908:-	gi|734393409|gb|KHN28140.1|	1237	6e-167	NAC domain-containing protein 29 [Glycine soja]
Glyma.07G229200.Wm82.a2.v1	7	11	15	22.0104	48	22	34	-1.08924	0.0033353	0.0215762	down	yes	chrChr07:40921290-40923377:-	gi|356519848|ref|XP_003528581.1|	2492	0	PREDICTED: uncharacterized protein LOC100812233 [Glycine max]
Glyma.07G229500.Wm82.a2.v1	43	13	20	51.9009	78	113	55	-1.18892	0.000643441	0.00563371	down	yes	chrChr07:40937936-40938757:-	gi|571467514|ref|XP_006583962.1|	867	5e-116	PREDICTED: probable calcium-binding protein CML45-like [Glycine max]
Glyma.07G229600.Wm82.a2.v1	62	74	69	48.4319	22	28	29	1.35553	9.81105e-07	1.95866e-05	up	yes	chrChr07:40955576-40959168:-	gi|356519852|ref|XP_003528583.1|	2018	0	PREDICTED: cyclic dof factor 2-like isoform X1 [Glycine max]
Glyma.07G230600.Wm82.a2.v1	1517	1768	1672	1227.63	758	834	681	1.26058	4.36949e-20	4.9159e-18	up	yes	chrChr07:41134922-41140938:+	gi|734393419|gb|KHN28150.1|	1056	4e-140	hypothetical protein glysoja_023968 [Glycine soja]
Glyma.07G231400.Wm82.a2.v1	89	26	37	33.3729	17	13	12	1.47863	7.63603e-05	0.000941255	up	yes	chrChr07:41213292-41215492:+	gi|356521676|ref|XP_003529479.1|	3073	0	PREDICTED: ABC transporter G family member 23-like [Glycine max]
Glyma.07G232000.Wm82.a2.v1	362	376	345	266.412	168	169	148	1.28142	9.14174e-16	7.1185e-14	up	yes	chrChr07:41286415-41288564:-	gi|571463947|ref|XP_006582874.1|	1333	0	PREDICTED: uncharacterized protein LOC100527124 isoform X1 [Glycine max]
Glyma.07G233600.Wm82.a2.v1	39	37	37	68.7591	117	88	108	-1.17372	2.07697e-06	3.86862e-05	down	yes	chrChr07:41479149-41480391:+	gi|571468775|ref|XP_006584437.1|	1420	0	PREDICTED: uncharacterized protein LOC100778026 [Glycine max]
Glyma.07G238000.Wm82.a2.v1	258	261	218	189.72	142	138	104	1.05169	4.43749e-08	1.16528e-06	up	yes	chrChr07:41926439-41929460:-	gi|356519913|ref|XP_003528613.1|	1324	9e-176	PREDICTED: probable WRKY transcription factor 48-like [Glycine max]
Glyma.07G240900.Wm82.a2.v1	79	58	29	40.0578	16	35	18	1.10311	0.00192841	0.0138021	up	yes	chrChr07:42133390-42133953:+	gi|734318099|gb|KHN02902.1|	304	1e-32	hypothetical protein glysoja_009768 [Glycine soja]
Glyma.07G242900.Wm82.a2.v1	36	41	31	60.4014	93	81	91	-1.00991	6.97408e-05	0.000875377	down	yes	chrChr07:42269014-42273460:+	gi|734318120|gb|KHN02923.1|	2730	0	Importin subunit alpha-1 [Glycine soja]
Glyma.07G248600.Wm82.a2.v1	782	1520	859	748.051	314	564	350	1.37576	6.83797e-08	1.70513e-06	up	yes	chrChr07:42689011-42690217:-	gi|356521871|ref|XP_003529574.1|	924	6e-120	PREDICTED: toll-interacting protein-like [Glycine max]
Glyma.07G250500.Wm82.a2.v1	9	14	16	23.7191	42	32	34	-1.01914	0.00317105	0.0206847	down	yes	chrChr07:42850974-42852061:-	gi|571467784|ref|XP_006584039.1|	535	1e-64	PREDICTED: monothiol glutaredoxin-S2-like [Glycine max]
Glyma.07G250600.Wm82.a2.v1	3	7	8	14.6903	37	17	20	-1.21343	0.0024228	0.0166328	down	yes	chrChr07:42860001-42860511:+	gi|356521897|ref|XP_003529587.1|	540	3e-68	PREDICTED: monothiol glutaredoxin-S10-like [Glycine max]
Glyma.07G254000.Wm82.a2.v1	8	14	8	25.3446	21	53	54	-1.38741	0.000228749	0.0023779	down	yes	chrChr07:43099064-43101381:-	gi|356520017|ref|XP_003528663.1|	1804	0	PREDICTED: S-adenosylmethionine decarboxylase proenzyme-like [Glycine max]
Glyma.07G256100.Wm82.a2.v1	396	395	475	323.163	170	246	225	1.09315	3.91314e-09	1.25127e-07	up	yes	chrChr07:43222307-43226223:-	gi|356521937|ref|XP_003529606.1|	1175	2e-159	PREDICTED: endo-1,3;1,4-beta-D-glucanase-like isoform X1 [Glycine max]
Glyma.07G260600.Wm82.a2.v1	73	38	55	109.203	190	153	169	-1.31632	7.66522e-08	1.89457e-06	down	yes	chrChr07:43596343-43599749:+	gi|571467921|ref|XP_003529634.2|	3709	0	PREDICTED: uncharacterized protein LOC100818470 isoform X1 [Glycine max]
Glyma.07G261900.Wm82.a2.v1	73	83	54	129.219	155	159	276	-1.17642	7.5271e-06	0.000122498	down	yes	chrChr07:43676363-43680375:+	gi|356521999|ref|XP_003529637.1|	3401	0	PREDICTED: U3 small nucleolar RNA-associated protein 6 homolog [Glycine max]
Glyma.07G264100.Wm82.a2.v1	175	125	125	104.404	64	71	54	1.22803	1.67246e-07	3.90422e-06	up	yes	chrChr07:43837977-43839327:+	gi|356562763|ref|XP_003549638.1|	605	7e-73	PREDICTED: uncharacterized protein LOC100792613 [Glycine max]
Glyma.07G266200.Wm82.a2.v1	2314	2279	2129	1203	32	58	36	5.57953	1.75648e-189	5.90863e-186	up	yes	chrChr07:43986532-43990202:+	gi|734423661|gb|KHN42287.1|	1420	0	Inositol monophosphatase 3 [Glycine soja]
Glyma.07G267700.Wm82.a2.v1	78	81	73	139.528	194	241	196	-1.19566	3.02345e-09	9.87437e-08	down	yes	chrChr07:44087623-44094023:+	gi|571468015|ref|XP_006584101.1|	834	5e-106	PREDICTED: glutamic acid-rich protein-like isoform X2 [Glycine max]
Glyma.07G268800.Wm82.a2.v1	195	141	106	87.2022	30	13	17	2.58523	9.6739e-18	8.91562e-16	up	yes	chrChr07:44198407-44200455:+	gi|356522087|ref|XP_003529681.1|	1553	0	PREDICTED: U-box domain-containing protein 33-like [Glycine max]
Glyma.08G002100.Wm82.a2.v1	759	1018	688	595.971	394	386	259	1.33182	4.02855e-11	1.82391e-09	up	yes	chrChr08:141702-148847:-	gi|734363880|gb|KHN16941.1|	3076	0	Lipase [Glycine soja]
Glyma.08G003400.Wm82.a2.v1	10	9	7	19.5569	41	30	25	-1.26878	0.000548381	0.00493235	down	yes	chrChr08:261851-262912:+	gi|734363866|gb|KHN16927.1|	859	6e-114	Hypothetical protein glysoja_003024 [Glycine soja]
Glyma.08G006900.Wm82.a2.v1	376	409	423	306.84	189	177	237	1.12437	3.49752e-11	1.6029e-09	up	yes	chrChr08:530526-534468:-	gi|356527405|ref|XP_003532301.1|	2473	0	PREDICTED: calcium-binding mitochondrial carrier protein SCaMC-2-like [Glycine max]
Glyma.08G013100.Wm82.a2.v1	127	107	40	51.9919	14	9	1	2.51528	7.21658e-11	3.1083e-09	up	yes	chrChr08:1027312-1028389:-	gi|255640418|gb|ACU20496.1|	791	1e-102	unknown [Glycine max]
Glyma.08G015300.Wm82.a2.v1	87	81	112	176.479	339	255	221	-1.26898	6.50396e-09	1.98897e-07	down	yes	chrChr08:1204914-1206691:+	gi|356528453|ref|XP_003532817.1|	1513	0	PREDICTED: probable aquaporin PIP1-2 [Glycine max]
Glyma.08G019200.Wm82.a2.v1	240	261	261	134.421	0	0	2	5.67824	3.29745e-63	1.70651e-60	up	yes	chrChr08:1562560-1563070:+	.	.	.	.
Glyma.08G021700.Wm82.a2.v1	90	100	118	182.865	309	246	269	-1.18013	5.8696e-10	2.18415e-08	down	yes	chrChr08:1750378-1753017:+	gi|356523471|ref|XP_003530362.1|	1449	0	PREDICTED: high mobility group B protein 6 isoform 1 [Glycine max]
Glyma.08G021800.Wm82.a2.v1	66	120	66	60.2061	51	33	18	1.20455	0.000234859	0.00242969	up	yes	chrChr08:1760152-1761020:+	gi|571469571|ref|XP_006584758.1|	750	4e-97	PREDICTED: uncharacterized protein LOC100779644 [Glycine max]
Glyma.08G024400.Wm82.a2.v1	11	19	20	35.6418	68	52	52	-1.33378	2.56741e-05	0.000366731	down	yes	chrChr08:1938619-1939486:-	gi|571469602|ref|XP_006584768.1|	1077	6e-146	PREDICTED: uncharacterized protein LOC102662772 [Glycine max]
Glyma.08G031400.Wm82.a2.v1	1598	1488	1016	919.62	317	640	303	1.68021	5.00696e-11	2.21909e-09	up	yes	chrChr08:2480603-2482735:-	gi|356523868|ref|XP_003530556.1|	1682	0	PREDICTED: zinc finger CCCH domain-containing protein 20-like [Glycine max]
Glyma.08G031700.Wm82.a2.v1	727	808	750	519.764	261	228	264	1.72218	4.01753e-34	8.29114e-32	up	yes	chrChr08:2521939-2526748:-	gi|356527742|ref|XP_003532467.1|	2535	0	PREDICTED: 6-phosphofructokinase 3-like [Glycine max]
Glyma.08G032800.Wm82.a2.v1	80	85	70	57.0328	28	58	14	1.11555	0.00102556	0.00829676	up	yes	chrChr08:2616541-2617566:+	gi|734363590|gb|KHN16651.1|	659	5e-83	hypothetical protein glysoja_002748 [Glycine soja]
Glyma.08G033600.Wm82.a2.v1	459	566	486	322.765	109	105	150	2.10958	1.32922e-29	2.34102e-27	up	yes	chrChr08:2683887-2690396:+	gi|356523749|ref|XP_003530497.1|	2622	0	PREDICTED: uncharacterized protein LOC100817409 [Glycine max]
Glyma.08G033700.Wm82.a2.v1	247	260	237	146.403	39	30	30	2.86304	1.86491e-40	4.78882e-38	up	yes	chrChr08:2691132-2695840:+	gi|356527757|ref|XP_003532474.1|	1773	0	PREDICTED: uncharacterized protein LOC100803010 [Glycine max]
Glyma.08G039200.Wm82.a2.v1	1435	1200	1214	889.341	417	503	433	1.62523	1.55957e-27	2.48139e-25	up	yes	chrChr08:3067517-3072472:+	gi|356523743|ref|XP_003530494.1|	2553	0	PREDICTED: aldehyde dehydrogenase family 2 member C4-like [Glycine max]
Glyma.08G043600.Wm82.a2.v1	100	103	134	191.528	347	279	221	-1.07596	5.67249e-07	1.18226e-05	down	yes	chrChr08:3430640-3435445:-	gi|356524279|ref|XP_003530757.1|	2510	0	PREDICTED: endoglucanase 8-like [Glycine max]
Glyma.08G044000.Wm82.a2.v1	49	60	41	29.0646	1	8	8	2.3945	8.39875e-11	3.5899e-09	up	yes	chrChr08:3474223-3477593:+	gi|356524342|ref|XP_003530788.1|	2750	0	PREDICTED: probable pectinesterase/pectinesterase inhibitor 6-like [Glycine max]
Glyma.08G044100.Wm82.a2.v1	3620	3946	3943	2741.3	1452	1249	1880	1.4437	4.10844e-19	4.26555e-17	up	yes	chrChr08:3486866-3493700:-	gi|356524354|ref|XP_003530794.1|	3029	0	PREDICTED: phosphoglucomutase, cytoplasmic-like [Glycine max]
Glyma.08G044400.Wm82.a2.v1	598	1087	384	470.297	252	245	185	1.55847	1.39735e-08	4.00727e-07	up	yes	chrChr08:3511249-3515527:-	gi|356524378|ref|XP_003530806.1|	2537	0	PREDICTED: uncharacterized protein LOC100788183 [Glycine max]
Glyma.08G045100.Wm82.a2.v1	578	552	519	926.543	1288	1363	1419	-1.10565	4.88126e-18	4.65158e-16	down	yes	chrChr08:3575179-3577135:-	gi|351727497|ref|NP_001235883.1|	992	1e-133	uncharacterized protein LOC100527680 [Glycine max]
Glyma.08G045200.Wm82.a2.v1	259	441	244	219.59	129	133	81	1.46853	6.40942e-09	1.96184e-07	up	yes	chrChr08:3581815-3583645:-	gi|351727819|ref|NP_001236150.1|	897	6e-118	uncharacterized protein LOC100527186 [Glycine max]
Glyma.08G045300.Wm82.a2.v1	125	86	92	74.1463	53	51	29	1.19734	1.28689e-05	0.000197941	up	yes	chrChr08:3589380-3590322:+	gi|356524483|ref|XP_003530858.1|	280	4e-28	PREDICTED: uncharacterized protein LOC100820614 [Glycine max]
Glyma.08G047300.Wm82.a2.v1	221	209	232	160.614	95	100	87	1.33234	5.00744e-13	2.93971e-11	up	yes	chrChr08:3694731-3702332:-	gi|571469966|ref|XP_006584883.1|	3142	0	PREDICTED: MACPF domain-containing protein At1g14780-like [Glycine max]
Glyma.08G048200.Wm82.a2.v1	362	363	365	629.601	858	1027	914	-1.15583	2.45398e-16	2.02824e-14	down	yes	chrChr08:3758072-3759443:-	gi|356524632|ref|XP_003530932.1|	732	3e-92	PREDICTED: 40S ribosomal protein S16-like [Glycine max]
Glyma.08G055600.Wm82.a2.v1	4140	4154	3938	2789.95	1259	1412	1402	1.72269	1.62776e-48	5.07001e-46	up	yes	chrChr08:4273355-4280318:-	gi|356524704|ref|XP_003530968.1|	1924	0	PREDICTED: TPR repeat-containing thioredoxin TDX-like [Glycine max]
Glyma.08G056400.Wm82.a2.v1	5610	5611	5973	3566.08	1106	1263	1082	2.4342	1.4518e-87	1.10993e-84	up	yes	chrChr08:4330055-4332640:-	gi|356524720|ref|XP_003530976.1|	1692	0	PREDICTED: purple acid phosphatase 17-like isoform 1 [Glycine max]
Glyma.08G056500.Wm82.a2.v1	1483	1291	1260	1017.73	671	599	698	1.17538	8.5683e-18	7.91838e-16	up	yes	chrChr08:4333595-4336158:-	gi|356524724|ref|XP_003530978.1|	1681	0	PREDICTED: annexin D5 [Glycine max]
Glyma.08G062800.Wm82.a2.v1	59	45	9	24.4399	10	11	8	1.36997	0.000673276	0.00584624	up	yes	chrChr08:4833755-4836533:-	gi|571470185|ref|XP_006584944.1|	1957	0	PREDICTED: probably inactive leucine-rich repeat receptor-like protein kinase At5g48380-like isoform X1 [Glycine max]
Glyma.08G069100.Wm82.a2.v1	315	94	152	125.114	39	63	65	1.56695	1.60783e-06	3.05741e-05	up	yes	chrChr08:5279191-5280167:+	gi|734432276|gb|KHN46265.1|	152	7e-10	hypothetical protein glysoja_034593 [Glycine soja]
Glyma.08G069200.Wm82.a2.v1	361	94	195	141.575	54	67	51	1.71058	1.44578e-07	3.41011e-06	up	yes	chrChr08:5282268-5283248:+	gi|351724663|ref|NP_001238089.1|	129	2e-06	uncharacterized protein LOC100527317 [Glycine max]
Glyma.08G072000.Wm82.a2.v1	96	107	86	66.9355	41	29	33	1.49237	4.48764e-09	1.40952e-07	up	yes	chrChr08:5507978-5512151:+	gi|356524830|ref|XP_003531031.1|	1341	0	PREDICTED: tobamovirus multiplication protein 1 isoform X1 [Glycine max]
Glyma.08G072200.Wm82.a2.v1	1373	1912	1314	1138.87	813	732	567	1.22832	4.05422e-11	1.83306e-09	up	yes	chrChr08:5530937-5533495:+	gi|32130598|gb|AAP68983.1|	1635	0	alternative oxidase 2b [Glycine max]
Glyma.08G075500.Wm82.a2.v1	154	142	180	260.114	333	442	352	-1.01749	5.57555e-08	1.42303e-06	down	yes	chrChr08:5772026-5773209:+	gi|823159976|ref|XP_012479828.1|	549	5e-67	PREDICTED: 60S ribosomal protein L44-like [Gossypium raimondii]
Glyma.08G075900.Wm82.a2.v1	11	16	36	12.186	0	5	2	1.66234	7.95031e-05	0.000975348	up	yes	chrChr08:5797549-5798562:-	gi|351722179|ref|NP_001236723.1|	958	3e-127	uncharacterized protein LOC100527486 [Glycine max]
Glyma.08G076400.Wm82.a2.v1	61	109	72	159.11	282	161	304	-1.29294	1.0384e-06	2.06691e-05	down	yes	chrChr08:5820082-5823926:+	gi|571469034|ref|XP_006584560.1|	2626	0	PREDICTED: uncharacterized protein LOC100792053 isoform X1 [Glycine max]
Glyma.08G087900.Wm82.a2.v1	55	67	39	122.502	211	166	226	-1.58344	2.23201e-11	1.06349e-09	down	yes	chrChr08:6661361-6667037:+	gi|356524988|ref|XP_003531109.1|	2274	0	PREDICTED: polygalacturonase At1g48100-like [Glycine max]
Glyma.08G093500.Wm82.a2.v1	1301	1177	1172	776.543	330	247	281	2.18918	9.18881e-49	2.91606e-46	up	yes	chrChr08:7088454-7092027:+	gi|255636461|gb|ACU18569.1|	1702	0	unknown [Glycine max]
Glyma.08G093600.Wm82.a2.v1	1311	1478	1494	898.69	314	256	358	2.29485	2.67999e-49	8.75265e-47	up	yes	chrChr08:7092593-7098413:+	gi|356525044|ref|XP_003531137.1|	1726	0	PREDICTED: purple acid phosphatase 8-like [Glycine max]
Glyma.08G094500.Wm82.a2.v1	942	868	1033	680.491	365	440	346	1.42442	3.00844e-20	3.40744e-18	up	yes	chrChr08:7184460-7192472:+	gi|356525056|ref|XP_003531143.1|	1964	0	PREDICTED: uncharacterized protein LOC100792580 [Glycine max]
Glyma.08G099500.Wm82.a2.v1	1245	1536	1084	995.35	681	609	728	1.06698	3.8719e-11	1.76247e-09	up	yes	chrChr08:7605286-7615352:+	gi|571470705|ref|XP_006585092.1|	4693	0	PREDICTED: cell wall protein AWA1-like [Glycine max]
Glyma.08G099800.Wm82.a2.v1	26	24	9	12.2637	5	6	1	1.40112	0.000759414	0.0064659	up	yes	chrChr08:7636648-7639681:+	gi|571470709|ref|XP_003531167.2|	1338	0	PREDICTED: uncharacterized protein LOC100804600 [Glycine max]
Glyma.08G100000.Wm82.a2.v1	240	251	239	430.264	649	647	635	-1.19857	2.18159e-18	2.15843e-16	down	yes	chrChr08:7667678-7669517:-	gi|593792686|ref|XP_007159382.1|	364	3e-38	hypothetical protein PHAVU_002G233500g, partial [Phaseolus vulgaris]
Glyma.08G114700.Wm82.a2.v1	364	501	289	279.286	146	140	202	1.3032	7.55483e-09	2.2813e-07	up	yes	chrChr08:8768854-8772973:-	gi|356528314|ref|XP_003532749.1|	3228	0	PREDICTED: uncharacterized protein LOC100782887 [Glycine max]
Glyma.08G118000.Wm82.a2.v1	415	417	406	258.57	92	115	53	2.23088	1.03924e-22	1.37094e-20	up	yes	chrChr08:9100408-9102619:-	gi|356525302|ref|XP_003531264.1|	1108	1e-143	PREDICTED: uncharacterized protein LOC100814411 [Glycine max]
Glyma.08G118100.Wm82.a2.v1	9	1	8	18.9897	33	56	12	-1.33826	0.00126669	0.00981347	down	yes	chrChr08:9127089-9128533:+	gi|356525304|ref|XP_003531265.1|	871	1e-115	PREDICTED: uncharacterized protein LOC100814945 [Glycine max]
Glyma.08G118800.Wm82.a2.v1	179	158	203	122.818	84	50	44	1.60723	7.79908e-11	3.34634e-09	up	yes	chrChr08:9178070-9180053:+	gi|734436316|gb|KHN48020.1|	1090	1e-146	Glutathione transferase GST 23 [Glycine soja]
Glyma.08G127100.Wm82.a2.v1	10	15	15	7.8242	0	4	1	1.46734	0.000517954	0.00469382	up	yes	chrChr08:9789136-9790732:-	gi|571474884|ref|XP_006586379.1|	1623	0	PREDICTED: uncharacterized protein LOC100811367 [Glycine max]
Glyma.08G128100.Wm82.a2.v1	8	5	6	21.181	37	50	27	-1.73535	3.53795e-06	6.18572e-05	down	yes	chrChr08:9876932-9878095:-	gi|351727609|ref|NP_001235375.1|	650	3e-83	uncharacterized protein LOC100305948 precursor [Glycine max]
Glyma.08G129300.Wm82.a2.v1	207	70	120	87.8426	36	44	34	1.63803	2.2289e-07	5.09015e-06	up	yes	chrChr08:9956936-9958205:-	gi|356525395|ref|XP_003531310.1|	1017	2e-137	PREDICTED: CASP-like protein 9-like [Glycine max]
Glyma.08G130600.Wm82.a2.v1	11	9	24	9.46103	4	1	6	1.15405	0.00608843	0.0350285	up	yes	chrChr08:10025431-10029305:-	gi|356528434|ref|XP_003532808.1|	2883	0	PREDICTED: uncharacterized protein LOC100818309 [Glycine max]
Glyma.08G132900.Wm82.a2.v1	24	29	31	18.8644	3	14	9	1.3008	0.000725097	0.00621327	up	yes	chrChr08:10185306-10186015:-	.	.	.	.
Glyma.08G137400.Wm82.a2.v1	234	202	231	126.684	13	28	18	3.28554	2.49875e-38	5.96138e-36	up	yes	chrChr08:10511876-10513544:+	.	.	.	.
Glyma.08G138600.Wm82.a2.v1	646	584	644	360.293	55	87	52	3.23283	2.52053e-58	1.16148e-55	up	yes	chrChr08:10617697-10624786:+	gi|356525501|ref|XP_003531363.1|	3429	0	PREDICTED: sulfate transporter 2.1-like isoformX1 [Glycine max]
Glyma.08G140000.Wm82.a2.v1	69	51	68	47.4771	35	31	26	1.05059	0.000187044	0.00200637	up	yes	chrChr08:10707736-10708422:+	.	.	.	.
Glyma.08G140900.Wm82.a2.v1	234	225	252	143.427	44	35	38	2.58918	6.47856e-35	1.36208e-32	up	yes	chrChr08:10760962-10769630:-	gi|356525527|ref|XP_003531376.1|	3675	0	PREDICTED: uncharacterized aarF domain-containing protein kinase At1g79600, chloroplastic-like [Glycine max]
Glyma.08G146100.Wm82.a2.v1	70	88	116	53.3495	19	12	2	2.45824	3.79008e-12	2.00148e-10	up	yes	chrChr08:11119305-11124078:+	gi|356525576|ref|XP_003531400.1|	1720	0	PREDICTED: WAT1-related protein At5g64700-like [Glycine max]
Glyma.08G148000.Wm82.a2.v1	1302	1356	1048	849.476	405	469	387	1.66417	3.72004e-26	5.71408e-24	up	yes	chrChr08:11287298-11290903:+	gi|356525598|ref|XP_003531411.1|	2939	0	PREDICTED: peptide transporter PTR2-like [Glycine max]
Glyma.08G151100.Wm82.a2.v1	462	303	273	254.112	168	163	125	1.25611	2.15631e-08	5.94557e-07	up	yes	chrChr08:11627319-11628691:+	gi|255630536|gb|ACU15626.1|	209	2e-17	unknown [Glycine max]
Glyma.08G153400.Wm82.a2.v1	227	211	194	158.021	91	106	102	1.18534	3.10021e-10	1.21548e-08	up	yes	chrChr08:11839986-11840569:+	.	.	.	.
Glyma.08G155000.Wm82.a2.v1	236	256	259	194.646	147	127	126	1.0339	1.99559e-09	6.74671e-08	up	yes	chrChr08:11960342-11967913:+	gi|571471610|ref|XP_006585353.1|	1551	0	PREDICTED: uncharacterized protein LOC100820089 isoform X1 [Glycine max]
Glyma.08G156300.Wm82.a2.v1	1	14	8	19.502	32	26	41	-1.26213	0.00160607	0.0119159	down	yes	chrChr08:12084824-12088455:+	gi|571471625|ref|XP_003532883.2|	3267	0	PREDICTED: uncharacterized protein LOC100778947 [Glycine max]
Glyma.08G158100.Wm82.a2.v1	898	640	206	347.754	144	79	37	1.55344	0.000222139	0.00231726	up	yes	chrChr08:12250248-12251336:-	gi|356525691|ref|XP_003531457.1|	360	5e-39	PREDICTED: uncharacterized protein LOC100305767 [Glycine max]
Glyma.08G159100.Wm82.a2.v1	624	684	691	401.399	95	125	97	2.70844	8.90414e-58	4.04765e-55	up	yes	chrChr08:12343496-12345747:-	gi|734376537|gb|KHN21339.1|	2839	0	hypothetical protein glysoja_026540 [Glycine soja]
Glyma.08G159900.Wm82.a2.v1	428	524	671	942.986	1354	1238	1615	-1.14347	4.29924e-10	1.6323e-08	down	yes	chrChr08:12394459-12399478:+	gi|356525708|ref|XP_003531465.1|	2165	0	PREDICTED: ATP-citrate synthase alpha chain protein 1-like isoform X1 [Glycine max]
Glyma.08G164500.Wm82.a2.v1	233	222	128	105.462	3	9	6	4.13893	6.46321e-38	1.48915e-35	up	yes	chrChr08:12954625-12956940:-	gi|356528653|ref|XP_003532914.1|	1327	1e-180	PREDICTED: uncharacterized protein LOC100795419 [Glycine max]
Glyma.08G168100.Wm82.a2.v1	144	123	139	103.353	78	76	50	1.07086	3.39132e-06	5.95722e-05	up	yes	chrChr08:13246042-13249420:-	gi|356528685|ref|XP_003532930.1|	1810	0	PREDICTED: myb-related protein Zm1-like [Glycine max]
Glyma.08G169100.Wm82.a2.v1	51	57	81	105.468	167	183	112	-1.00407	8.59729e-05	0.00104368	down	yes	chrChr08:13479149-13481496:+	gi|363807822|ref|NP_001242438.1|	1919	0	uncharacterized protein LOC100803722 [Glycine max]
Glyma.08G173300.Wm82.a2.v1	97	106	80	165.716	243	194	305	-1.13027	2.45488e-07	5.57594e-06	down	yes	chrChr08:13790824-13792888:+	gi|356528716|ref|XP_003532945.1|	1556	0	PREDICTED: ribosomal L1 domain-containing protein 1-like [Glycine max]
Glyma.08G174400.Wm82.a2.v1	61	73	74	50.8097	40	39	12	1.1115	0.00070051	0.00604365	up	yes	chrChr08:13933050-13938296:+	gi|571471881|ref|XP_006585434.1|	1895	0	PREDICTED: protein kinase PINOID-like isoform X1 [Glycine max]
Glyma.08G175200.Wm82.a2.v1	856	564	664	399.858	57	110	42	3.09031	5.12506e-31	9.57788e-29	up	yes	chrChr08:13981187-13982765:-	gi|351727282|ref|NP_001238691.1|	1037	4e-139	glutathione S-transferase [Glycine max]
Glyma.08G175700.Wm82.a2.v1	22	17	18	38.1524	62	50	68	-1.25991	3.07113e-05	0.0004301	down	yes	chrChr08:14032115-14035374:-	gi|356525835|ref|XP_003531527.1|	1578	0	PREDICTED: tricin synthase 1-like [Glycine max]
Glyma.08G181000.Wm82.a2.v1	4175	3064	2758	5568.23	7072	5017	12281	-1.00151	7.74847e-05	0.000952671	down	yes	chrChr08:14523562-14525363:-	gi|359807261|ref|NP_001240857.1|	2454	0	soyasaponin III rhamnosyltransferase [Glycine max]
Glyma.08G182900.Wm82.a2.v1	83	65	107	46.9378	4	8	1	3.30904	7.38931e-21	8.90928e-19	up	yes	chrChr08:14680507-14683313:+	gi|356525918|ref|XP_003531568.1|	2018	0	PREDICTED: WAT1-related protein At1g68170-like [Glycine max]
Glyma.08G184300.Wm82.a2.v1	151	114	104	229.182	316	359	375	-1.26303	6.50215e-11	2.82591e-09	down	yes	chrChr08:14784345-14786953:+	gi|571468853|ref|XP_006584472.1|	1135	3e-153	PREDICTED: uncharacterized protein LOC100305462 isoform X1 [Glycine max]
Glyma.08G186000.Wm82.a2.v1	0	2	0	7.82152	24	7	17	-1.6445	9.73308e-05	0.00116144	down	yes	chrChr08:14902002-14904871:-	gi|356525952|ref|XP_003531585.1|	1183	2e-160	PREDICTED: transmembrane emp24 domain-containing protein p24delta3-like [Glycine max]
Glyma.08G191100.Wm82.a2.v1	39	58	39	31.5748	17	14	18	1.34573	3.29091e-05	0.000457073	up	yes	chrChr08:15361895-15363999:-	gi|571472146|ref|XP_006585514.1|	657	8e-80	PREDICTED: pumilio homolog 24-like [Glycine max]
Glyma.08G191300.Wm82.a2.v1	122	189	91	97.4544	48	63	60	1.23554	6.18103e-06	0.000102527	up	yes	chrChr08:15373388-15378072:+	gi|356528831|ref|XP_003533001.1|	2706	0	PREDICTED: uncharacterized protein LOC100805874 [Glycine max]
Glyma.08G192700.Wm82.a2.v1	61	64	55	101.21	141	119	185	-1.03721	1.09847e-05	0.000172268	down	yes	chrChr08:15496992-15503702:-	gi|356526013|ref|XP_003531614.1|	2864	0	PREDICTED: chaperonin CPN60-like 2, mitochondrial-like isoform X1 [Glycine max]
Glyma.08G194900.Wm82.a2.v1	18	21	10	10.6513	5	3	5	1.26245	0.00209854	0.0148211	up	yes	chrChr08:15704811-15707020:-	gi|356526037|ref|XP_003531626.1|	1474	0	PREDICTED: inorganic pyrophosphatase 2-like [Glycine max]
Glyma.08G195000.Wm82.a2.v1	4295	4560	2967	2101.09	45	46	39	6.24097	1.02354e-203	4.30385e-200	up	yes	chrChr08:15709167-15711390:-	gi|356526039|ref|XP_003531627.1|	1303	1e-176	PREDICTED: inorganic pyrophosphatase 2 [Glycine max]
Glyma.08G195100.Wm82.a2.v1	14096	13565	11562	6965.36	144	115	129	6.60517	0	0	up	yes	chrChr08:15713265-15715636:-	gi|356526041|ref|XP_003531628.1|	1455	0	PREDICTED: inorganic pyrophosphatase 2-like [Glycine max]
Glyma.08G195300.Wm82.a2.v1	72	56	53	40.4795	16	20	19	1.60285	1.05139e-07	2.54079e-06	up	yes	chrChr08:15746350-15748416:+	gi|734347242|gb|KHN11305.1|	857	3e-107	Dof zinc finger protein DOF1.7 [Glycine soja]
Glyma.08G200100.Wm82.a2.v1	22437	17681	21936	13942.5	7470	5883	5960	1.79743	3.27582e-33	6.55924e-31	up	yes	chrChr08:16183201-16185271:+	gi|359806656|ref|NP_001241536.1|	1301	5e-178	stem 31 kDa glycoprotein precursor [Glycine max]
Glyma.08G200200.Wm82.a2.v1	50253	68378	61303	43459.7	23453	26460	25585	1.38095	5.4101e-22	6.86757e-20	up	yes	chrChr08:16187816-16191151:+	gi|734325740|gb|KHN05326.1|	1181	9e-160	Stem 28 kDa glycoprotein [Glycine soja]
Glyma.08G204500.Wm82.a2.v1	17	9	13	25.4662	33	23	63	-1.04912	0.00498001	0.0297977	down	yes	chrChr08:16572086-16580213:-	gi|356526129|ref|XP_003531672.1|	2335	0	PREDICTED: probable plastidic glucose transporter 3-like isoform X1 [Glycine max]
Glyma.08G207100.Wm82.a2.v1	99	99	60	49.795	8	9	11	2.73838	2.15092e-17	1.94502e-15	up	yes	chrChr08:16724687-16728969:-	gi|356526155|ref|XP_003531685.1|	3288	0	PREDICTED: probable sulfate transporter 3.4-like [Glycine max]
Glyma.08G212200.Wm82.a2.v1	136	187	205	124.946	66	80	59	1.41134	8.25134e-10	2.96229e-08	up	yes	chrChr08:17126244-17129367:+	gi|571472510|ref|XP_006585628.1|	716	3e-92	PREDICTED: uncharacterized protein LOC100788011 isoform X2 [Glycine max]
Glyma.08G218600.Wm82.a2.v1	749	691	946	542.251	306	356	120	1.56552	1.31856e-08	3.8237e-07	up	yes	chrChr08:17784425-17786833:+	gi|255637165|gb|ACU18913.1|	1325	1e-177	unknown [Glycine max]
Glyma.08G220000.Wm82.a2.v1	4836	4060	2305	2311.76	1047	685	444	2.249	5.81904e-17	5.07116e-15	up	yes	chrChr08:17875817-17877391:-	gi|359806152|ref|NP_001241196.1|	461	3e-52	uncharacterized protein LOC100804784 [Glycine max]
Glyma.08G222100.Wm82.a2.v1	1073	1221	1037	1801.69	2429	2581	2765	-1.02695	1.74198e-15	1.31682e-13	down	yes	chrChr08:18026866-18029025:-	gi|571472621|ref|XP_006585662.1|	1071	2e-142	PREDICTED: 60S ribosomal protein L7-4-like [Glycine max]
Glyma.08G232500.Wm82.a2.v1	32	17	16	42.5139	78	54	67	-1.19922	0.000134758	0.00153457	down	yes	chrChr08:19156965-19158421:+	gi|358249266|ref|NP_001240276.1|	933	2e-124	uncharacterized protein LOC100792950 precursor [Glycine max]
Glyma.08G232900.Wm82.a2.v1	2	4	3	11.7889	8	34	23	-1.45213	0.000521899	0.00472448	down	yes	chrChr08:19300400-19303730:-	gi|356526407|ref|XP_003531809.1|	1764	0	PREDICTED: uncharacterized protein LOC100793991 [Glycine max]
Glyma.08G236000.Wm82.a2.v1	325	311	337	252.61	159	194	167	1.0314	5.717e-10	2.13445e-08	up	yes	chrChr08:19946007-19949985:-	gi|358248144|ref|NP_001239824.1|	956	7e-128	uncharacterized protein LOC100798757 [Glycine max]
Glyma.08G240400.Wm82.a2.v1	880	1041	1156	576.261	43	106	73	3.61041	7.01519e-52	2.62204e-49	up	yes	chrChr08:20496300-20505610:-	gi|356523578|ref|XP_003530414.1|	1468	0	PREDICTED: SNF1-related protein kinase catalytic subunit alpha KIN10-like isoform X1 [Glycine max]
Glyma.08G243100.Wm82.a2.v1	19	7	9	23.3381	45	32	33	-1.10561	0.00244498	0.0167543	down	yes	chrChr08:20824067-20827808:+	gi|571472931|ref|XP_006585766.1|	1716	0	PREDICTED: uncharacterized protein KIAA1211-like [Glycine max]
Glyma.08G245000.Wm82.a2.v1	124	129	146	230.189	326	379	318	-1.13411	9.29802e-11	3.92442e-09	down	yes	chrChr08:21160139-21161097:-	gi|590583591|ref|XP_007014942.1|	712	8e-91	Histone superfamily protein [Theobroma cacao]
Glyma.08G250800.Wm82.a2.v1	9	9	13	6.55326	2	4	1	1.13018	0.00749376	0.0411295	up	yes	chrChr08:21975176-21987424:+	gi|571469021|ref|XP_006584554.1|	1106	7e-149	PREDICTED: uncharacterized protein LOC100786580 isoform X1 [Glycine max]
Glyma.08G251700.Wm82.a2.v1	4152	4428	4644	3050.81	840	2153	1620	1.52869	4.99775e-10	1.87843e-08	up	yes	chrChr08:22065007-22066071:-	gi|358248476|ref|NP_001239632.1|	497	2e-59	uncharacterized protein LOC100789250 [Glycine max]
Glyma.08G252500.Wm82.a2.v1	60	65	45	95.7878	110	139	172	-1.02888	3.53073e-05	0.000486365	down	yes	chrChr08:22174301-22179910:+	gi|571473078|ref|XP_006585817.1|	2421	0	PREDICTED: protein ROOT INITIATION DEFECTIVE 3-like [Glycine max]
Glyma.08G255800.Wm82.a2.v1	50	35	36	73.1418	133	107	92	-1.1482	8.8153e-06	0.000141209	down	yes	chrChr08:22681557-22684415:-	gi|571473113|ref|XP_006585825.1|	1889	0	PREDICTED: S-adenosylmethionine decarboxylase proenzyme-like isoform X1 [Glycine max]
Glyma.08G262400.Wm82.a2.v1	62	76	60	44.372	21	21	19	1.61518	2.08439e-08	5.76619e-07	up	yes	chrChr08:27189965-27191431:-	gi|734358392|gb|KHN14843.1|	518	1e-62	CLAVATA3/ESR (CLE)-related protein 27 [Glycine soja]
Glyma.08G271400.Wm82.a2.v1	1140	1013	687	710.945	523	520	307	1.14811	4.22201e-07	9.03462e-06	up	yes	chrChr08:35431000-35434162:-	gi|734343011|gb|KHN10164.1|	568	8e-68	hypothetical protein glysoja_043185 [Glycine soja]
Glyma.08G271900.Wm82.a2.v1	2427	1864	1701	1461.79	1171	826	609	1.27912	3.46175e-09	1.11971e-07	up	yes	chrChr08:35596859-35599562:+	gi|356526715|ref|XP_003531962.1|	2920	0	PREDICTED: transcription factor MYC2 [Glycine max]
Glyma.08G273600.Wm82.a2.v1	153	133	119	94.8108	34	66	50	1.4367	2.21363e-08	6.08865e-07	up	yes	chrChr08:36133852-36135254:-	gi|356526731|ref|XP_003531970.1|	622	4e-78	PREDICTED: uncharacterized protein At5g65660-like [Glycine max]
Glyma.08G276600.Wm82.a2.v1	3	6	7	12.664	16	15	32	-1.1318	0.0053516	0.0315445	down	yes	chrChr08:36983375-36984457:+	gi|734410692|gb|KHN35639.1|	328	7e-31	Pentatricopeptide repeat-containing protein, chloroplastic [Glycine soja]
Glyma.08G284100.Wm82.a2.v1	179	176	172	122.888	80	61	52	1.50928	2.07143e-12	1.12752e-10	up	yes	chrChr08:39178641-39183388:+	gi|571468833|ref|XP_006584462.1|	2998	0	PREDICTED: protein kinase family protein isoform X1 [Glycine max]
Glyma.08G286700.Wm82.a2.v1	208	168	152	128.932	78	84	68	1.27594	2.65335e-09	8.76778e-08	up	yes	chrChr08:39679450-39685642:+	gi|571473536|ref|XP_006585949.1|	1360	0	PREDICTED: carbonic anhydrase, chloroplastic-like [Glycine max]
Glyma.08G291600.Wm82.a2.v1	2205	2268	1751	1414.6	828	530	687	1.69648	1.87349e-21	2.32554e-19	up	yes	chrChr08:40541830-40548480:-	gi|356526862|ref|XP_003532035.1|	3309	0	PREDICTED: probable inactive purple acid phosphatase 1-like isoform X1 [Glycine max]
Glyma.08G295600.Wm82.a2.v1	35	41	55	78.3184	86	135	132	-1.1162	3.33291e-05	0.000461952	down	yes	chrChr08:41048009-41049443:-	gi|734353695|gb|KHN13477.1|	568	4e-70	Thioredoxin H2 [Glycine soja]
Glyma.08G303000.Wm82.a2.v1	89	87	60	160.003	228	199	331	-1.37669	1.06712e-08	3.14334e-07	down	yes	chrChr08:42114246-42121684:+	gi|356524181|ref|XP_003530710.1|	2716	0	PREDICTED: DEAD-box ATP-dependent RNA helicase 53-like [Glycine max]
Glyma.08G308300.Wm82.a2.v1	14	11	17	25.5109	44	38	34	-1.03549	0.00206502	0.0146273	down	yes	chrChr08:42705209-42708993:+	gi|356524223|ref|XP_003530730.1|	2033	0	PREDICTED: GDSL esterase/lipase At4g10955-like [Glycine max]
Glyma.08G312400.Wm82.a2.v1	9290	10614	9722	7670.09	5113	4890	5716	1.06288	1.76853e-18	1.7601e-16	up	yes	chrChr08:43213164-43217852:-	gi|356500360|ref|XP_003519000.1|	1889	0	PREDICTED: glucose-6-phosphate/phosphate translocator 1, chloroplastic [Glycine max]
Glyma.08G318400.Wm82.a2.v1	3	2	4	12.036	30	21	16	-1.62913	6.69379e-05	0.000844925	down	yes	chrChr08:43775538-43779231:+	gi|356527064|ref|XP_003532134.1|	1771	0	PREDICTED: GDSL esterase/lipase At5g55050 [Glycine max]
Glyma.08G327100.Wm82.a2.v1	6	10	4	32.5094	80	35	71	-2.22106	1.50447e-09	5.18004e-08	down	yes	chrChr08:44524192-44526376:-	gi|356527134|ref|XP_003532168.1|	2479	0	PREDICTED: cytochrome P450 71D11 [Glycine max]
Glyma.08G329600.Wm82.a2.v1	44	36	40	87.7105	149	158	119	-1.51074	2.29702e-10	9.12272e-09	down	yes	chrChr08:44745426-44746578:+	gi|571474154|ref|XP_006586139.1|	153	4e-09	PREDICTED: mucin-1-like [Glycine max]
Glyma.08G330100.Wm82.a2.v1	0	2	3	6.98654	10	18	11	-1.2729	0.00260609	0.0176285	down	yes	chrChr08:44771748-44776408:-	gi|571474159|ref|XP_006586140.1|	1733	0	PREDICTED: nudix hydrolase 10-like isoform X2 [Glycine max]
Glyma.08G332000.Wm82.a2.v1	255	227	204	392.162	548	448	741	-1.09745	5.02953e-08	1.29448e-06	down	yes	chrChr08:44937110-44943950:-	gi|356524384|ref|XP_003530809.1|	2806	0	PREDICTED: putative ribosomal RNA methyltransferase NOP2-like [Glycine max]
Glyma.08G333800.Wm82.a2.v1	7	8	4	15.5036	35	19	24	-1.27364	0.00108464	0.0086645	down	yes	chrChr08:45115194-45120675:-	gi|571474311|ref|XP_006586192.1|	2484	0	PREDICTED: cell division control protein 6 homolog [Glycine max]
Glyma.08G336300.Wm82.a2.v1	19	19	28	44.8718	86	73	54	-1.28829	1.91724e-05	0.000280776	down	yes	chrChr08:45319384-45321356:-	gi|571474275|ref|XP_003530828.2|	1176	3e-157	PREDICTED: uncharacterized protein LOC100801421 [Glycine max]
Glyma.08G340200.Wm82.a2.v1	1609	1807	1836	1352.8	953	859	931	1.08499	9.95238e-19	1.0084e-16	up	yes	chrChr08:45635137-45644160:-	gi|571474331|ref|XP_003532226.2|	3060	0	PREDICTED: dynamin-related protein 1E-like isoform 1 [Glycine max]
Glyma.08G345500.Wm82.a2.v1	18	23	42	18.516	7	10	8	1.33511	0.000503342	0.00458487	up	yes	chrChr08:46045785-46047909:-	gi|356524461|ref|XP_003530847.1|	1967	0	PREDICTED: serine/threonine-protein kinase OXI1-like [Glycine max]
Glyma.08G347400.Wm82.a2.v1	105	116	127	190.601	293	271	264	-1.02993	4.44145e-09	1.40083e-07	down	yes	chrChr08:46184848-46189601:-	gi|356524467|ref|XP_003530850.1|	2337	0	PREDICTED: uncharacterized protein LOC100816351 [Glycine max]
Glyma.08G352100.Wm82.a2.v1	23	32	22	18.223	12	5	13	1.10713	0.00330408	0.021403	up	yes	chrChr08:46524724-46529536:-	gi|571475381|ref|XP_003530863.2|	4459	0	PREDICTED: uncharacterized protein LOC100777856 [Glycine max]
Glyma.08G366700.Wm82.a2.v1	30	21	27	50.4295	96	84	55	-1.21274	4.2588e-05	0.00057122	down	yes	chrChr08:47738806-47739713:-	gi|351734438|ref|NP_001236259.1|	691	6e-88	uncharacterized protein LOC100527707 [Glycine max]
Glyma.09G000700.Wm82.a2.v1	185	208	135	466.535	704	817	868	-1.90597	6.56246e-25	9.43395e-23	down	yes	chrChr09:57906-61439:+	gi|734370806|gb|KHN19422.1|	1939	0	60S ribosomal protein L3 [Glycine soja]
Glyma.09G008700.Wm82.a2.v1	4	21	23	36.7563	46	62	73	-1.30412	0.000363679	0.00349038	down	yes	chrChr09:681588-686136:+	gi|356532325|ref|XP_003534724.1|	1128	9e-153	PREDICTED: RPM1-interacting protein 4-like [Glycine max]
Glyma.09G008800.Wm82.a2.v1	94	74	78	142.541	267	176	193	-1.10734	5.63342e-07	1.17539e-05	down	yes	chrChr09:686880-691254:+	gi|571475768|ref|XP_006586764.1|	2738	0	PREDICTED: EH domain-containing protein 1-like [Glycine max]
Glyma.09G009700.Wm82.a2.v1	35	25	29	16.3048	0	2	2	2.61748	9.96639e-11	4.18029e-09	up	yes	chrChr09:763567-765734:-	gi|571475779|ref|XP_006586767.1|	1442	0	PREDICTED: uncharacterized protein LOC100811764 [Glycine max]
Glyma.09G010500.Wm82.a2.v1	4381	3222	3401	6975.42	13072	6717	12510	-1.278	5.677e-09	1.75201e-07	down	yes	chrChr09:812535-814841:+	.	.	.	.
Glyma.09G011100.Wm82.a2.v1	465	465	452	285.283	94	81	94	2.43154	5.9397e-49	1.90291e-46	up	yes	chrChr09:847912-852938:+	gi|734420434|gb|KHN40821.1|	1345	0	Inositol monophosphatase 3 [Glycine soja]
Glyma.09G012400.Wm82.a2.v1	29	29	29	50.7611	84	68	75	-1.07384	5.87429e-05	0.000752782	down	yes	chrChr09:944726-947561:-	gi|356532690|ref|XP_003534904.1|	1643	0	PREDICTED: putative uncharacterized protein DDB_G0287113 [Glycine max]
Glyma.09G013100.Wm82.a2.v1	51	38	23	26.4333	19	11	13	1.18993	0.000855628	0.00714028	up	yes	chrChr09:996259-1002096:+	gi|571475821|ref|XP_006586778.1|	2363	0	PREDICTED: microtubule-associated protein 70-5-like [Glycine max]
Glyma.09G014700.Wm82.a2.v1	584	505	595	342.875	77	155	64	2.40284	5.1457e-21	6.27161e-19	up	yes	chrChr09:1126845-1129049:+	gi|571475438|ref|XP_006586627.1|	851	3e-108	PREDICTED: uncharacterized protein LOC100499880 isoform X1 [Glycine max]
Glyma.09G018100.Wm82.a2.v1	4	6	6	12.8206	20	22	22	-1.22698	0.00183315	0.0132614	down	yes	chrChr09:1416403-1420543:-	gi|571475921|ref|XP_006586809.1|	2273	0	PREDICTED: protein ENDOSPERM DEFECTIVE 1-like [Glycine max]
Glyma.09G023100.Wm82.a2.v1	27	32	24	54.271	90	70	94	-1.2701	3.16905e-06	5.60483e-05	down	yes	chrChr09:1843597-1848696:+	gi|356533031|ref|XP_003535072.1|	2314	0	PREDICTED: U3 small nucleolar RNA-interacting protein 2-like isoform 1 [Glycine max]
Glyma.09G023800.Wm82.a2.v1	1101	1036	1371	729.081	254	242	218	2.37582	1.81603e-49	6.04846e-47	up	yes	chrChr09:1936217-1941895:-	gi|356533053|ref|XP_003535083.1|	1023	8e-135	PREDICTED: nuclear transcription factor Y subunit A-7-like isoformX2 [Glycine max]
Glyma.09G025500.Wm82.a2.v1	12	5	13	23.2542	40	37	38	-1.34672	0.000159666	0.00176214	down	yes	chrChr09:2078756-2081896:+	gi|571476049|ref|XP_006586848.1|	3177	0	PREDICTED: uncharacterized protein LOC100792980 isoform X1 [Glycine max]
Glyma.09G027000.Wm82.a2.v1	135	134	196	110.103	79	71	31	1.32955	3.57895e-06	6.25091e-05	up	yes	chrChr09:2204112-2206207:+	gi|356533131|ref|XP_003535121.1|	2797	0	PREDICTED: reticuline oxidase-like protein-like [Glycine max]
Glyma.09G028400.Wm82.a2.v1	74	63	113	167.353	306	245	239	-1.36711	2.64685e-09	8.75491e-08	down	yes	chrChr09:2331134-2333498:-	gi|356533153|ref|XP_003535132.1|	2086	0	PREDICTED: patellin-4-like [Glycine max]
Glyma.09G028700.Wm82.a2.v1	17	10	15	25.832	44	41	33	-1.05023	0.00191313	0.0137015	down	yes	chrChr09:2354868-2358012:-	gi|734428235|gb|KHN44662.1|	1969	0	hypothetical protein glysoja_036528 [Glycine soja]
Glyma.09G036600.Wm82.a2.v1	3	3	2	9.36187	24	17	10	-1.36774	0.00106225	0.00853657	down	yes	chrChr09:3054357-3054919:+	gi|255626329|gb|ACU13509.1|	400	4e-47	unknown [Glycine max]
Glyma.09G038800.Wm82.a2.v1	100	34	63	41.7597	19	12	14	1.77762	4.48319e-07	9.54495e-06	up	yes	chrChr09:3251349-3254283:+	gi|356529257|ref|XP_003533212.1|	902	4e-118	PREDICTED: uncharacterized protein LOC100817970 [Glycine max]
Glyma.09G040500.Wm82.a2.v1	8	4	6	14.5962	25	38	10	-1.14296	0.00512669	0.0304909	down	yes	chrChr09:3370431-3371819:+	gi|284931970|gb|ADC31789.1|	819	3e-107	pathogenesis-related protein 10 [Glycine max]
Glyma.09G041000.Wm82.a2.v1	59	59	90	119.639	165	187	179	-1.09057	1.22096e-06	2.39208e-05	down	yes	chrChr09:3405065-3408889:-	gi|571476268|ref|XP_006586911.1|	2346	0	PREDICTED: probable polygalacturonase isoform X2 [Glycine max]
Glyma.09G041900.Wm82.a2.v1	446	332	356	246.53	128	93	79	1.95274	1.85917e-20	2.1418e-18	up	yes	chrChr09:3552782-3554009:-	gi|351723933|ref|NP_001237040.1|	510	2e-60	uncharacterized protein LOC100305812 [Glycine max]
Glyma.09G042000.Wm82.a2.v1	1501	1419	1504	1141.28	788	722	810	1.08029	3.79694e-19	3.96663e-17	up	yes	chrChr09:3579198-3587876:+	gi|734390151|gb|KHN26530.1|	4357	0	Acyl-CoA dehydrogenase family member 10 [Glycine soja]
Glyma.09G043300.Wm82.a2.v1	40	24	14	14.6889	1	4	1	2.10381	3.83867e-07	8.34166e-06	up	yes	chrChr09:3706717-3708193:+	gi|356529448|ref|XP_003533304.1|	1073	1e-140	PREDICTED: uncharacterized protein DDB_G0271670-like [Glycine max]
Glyma.09G045700.Wm82.a2.v1	1872	2842	1974	1559.72	698	861	892	1.53705	6.00007e-17	5.21541e-15	up	yes	chrChr09:3918729-3920118:-	gi|351725843|ref|NP_001238642.1|	899	2e-115	cold-regulated protein [Glycine max]
Glyma.09G046100.Wm82.a2.v1	10	6	0	13.6007	22	18	29	-1.11238	0.00751263	0.0412196	down	yes	chrChr09:3944717-3948748:+	gi|526175945|ref|YP_008145763.1|	219	2e-16	cytochrome c heme attachment protein (chloroplast) [Glycine cyrtoloba]
Glyma.09G047200.Wm82.a2.v1	195	198	160	139.573	84	108	78	1.12502	8.82718e-08	2.15641e-06	up	yes	chrChr09:4074372-4075961:-	gi|351724599|ref|NP_001237575.1|	558	3e-66	uncharacterized protein LOC100499895 [Glycine max]
Glyma.09G052100.Wm82.a2.v1	228	274	286	438.41	551	718	647	-1.06545	3.14299e-10	1.22796e-08	down	yes	chrChr09:4536612-4538089:+	gi|359807224|ref|NP_001241619.1|	618	3e-75	uncharacterized protein LOC100799485 [Glycine max]
Glyma.09G052700.Wm82.a2.v1	233	170	135	126.472	73	63	67	1.44077	1.57532e-09	5.40184e-08	up	yes	chrChr09:4617652-4626364:+	gi|356530276|ref|XP_003533708.1|	3627	0	PREDICTED: potassium transporter 10-like isoformX1 [Glycine max]
Glyma.09G054600.Wm82.a2.v1	184	210	156	134.77	88	97	58	1.24029	7.41445e-08	1.84206e-06	up	yes	chrChr09:4837966-4848633:-	gi|593783423|ref|XP_007154752.1|	1588	0	hypothetical protein PHAVU_003G144700g [Phaseolus vulgaris]
Glyma.09G055900.Wm82.a2.v1	511	684	706	390.884	116	129	116	2.44372	8.9497e-42	2.40847e-39	up	yes	chrChr09:5000243-5001974:-	gi|356532654|ref|XP_003534886.1|	2038	0	PREDICTED: G-type lectin S-receptor-like serine/threonine-protein kinase SD2-5-like [Glycine max]
Glyma.09G060700.Wm82.a2.v1	392	411	694	306.957	141	95	43	2.21881	8.79943e-14	5.60613e-12	up	yes	chrChr09:5690182-5690822:+	gi|571519215|ref|XP_003546438.2|	488	1e-59	PREDICTED: uncharacterized protein LOC100817592 [Glycine max]
Glyma.09G062000.Wm82.a2.v1	253	280	267	167.397	52	78	40	2.21114	4.46035e-22	5.72678e-20	up	yes	chrChr09:5886633-5888384:+	gi|351724653|ref|NP_001236809.1|	385	4e-41	uncharacterized protein LOC100527492 [Glycine max]
Glyma.09G062400.Wm82.a2.v1	40	62	46	32.9101	12	12	20	1.5516	2.68235e-06	4.85639e-05	up	yes	chrChr09:5926092-5927843:+	gi|571476566|ref|XP_006587005.1|	1232	2e-167	PREDICTED: homeobox-leucine zipper protein HAT14-like [Glycine max]
Glyma.09G062600.Wm82.a2.v1	72	89	158	75.5336	37	53	34	1.30192	1.59652e-05	0.00023997	up	yes	chrChr09:5956760-5958942:+	gi|356530360|ref|XP_003533750.1|	1330	0	PREDICTED: brassinosteroid-regulated protein BRU1 [Glycine max]
Glyma.09G066500.Wm82.a2.v1	999	837	861	674.096	425	377	473	1.21189	1.03335e-15	7.99101e-14	up	yes	chrChr09:6530984-6535359:+	gi|356532744|ref|XP_003534931.1|	2693	0	PREDICTED: probable protein phosphatase 2C 6-like isoform X1 [Glycine max]
Glyma.09G066700.Wm82.a2.v1	220	159	142	132.908	79	100	84	1.0659	3.01453e-06	5.35972e-05	up	yes	chrChr09:6550112-6554722:-	gi|363807126|ref|NP_001242595.1|	1054	3e-140	uncharacterized protein LOC100791216 [Glycine max]
Glyma.09G069900.Wm82.a2.v1	101	110	94	74.0255	38	57	35	1.25731	8.61266e-07	1.73382e-05	up	yes	chrChr09:7117808-7121554:+	gi|571476696|ref|XP_003533786.2|	2302	0	PREDICTED: serine/threonine-protein kinase At5g01020-like [Glycine max]
Glyma.09G072000.Wm82.a2.v1	236	227	88	110.415	42	29	15	2.29603	4.94515e-12	2.54358e-10	up	yes	chrChr09:7435436-7436678:-	gi|356530453|ref|XP_003533795.1|	881	2e-114	PREDICTED: ethylene-responsive transcription factor ERF017-like [Glycine max]
Glyma.09G073000.Wm82.a2.v1	218	208	147	101.499	2	2	0	5.04884	1.1474e-48	3.60723e-46	up	yes	chrChr09:7650927-7651406:-	gi|356532812|ref|XP_003534964.1|	486	7e-59	PREDICTED: uncharacterized protein LOC100782725 [Glycine max]
Glyma.09G079900.Wm82.a2.v1	2404	2100	2133	1309.27	319	251	331	2.95547	1.63684e-87	1.2236e-84	up	yes	chrChr09:9159710-9164131:+	gi|571475464|ref|XP_006586640.1|	2687	0	PREDICTED: uncharacterized protein LOC100500551 isoform X1 [Glycine max]
Glyma.09G092600.Wm82.a2.v1	14	1	10	24.7341	43	46	41	-1.53497	6.67617e-05	0.000843334	down	yes	chrChr09:12589324-12592038:-	gi|571476989|ref|XP_003535043.2|	1149	5e-155	PREDICTED: uncharacterized protein LOC100779146 [Glycine max]
Glyma.09G092700.Wm82.a2.v1	9619	6290	9020	5823.23	2751	3993	2407	1.51034	5.55433e-13	3.23817e-11	up	yes	chrChr09:12673090-12675924:+	gi|806310|gb|AAA66288.1|	877	4e-108	proline-rich protein [Glycine max]
Glyma.09G102400.Wm82.a2.v1	61	40	39	32.9407	19	15	19	1.29165	6.38897e-05	0.000811013	up	yes	chrChr09:18604265-18606541:-	gi|734380376|gb|KHN22818.1|	824	8e-109	MLP-like protein 34 [Glycine soja]
Glyma.09G103400.Wm82.a2.v1	929	960	1022	1564.19	2122	2279	2327	-1.01626	2.53596e-17	2.28094e-15	down	yes	chrChr09:19118997-19121838:-	gi|356530665|ref|XP_003533901.1|	1081	6e-146	PREDICTED: 40S ribosomal protein S5-like [Glycine max]
Glyma.09G118300.Wm82.a2.v1	103	166	183	108.965	40	88	60	1.24432	1.28799e-05	0.00019795	up	yes	chrChr09:28309242-28310758:-	gi|351720781|ref|NP_001236164.1|	804	7e-106	uncharacterized protein LOC100527699 [Glycine max]
Glyma.09G126900.Wm82.a2.v1	212	165	181	118.557	50	35	45	2.09539	2.53439e-20	2.88998e-18	up	yes	chrChr09:31193994-31198730:-	gi|356529097|ref|XP_003533133.1|	2998	0	PREDICTED: S-type anion channel SLAH3-like [Glycine max]
Glyma.09G130500.Wm82.a2.v1	234	328	107	167.036	124	118	74	1.06259	0.000464138	0.00428558	up	yes	chrChr09:32523591-32524655:-	gi|356530816|ref|XP_003533976.1|	565	1e-70	PREDICTED: putative late blight resistance protein homolog R1B-19-like [Glycine max]
Glyma.09G132200.Wm82.a2.v1	62	15	14	66.1846	102	58	161	-1.1716	0.00210796	0.0148689	down	yes	chrChr09:32905167-32907898:-	gi|358248752|ref|NP_001239934.1|	1361	0	beta-carotene hydroxylase 2, chloroplastic-like [Glycine max]
Glyma.09G134500.Wm82.a2.v1	3968	5076	4078	3114.82	1760	2294	1100	1.40687	1.69335e-10	6.85469e-09	up	yes	chrChr09:33456423-33457912:+	gi|255641481|gb|ACU21016.1|	855	5e-109	unknown [Glycine max]
Glyma.09G136400.Wm82.a2.v1	24	38	33	60.0753	118	77	83	-1.20365	1.60584e-05	0.000240833	down	yes	chrChr09:33835888-33841126:-	gi|356529192|ref|XP_003533180.1|	3428	0	PREDICTED: kinesin-like protein KIF22-A-like isoform X1 [Glycine max]
Glyma.09G138100.Wm82.a2.v1	1972	2645	1890	1619.42	1201	1022	817	1.20934	2.00418e-11	9.59013e-10	up	yes	chrChr09:34351919-34356555:+	gi|356530866|ref|XP_003534000.1|	2546	0	PREDICTED: 4-coumarate--CoA ligase-like 10-like [Glycine max]
Glyma.09G147200.Wm82.a2.v1	84	132	31	56.0941	27	26	28	1.37333	0.000101613	0.00120655	up	yes	chrChr09:36525358-36530767:+	gi|55824656|gb|AAV66464.1|	911	6e-109	drought responsive element binding protein [Glycine soja]
Glyma.09G149800.Wm82.a2.v1	259	344	344	222.116	108	120	127	1.50235	1.73692e-15	1.31595e-13	up	yes	chrChr09:37014388-37016949:-	gi|571480399|ref|XP_006588252.1|	1700	0	PREDICTED: PTI1-like tyrosine-protein kinase At3g15890-like [Glycine max]
Glyma.09G153900.Wm82.a2.v1	10940	13079	12857	8649.29	4335	4788	4695	1.55131	1.81455e-35	3.88787e-33	up	yes	chrChr09:37666799-37671117:+	gi|356530953|ref|XP_003534043.1|	2361	0	PREDICTED: enolase [Glycine max]
Glyma.09G156700.Wm82.a2.v1	18	21	16	34.0348	59	46	51	-1.11997	0.000273817	0.00276604	down	yes	chrChr09:38000427-38003783:+	gi|356530973|ref|XP_003534053.1|	1692	0	PREDICTED: peroxidase 47-like [Glycine max]
Glyma.09G164700.Wm82.a2.v1	423	373	370	265.307	126	126	132	1.70411	3.92908e-25	5.74653e-23	up	yes	chrChr09:38873330-38879453:+	gi|356529422|ref|XP_003533291.1|	3987	0	PREDICTED: plastid division protein CDP1, chloroplastic-like [Glycine max]
Glyma.09G166400.Wm82.a2.v1	1072	1037	608	612.754	320	252	289	1.70853	5.62741e-16	4.45413e-14	up	yes	chrChr09:39034658-39039893:-	gi|356531062|ref|XP_003534097.1|	2533	0	PREDICTED: organic cation/carnitine transporter 1-like [Glycine max]
Glyma.09G172500.Wm82.a2.v1	794	769	919	625.901	467	571	171	1.05216	0.000210847	0.00221993	up	yes	chrChr09:39717919-39719362:+	gi|356531126|ref|XP_003534129.1|	1467	0	PREDICTED: mitogen-activated protein kinase kinase 4 [Glycine max]
Glyma.09G173200.Wm82.a2.v1	3050	3142	3180	2343.92	1468	1428	1547	1.2271	3.65775e-29	6.24584e-27	up	yes	chrChr09:39770769-39775149:+	gi|358248136|ref|NP_001239821.1|	1697	0	cytosolic glutamine synthetase alpha [Glycine max]
Glyma.09G173300.Wm82.a2.v1	293	250	210	157.753	59	65	37	2.19414	8.39305e-21	1.00475e-18	up	yes	chrChr09:39779356-39780476:-	gi|734426036|gb|KHN43647.1|	357	1e-38	hypothetical protein glysoja_027713 [Glycine soja]
Glyma.09G181200.Wm82.a2.v1	50	40	45	90.6991	184	126	119	-1.34947	6.08396e-08	1.54098e-06	down	yes	chrChr09:40614323-40619955:-	gi|356531188|ref|XP_003534160.1|	4979	0	PREDICTED: kinesin-like protein NACK1-like isoform X1 [Glycine max]
Glyma.09G182000.Wm82.a2.v1	519	756	466	413.192	223	264	197	1.42161	5.00978e-12	2.57288e-10	up	yes	chrChr09:40690768-40708346:-	gi|571478198|ref|XP_006587495.1|	3288	0	PREDICTED: probable receptor-like protein kinase At1g67000-like isoform X1 [Glycine max]
Glyma.09G182400.Wm82.a2.v1	73	105	68	61.2806	36	63	16	1.00979	0.00288312	0.019167	up	yes	chrChr09:40745787-40751154:-	gi|356529562|ref|XP_003533359.1|	2641	0	PREDICTED: uncharacterized protein LOC100803213 [Glycine max]
Glyma.09G183400.Wm82.a2.v1	11	12	28	9.44878	0	3	0	1.78138	2.51618e-05	0.000360484	up	yes	chrChr09:40847414-40848996:-	gi|734402488|gb|KHN32052.1|	1682	0	Myb-related protein 305 [Glycine soja]
Glyma.09G183800.Wm82.a2.v1	2086	2504	1724	1256.2	315	299	315	2.8232	1.10147e-67	6.17539e-65	up	yes	chrChr09:40890646-40898085:+	gi|571480495|ref|XP_006588294.1|	3559	0	PREDICTED: synaptotagmin-5-like [Glycine max]
Glyma.09G185500.Wm82.a2.v1	4	2	2	9.06233	13	5	31	-1.15938	0.00610223	0.0350954	down	yes	chrChr09:41059351-41060705:-	gi|351723341|ref|NP_001234972.1|	874	1e-112	dehydrin-like protein [Glycine max]
Glyma.09G190700.Wm82.a2.v1	27	24	28	17.8305	4	12	9	1.30891	0.00054484	0.00490969	up	yes	chrChr09:41541780-41545610:+	gi|356529622|ref|XP_003533388.1|	2316	0	PREDICTED: indole-3-pyruvate monooxygenase YUCCA2-like [Glycine max]
Glyma.09G193000.Wm82.a2.v1	20	18	22	14.1584	6	5	12	1.06398	0.00650953	0.0368954	up	yes	chrChr09:41759292-41763018:+	gi|356531293|ref|XP_003534212.1|	1602	0	PREDICTED: auxin-responsive protein IAA27 [Glycine max]
Glyma.09G195900.Wm82.a2.v1	33	24	32	22.078	15	13	13	1.01324	0.00342014	0.022036	up	yes	chrChr09:42061509-42062471:+	gi|734417349|gb|KHN38849.1|	648	9e-82	hypothetical protein glysoja_014841 [Glycine soja]
Glyma.09G196700.Wm82.a2.v1	84	79	55	54.9716	33	52	21	1.01407	0.00111639	0.00887388	up	yes	chrChr09:42124266-42125452:-	gi|356529655|ref|XP_003533404.1|	617	3e-75	PREDICTED: RING-H2 finger protein ATL80-like [Glycine max]
Glyma.09G203900.Wm82.a2.v1	176	183	151	290.355	479	334	472	-1.09906	5.7374e-09	1.7674e-07	down	yes	chrChr09:42818330-42822983:+	gi|571478535|ref|XP_006587591.1|	1307	2e-177	PREDICTED: mitochondrial carnitine/acylcarnitine carrier-like protein-like [Glycine max]
Glyma.09G205300.Wm82.a2.v1	8670	8632	8402	6206.53	3637	4380	2740	1.36767	7.23831e-16	5.67574e-14	up	yes	chrChr09:42934678-42937102:+	gi|571478550|ref|XP_003534276.2|	1417	0	PREDICTED: uncharacterized protein LOC100791221 [Glycine max]
Glyma.09G210400.Wm82.a2.v1	162	104	100	85.7556	44	58	34	1.40824	2.73116e-07	6.16602e-06	up	yes	chrChr09:43450162-43454516:-	gi|571478628|ref|XP_006587620.1|	4950	0	PREDICTED: disease resistance protein RPM1-like [Glycine max]
Glyma.09G223700.Wm82.a2.v1	9530	9626	8412	5714.85	1868	1951	1698	2.43831	4.77816e-87	3.49419e-84	up	yes	chrChr09:44873159-44877116:-	gi|372266201|ref|NP_001243213.1|	2562	0	putative glycerol-3-phosphate transporter 1-like [Glycine max]
Glyma.09G229200.Wm82.a2.v1	2263	2658	2438	1387.62	204	195	194	3.70457	1.19813e-165	3.35866e-162	up	yes	chrChr09:45317709-45321504:-	gi|383385895|gb|AFH08750.1|	2383	0	purple acid phosphatase 14 [Glycine max]
Glyma.09G235500.Wm82.a2.v1	89	64	66	124.108	210	147	191	-1.06009	2.74491e-06	4.94569e-05	down	yes	chrChr09:45812742-45814061:+	.	.	.	.
Glyma.09G237600.Wm82.a2.v1	9	8	12	19.3556	21	35	35	-1.09373	0.00305152	0.020041	down	yes	chrChr09:45932309-45938217:-	gi|356531768|ref|XP_003534448.1|	3099	0	PREDICTED: nitrate transporter 1.5-like [Glycine max]
Glyma.09G247700.Wm82.a2.v1	105	70	110	168.102	294	260	201	-1.13702	4.59741e-07	9.76341e-06	down	yes	chrChr09:46922109-46923113:+	gi|734378577|gb|KHN22134.1|	991	1e-132	hypothetical protein glysoja_042891 [Glycine soja]
Glyma.09G251500.Wm82.a2.v1	24	24	24	16.4305	7	11	6	1.26564	0.000774101	0.0065625	up	yes	chrChr09:47194586-47201150:-	gi|571479278|ref|XP_006587812.1|	1958	0	PREDICTED: uncharacterized protein LOC100814260 [Glycine max]
Glyma.09G254400.Wm82.a2.v1	91	15	51	34.9056	13	17	16	1.34018	0.000577179	0.00515417	up	yes	chrChr09:47380403-47382283:-	gi|356531945|ref|XP_003534536.1|	863	7e-113	PREDICTED: probable WRKY transcription factor 24-like [Glycine max]
Glyma.09G258000.Wm82.a2.v1	297	400	489	729.378	1293	1200	841	-1.23416	2.85072e-09	9.36479e-08	down	yes	chrChr09:47691284-47695094:-	gi|356531983|ref|XP_003534555.1|	1912	0	PREDICTED: l-3-cyanoalanine synthase 1, mitochondrial-like [Glycine max]
Glyma.09G259700.Wm82.a2.v1	80	84	117	50.8601	4	3	2	3.76901	3.21739e-27	5.05747e-25	up	yes	chrChr09:47833801-47834317:+	gi|571480597|ref|XP_006588339.1|	730	2e-94	PREDICTED: uncharacterized protein LOC102668321 [Glycine max]
Glyma.09G263300.Wm82.a2.v1	727	889	849	546.122	228	231	260	1.88423	8.24736e-36	1.8373e-33	up	yes	chrChr09:48069678-48074607:+	gi|356532042|ref|XP_003534583.1|	2315	0	PREDICTED: digalactosyldiacylglycerol synthase 2, chloroplastic-like isoform X1 [Glycine max]
Glyma.09G272100.Wm82.a2.v1	60	99	189	205.945	337	376	213	-1.05338	0.000504597	0.00459506	down	yes	chrChr09:48860491-48869624:-	gi|571479581|ref|XP_006587900.1|	3856	0	PREDICTED: receptor-like protein 12-like [Glycine max]
Glyma.09G273600.Wm82.a2.v1	1090	1068	1122	857.296	571	561	659	1.01865	8.563e-15	6.06423e-13	up	yes	chrChr09:48976167-48980002:-	gi|356532147|ref|XP_003534635.1|	2506	0	PREDICTED: serine/threonine-protein kinase AtPK2/AtPK19-like [Glycine max]
Glyma.09G273800.Wm82.a2.v1	9	15	8	22.1635	45	30	31	-1.1795	0.00103666	0.00836468	down	yes	chrChr09:48988749-48989868:+	gi|356530167|ref|XP_003533655.1|	882	3e-116	PREDICTED: uncharacterized protein LOC100811911 [Glycine max]
Glyma.09G274000.Wm82.a2.v1	313	233	180	424.8	704	759	437	-1.11237	2.30535e-06	4.23768e-05	down	yes	chrChr09:49008545-49010574:+	gi|356532151|ref|XP_003534637.1|	1427	0	PREDICTED: probable WRKY transcription factor 70-like [Glycine max]
Glyma.09G281900.Wm82.a2.v1	829	610	728	556.149	340	506	269	1.04653	1.99343e-06	3.72746e-05	up	yes	chrChr09:49746278-49748776:-	gi|363814304|ref|NP_001242792.1|	1901	0	uncharacterized protein LOC100779492 [Glycine max]
Glyma.10G001800.Wm82.a2.v1	63	19	24	22.1405	6	5	11	1.59681	6.13455e-05	0.000783851	up	yes	chrChr10:198285-200540:+	gi|356535919|ref|XP_003536489.1|	2784	0	PREDICTED: 3-ketoacyl-CoA synthase 11-like [Glycine max]
Glyma.10G002200.Wm82.a2.v1	173	164	177	118.718	39	103	38	1.4301	1.96346e-06	3.6796e-05	up	yes	chrChr10:243597-246211:+	gi|351727589|ref|NP_001236910.1|	756	2e-97	uncharacterized protein LOC100526987 [Glycine max]
Glyma.10G003200.Wm82.a2.v1	258	184	188	160.794	114	98	107	1.08131	1.59265e-07	3.73346e-06	up	yes	chrChr10:320571-324234:-	gi|356537208|ref|XP_003537121.1|	1684	0	PREDICTED: chlorophyllase-2, chloroplastic-like [Glycine max]
Glyma.10G006200.Wm82.a2.v1	542	584	534	890.537	1176	1304	1347	-1.00866	1.56904e-14	1.08602e-12	down	yes	chrChr10:613862-616294:-	gi|359807602|ref|NP_001241416.1|	1115	3e-149	uncharacterized protein LOC100797399 [Glycine max]
Glyma.10G006600.Wm82.a2.v1	6	15	23	9.30841	0	5	5	1.10559	0.00892348	0.0473757	up	yes	chrChr10:642781-645113:-	gi|356534297|ref|XP_003535693.1|	1281	8e-174	PREDICTED: myb-related protein Myb4 [Glycine max]
Glyma.10G006700.Wm82.a2.v1	382	742	768	346.927	19	34	38	3.98525	3.70556e-48	1.12299e-45	up	yes	chrChr10:662561-665361:-	gi|265144339|gb|ACY74614.1|	2511	0	phosphate transporter1-3 [Glycine max]
Glyma.10G010300.Wm82.a2.v1	82	74	104	63.9333	36	60	20	1.11233	0.000399296	0.00377619	up	yes	chrChr10:976000-977159:+	gi|356536669|ref|XP_003536859.1|	1164	1e-158	PREDICTED: transcription factor MYB108 [Glycine max]
Glyma.10G011800.Wm82.a2.v1	30	49	21	78.8421	122	108	162	-1.5562	6.60429e-08	1.65053e-06	down	yes	chrChr10:1101957-1103686:-	gi|734362555|gb|KHN16203.1|	2505	0	Pentatricopeptide repeat-containing protein, mitochondrial [Glycine soja]
Glyma.10G012900.Wm82.a2.v1	991	803	422	547.511	286	375	344	1.18647	1.77184e-06	3.34659e-05	up	yes	chrChr10:1168915-1170362:+	gi|356534791|ref|XP_003535935.1|	585	2e-70	PREDICTED: calvin cycle protein CP12-2, chloroplastic [Glycine max]
Glyma.10G016700.Wm82.a2.v1	45	35	210	64.3039	36	23	26	1.33462	0.0006361	0.00558689	up	yes	chrChr10:1485141-1486020:+	gi|356535010|ref|XP_003536042.1|	897	6e-120	PREDICTED: proline-rich protein 3-like [Glycine max]
Glyma.10G018800.Wm82.a2.v1	150	194	254	124.666	23	65	36	2.08122	2.33356e-12	1.26815e-10	up	yes	chrChr10:1627550-1631309:+	gi|356535248|ref|XP_003536160.1|	1687	0	PREDICTED: E3 ubiquitin-protein ligase BAH1-like isoform X1 [Glycine max]
Glyma.10G020900.Wm82.a2.v1	236	207	225	161.885	77	98	108	1.32697	2.40797e-11	1.13927e-09	up	yes	chrChr10:1808789-1810391:-	gi|255640691|gb|ACU20630.1|	432	9e-48	unknown [Glycine max]
Glyma.10G025300.Wm82.a2.v1	51	123	66	58.1366	31	43	28	1.16018	0.000276077	0.00278637	up	yes	chrChr10:2189157-2190507:-	gi|356536758|ref|XP_003536902.1|	1713	0	PREDICTED: adenylate isopentenyltransferase 3, chloroplastic-like [Glycine max]
Glyma.10G025400.Wm82.a2.v1	1601	1781	1769	1150.68	504	531	527	1.85131	6.61526e-51	2.34243e-48	up	yes	chrChr10:2204704-2208295:+	gi|571481335|ref|XP_006588625.1|	1220	9e-166	PREDICTED: uncharacterized protein LOC100785058 [Glycine max]
Glyma.10G028100.Wm82.a2.v1	317	58	131	117.765	62	64	56	1.27189	0.00033597	0.00326544	up	yes	chrChr10:2443152-2444739:-	gi|734320268|gb|KHN03811.1|	768	9e-100	Non-specific lipid-transfer protein-like protein [Glycine soja]
Glyma.10G028200.Wm82.a2.v1	66	24	20	25.6636	9	11	20	1.11998	0.00416095	0.0257393	up	yes	chrChr10:2446441-2451423:+	gi|356536777|ref|XP_003536911.1|	838	1e-109	PREDICTED: uncharacterized protein LOC100809817 [Glycine max]
Glyma.10G028300.Wm82.a2.v1	47	30	24	23.7413	11	15	12	1.20804	0.000723832	0.00620565	up	yes	chrChr10:2452488-2455732:+	gi|356536206|ref|XP_003536630.1|	1971	0	PREDICTED: sucrose-binding protein-like [Glycine max]
Glyma.10G031900.Wm82.a2.v1	31	31	44	21.9346	8	5	8	1.85772	3.54553e-07	7.76991e-06	up	yes	chrChr10:2784976-2788133:+	gi|359807079|ref|NP_001241599.1|	998	1e-131	uncharacterized protein LOC100803065 [Glycine max]
Glyma.10G036800.Wm82.a2.v1	4884	5464	4225	2707.38	291	294	328	4.03991	9.30137e-170	2.84444e-166	up	yes	chrChr10:3233051-3236286:-	gi|356536985|ref|XP_003537012.1|	2596	0	PREDICTED: inorganic phosphate transporter 1-4 [Glycine max]
Glyma.10G039700.Wm82.a2.v1	558	493	493	368.747	255	180	186	1.42099	4.50412e-16	3.60748e-14	up	yes	chrChr10:3509365-3515838:-	gi|356537154|ref|XP_003537095.1|	2351	0	PREDICTED: protein PHR1-LIKE 1-like isoform X1 [Glycine max]
Glyma.10G043700.Wm82.a2.v1	24	36	18	18.4026	10	6	14	1.10425	0.00374417	0.0236704	up	yes	chrChr10:3930585-3936499:+	gi|359807328|ref|NP_001241121.1|	1660	0	uncharacterized protein LOC100795299 [Glycine max]
Glyma.10G044700.Wm82.a2.v1	1248	1132	1592	856.875	414	312	284	2.04084	2.27652e-28	3.75391e-26	up	yes	chrChr10:3984850-3988829:-	gi|571480687|ref|XP_006588379.1|	1158	4e-156	PREDICTED: uncharacterized protein LOC100306101 isoform X1 [Glycine max]
Glyma.10G045400.Wm82.a2.v1	77	91	57	54.1533	27	44	22	1.22628	4.82737e-05	0.000636566	up	yes	chrChr10:4040116-4040940:-	gi|356537375|ref|XP_003537203.1|	813	8e-107	PREDICTED: zinc finger protein ZAT11-like [Glycine max]
Glyma.10G045500.Wm82.a2.v1	71	34	81	109.51	208	123	161	-1.06647	0.000185226	0.00198941	down	yes	chrChr10:4042401-4052283:-	gi|356536883|ref|XP_003536962.1|	5264	0	PREDICTED: probable 125 kDa kinesin-related protein-like [Glycine max]
Glyma.10G046200.Wm82.a2.v1	42	18	18	15.0132	1	7	0	1.77941	2.25758e-05	0.000326214	up	yes	chrChr10:4135961-4137371:-	gi|356536893|ref|XP_003536967.1|	1437	0	PREDICTED: probable membrane-associated kinase regulator 4-like [Glycine max]
Glyma.10G046400.Wm82.a2.v1	2139	2317	2486	1555.85	726	579	834	1.8039	1.16243e-30	2.13677e-28	up	yes	chrChr10:4155215-4164211:-	gi|356537411|ref|XP_003537221.1|	4453	0	PREDICTED: phosphatidate phosphatase LPIN3-like [Glycine max]
Glyma.10G046500.Wm82.a2.v1	269	349	467	227.808	67	79	90	2.18231	1.08775e-21	1.36533e-19	up	yes	chrChr10:4167531-4169125:+	gi|356536897|ref|XP_003536969.1|	1959	0	PREDICTED: protein GPR107-like [Glycine max]
Glyma.10G048500.Wm82.a2.v1	42	65	31	33.6184	29	14	17	1.0827	0.00169864	0.012457	up	yes	chrChr10:4363155-4368939:+	gi|571480959|ref|XP_006588513.1|	1375	0	PREDICTED: MYB transcription factor MYB118 isoform X1 [Glycine max]
Glyma.10G049400.Wm82.a2.v1	344	386	395	616.032	865	956	853	-1.04827	4.43057e-14	2.9281e-12	down	yes	chrChr10:4447930-4449636:-	gi|593687743|ref|XP_007144531.1|	746	4e-96	hypothetical protein PHAVU_007G163700g [Phaseolus vulgaris]
Glyma.10G053100.Wm82.a2.v1	312	343	293	567.298	786	892	883	-1.22521	1.8647e-17	1.69532e-15	down	yes	chrChr10:4788605-4789903:-	gi|356537557|ref|XP_003537293.1|	840	9e-109	PREDICTED: 60S ribosomal protein L12-like [Glycine max]
Glyma.10G053200.Wm82.a2.v1	107	61	107	69.1077	40	60	32	1.05455	0.000354273	0.00341374	up	yes	chrChr10:4797298-4798575:+	gi|356537559|ref|XP_003537294.1|	862	8e-112	PREDICTED: ubiquitin carboxyl-terminal hydrolase 34-like [Glycine max]
Glyma.10G056200.Wm82.a2.v1	77	196	189	268.79	322	410	467	-1.0673	8.10963e-05	0.00099236	down	yes	chrChr10:5139913-5140707:+	gi|356533200|ref|XP_003535155.1|	544	3e-67	PREDICTED: auxin-induced protein 6B-like [Glycine max]
Glyma.10G064800.Wm82.a2.v1	326	367	368	273.363	163	193	198	1.06361	1.38815e-10	5.70157e-09	up	yes	chrChr10:6178462-6183190:-	gi|571481951|ref|XP_006588812.1|	1618	0	PREDICTED: F-box protein PP2-A15-like isoform X2 [Glycine max]
Glyma.10G065400.Wm82.a2.v1	67	95	127	56.3476	3	25	7	2.30832	6.94512e-10	2.54495e-08	up	yes	chrChr10:6242662-6245760:-	gi|571481961|ref|XP_006588814.1|	2994	0	PREDICTED: uncharacterized protein LOC100804666 isoform X1 [Glycine max]
Glyma.10G066200.Wm82.a2.v1	108	133	109	206.301	295	279	352	-1.16924	3.49418e-10	1.3526e-08	down	yes	chrChr10:6403969-6406785:-	gi|356533497|ref|XP_003535300.1|	1359	0	PREDICTED: ribosome production factor 2 homolog [Glycine max]
Glyma.10G070600.Wm82.a2.v1	34	16	51	22.3391	6	13	10	1.36606	0.000418315	0.00392188	up	yes	chrChr10:7093624-7094203:-	gi|571482043|ref|XP_006588839.1|	595	5e-76	PREDICTED: uncharacterized protein LOC102670325 [Glycine max]
Glyma.10G071000.Wm82.a2.v1	418	451	395	228.887	8	16	17	4.61161	1.44465e-80	9.91764e-78	up	yes	chrChr10:7144985-7148990:-	gi|571482047|ref|XP_006588840.1|	2100	0	PREDICTED: purple acid phosphatase 22-like [Glycine max]
Glyma.10G074600.Wm82.a2.v1	257	278	288	190.808	94	103	97	1.58036	3.3947e-19	3.57976e-17	up	yes	chrChr10:7700600-7705819:-	gi|734424835|gb|KHN42803.1|	2106	0	hypothetical protein glysoja_036977, partial [Glycine soja]
Glyma.10G076400.Wm82.a2.v1	310	273	290	500.769	632	747	840	-1.12984	3.64663e-12	1.9318e-10	down	yes	chrChr10:7957604-7959326:+	gi|356534524|ref|XP_003535803.1|	626	2e-75	PREDICTED: 40S ribosomal protein S17-like [Glycine max]
Glyma.10G079700.Wm82.a2.v1	106	119	73	62.8056	12	40	14	1.86114	3.96917e-08	1.05299e-06	up	yes	chrChr10:9218478-9219468:-	gi|356534532|ref|XP_003535807.1|	1075	8e-146	PREDICTED: protein YLS9-like [Glycine max]
Glyma.10G086600.Wm82.a2.v1	4336	4271	3901	2480.73	629	525	632	2.90878	8.08608e-112	9.37957e-109	up	yes	chrChr10:11135206-11139218:-	gi|356534582|ref|XP_003535832.1|	2224	0	PREDICTED: sucrose-phosphatase 1-like isoform X1 [Glycine max]
Glyma.10G090500.Wm82.a2.v1	4368	4970	4676	3257.3	1599	1504	1959	1.59387	6.53609e-30	1.16951e-27	up	yes	chrChr10:12081064-12086755:+	gi|351725990|ref|NP_001238391.1|	1943	0	S-adenosyl-L-methionine:delta24-sterol-C-methyltransferase [Glycine max]
Glyma.10G092800.Wm82.a2.v1	45	15	18	16.5604	10	4	4	1.42104	0.000485271	0.00444433	up	yes	chrChr10:12983545-12986150:-	gi|356534616|ref|XP_003535849.1|	1662	0	PREDICTED: probable 2-oxoglutarate-dependent dioxygenase AOP1.2-like [Glycine max]
Glyma.10G104700.Wm82.a2.v1	256	139	139	338.788	461	347	758	-1.2113	1.12625e-05	0.000176377	down	yes	chrChr10:22965600-22967374:+	gi|356534718|ref|XP_003535899.1|	2333	0	PREDICTED: soyasaponin III rhamnosyltransferase-like [Glycine max]
Glyma.10G111100.Wm82.a2.v1	35	34	36	62.1659	119	81	80	-1.10255	3.35329e-05	0.000464586	down	yes	chrChr10:26040783-26043704:+	gi|356537442|ref|XP_003537236.1|	1591	0	PREDICTED: uncharacterized protein LOC100816759 [Glycine max]
Glyma.10G114600.Wm82.a2.v1	8	13	20	33.8295	50	84	36	-1.42723	7.22452e-05	0.000900762	down	yes	chrChr10:28616198-28619833:+	gi|356537401|ref|XP_003537216.1|	2565	0	PREDICTED: cytochrome P450 71D8-like [Glycine max]
Glyma.10G118900.Wm82.a2.v1	2015	1758	1357	1331.59	1135	917	692	1.01341	3.29745e-07	7.27362e-06	up	yes	chrChr10:30333348-30335201:+	gi|356534799|ref|XP_003535939.1|	741	7e-90	PREDICTED: ethylene-responsive transcription factor ERF104 [Glycine max]
Glyma.10G122300.Wm82.a2.v1	25	37	44	20.2128	1	2	7	2.28662	7.56504e-09	2.28233e-07	up	yes	chrChr10:31342355-31344766:+	gi|734351179|gb|KHN12614.1|	1371	0	Putative expansin-B2 [Glycine soja]
Glyma.10G126100.Wm82.a2.v1	38	36	23	20.3686	3	7	11	1.67013	1.22119e-05	0.000189481	up	yes	chrChr10:33327285-33328328:+	.	.	.	.
Glyma.10G127500.Wm82.a2.v1	20	30	29	52.992	123	54	74	-1.23929	8.90698e-05	0.00107623	down	yes	chrChr10:33874903-33875921:-	gi|255639794|gb|ACU20190.1|	1025	1e-136	unknown [Glycine max]
Glyma.10G138200.Wm82.a2.v1	21	10	26	36.4062	75	53	41	-1.10683	0.00114504	0.00904816	down	yes	chrChr10:37186231-37189255:-	gi|356533491|ref|XP_003535297.1|	2326	0	PREDICTED: protein S-acyltransferase 18-like [Glycine max]
Glyma.10G142100.Wm82.a2.v1	8	18	10	25.5189	50	33	40	-1.23485	0.000462568	0.00427716	down	yes	chrChr10:37558420-37563692:+	gi|356534935|ref|XP_003536006.1|	2267	0	PREDICTED: uncharacterized protein LOC100810716 [Glycine max]
Glyma.10G145300.Wm82.a2.v1	1085	690	348	430.657	175	76	112	1.87609	1.44779e-06	2.7798e-05	up	yes	chrChr10:38014453-38016396:-	gi|734362354|gb|KHN16038.1|	1777	0	Glycogenin-1 [Glycine soja]
Glyma.10G147300.Wm82.a2.v1	11	6	5	22.0926	62	27	28	-1.54714	6.07982e-05	0.000777343	down	yes	chrChr10:38260082-38263381:-	gi|571483066|ref|XP_003536047.2|	1440	0	PREDICTED: uncharacterized protein LOC100787534 [Glycine max]
Glyma.10G147900.Wm82.a2.v1	26	5	12	9.30693	4	3	4	1.11119	0.0084047	0.0451855	up	yes	chrChr10:38328253-38329476:+	gi|356533544|ref|XP_003535323.1|	831	3e-110	PREDICTED: uncharacterized protein LOC100804467 [Glycine max]
Glyma.10G148700.Wm82.a2.v1	68	168	52	57.9413	20	19	8	2.07693	1.17954e-08	3.4473e-07	up	yes	chrChr10:38415381-38418722:+	gi|356533552|ref|XP_003535327.1|	2582	0	PREDICTED: uncharacterized protein LOC100806598 [Glycine max]
Glyma.10G151800.Wm82.a2.v1	980	818	1024	539.265	85	104	82	3.39088	9.90994e-84	7.09278e-81	up	yes	chrChr10:38664102-38666285:+	gi|351720718|ref|NP_001235906.1|	810	3e-105	uncharacterized protein LOC100305730 [Glycine max]
Glyma.10G152200.Wm82.a2.v1	3493	5292	4757	3524.26	1964	2691	2645	1.00718	4.60902e-08	1.20375e-06	up	yes	chrChr10:38696013-38703000:-	gi|356535067|ref|XP_003536070.1|	4362	0	PREDICTED: respiratory burst oxidase homolog protein B-like [Glycine max]
Glyma.10G154100.Wm82.a2.v1	15	16	10	25.6669	37	42	39	-1.08552	0.00121235	0.00946445	down	yes	chrChr10:38926113-38928738:-	gi|571483150|ref|XP_006589144.1|	1963	0	PREDICTED: microtubule-binding protein TANGLED-like [Glycine max]
Glyma.10G157500.Wm82.a2.v1	12	15	8	6.47283	0	1	1	1.65347	9.02748e-05	0.00108883	up	yes	chrChr10:39163551-39175577:+	gi|571483184|ref|XP_003535352.2|	2083	0	PREDICTED: receptor-like cytosolic serine/threonine-protein kinase RBK2-like [Glycine max]
Glyma.10G157700.Wm82.a2.v1	1230	1495	1301	969.288	583	510	577	1.40221	1.54591e-24	2.185e-22	up	yes	chrChr10:39177037-39184196:+	gi|571483187|ref|XP_006589152.1|	4182	0	PREDICTED: autophagy-related protein 18h-like isoform X2 [Glycine max]
Glyma.10G157900.Wm82.a2.v1	49	67	36	129.082	200	162	293	-1.71394	1.7436e-10	7.03272e-09	down	yes	chrChr10:39200172-39202438:+	gi|571483190|ref|XP_006589153.1|	2559	0	PREDICTED: myosin-6-like [Glycine max]
Glyma.10G159000.Wm82.a2.v1	15	16	23	11.2225	4	4	3	1.51655	0.000193264	0.00206126	up	yes	chrChr10:39295428-39305050:-	gi|502117294|ref|XP_004495771.1|	2572	0	PREDICTED: WD repeat-containing protein 48-like [Cicer arietinum]
Glyma.10G160300.Wm82.a2.v1	434	387	381	687.433	996	1039	1009	-1.13941	8.27791e-18	7.67109e-16	down	yes	chrChr10:39440769-39442935:-	gi|351726138|ref|NP_001238140.1|	632	4e-80	uncharacterized protein LOC100499673 [Glycine max]
Glyma.10G161400.Wm82.a2.v1	37	32	31	59.6573	89	96	84	-1.12837	9.47957e-06	0.000151129	down	yes	chrChr10:39557553-39563940:+	gi|356533635|ref|XP_003535367.1|	3208	0	PREDICTED: serine/threonine-protein kinase Nek1-like [Glycine max]
Glyma.10G162000.Wm82.a2.v1	1894	1871	1875	1362.86	795	791	782	1.39834	6.78173e-36	1.52087e-33	up	yes	chrChr10:39625525-39629036:-	gi|571480799|ref|XP_006588433.1|	2040	0	PREDICTED: uncharacterized protein LOC100780764 isoform X1 [Glycine max]
Glyma.10G165200.Wm82.a2.v1	2425	2776	2790	2025.85	1277	1313	1374	1.1576	1.33579e-21	1.67044e-19	up	yes	chrChr10:39949351-39952817:-	gi|356535196|ref|XP_003536134.1|	2920	0	PREDICTED: uncharacterized protein LOC100788778 [Glycine max]
Glyma.10G166900.Wm82.a2.v1	809	888	826	584.653	274	350	275	1.60157	3.70827e-25	5.44727e-23	up	yes	chrChr10:40132512-40134580:+	gi|356535214|ref|XP_003536143.1|	1971	0	PREDICTED: rubisco accumulation factor 1, chloroplastic-like [Glycine max]
Glyma.10G169300.Wm82.a2.v1	300	734	456	356.714	185	288	133	1.27017	9.58588e-06	0.000152607	up	yes	chrChr10:40354773-40356358:+	gi|356535236|ref|XP_003536154.1|	1272	8e-174	PREDICTED: F-box protein PP2-B10-like [Glycine max]
Glyma.10G172600.Wm82.a2.v1	86	18	39	33.2165	13	16	22	1.16699	0.00243933	0.0167224	up	yes	chrChr10:40628401-40633140:-	gi|571483425|ref|XP_003535395.2|	2493	0	PREDICTED: uncharacterized protein LOC100811400 isoform X1 [Glycine max]
Glyma.10G173400.Wm82.a2.v1	2	1	0	11.7877	20	21	31	-2.18097	1.66401e-07	3.8872e-06	down	yes	chrChr10:40720918-40723699:-	gi|734358261|gb|KHN14754.1|	2455	0	Aluminum-activated malate transporter 10 [Glycine soja]
Glyma.10G174900.Wm82.a2.v1	120	90	87	55.4315	8	7	5	3.28261	1.19937e-24	1.70957e-22	up	yes	chrChr10:40829714-40834616:-	gi|571483464|ref|XP_006589246.1|	1629	0	PREDICTED: uncharacterized protein LOC100816738 isoform X1 [Glycine max]
Glyma.10G177300.Wm82.a2.v1	29	21	34	50.4393	73	81	74	-1.11206	6.13538e-05	0.000783851	down	yes	chrChr10:41071828-41075083:+	gi|356535310|ref|XP_003536190.1|	3485	0	PREDICTED: somatic embryogenesis receptor kinase 5-like [Glycine max]
Glyma.10G179400.Wm82.a2.v1	222	114	135	114.931	49	60	95	1.19497	3.16323e-05	0.00044116	up	yes	chrChr10:41254802-41257804:-	gi|356535335|ref|XP_003536202.1|	2786	0	PREDICTED: 3-ketoacyl-CoA synthase 19-like [Glycine max]
Glyma.10G179700.Wm82.a2.v1	542	502	511	401.122	275	275	265	1.07252	2.17891e-14	1.48674e-12	up	yes	chrChr10:41299077-41313005:+	gi|571483526|ref|XP_006589261.1|	4533	0	PREDICTED: putative ion channel POLLUX-like 2-like isoform X2 [Glycine max]
Glyma.10G184500.Wm82.a2.v1	316	340	285	237.847	151	170	141	1.14551	2.74853e-11	1.28951e-09	up	yes	chrChr10:41764060-41765280:-	gi|571486093|ref|XP_006590179.1|	863	2e-113	PREDICTED: transcriptional regulator TAC1-like [Glycine max]
Glyma.10G185200.Wm82.a2.v1	96	99	123	80.1362	77	54	24	1.02269	0.000832504	0.00698021	up	yes	chrChr10:41826042-41831114:+	gi|356535402|ref|XP_003536234.1|	2707	0	PREDICTED: uncharacterized protein LOC100799160 [Glycine max]
Glyma.10G186000.Wm82.a2.v1	774	694	480	457.073	205	296	228	1.48297	1.71399e-12	9.43649e-11	up	yes	chrChr10:41910760-41912094:+	gi|351723241|ref|NP_001237016.1|	1446	0	phosphoenolpyruvate-carboxylase kinase [Glycine max]
Glyma.10G186400.Wm82.a2.v1	153	101	121	67.769	6	1	4	4.0053	1.30335e-32	2.56395e-30	up	yes	chrChr10:41935063-41939261:-	gi|358248970|ref|NP_001239971.1|	2388	0	inorganic phosphate transporter 1-4-like [Glycine max]
Glyma.10G186500.Wm82.a2.v1	10057	13363	12257	7502.49	2357	2898	2582	2.28023	1.52949e-52	5.84666e-50	up	yes	chrChr10:41946209-41950274:-	gi|358249322|ref|NP_001240032.1|	2752	0	probable inorganic phosphate transporter 1-7-like [Glycine max]
Glyma.10G189700.Wm82.a2.v1	36	26	41	59.6636	110	92	64	-1.03809	0.000271852	0.00275198	down	yes	chrChr10:42279711-42281610:+	gi|734398928|gb|KHN30723.1|	1355	0	hypothetical protein glysoja_034066 [Glycine soja]
Glyma.10G193600.Wm82.a2.v1	105	28	43	39.8047	17	13	26	1.32877	0.000392528	0.0037195	up	yes	chrChr10:42570070-42571181:-	gi|351726263|ref|NP_001235329.1|	917	1e-122	uncharacterized protein LOC100500505 precursor [Glycine max]
Glyma.10G194200.Wm82.a2.v1	37	34	36	24.9348	15	19	5	1.22597	0.00072269	0.00620009	up	yes	chrChr10:42630111-42632551:-	gi|734415825|gb|KHN37912.1|	1019	4e-130	Ethylene-responsive transcription factor ERF106 [Glycine soja]
Glyma.10G195200.Wm82.a2.v1	0	10	8	16.7444	30	22	35	-1.28546	0.00168837	0.0123925	down	yes	chrChr10:42708491-42710238:+	gi|571483762|ref|XP_006589342.1|	1602	0	PREDICTED: uncharacterized protein At5g39865-like [Glycine max]
Glyma.10G196200.Wm82.a2.v1	26	20	26	17.3652	9	6	15	1.0348	0.00614215	0.0352629	up	yes	chrChr10:42765160-42768645:+	gi|734415808|gb|KHN37895.1|	962	7e-129	hypothetical protein glysoja_017019 [Glycine soja]
Glyma.10G197800.Wm82.a2.v1	1002	1087	969	554.929	32	35	40	4.74771	2.56014e-146	4.78448e-143	up	yes	chrChr10:42914376-42918603:+	gi|356535511|ref|XP_003536288.1|	2939	0	PREDICTED: 4-coumarate--CoA ligase-like 5-like [Glycine max]
Glyma.10G198200.Wm82.a2.v1	13	9	7	18.2246	33	28	23	-1.00547	0.00650949	0.0368954	down	yes	chrChr10:42939885-42940724:+	gi|571483798|ref|XP_006589353.1|	131	7e-07	PREDICTED: putative glycine-rich cell wall structural protein 1-like [Glycine max]
Glyma.10G200700.Wm82.a2.v1	5876	6901	3528	3842.13	1688	2216	2314	1.44827	3.24438e-11	1.49299e-09	up	yes	chrChr10:43142100-43147237:-	gi|356535533|ref|XP_003536299.1|	3810	0	PREDICTED: uncharacterized protein LOC100789310 [Glycine max]
Glyma.10G200800.Wm82.a2.v1	67	53	30	35.4401	33	11	14	1.16659	0.00131423	0.0101165	up	yes	chrChr10:43176609-43181023:+	gi|574584589|ref|NP_001276177.1|	2525	0	7-ethoxycoumarin O-deethylase-like precursor [Glycine max]
Glyma.10G202000.Wm82.a2.v1	2242	2485	2489	1735.86	943	1055	982	1.41555	7.92515e-31	1.4648e-28	up	yes	chrChr10:43315970-43318767:+	gi|356535547|ref|XP_003536306.1|	1408	0	PREDICTED: uncharacterized protein LOC100793001 [Glycine max]
Glyma.10G204200.Wm82.a2.v1	1195	1174	1030	689.685	187	249	148	2.56902	2.40453e-42	6.62999e-40	up	yes	chrChr10:43534042-43537388:-	gi|356535561|ref|XP_003536313.1|	1768	0	PREDICTED: probable transcription factor GLK2-like [Glycine max]
Glyma.10G205500.Wm82.a2.v1	1461	1348	1089	763.662	203	143	150	2.99756	2.36938e-62	1.15513e-59	up	yes	chrChr10:43701930-43711002:+	gi|734415727|gb|KHN37814.1|	5225	0	Phosphoenolpyruvate carboxylase 4 [Glycine soja]
Glyma.10G209900.Wm82.a2.v1	14	20	21	10.1464	0	1	2	2.08771	6.39609e-07	1.32161e-05	up	yes	chrChr10:44187230-44191333:-	gi|571483998|ref|XP_006589421.1|	1989	0	PREDICTED: vinorine synthase-like [Glycine max]
Glyma.10G211000.Wm82.a2.v1	292	231	342	657.443	1438	907	894	-1.61466	1.74745e-14	1.20703e-12	down	yes	chrChr10:44343751-44346957:+	gi|356535641|ref|XP_003536353.1|	1506	0	PREDICTED: aquaporin PIP2-1-like isoform 1 [Glycine max]
Glyma.10G214200.Wm82.a2.v1	1572	1416	1727	1085.58	538	641	455	1.63417	1.21158e-23	1.67034e-21	up	yes	chrChr10:44640345-44645298:+	gi|356535682|ref|XP_003536373.1|	660	1e-84	PREDICTED: glutamyl-tRNA(Gln) amidotransferase subunit C, chloroplastic/mitochondrial-like isoform X1 [Glycine max]
Glyma.10G214500.Wm82.a2.v1	41196	38649	45815	30593	22562	17332	14390	1.32771	2.58374e-15	1.92288e-13	up	yes	chrChr10:44656910-44657834:+	gi|734364119|gb|KHN17102.1|	318	1e-33	hypothetical protein glysoja_011576 [Glycine soja]
Glyma.10G216600.Wm82.a2.v1	734	726	680	538.4	316	372	346	1.18507	5.42116e-17	4.76142e-15	up	yes	chrChr10:44831564-44835080:+	gi|359807093|ref|NP_001241089.1|	1346	0	uncharacterized protein LOC100789661 [Glycine max]
Glyma.10G222600.Wm82.a2.v1	235	210	140	149.903	101	114	85	1.04181	7.12546e-06	0.000116582	up	yes	chrChr10:45378675-45380536:-	gi|356535758|ref|XP_003536410.1|	1688	0	PREDICTED: phytosulfokine receptor 2-like [Glycine max]
Glyma.10G223400.Wm82.a2.v1	1391	1277	1123	2164.44	3120	3020	3439	-1.13533	2.57599e-17	2.31077e-15	down	yes	chrChr10:45440350-45443915:-	gi|356535772|ref|XP_003536417.1|	1976	0	PREDICTED: 60S ribosomal protein L3-like [Glycine max]
Glyma.10G227400.Wm82.a2.v1	1526	1636	1290	1044.68	612	378	683	1.48933	1.48e-13	9.23666e-12	up	yes	chrChr10:45788249-45796345:+	gi|356535814|ref|XP_003536438.1|	7660	0	PREDICTED: ABC transporter C family member 10-like isoform X1 [Glycine max]
Glyma.10G229300.Wm82.a2.v1	446	415	345	807.541	1095	1254	1457	-1.42739	8.24976e-18	7.66613e-16	down	yes	chrChr10:45923278-45927038:-	gi|571484291|ref|XP_006589515.1|	2910	0	PREDICTED: S-type anion channel SLAH3-like [Glycine max]
Glyma.10G230700.Wm82.a2.v1	122	104	56	69.3572	38	39	49	1.1472	8.96722e-05	0.00108234	up	yes	chrChr10:46060022-46065739:+	gi|571484310|ref|XP_006589522.1|	1556	0	PREDICTED: transcription factor ASG4-like isoform X1 [Glycine max]
Glyma.10G231200.Wm82.a2.v1	112	86	179	237.242	486	255	355	-1.21228	5.06489e-06	8.55311e-05	down	yes	chrChr10:46093079-46095496:+	gi|351727623|ref|NP_001237423.1|	1556	0	beta-carotene hydroxylase [Glycine max]
Glyma.10G235300.Wm82.a2.v1	50	48	30	88.0798	149	81	190	-1.31327	1.12577e-05	0.000176377	down	yes	chrChr10:46468498-46473391:+	gi|571484373|ref|XP_006589540.1|	4230	0	PREDICTED: titin-like isoform X1 [Glycine max]
Glyma.10G237600.Wm82.a2.v1	117	119	119	74.0978	12	38	24	2.074	2.68863e-12	1.44348e-10	up	yes	chrChr10:46607534-46609838:+	gi|571484414|ref|XP_006589555.1|	688	1e-89	PREDICTED: uncharacterized protein LOC100792832 isoform X2 [Glycine max]
Glyma.10G239400.Wm82.a2.v1	16	15	11	8.0173	2	1	1	1.71481	4.70655e-05	0.000622097	up	yes	chrChr10:46808226-46810838:+	gi|356535906|ref|XP_003536483.1|	851	9e-105	PREDICTED: dehydration-responsive element-binding protein 1A [Glycine max]
Glyma.10G242600.Wm82.a2.v1	19232	18511	20225	15178.2	10800	11614	9407	1.01308	9.95133e-16	7.7132e-14	up	yes	chrChr10:47097757-47102097:-	gi|734317856|gb|KHN02762.1|	2477	0	ATP sulfurylase 1, chloroplastic [Glycine soja]
Glyma.10G244200.Wm82.a2.v1	319	382	422	276.185	172	149	182	1.26957	6.30224e-13	3.63015e-11	up	yes	chrChr10:47247622-47250902:-	gi|356535966|ref|XP_003536512.1|	2115	0	PREDICTED: uncharacterized protein LOC100813031 isoformX2 [Glycine max]
Glyma.10G245200.Wm82.a2.v1	867	878	779	1393.03	1907	2005	2157	-1.0694	3.15043e-17	2.79623e-15	down	yes	chrChr10:47373482-47376024:+	gi|734317835|gb|KHN02741.1|	1287	6e-175	40S ribosomal protein S3a [Glycine soja]
Glyma.10G245300.Wm82.a2.v1	286	122	249	155.767	96	71	89	1.35209	7.46298e-07	1.52705e-05	up	yes	chrChr10:47376053-47377225:-	gi|351725891|ref|NP_001237364.1|	961	3e-127	uncharacterized protein LOC100500394 [Glycine max]
Glyma.10G245500.Wm82.a2.v1	455	397	393	306.849	194	174	193	1.27421	8.55956e-16	6.68063e-14	up	yes	chrChr10:47393249-47399064:-	gi|356534189|ref|XP_003535640.1|	3507	0	PREDICTED: protein tesmin/TSO1-like CXC 2-like [Glycine max]
Glyma.10G246800.Wm82.a2.v1	334	102	157	136.346	59	60	84	1.42501	7.53564e-06	0.000122578	up	yes	chrChr10:47511564-47513529:-	gi|356534201|ref|XP_003535646.1|	687	5e-86	PREDICTED: DNA-directed RNA polymerase II subunit rpb1-like [Glycine max]
Glyma.10G255000.Wm82.a2.v1	263	274	323	193.609	78	105	87	1.73731	5.51752e-19	5.69337e-17	up	yes	chrChr10:48201033-48206561:-	gi|351722440|ref|NP_001237500.1|	1537	0	inositol phosphate kinase [Glycine max]
Glyma.10G257200.Wm82.a2.v1	280	269	390	208.593	44	137	95	1.66933	8.16422e-09	2.44774e-07	up	yes	chrChr10:48364536-48365545:-	gi|734330597|gb|KHN06811.1|	349	2e-37	hypothetical protein glysoja_021357 [Glycine soja]
Glyma.10G257900.Wm82.a2.v1	476	486	494	362.677	217	310	153	1.17508	1.0068e-07	2.44004e-06	up	yes	chrChr10:48422948-48424339:+	gi|356536109|ref|XP_003536582.1|	1000	6e-131	PREDICTED: zinc finger protein AZF1-like [Glycine max]
Glyma.10G258000.Wm82.a2.v1	24	32	19	15.2267	5	6	2	1.76031	9.03964e-06	0.00014439	up	yes	chrChr10:48436958-48443566:+	gi|356536111|ref|XP_003536583.1|	3090	0	PREDICTED: BTB/POZ domain-containing protein NPY2-like isoform X1 [Glycine max]
Glyma.10G261900.Wm82.a2.v1	148	186	160	105.944	55	35	32	1.98915	2.82257e-16	2.31018e-14	up	yes	chrChr10:48683541-48685853:-	gi|356536164|ref|XP_003536609.1|	1327	4e-179	PREDICTED: SPX domain-containing protein 2-like [Glycine max]
Glyma.10G265100.Wm82.a2.v1	79	138	50	58.2157	21	33	18	1.64728	9.6603e-07	1.932e-05	up	yes	chrChr10:48907195-48908284:+	gi|358249084|ref|NP_001239990.1|	796	2e-103	uncharacterized protein LOC100789312 [Glycine max]
Glyma.10G266300.Wm82.a2.v1	185	248	105	117.028	41	61	41	1.79733	4.94303e-10	1.85994e-08	up	yes	chrChr10:48978734-48979620:-	gi|356536232|ref|XP_003536643.1|	868	7e-115	PREDICTED: uncharacterized protein LOC100794402 [Glycine max]
Glyma.10G271200.Wm82.a2.v1	309	437	221	238.687	155	145	139	1.20467	1.65265e-07	3.86603e-06	up	yes	chrChr10:49343319-49353861:+	gi|351721259|ref|NP_001238739.1|	4363	0	wall-associated kinase [Glycine max]
Glyma.10G276500.Wm82.a2.v1	1351	1420	1500	939.02	382	426	390	1.95628	3.87685e-51	1.38738e-48	up	yes	chrChr10:49887313-49892815:+	gi|571484959|ref|XP_006589703.1|	1037	1e-129	PREDICTED: TATA-binding protein-associated factor 2N-like isoform X2 [Glycine max]
Glyma.10G277800.Wm82.a2.v1	1344	1184	598	634.429	185	241	111	2.38169	6.01826e-18	5.68675e-16	up	yes	chrChr10:50004232-50006000:+	gi|351725775|ref|NP_001237360.1|	1148	7e-154	syringolide-induced protein 1-3-1A [Glycine max]
Glyma.10G280400.Wm82.a2.v1	852	685	668	506.149	347	196	213	1.60472	2.93645e-14	1.99151e-12	up	yes	chrChr10:50157107-50159056:-	gi|356536375|ref|XP_003536714.1|	2646	0	PREDICTED: soyasapogenol B glucuronide galactosyltransferase-like [Glycine max]
Glyma.10G281600.Wm82.a2.v1	1121	969	1305	758.338	354	455	218	1.74867	1.05408e-14	7.40252e-13	up	yes	chrChr10:50265922-50270455:-	gi|571485023|ref|XP_006589722.1|	2068	0	PREDICTED: uncharacterized protein LOC100788258 isoform X2 [Glycine max]
Glyma.10G281700.Wm82.a2.v1	35	21	25	17.8608	9	6	8	1.43249	0.000140359	0.00158676	up	yes	chrChr10:50268997-50270088:+	.	.	.	.
Glyma.10G286500.Wm82.a2.v1	289	294	274	181.155	70	66	58	2.19494	7.41401e-32	1.43333e-29	up	yes	chrChr10:50616892-50620159:+	gi|356536439|ref|XP_003536745.1|	2094	0	PREDICTED: transmembrane protein 53-like isoform X1 [Glycine max]
Glyma.10G286900.Wm82.a2.v1	178	133	117	378.639	670	616	655	-1.91312	1.60407e-26	2.48661e-24	down	yes	chrChr10:50642894-50645066:-	gi|356536447|ref|XP_003536749.1|	1030	5e-135	PREDICTED: GEM-like protein 4-like [Glycine max]
Glyma.10G287200.Wm82.a2.v1	28	34	33	64.656	112	89	106	-1.36637	7.35825e-08	1.82954e-06	down	yes	chrChr10:50650297-50651850:-	gi|356536453|ref|XP_003536752.1|	1043	5e-139	PREDICTED: GEM-like protein 4-like [Glycine max]
Glyma.10G292200.Wm82.a2.v1	781	631	738	534.09	397	330	269	1.22594	2.44451e-12	1.32417e-10	up	yes	chrChr10:51006927-51009538:+	gi|734414479|gb|KHN37310.1|	1135	2e-153	Chalcone--flavonone isomerase 1B-2 [Glycine soja]
Glyma.10G293500.Wm82.a2.v1	946	936	989	528.009	56	49	40	4.27254	3.86607e-131	5.91139e-128	up	yes	chrChr10:51103542-51107669:+	gi|356536526|ref|XP_003536788.1|	3743	0	PREDICTED: transketolase, chloroplastic-like [Glycine max]
Glyma.10G296400.Wm82.a2.v1	34	59	60	34.2465	18	16	13	1.52005	3.74871e-06	6.51358e-05	up	yes	chrChr10:51323582-51325605:+	gi|356534504|ref|XP_003535793.1|	2752	0	PREDICTED: cytochrome P450 76A2-like [Glycine max]
Glyma.11G002400.Wm82.a2.v1	154	129	106	226.175	330	311	368	-1.13936	1.67477e-09	5.71376e-08	down	yes	chrChr11:119696-120894:-	gi|734409101|gb|KHN35208.1|	635	3e-81	40S ribosomal protein S20-2 [Glycine soja]
Glyma.11G003600.Wm82.a2.v1	149	144	128	242.03	322	343	409	-1.12506	2.5808e-10	1.01896e-08	down	yes	chrChr11:268784-270800:+	gi|734404565|gb|KHN33076.1|	698	6e-89	40S ribosomal protein S15a-1 [Glycine soja]
Glyma.11G012400.Wm82.a2.v1	9	4	7	17.4283	37	39	13	-1.29314	0.00120312	0.00940983	down	yes	chrChr11:873801-876507:+	gi|571486761|ref|XP_006590456.1|	2355	0	PREDICTED: cell division cycle 20.1, cofactor of APC complex-like [Glycine max]
Glyma.11G013200.Wm82.a2.v1	5770	6456	6993	4282.57	1600	2411	1741	1.82525	7.56923e-26	1.14694e-23	up	yes	chrChr11:916689-922046:+	gi|367460045|ref|NP_001238550.2|	620	3e-78	uncharacterized protein LOC100500211 [Glycine max]
Glyma.11G017100.Wm82.a2.v1	317	331	330	220	87	106	113	1.76084	4.47065e-23	5.94419e-21	up	yes	chrChr11:1178977-1183426:-	gi|356539282|ref|XP_003538128.1|	2089	0	PREDICTED: UDP-glucose 4-epimerase GEPI48-like [Glycine max]
Glyma.11G019900.Wm82.a2.v1	367	541	382	334.624	280	232	178	1.00409	1.63977e-06	3.11288e-05	up	yes	chrChr11:1396970-1401272:+	gi|356540416|ref|XP_003538685.1|	4034	0	PREDICTED: cation/H(+) antiporter 18-like isoform X1 [Glycine max]
Glyma.11G021300.Wm82.a2.v1	41	42	51	32.1886	13	14	28	1.17191	0.00044291	0.00411567	up	yes	chrChr11:1512657-1515641:+	gi|356540428|ref|XP_003538691.1|	2020	0	PREDICTED: meiotic recombination protein SPO11-2-like [Glycine max]
Glyma.11G026900.Wm82.a2.v1	25	41	42	77.9008	113	90	174	-1.40745	1.26365e-06	2.46138e-05	down	yes	chrChr11:1930366-1932303:+	gi|356540470|ref|XP_003538712.1|	3055	0	PREDICTED: molybdenum cofactor sulfurase-like [Glycine max]
Glyma.11G030200.Wm82.a2.v1	165	141	80	83.4762	25	43	31	1.826	6.24332e-10	2.31298e-08	up	yes	chrChr11:2188990-2191389:-	gi|356540355|ref|XP_003538655.1|	1231	2e-165	PREDICTED: protein ODORANT1-like [Glycine max]
Glyma.11G032600.Wm82.a2.v1	346	317	215	187.716	72	74	66	2.05719	1.23163e-20	1.44358e-18	up	yes	chrChr11:2380143-2385100:+	gi|356540516|ref|XP_003538734.1|	2287	0	PREDICTED: putative glucuronosyltransferase PGSIP8-like [Glycine max]
Glyma.11G032700.Wm82.a2.v1	6	8	10	19.38	32	30	35	-1.37601	0.000158141	0.00174818	down	yes	chrChr11:2387415-2390834:+	gi|356540518|ref|XP_003538735.1|	1748	0	PREDICTED: probable pectinesterase 68-like [Glycine max]
Glyma.11G036900.Wm82.a2.v1	88	71	48	38.0146	5	4	1	3.21397	1.63955e-18	1.63658e-16	up	yes	chrChr11:2672593-2674284:+	gi|356541157|ref|XP_003539047.1|	2675	0	PREDICTED: phospholipase A1-Ibeta2, chloroplastic-like [Glycine max]
Glyma.11G039400.Wm82.a2.v1	169	132	119	95.3704	51	50	36	1.62303	3.099e-11	1.43653e-09	up	yes	chrChr11:2804287-2807839:-	gi|356541318|ref|XP_003539125.1|	2830	0	PREDICTED: beta-amylase 3, chloroplastic-like isoform 1 [Glycine max]
Glyma.11G040300.Wm82.a2.v1	30	15	31	14.6463	1	3	4	2.02726	6.50572e-07	1.34179e-05	up	yes	chrChr11:2964358-2966331:-	gi|571487212|ref|XP_006590596.1|	664	2e-85	PREDICTED: putative cytochrome c oxidase subunit 6b-like [Glycine max]
Glyma.11G040800.Wm82.a2.v1	448	514	513	321.481	113	115	168	1.95815	4.39924e-25	6.40633e-23	up	yes	chrChr11:2985803-2988541:+	gi|571486416|ref|XP_006590329.1|	1245	4e-169	PREDICTED: uncharacterized protein LOC100802762 isoform X1 [Glycine max]
Glyma.11G043700.Wm82.a2.v1	55	82	52	39.6336	21	14	6	1.87224	4.5365e-08	1.18573e-06	up	yes	chrChr11:3230808-3233276:+	gi|356540613|ref|XP_003538782.1|	1679	0	PREDICTED: transcription factor bHLH25-like [Glycine max]
Glyma.11G044500.Wm82.a2.v1	33	44	48	28.7183	14	19	10	1.3653	5.11617e-05	0.000670443	up	yes	chrChr11:3288912-3292294:-	gi|571487271|ref|XP_006590610.1|	1816	0	PREDICTED: myb-like protein X-like isoform X1 [Glycine max]
Glyma.11G048300.Wm82.a2.v1	5723	7217	5451	4363.36	3012	2381	1831	1.44414	6.23997e-15	4.45661e-13	up	yes	chrChr11:3601241-3607177:+	gi|571487327|ref|XP_003539278.2|	5190	0	PREDICTED: calcium-transporting ATPase 2, plasma membrane-type-like [Glycine max]
Glyma.11G048800.Wm82.a2.v1	529	921	668	454.523	167	186	172	2.04637	1.04583e-23	1.44777e-21	up	yes	chrChr11:3666766-3668758:-	gi|356541645|ref|XP_003539284.1|	2166	0	PREDICTED: probable N-acetyltransferase HLS1-like isoform X1 [Glycine max]
Glyma.11G050200.Wm82.a2.v1	356	312	288	189.087	53	44	36	2.81645	3.65645e-41	9.68498e-39	up	yes	chrChr11:3761037-3762845:+	gi|358249288|ref|NP_001240280.1|	1460	0	uncharacterized protein LOC100813431 [Glycine max]
Glyma.11G052200.Wm82.a2.v1	34	19	36	51.0955	94	62	71	-1.00586	0.000704577	0.00606946	down	yes	chrChr11:3930652-3934025:+	gi|356541733|ref|XP_003539328.1|	1767	0	PREDICTED: microtubule-associated protein RP/EB family member 1C [Glycine max]
Glyma.11G055900.Wm82.a2.v1	59	61	52	102.697	144	185	134	-1.15819	3.87298e-07	8.41079e-06	down	yes	chrChr11:4221420-4223125:-	gi|356537591|ref|XP_003537310.1|	1795	0	PREDICTED: uncharacterized protein LOC100776346 [Glycine max]
Glyma.11G058600.Wm82.a2.v1	15	25	22	54.8874	116	65	101	-1.70561	1.54912e-08	4.40124e-07	down	yes	chrChr11:4425323-4427642:-	gi|356540699|ref|XP_003538823.1|	1559	0	PREDICTED: uncharacterized protein LOC100817326 [Glycine max]
Glyma.11G060200.Wm82.a2.v1	115	73	60	51.5415	7	23	20	1.96139	8.30035e-09	2.48412e-07	up	yes	chrChr11:4545030-4548660:+	gi|356537774|ref|XP_003537400.1|	2851	0	PREDICTED: cytochrome P450 82A3-like [Glycine max]
Glyma.11G061100.Wm82.a2.v1	739	706	695	500.694	211	319	262	1.53203	1.81439e-18	1.80042e-16	up	yes	chrChr11:4581120-4582200:+	gi|356537801|ref|XP_003537413.1|	377	8e-44	PREDICTED: uncharacterized protein LOC100792130 [Glycine max]
Glyma.11G063400.Wm82.a2.v1	77	82	69	40.1289	0	0	0	4.30188	4.44544e-29	7.55254e-27	up	yes	chrChr11:4793316-4797792:+	gi|571487515|ref|XP_006590674.1|	1851	0	PREDICTED: probable vacuolar amino acid transporter YPQ2-like [Glycine max]
Glyma.11G067900.Wm82.a2.v1	5	3	1	9.08306	14	8	26	-1.15134	0.00631957	0.0360312	down	yes	chrChr11:5104849-5105852:-	gi|356538184|ref|XP_003537584.1|	607	5e-77	PREDICTED: uncharacterized protein LOC100819278 [Glycine max]
Glyma.11G068100.Wm82.a2.v1	18	14	11	8.20108	0	1	3	1.66631	7.95781e-05	0.000975913	up	yes	chrChr11:5117760-5118907:-	gi|734423058|gb|KHN41979.1|	398	3e-44	hypothetical protein glysoja_003719 [Glycine soja]
Glyma.11G069000.Wm82.a2.v1	133	119	120	206.405	302	256	344	-1.04956	1.45333e-08	4.1572e-07	down	yes	chrChr11:5182663-5188835:-	gi|356538198|ref|XP_003537591.1|	2850	0	PREDICTED: ATPase family AAA domain-containing protein 3-like [Glycine max]
Glyma.11G073700.Wm82.a2.v1	68	43	82	48.5351	29	32	32	1.04725	0.000427883	0.00399748	up	yes	chrChr11:5499978-5503048:+	gi|571487644|ref|XP_006590706.1|	1149	2e-154	PREDICTED: floral homeotic protein PMADS 1-like isoform X3 [Glycine max]
Glyma.11G075200.Wm82.a2.v1	64	73	88	126.572	146	175	235	-1.03749	1.17158e-05	0.000182626	down	yes	chrChr11:5620558-5625198:+	gi|351723079|ref|NP_001238034.1|	4836	0	receptor-like protein kinase precursor [Glycine max]
Glyma.11G075500.Wm82.a2.v1	1966	2079	1960	1488.26	744	1216	795	1.22554	7.13408e-11	3.07671e-09	up	yes	chrChr11:5658652-5659802:-	gi|571487679|ref|XP_003537627.2|	519	3e-61	PREDICTED: histone H1-like [Glycine max]
Glyma.11G076000.Wm82.a2.v1	510	538	505	854.803	1124	1337	1257	-1.06017	5.28715e-15	3.82483e-13	down	yes	chrChr11:5688314-5689998:-	gi|356538275|ref|XP_003537629.1|	1261	2e-171	PREDICTED: 60S ribosomal protein L8-3-like [Glycine max]
Glyma.11G077300.Wm82.a2.v1	1452	1777	1146	1019.15	617	493	487	1.5484	9.88795e-18	9.088e-16	up	yes	chrChr11:5795953-5801540:+	gi|356540813|ref|XP_003538879.1|	2841	0	PREDICTED: calcium-dependent protein kinase 28-like [Glycine max]
Glyma.11G077400.Wm82.a2.v1	303	474	442	302.742	106	313	144	1.09869	0.000189637	0.00202707	up	yes	chrChr11:5808747-5809882:+	gi|359806673|ref|NP_001241283.1|	761	1e-97	uncharacterized protein LOC100800959 [Glycine max]
Glyma.11G082500.Wm82.a2.v1	892	753	562	437.809	137	125	53	2.65034	1.40445e-23	1.91273e-21	up	yes	chrChr11:6199610-6201527:+	gi|359807145|ref|NP_001241352.1|	998	6e-133	uncharacterized protein LOC100818380 [Glycine max]
Glyma.11G083600.Wm82.a2.v1	39	28	29	57.3012	114	71	74	-1.09291	0.000120187	0.00139316	down	yes	chrChr11:6265374-6277820:-	gi|571487758|ref|XP_006590741.1|	4424	0	PREDICTED: putative DNA (cytosine-5)-methyltransferase CMT1-like [Glycine max]
Glyma.11G085300.Wm82.a2.v1	298	415	455	256.319	107	148	70	1.82462	1.45838e-13	9.11866e-12	up	yes	chrChr11:6416003-6419893:-	gi|571487781|ref|XP_003538908.2|	1879	0	PREDICTED: probable serine/threonine-protein kinase Cx32, chloroplastic-like [Glycine max]
Glyma.11G085400.Wm82.a2.v1	148	199	178	120.972	65	77	41	1.53528	3.10505e-10	1.21596e-08	up	yes	chrChr11:6422962-6427939:-	gi|571487783|ref|XP_006590747.1|	2016	0	PREDICTED: probable serine/threonine-protein kinase Cx32, chloroplastic-like isoform X2 [Glycine max]
Glyma.11G087600.Wm82.a2.v1	211	219	169	148.863	66	154	57	1.09943	0.00018514	0.00198941	up	yes	chrChr11:6588452-6589869:+	gi|356538405|ref|XP_003537694.1|	747	2e-93	PREDICTED: RING-H2 finger protein ATL8-like [Glycine max]
Glyma.11G092600.Wm82.a2.v1	56	31	44	82.2438	144	103	132	-1.21378	3.10771e-06	5.50791e-05	down	yes	chrChr11:7023674-7026886:-	gi|356540922|ref|XP_003538933.1|	3255	0	PREDICTED: dentin sialophosphoprotein-like [Glycine max]
Glyma.11G095700.Wm82.a2.v1	62	39	84	129.064	253	214	151	-1.38555	2.75656e-07	6.21502e-06	down	yes	chrChr11:7263413-7265368:-	gi|734340209|gb|KHN09248.1|	967	5e-128	Ubiquitin-conjugating enzyme E2 19 [Glycine soja]
Glyma.11G096600.Wm82.a2.v1	234	320	92	149.455	72	89	68	1.3951	7.45369e-06	0.000121362	up	yes	chrChr11:7361789-7364386:-	gi|734340218|gb|KHN09257.1|	1452	0	Putative NAC domain-containing protein 94 [Glycine soja]
Glyma.11G100100.Wm82.a2.v1	165	58	53	63.6777	32	20	44	1.29943	0.0002779	0.00279972	up	yes	chrChr11:7589305-7592625:+	gi|571487975|ref|XP_003538960.2|	2990	0	PREDICTED: cytochrome P450 86B1-like [Glycine max]
Glyma.11G103500.Wm82.a2.v1	822	899	1313	1800.54	2363	2589	3148	-1.17856	7.5354e-10	2.7315e-08	down	yes	chrChr11:7857869-7861571:-	gi|356538595|ref|XP_003537788.1|	2977	0	PREDICTED: delta(24)-sterol reductase-like isoform X1 [Glycine max]
Glyma.11G105000.Wm82.a2.v1	29	37	20	50.9619	61	80	88	-1.06881	0.000261588	0.00266896	down	yes	chrChr11:7970211-7975509:-	gi|356541016|ref|XP_003538980.1|	2966	0	PREDICTED: inactive leucine-rich repeat receptor-like serine/threonine-protein kinase At1g60630-like isoform X1 [Glycine max]
Glyma.11G105800.Wm82.a2.v1	121	127	52	55.4608	7	7	3	3.19348	3.73524e-19	3.92656e-17	up	yes	chrChr11:8038613-8039501:+	gi|351721634|ref|NP_001236960.1|	540	2e-66	uncharacterized protein LOC100305807 [Glycine max]
Glyma.11G107600.Wm82.a2.v1	54	36	24	24.5953	17	6	6	1.52047	6.81661e-05	0.000858173	up	yes	chrChr11:8210966-8217508:-	gi|571488153|ref|XP_006590856.1|	4570	0	PREDICTED: beta-galactosidase 13-like isoform X1 [Glycine max]
Glyma.11G119000.Wm82.a2.v1	634	614	1439	683.591	577	431	342	1.02736	0.000178194	0.00192876	up	yes	chrChr11:9042533-9044277:-	gi|356538799|ref|XP_003537888.1|	1126	1e-151	PREDICTED: organ-specific protein S2-like isoform X1 [Glycine max]
Glyma.11G119900.Wm82.a2.v1	279	314	469	222.651	80	60	89	2.18576	7.66268e-21	9.20589e-19	up	yes	chrChr11:9149205-9152820:-	gi|571492029|ref|XP_006592108.1|	2216	0	PREDICTED: putative GPI-anchored protein PB15E9.01c-like isoform X2 [Glycine max]
Glyma.11G120600.Wm82.a2.v1	155	246	171	104.821	7	7	13	3.84048	5.99704e-38	1.40093e-35	up	yes	chrChr11:9200478-9204544:-	gi|571488324|ref|XP_006590901.1|	1933	0	PREDICTED: probable 1-acyl-sn-glycerol-3-phosphate acyltransferase 5-like isoform X2 [Glycine max]
Glyma.11G124700.Wm82.a2.v1	110	112	72	71.3375	35	70	20	1.13788	0.000566562	0.00508229	up	yes	chrChr11:9475831-9476445:-	gi|255630627|gb|ACU15673.1|	358	1e-40	unknown [Glycine max]
Glyma.11G129900.Wm82.a2.v1	461	281	341	249.497	217	118	42	1.06375	0.00919292	0.0484703	up	yes	chrChr11:9890289-9893357:+	gi|356541169|ref|XP_003539053.1|	2720	0	PREDICTED: beta-glucosidase 12-like [Glycine max]
Glyma.11G137300.Wm82.a2.v1	617	913	556	523.675	349	372	282	1.15165	1.35909e-08	3.92096e-07	up	yes	chrChr11:10440672-10442651:+	gi|356538988|ref|XP_003537982.1|	1454	0	PREDICTED: E3 ubiquitin-protein ligase RING1-like [Glycine max]
Glyma.11G139400.Wm82.a2.v1	59	59	72	105.969	160	173	131	-1.03385	2.99323e-06	5.32538e-05	down	yes	chrChr11:10616047-10617753:-	gi|351725225|ref|NP_001236573.1|	488	2e-59	uncharacterized protein LOC100526964 [Glycine max]
Glyma.11G142200.Wm82.a2.v1	1855	1938	2157	1168.21	264	276	234	3.02655	1.48111e-104	1.34657e-101	up	yes	chrChr11:10841923-10842700:-	gi|255631292|gb|ACU16013.1|	434	3e-51	unknown [Glycine max]
Glyma.11G143100.Wm82.a2.v1	28	11	38	104.182	346	84	153	-1.51678	0.000291207	0.00291111	down	yes	chrChr11:10924084-10925772:-	gi|734378303|gb|KHN21988.1|	1266	3e-173	Aquaporin TIP1-3 [Glycine soja]
Glyma.11G144600.Wm82.a2.v1	72	123	50	56.9871	30	29	30	1.36113	1.38825e-05	0.000211981	up	yes	chrChr11:11057446-11059997:+	gi|356541262|ref|XP_003539098.1|	2991	0	PREDICTED: exocyst complex component EXO70B1-like [Glycine max]
Glyma.11G146500.Wm82.a2.v1	619	660	771	478.746	327	235	194	1.52194	5.56809e-15	3.997e-13	up	yes	chrChr11:11300751-11303007:+	gi|356539376|ref|XP_003538174.1|	1501	0	PREDICTED: aquaporin PIP2-7 [Glycine max]
Glyma.11G149200.Wm82.a2.v1	3	1	4	8.14146	8	11	24	-1.12158	0.00791991	0.0429568	down	yes	chrChr11:11611414-11614759:-	gi|734354476|gb|KHN13712.1|	2155	0	Protein IQ-DOMAIN 14 [Glycine soja]
Glyma.11G149600.Wm82.a2.v1	335	356	357	254.963	142	157	152	1.33601	6.0308e-17	5.22861e-15	up	yes	chrChr11:11642938-11645593:-	gi|356539472|ref|XP_003538222.1|	668	2e-85	PREDICTED: uncharacterized protein LOC100797970 [Glycine max]
Glyma.11G150300.Wm82.a2.v1	817	618	837	1263.68	1548	1344	2633	-1.02295	6.73972e-06	0.000110744	down	yes	chrChr11:11779688-11780782:-	gi|734354467|gb|KHN13703.1|	782	1e-100	Disease resistance response protein 206 [Glycine soja]
Glyma.11G153800.Wm82.a2.v1	281	364	300	586.668	860	823	1007	-1.28886	5.90641e-16	4.65306e-14	down	yes	chrChr11:12378018-12385295:-	gi|571486420|ref|XP_006590331.1|	1642	0	PREDICTED: uncharacterized protein LOC100806472 isoform X1 [Glycine max]
Glyma.11G155000.Wm82.a2.v1	2488	1615	1697	1330.2	442	1049	476	1.52879	1.49032e-08	4.25938e-07	up	yes	chrChr11:12662448-12663222:+	gi|734376229|gb|KHN21311.1|	129	6e-07	Early nodulin-12A [Glycine soja]
Glyma.11G156300.Wm82.a2.v1	103	124	102	72.5988	28	38	28	1.77726	2.52429e-12	1.36081e-10	up	yes	chrChr11:13561342-13565059:-	gi|734377621|gb|KHN21695.1|	1623	0	RING finger protein 44 [Glycine soja]
Glyma.11G157100.Wm82.a2.v1	45	74	28	32.5664	15	13	15	1.50148	2.0086e-05	0.000292752	up	yes	chrChr11:13891356-13892161:+	gi|734376244|gb|KHN21326.1|	710	8e-92	Putative calcium-binding protein CML19 [Glycine soja]
Glyma.11G158500.Wm82.a2.v1	416	402	342	647.235	972	968	895	-1.08555	1.22586e-14	8.59095e-13	down	yes	chrChr11:14178918-14180901:-	gi|351722849|ref|NP_001237514.1|	759	8e-99	uncharacterized protein LOC100305587 [Glycine max]
Glyma.11G163300.Wm82.a2.v1	156	190	140	123.889	59	105	81	1.05339	1.2485e-05	0.000192971	up	yes	chrChr11:15312631-15316628:+	gi|356539680|ref|XP_003538323.1|	2589	0	PREDICTED: probable WRKY transcription factor 33 [Glycine max]
Glyma.11G164700.Wm82.a2.v1	2776	2333	1925	1795.39	1517	766	1288	1.06958	1.10443e-06	2.18541e-05	up	yes	chrChr11:15648079-15653438:-	gi|356539666|ref|XP_003538316.1|	1695	0	PREDICTED: cinnamoyl-CoA reductase 1 [Glycine max]
Glyma.11G166500.Wm82.a2.v1	19	31	11	13.5362	7	5	6	1.23809	0.00212367	0.0149546	up	yes	chrChr11:16168280-16172236:+	gi|734418724|gb|KHN39741.1|	2257	0	Vacuolar amino acid transporter 1 [Glycine soja]
Glyma.11G166900.Wm82.a2.v1	47	37	35	27.6895	11	18	14	1.31539	8.49782e-05	0.00103347	up	yes	chrChr11:16205127-16209172:-	gi|734418724|gb|KHN39741.1|	2282	0	Vacuolar amino acid transporter 1 [Glycine soja]
Glyma.11G170300.Wm82.a2.v1	16556	17304	16706	11894.9	7591	5416	6182	1.52619	3.09323e-27	4.88512e-25	up	yes	chrChr11:18242402-18247271:+	gi|356539639|ref|XP_003538303.1|	3041	0	PREDICTED: asparagine synthetase [glutamine-hydrolyzing] 2-like [Glycine max]
Glyma.11G171400.Wm82.a2.v1	2740	2893	2878	2105.78	1537	1142	1215	1.26427	2.26796e-19	2.44526e-17	up	yes	chrChr11:18518857-18523733:-	gi|356539639|ref|XP_003538303.1|	3046	0	PREDICTED: asparagine synthetase [glutamine-hydrolyzing] 2-like [Glycine max]
Glyma.11G178400.Wm82.a2.v1	1414	1416	1346	891.2	325	318	356	2.18254	4.35271e-65	2.40034e-62	up	yes	chrChr11:23616689-23620694:+	gi|356541641|ref|XP_003539282.1|	2561	0	PREDICTED: non-specific phospholipase C1-like [Glycine max]
Glyma.11G180500.Wm82.a2.v1	1852	1901	1910	1381.3	914	1064	482	1.26793	1.95342e-08	5.42619e-07	up	yes	chrChr11:24617430-24620230:-	gi|356539219|ref|XP_003538097.1|	1461	0	PREDICTED: probable CCR4-associated factor 1 homolog 11 [Glycine max]
Glyma.11G188700.Wm82.a2.v1	18	16	14	28.816	31	58	41	-1.01076	0.00284934	0.01898	down	yes	chrChr11:26035306-26037289:-	gi|734416947|gb|KHN38664.1|	1261	2e-166	hypothetical protein glysoja_008213 [Glycine soja]
Glyma.11G189500.Wm82.a2.v1	142	140	82	256.261	342	365	522	-1.44951	7.86825e-10	2.83991e-08	down	yes	chrChr11:26160266-26163387:+	gi|734416955|gb|KHN38672.1|	994	8e-130	Histone deacetylase HDT1 [Glycine soja]
Glyma.11G192400.Wm82.a2.v1	23	29	47	22.7391	8	10	16	1.2652	0.000609316	0.00538822	up	yes	chrChr11:26552983-26554975:-	gi|356541448|ref|XP_003539188.1|	1886	0	PREDICTED: protein SENSITIVE TO PROTON RHIZOTOXICITY 1-like [Glycine max]
Glyma.11G196600.Wm82.a2.v1	43	15	6	11.764	1	2	0	1.83194	1.46132e-05	0.000221729	up	yes	chrChr11:27091733-27094313:+	gi|356541473|ref|XP_003539200.1|	1482	0	PREDICTED: bifunctional monodehydroascorbate reductase and carbonic anhydrase nectarin-3-like [Glycine max]
Glyma.11G198300.Wm82.a2.v1	1120	2067	705	956.516	532	648	561	1.17683	1.24854e-05	0.000192971	up	yes	chrChr11:27512870-27516105:+	gi|593692708|ref|XP_007146896.1|	2178	0	hypothetical protein PHAVU_006G079500g [Phaseolus vulgaris]
Glyma.11G208700.Wm82.a2.v1	721	908	685	490.38	67	292	171	1.53682	0.000102715	0.00121703	up	yes	chrChr11:29913702-29915150:+	gi|356539771|ref|XP_003538367.1|	927	2e-122	PREDICTED: uncharacterized protein DDB_G0271670 [Glycine max]
Glyma.11G212000.Wm82.a2.v1	138	96	116	82.08	59	40	32	1.41477	9.74572e-08	2.36364e-06	up	yes	chrChr11:30452236-30454838:+	gi|356546063|ref|XP_003541451.1|	2598	0	PREDICTED: cytochrome P450 94A1-like [Glycine max]
Glyma.11G214500.Wm82.a2.v1	159	212	72	92.9218	39	33	24	1.96458	6.90265e-10	2.53491e-08	up	yes	chrChr11:30799120-30800854:+	gi|356539810|ref|XP_003538386.1|	2090	0	PREDICTED: U-box domain-containing protein 21-like [Glycine max]
Glyma.11G215600.Wm82.a2.v1	73	82	64	123.492	196	155	193	-1.06502	3.81863e-07	8.30349e-06	down	yes	chrChr11:30926213-30933455:+	gi|356537898|ref|XP_003537443.1|	4819	0	PREDICTED: condensin complex subunit 3-like isoform X1 [Glycine max]
Glyma.11G215700.Wm82.a2.v1	358	402	566	995.778	1577	1841	1458	-1.62099	2.77877e-18	2.73319e-16	down	yes	chrChr11:30948286-30950317:+	gi|734366019|gb|KHN17955.1|	1000	1e-132	Nudix hydrolase 17, mitochondrial [Glycine soja]
Glyma.11G216000.Wm82.a2.v1	13	13	14	26.8955	41	45	41	-1.21552	0.000208604	0.00219853	down	yes	chrChr11:31024297-31028374:+	gi|356539822|ref|XP_003538392.1|	2422	0	PREDICTED: glucan endo-1,3-beta-glucosidase 2-like [Glycine max]
Glyma.11G220900.Wm82.a2.v1	598	375	364	283.3	193	82	32	1.33998	0.00126744	0.00981706	up	yes	chrChr11:31613010-31615360:-	gi|571489943|ref|XP_003537463.2|	3162	0	PREDICTED: L-type lectin-domain containing receptor kinase S.4-like [Glycine max]
Glyma.11G226200.Wm82.a2.v1	591	579	660	421.622	245	229	163	1.61609	9.97581e-20	1.08953e-17	up	yes	chrChr11:32132192-32138968:+	gi|571490010|ref|XP_006591369.1|	2045	0	PREDICTED: probable sugar phosphate/phosphate translocator At3g11320-like isoform X2 [Glycine max]
Glyma.11G229100.Wm82.a2.v1	1073	888	641	613.171	426	331	236	1.44236	1.84263e-10	7.37909e-09	up	yes	chrChr11:32444999-32448227:-	gi|734408365|gb|KHN34727.1|	975	6e-128	hypothetical protein glysoja_039023 [Glycine soja]
Glyma.11G231300.Wm82.a2.v1	76	61	60	125.299	224	223	133	-1.25609	3.08998e-07	6.87004e-06	down	yes	chrChr11:32690044-32692317:+	gi|734323648|gb|KHN04774.1|	1238	5e-165	Transcription factor bHLH51 [Glycine soja]
Glyma.11G231600.Wm82.a2.v1	41	31	26	21.1728	7	10	8	1.59944	1.09499e-05	0.000171801	up	yes	chrChr11:32726840-32728526:+	gi|356539991|ref|XP_003538475.1|	2115	0	PREDICTED: taxadien-5-alpha-ol O-acetyltransferase-like [Glycine max]
Glyma.11G231700.Wm82.a2.v1	119	129	122	77.9198	31	23	28	2.12312	6.1227e-18	5.76923e-16	up	yes	chrChr11:32734340-32742549:-	gi|571490084|ref|XP_003538476.2|	3938	0	PREDICTED: uncharacterized protein LOC100804343 isoform X1 [Glycine max]
Glyma.11G233300.Wm82.a2.v1	589	804	987	569.898	336	402	229	1.35638	1.76501e-09	5.99125e-08	up	yes	chrChr11:32849168-32850385:-	gi|571490109|ref|XP_003538484.2|	1290	8e-176	PREDICTED: abscisic acid receptor PYL4-like [Glycine max]
Glyma.11G237200.Wm82.a2.v1	157	188	117	280.4	405	383	486	-1.21564	1.09389e-09	3.83304e-08	down	yes	chrChr11:33175648-33178869:+	gi|734323698|gb|KHN04824.1|	1306	4e-177	rRNA 2'-O-methyltransferase fibrillarin 2 [Glycine soja]
Glyma.11G238500.Wm82.a2.v1	529	1234	1059	2252.5	3817	2708	4723	-1.641	1.02963e-10	4.3133e-09	down	yes	chrChr11:33290540-33298235:-	gi|571541774|ref|XP_006601860.1|	3223	0	PREDICTED: early nodulin-70 isoform X1 [Glycine max]
Glyma.11G239300.Wm82.a2.v1	2546	1787	1111	1400.83	1005	1020	802	1.02306	1.45931e-05	0.000221624	up	yes	chrChr11:33372414-33375549:+	gi|571490505|ref|XP_006591511.1|	1955	0	PREDICTED: probable trehalose-phosphate phosphatase J-like [Glycine max]
Glyma.11G239400.Wm82.a2.v1	6503	6340	5986	3789.77	1001	1123	916	2.73604	3.99204e-101	3.44328e-98	up	yes	chrChr11:33387740-33388807:+	gi|356540299|ref|XP_003538627.1|	987	3e-132	PREDICTED: uncharacterized protein LOC100793024 [Glycine max]
Glyma.11G242100.Wm82.a2.v1	88	80	123	69.3733	39	53	24	1.28964	9.79135e-06	0.000155169	up	yes	chrChr11:33606037-33607042:+	gi|571542279|ref|XP_003552019.2|	573	4e-69	PREDICTED: uncharacterized protein LOC100780058 [Glycine max]
Glyma.11G247600.Wm82.a2.v1	3318	2826	3945	2326.73	1235	1162	1126	1.63503	1.41884e-27	2.27278e-25	up	yes	chrChr11:34032568-34035339:+	gi|359806082|ref|NP_001241184.1|	1616	0	uncharacterized protein LOC100807342 [Glycine max]
Glyma.11G248300.Wm82.a2.v1	449	515	554	310.333	68	98	110	2.47435	1.03137e-35	2.23834e-33	up	yes	chrChr11:34082545-34086028:+	gi|356540166|ref|XP_003538561.1|	668	4e-82	PREDICTED: uncharacterized protein LOC100804874 [Glycine max]
Glyma.11G250400.Wm82.a2.v1	10	12	22	26.8294	38	52	32	-1.00764	0.0042016	0.025943	down	yes	chrChr11:34209157-34213457:+	gi|571490317|ref|XP_006591457.1|	2713	0	PREDICTED: HORMA domain-containing protein 1-like [Glycine max]
Glyma.11G253200.Wm82.a2.v1	50	34	33	69.1991	108	99	104	-1.11403	1.06657e-05	0.000167658	down	yes	chrChr11:34404329-34410760:-	gi|356538071|ref|XP_003537528.1|	5782	0	PREDICTED: kinesin-like protein KIN12B-like isoform X1 [Glycine max]
Glyma.11G254300.Wm82.a2.v1	260	196	200	170.089	109	111	129	1.01883	2.99766e-07	6.70666e-06	up	yes	chrChr11:34480075-34483869:+	gi|356540103|ref|XP_003538530.1|	2565	0	PREDICTED: selenium-binding protein 1-like [Glycine max]
Glyma.12G002400.Wm82.a2.v1	297	296	160	181.768	116	113	86	1.29528	1.4466e-07	3.41011e-06	up	yes	chrChr12:197288-200229:+	gi|351727198|ref|NP_001235105.1|	3835	0	cytokinin-regulated kinase precursor [Glycine max]
Glyma.12G007500.Wm82.a2.v1	2069	2457	2510	1369.84	290	288	265	3.14241	2.55319e-113	3.06739e-110	up	yes	chrChr12:553730-557753:+	gi|359806067|ref|NP_001240926.1|	2495	0	uncharacterized protein LOC100807555 precursor [Glycine max]
Glyma.12G008800.Wm82.a2.v1	5	8	4	17.794	47	27	21	-1.55642	6.96744e-05	0.00087487	down	yes	chrChr12:653597-657728:+	gi|734348122|gb|KHN11700.1|	229	1e-43	hypothetical protein glysoja_006153 [Glycine soja]
Glyma.12G011700.Wm82.a2.v1	342	620	227	298.954	275	142	160	1.0448	0.000388204	0.00368438	up	yes	chrChr12:853112-856650:-	gi|571491619|ref|XP_006591996.1|	4758	0	PREDICTED: disease resistance protein RPP13-like [Glycine max]
Glyma.12G012200.Wm82.a2.v1	101	28	54	39.9439	16	18	15	1.56104	1.66331e-05	0.00024692	up	yes	chrChr12:895961-899249:+	gi|351723133|ref|NP_001237524.1|	2225	0	polygalacturonase precursor [Glycine max]
Glyma.12G013200.Wm82.a2.v1	4746	5354	4447	3060.75	926	1149	1126	2.28475	1.94329e-57	8.71605e-55	up	yes	chrChr12:955725-959879:+	gi|356543060|ref|XP_003539981.1|	2556	0	PREDICTED: putative glycerol-3-phosphate transporter 1-like isoform X1 [Glycine max]
Glyma.12G015800.Wm82.a2.v1	448	457	386	265.473	106	83	56	2.39574	1.49678e-29	2.62241e-27	up	yes	chrChr12:1126280-1132370:-	gi|571491668|ref|XP_006592009.1|	6465	0	PREDICTED: flagellar attachment zone protein 1-like isoform X2 [Glycine max]
Glyma.12G017000.Wm82.a2.v1	78	26	32	31.48	19	12	17	1.23889	0.000814567	0.00685374	up	yes	chrChr12:1199781-1201553:-	gi|571491684|ref|XP_006592013.1|	1813	0	PREDICTED: transcription factor MYB39 [Glycine max]
Glyma.12G017700.Wm82.a2.v1	45	78	52	109.983	156	122	229	-1.20216	1.0465e-05	0.00016481	down	yes	chrChr12:1240464-1244675:+	gi|356543350|ref|XP_003540124.1|	3042	0	PREDICTED: ATPase family AAA domain-containing protein 3-B-like [Glycine max]
Glyma.12G018900.Wm82.a2.v1	30	10	12	40.7346	73	72	57	-1.41941	2.79205e-05	0.000395293	down	yes	chrChr12:1327640-1331464:-	gi|356544345|ref|XP_003540613.1|	2942	0	PREDICTED: uncharacterized protein LOC100787589 [Glycine max]
Glyma.12G020400.Wm82.a2.v1	59	45	64	32.5433	10	5	4	2.5272	5.72524e-13	3.33203e-11	up	yes	chrChr12:1445666-1452363:-	gi|356543642|ref|XP_003540269.1|	3308	0	PREDICTED: ABC transporter G family member 15-like isoform X1 [Glycine max]
Glyma.12G021800.Wm82.a2.v1	79	53	59	124.313	200	224	156	-1.31146	1.82178e-08	5.09417e-07	down	yes	chrChr12:1572976-1574844:-	gi|571491180|ref|XP_006591818.1|	963	7e-128	PREDICTED: uncharacterized protein LOC100305664 isoform X1 [Glycine max]
Glyma.12G022800.Wm82.a2.v1	630	761	550	492.009	283	473	205	1.0698	1.66321e-05	0.00024692	up	yes	chrChr12:1675697-1677804:-	gi|356543973|ref|XP_003540432.1|	1299	1e-176	PREDICTED: expansin-like A2-like [Glycine max]
Glyma.12G030300.Wm82.a2.v1	243	106	154	128.03	89	72	91	1.03407	0.000142534	0.00160533	up	yes	chrChr12:2264202-2265191:+	gi|571491868|ref|XP_003540811.2|	1021	3e-137	PREDICTED: dirigent protein 23-like [Glycine max]
Glyma.12G030700.Wm82.a2.v1	90	71	42	41.3615	20	13	3	1.95493	1.2888e-07	3.06822e-06	up	yes	chrChr12:2284184-2285225:+	gi|358248746|ref|NP_001239933.1|	544	3e-66	uncharacterized protein LOC100798520 [Glycine max]
Glyma.12G035700.Wm82.a2.v1	41	33	17	18.3761	3	5	7	1.83527	3.14605e-06	5.56706e-05	up	yes	chrChr12:2606567-2607636:+	gi|734387678|gb|KHN25441.1|	559	2e-68	Auxin-induced protein 15A [Glycine soja]
Glyma.12G039200.Wm82.a2.v1	32	40	17	57.6222	112	70	87	-1.20577	6.81311e-05	0.000858054	down	yes	chrChr12:2836497-2842464:+	gi|356545098|ref|XP_003540982.1|	3951	0	PREDICTED: DNA replication licensing factor mcm4-B-like [Glycine max]
Glyma.12G043500.Wm82.a2.v1	1191	1077	572	618.427	280	364	113	1.43786	0.000220297	0.00230285	up	yes	chrChr12:3148801-3150720:-	gi|571492016|ref|XP_006592105.1|	2318	0	PREDICTED: BTB/POZ domain-containing protein At3g50780-like [Glycine max]
Glyma.12G049300.Wm82.a2.v1	249	198	148	149.566	87	145	54	1.05857	0.000269973	0.0027379	up	yes	chrChr12:3538428-3539170:-	gi|734387558|gb|KHN25321.1|	422	1e-49	hypothetical protein glysoja_010238 [Glycine soja]
Glyma.12G050900.Wm82.a2.v1	30	15	14	41.3411	67	65	66	-1.31184	2.82141e-05	0.000398489	down	yes	chrChr12:3656478-3663614:+	gi|356544508|ref|XP_003540692.1|	2799	0	PREDICTED: 3beta-hydroxysteroid-dehydrogenase/decarboxylase isoform 3-like isoform X1 [Glycine max]
Glyma.12G053800.Wm82.a2.v1	258	339	826	347.349	195	254	171	1.15957	0.000134935	0.00153606	up	yes	chrChr12:3865217-3871740:+	gi|734387515|gb|KHN25278.1|	2672	0	Non-cyanogenic beta-glucosidase [Glycine soja]
Glyma.12G054100.Wm82.a2.v1	347	307	273	208.099	104	137	46	1.63407	3.58705e-09	1.15358e-07	up	yes	chrChr12:3901359-3904209:+	gi|356544535|ref|XP_003540705.1|	2814	0	PREDICTED: beta-glucosidase 12-like [Glycine max]
Glyma.12G055200.Wm82.a2.v1	90	54	93	145.199	230	229	203	-1.20878	7.61272e-08	1.88575e-06	down	yes	chrChr12:3998947-3999707:-	gi|357502337|ref|XP_003621457.1|	714	2e-91	Histone H3 [Medicago truncatula]
Glyma.12G056700.Wm82.a2.v1	46	44	52	98.8198	193	146	134	-1.43055	1.06787e-09	3.76146e-08	down	yes	chrChr12:4123137-4123683:+	gi|593160629|ref|XP_007131999.1|	239	7e-23	hypothetical protein PHAVU_011G058200g [Phaseolus vulgaris]
Glyma.12G060300.Wm82.a2.v1	27	33	14	16.1292	12	3	5	1.32375	0.00101015	0.00819199	up	yes	chrChr12:4349673-4352910:-	gi|734402664|gb|KHN32147.1|	458	8e-53	hypothetical protein glysoja_028942 [Glycine soja]
Glyma.12G061000.Wm82.a2.v1	17	17	21	32.3281	50	40	55	-1.02263	0.00110585	0.00879424	down	yes	chrChr12:4431157-4432015:-	gi|356542409|ref|XP_003539659.1|	243	3e-23	PREDICTED: putative uncharacterized protein DDB_G0277255-like [Glycine max]
Glyma.12G061400.Wm82.a2.v1	294	343	293	234.723	114	171	169	1.13325	1.15957e-08	3.39485e-07	up	yes	chrChr12:4469347-4479909:+	gi|356542417|ref|XP_003539663.1|	4206	0	PREDICTED: ATP-dependent zinc metalloprotease FTSH 10, mitochondrial-like isoform X1 [Glycine max]
Glyma.12G062900.Wm82.a2.v1	272	290	270	211.056	121	167	125	1.11936	2.33086e-09	7.79401e-08	up	yes	chrChr12:4606843-4610782:-	gi|358248046|ref|NP_001240055.1|	2376	0	protein kinase APK1A, chloroplastic-like [Glycine max]
Glyma.12G063400.Wm82.a2.v1	38	29	17	49.0088	78	72	69	-1.03584	0.000463572	0.00428399	down	yes	chrChr12:4648141-4651679:-	gi|356542441|ref|XP_003539675.1|	2022	0	PREDICTED: actin-like isoform X1 [Glycine max]
Glyma.12G065500.Wm82.a2.v1	1751	1849	1938	1058.95	191	208	140	3.39497	2.60774e-96	2.19304e-93	up	yes	chrChr12:4810594-4811337:-	gi|255631292|gb|ACU16013.1|	258	3e-25	unknown [Glycine max]
Glyma.12G067800.Wm82.a2.v1	116	98	177	218.87	294	396	269	-1.02698	1.49888e-05	0.000226814	down	yes	chrChr12:4971285-4972459:+	gi|574584467|ref|NP_001276235.1|	418	2e-46	uncharacterized protein LOC102669970 [Glycine max]
Glyma.12G073000.Wm82.a2.v1	744	1125	595	623.3	410	448	357	1.10753	2.56868e-07	5.82403e-06	up	yes	chrChr12:5388370-5391780:-	gi|356542571|ref|XP_003539740.1|	1912	0	PREDICTED: mitogen-activated protein kinase 3-like [Glycine max]
Glyma.12G075400.Wm82.a2.v1	6191	5158	8268	4475.62	3206	2016	1333	1.58783	1.91819e-10	7.67252e-09	up	yes	chrChr12:5747587-5750039:-	gi|734327128|gb|KHN05685.1|	1410	0	Aquaporin PIP2-7 [Glycine soja]
Glyma.12G084700.Wm82.a2.v1	237	237	162	348.016	476	507	527	-1.02417	1.61714e-08	4.58289e-07	down	yes	chrChr12:6839463-6843048:-	gi|351727527|ref|NP_001235884.1|	1009	2e-131	histone deacetylase HDT1 [Glycine max]
Glyma.12G087200.Wm82.a2.v1	350	486	816	369.782	232	224	51	1.10153	0.00801215	0.0434212	up	yes	chrChr12:7091681-7093748:-	gi|571492691|ref|XP_006592314.1|	2571	0	PREDICTED: cytochrome P450 94A1-like [Glycine max]
Glyma.12G088500.Wm82.a2.v1	201	157	146	104.387	36	38	26	2.26868	2.56668e-20	2.91691e-18	up	yes	chrChr12:7249320-7251749:+	gi|571492706|ref|XP_006592318.1|	1727	0	PREDICTED: uncharacterized protein LOC100803294 isoform X2 [Glycine max]
Glyma.12G091200.Wm82.a2.v1	73	64	19	35.312	12	29	9	1.2474	0.00136628	0.010455	up	yes	chrChr12:7464025-7465647:+	gi|356542768|ref|XP_003539837.1|	1295	6e-177	PREDICTED: NAC domain-containing protein 90-like [Glycine max]
Glyma.12G093100.Wm82.a2.v1	1519	1317	1056	890.125	530	571	210	1.54448	8.29584e-09	2.48412e-07	up	yes	chrChr12:7618168-7619955:+	gi|356542778|ref|XP_003539842.1|	1484	0	PREDICTED: probable CCR4-associated factor 1 homolog 9-like [Glycine max]
Glyma.12G097200.Wm82.a2.v1	125	100	137	81.3757	51	42	20	1.60676	1.9408e-08	5.39559e-07	up	yes	chrChr12:8315540-8316856:+	gi|356542808|ref|XP_003539857.1|	1890	0	PREDICTED: mitogen-activated protein kinase kinase kinase A-like [Glycine max]
Glyma.12G104200.Wm82.a2.v1	1101	846	913	666.418	434	434	174	1.45871	1.78077e-08	4.98778e-07	up	yes	chrChr12:9376738-9378420:-	gi|358248958|ref|NP_001239969.1|	1114	1e-147	uncharacterized protein LOC100790588 [Glycine max]
Glyma.12G104800.Wm82.a2.v1	302	266	191	157.91	96	47	13	1.36603	0.00111166	0.0088384	up	yes	chrChr12:9503859-9505287:+	gi|356544870|ref|XP_003540870.1|	1492	0	PREDICTED: myb-related protein Myb4 isoform X1 [Glycine max]
Glyma.12G109800.Wm82.a2.v1	231	181	183	153.014	115	77	117	1.03931	1.70322e-06	3.22605e-05	up	yes	chrChr12:10458911-10466392:-	gi|356542907|ref|XP_003539906.1|	1892	0	PREDICTED: (RS)-norcoclaurine 6-O-methyltransferase-like [Glycine max]
Glyma.12G110100.Wm82.a2.v1	272	224	161	160.827	121	114	54	1.19604	1.25043e-05	0.000193128	up	yes	chrChr12:10502406-10503385:+	gi|351723433|ref|NP_001235487.1|	447	6e-52	uncharacterized protein LOC100527140 [Glycine max]
Glyma.12G110400.Wm82.a2.v1	19	26	17	14.8072	10	6	9	1.04393	0.00657185	0.037136	up	yes	chrChr12:10524535-10530697:+	gi|734402349|gb|KHN31960.1|	1723	0	Ethylene-responsive transcription factor ERF053 [Glycine soja]
Glyma.12G112000.Wm82.a2.v1	263	227	174	151.9	90	84	50	1.58016	9.50184e-11	3.9954e-09	up	yes	chrChr12:10904580-10907950:-	gi|574584327|ref|NP_001276157.1|	1189	3e-161	E3 ubiquitin-protein ligase RMA1H1-like [Glycine max]
Glyma.12G114200.Wm82.a2.v1	4072	3728	4356	2379.96	517	685	332	2.94164	1.9307e-43	5.41223e-41	up	yes	chrChr12:11290782-11294451:+	gi|356544958|ref|XP_003540913.1|	1421	0	PREDICTED: uncharacterized protein LOC100815222 isoform X1 [Glycine max]
Glyma.12G120600.Wm82.a2.v1	27	29	32	80.1394	129	79	206	-1.7323	1.85838e-08	5.18788e-07	down	yes	chrChr12:12870977-12873261:-	gi|356543006|ref|XP_003539954.1|	992	6e-131	PREDICTED: rac-like GTP-binding protein RAC2-like [Glycine max]
Glyma.12G128800.Wm82.a2.v1	120	110	70	71.5589	45	38	37	1.32299	8.61144e-07	1.73382e-05	up	yes	chrChr12:14260714-14264767:-	gi|734407276|gb|KHN34238.1|	3378	0	hypothetical protein glysoja_035873 [Glycine soja]
Glyma.12G129900.Wm82.a2.v1	172	199	228	122.941	33	52	27	2.33467	9.31103e-21	1.10287e-18	up	yes	chrChr12:14527788-14529198:+	gi|359811329|ref|NP_001241436.1|	1273	2e-172	uncharacterized protein LOC100811994 [Glycine max]
Glyma.12G130200.Wm82.a2.v1	257	225	123	144.442	115	93	35	1.2328	0.00011229	0.0013128	up	yes	chrChr12:14610787-14613900:+	gi|356543110|ref|XP_003540006.1|	2821	0	PREDICTED: beta-glucosidase 12-like [Glycine max]
Glyma.12G137700.Wm82.a2.v1	44	99	133	61.5997	47	22	15	1.44324	5.5205e-05	0.000713422	up	yes	chrChr12:16408854-16412451:+	gi|571493338|ref|XP_006592516.1|	2909	0	PREDICTED: chitin-inducible gibberellin-responsive protein 1-like [Glycine max]
Glyma.12G148300.Wm82.a2.v1	36	42	18	23.2998	14	13	14	1.05945	0.00334648	0.0216224	up	yes	chrChr12:20833943-20835080:-	gi|356543266|ref|XP_003540083.1|	266	6e-26	PREDICTED: uncharacterized protein LOC100810234 [Glycine max]
Glyma.12G154500.Wm82.a2.v1	42	40	41	68.7059	101	111	89	-1.0173	2.88925e-05	0.000406659	down	yes	chrChr12:24117367-24118717:-	gi|734385983|gb|KHN24808.1|	664	3e-82	hypothetical protein glysoja_047595 [Glycine soja]
Glyma.12G164000.Wm82.a2.v1	70	75	118	152.622	273	241	167	-1.08568	1.2001e-05	0.00018664	down	yes	chrChr12:31860632-31861725:-	gi|351725061|ref|NP_001237847.1|	427	3e-48	uncharacterized protein LOC100527815 [Glycine max]
Glyma.12G171600.Wm82.a2.v1	39	25	21	17.1685	4	7	3	1.84443	2.61376e-06	4.75267e-05	up	yes	chrChr12:32745419-32747843:-	gi|356541898|ref|XP_003539409.1|	1874	0	PREDICTED: NAC domain-containing protein 2-like [Glycine max]
Glyma.12G172300.Wm82.a2.v1	113	96	92	75.4163	34	76	33	1.06119	0.000368316	0.00352784	up	yes	chrChr12:32867672-32868647:-	gi|356543454|ref|XP_003540175.1|	785	3e-102	PREDICTED: uncharacterized protein LOC100817341 [Glycine max]
Glyma.12G173200.Wm82.a2.v1	2201	2246	2193	1582.83	855	900	894	1.4699	7.15317e-39	1.74366e-36	up	yes	chrChr12:32981652-32988150:-	gi|356543460|ref|XP_003540178.1|	3844	0	PREDICTED: 4-hydroxy-3-methylbut-2-en-1-yl diphosphate synthase, chloroplastic-like isoform X1 [Glycine max]
Glyma.12G179100.Wm82.a2.v1	32	12	30	44.47	68	79	54	-1.04102	0.00129765	0.0100073	down	yes	chrChr12:33895132-33895978:+	gi|590587799|ref|XP_007016059.1|	472	7e-56	Histone superfamily protein [Theobroma cacao]
Glyma.12G179800.Wm82.a2.v1	385	549	475	356.479	233	238	224	1.13859	3.88418e-11	1.76329e-09	up	yes	chrChr12:34009158-34014157:-	gi|356543524|ref|XP_003540210.1|	2476	0	PREDICTED: aspartic proteinase-like protein 2-like [Glycine max]
Glyma.12G181400.Wm82.a2.v1	374	367	287	606.318	871	792	1059	-1.18016	5.41372e-12	2.76346e-10	down	yes	chrChr12:34193664-34197110:-	gi|363807088|ref|NP_001242333.1|	1047	5e-137	uncharacterized protein LOC100795506 [Glycine max]
Glyma.12G181700.Wm82.a2.v1	38	38	41	28.0997	14	15	19	1.19403	0.000224155	0.00233375	up	yes	chrChr12:34238057-34239400:-	gi|734392568|gb|KHN27675.1|	370	8e-41	Putative phytosulfokines 6 [Glycine soja]
Glyma.12G182500.Wm82.a2.v1	338	318	450	206.566	25	22	29	3.68497	5.6843e-56	2.39018e-53	up	yes	chrChr12:34361981-34364097:-	gi|571494077|ref|XP_006592740.1|	357	2e-41	PREDICTED: uncharacterized protein LOC100800807 isoform X2 [Glycine max]
Glyma.12G184300.Wm82.a2.v1	149	203	158	102.512	33	19	30	2.52086	3.28594e-23	4.40381e-21	up	yes	chrChr12:34553293-34556754:+	gi|356543592|ref|XP_003540244.1|	1785	0	PREDICTED: uncharacterized protein LOC100808779 isoform X1 [Glycine max]
Glyma.12G184400.Wm82.a2.v1	1272	1440	1041	663.757	5	8	8	6.648	1.68631e-142	2.83629e-139	up	yes	chrChr12:34559090-34566079:+	gi|734392544|gb|KHN27651.1|	3060	0	ABSCISIC ACID-INSENSITIVE 5-like protein 1 [Glycine soja]
Glyma.12G184500.Wm82.a2.v1	172	181	114	119.993	92	82	68	1.02565	1.31501e-05	0.000201577	up	yes	chrChr12:34579255-34588903:-	gi|356542019|ref|XP_003539469.1|	2217	0	PREDICTED: TGACG-sequence-specific DNA-binding protein TGA-2.1-like isoform X1 [Glycine max]
Glyma.12G186800.Wm82.a2.v1	152	166	136	104.956	51	88	21	1.38212	1.55589e-05	0.000234702	up	yes	chrChr12:34749304-34751194:+	gi|571494171|ref|XP_006592770.1|	1392	0	PREDICTED: F-box protein At2g27310-like [Glycine max]
Glyma.12G200800.Wm82.a2.v1	306	635	698	366.884	177	272	54	1.09818	0.00821672	0.044402	up	yes	chrChr12:36171422-36172093:+	gi|356543784|ref|XP_003540340.1|	382	7e-44	PREDICTED: uncharacterized protein LOC100815403 [Glycine max]
Glyma.12G201800.Wm82.a2.v1	1	3	5	9.86852	20	25	8	-1.26004	0.00272304	0.0182908	down	yes	chrChr12:36224847-36225423:+	gi|571501848|ref|XP_003543352.2|	423	6e-50	PREDICTED: uncharacterized protein LOC100790961 [Glycine max]
Glyma.12G201900.Wm82.a2.v1	480	425	404	722.846	971	1086	1092	-1.06358	5.73811e-14	3.75534e-12	down	yes	chrChr12:36231547-36234686:-	gi|351727120|ref|NP_001235614.1|	1060	7e-139	uncharacterized protein LOC100499758 [Glycine max]
Glyma.12G203100.Wm82.a2.v1	371	274	198	198.647	172	100	50	1.31563	2.0844e-05	0.000303274	up	yes	chrChr12:36353913-36356238:+	gi|734392961|gb|KHN27877.1|	2002	0	Ethylene-responsive transcription factor ERF053 [Glycine soja]
Glyma.12G203700.Wm82.a2.v1	921	801	915	576.096	290	270	156	1.92182	1.70576e-20	1.97862e-18	up	yes	chrChr12:36406747-36413696:+	gi|356543819|ref|XP_003540357.1|	2508	0	PREDICTED: uncharacterized protein LOC100779572 isoform X1 [Glycine max]
Glyma.12G205700.Wm82.a2.v1	15	16	15	37.8503	92	41	58	-1.50791	6.31374e-06	0.000104522	down	yes	chrChr12:36599968-36601567:+	gi|571494442|ref|XP_003540372.2|	1982	0	PREDICTED: zinc finger CCCH domain-containing protein 2-like [Glycine max]
Glyma.12G206000.Wm82.a2.v1	15	10	15	27.6315	57	34	41	-1.2268	0.000318034	0.00313001	down	yes	chrChr12:36628956-36632130:+	gi|356542162|ref|XP_003539539.1|	1867	0	PREDICTED: reticulon-like protein B17-like [Glycine max]
Glyma.12G206700.Wm82.a2.v1	99	152	56	71.0607	32	55	22	1.33102	7.69836e-05	0.000947548	up	yes	chrChr12:36669426-36670245:+	gi|356543867|ref|XP_003540380.1|	158	2e-11	PREDICTED: uncharacterized protein LOC100791118 [Glycine max]
Glyma.12G207200.Wm82.a2.v1	54	46	34	27.8288	6	14	7	1.8836	1.2725e-07	3.03156e-06	up	yes	chrChr12:36703148-36706735:-	gi|571494476|ref|XP_003539541.2|	2472	0	PREDICTED: zinc finger protein MAGPIE-like [Glycine max]
Glyma.12G210300.Wm82.a2.v1	591	624	641	421.884	222	148	240	1.68871	6.02898e-20	6.71553e-18	up	yes	chrChr12:36935825-36941031:-	gi|571494520|ref|XP_006592867.1|	1783	0	PREDICTED: pseudouridine-5'-monophosphatase-like isoform X1 [Glycine max]
Glyma.12G211200.Wm82.a2.v1	70	51	59	45.4254	35	16	37	1.01079	0.00116556	0.00916913	up	yes	chrChr12:37016358-37017036:+	gi|734393029|gb|KHN27945.1|	431	1e-51	hypothetical protein glysoja_007677 [Glycine soja]
Glyma.12G215300.Wm82.a2.v1	78	83	63	167.14	283	318	216	-1.5761	2.93094e-13	1.77009e-11	down	yes	chrChr12:37450269-37452271:-	gi|356543958|ref|XP_003540425.1|	1038	1e-137	PREDICTED: 21.7 kDa class VI heat shock protein-like [Glycine max]
Glyma.12G217400.Wm82.a2.v1	184386	207099	184120	141135	89848	87110	77997	1.32015	1.58058e-29	2.75488e-27	up	yes	chrChr12:37700474-37703715:+	gi|255642543|gb|ACU21535.1|	1495	0	unknown [Glycine max]
Glyma.12G217700.Wm82.a2.v1	56	56	54	40.1966	15	37	18	1.15926	0.00034549	0.00334522	up	yes	chrChr12:37731637-37732452:+	gi|356543980|ref|XP_003540434.1|	525	3e-64	PREDICTED: calcium-binding protein PBP1-like [Glycine max]
Glyma.12G219700.Wm82.a2.v1	22	19	16	35.1992	56	59	46	-1.11736	0.000269135	0.00273105	down	yes	chrChr12:37928088-37929883:-	gi|356542254|ref|XP_003539584.1|	1558	0	PREDICTED: uncharacterized protein LOC100802926 [Glycine max]
Glyma.12G225100.Wm82.a2.v1	36	64	84	106.037	169	108	195	-1.02796	0.000351348	0.00338944	down	yes	chrChr12:38454692-38456172:-	gi|255634094|gb|ACU17410.1|	675	3e-83	unknown [Glycine max]
Glyma.12G237400.Wm82.a2.v1	117	197	173	336.652	564	347	697	-1.4046	1.31402e-08	3.81383e-07	down	yes	chrChr12:39624170-39642049:-	gi|734370834|gb|KHN19450.1|	2552	0	MATE efflux family protein FRD3 [Glycine soja]
Glyma.12G240600.Wm82.a2.v1	73	57	52	219.588	355	434	410	-2.3955	4.88708e-33	9.67039e-31	down	yes	chrChr12:39921997-39925861:+	gi|734370806|gb|KHN19422.1|	2186	0	60S ribosomal protein L3 [Glycine soja]
Glyma.13G003800.Wm82.a2.v1	49	78	70	167.196	228	318	301	-1.78452	2.75072e-15	2.04264e-13	down	yes	chrChr13:1066482-1070077:-	gi|356547535|ref|XP_003542167.1|	4669	0	PREDICTED: uncharacterized protein LOC100787960 [Glycine max]
Glyma.13G009100.Wm82.a2.v1	42	18	37	20.5367	7	8	7	1.64096	1.53111e-05	0.000231171	up	yes	chrChr13:2537087-2538778:-	gi|351726260|ref|NP_001235073.1|	792	8e-103	uncharacterized protein LOC100306440 [Glycine max]
Glyma.13G028100.Wm82.a2.v1	167	283	189	160.689	112	144	53	1.05124	0.000292201	0.00292018	up	yes	chrChr13:7329138-7339205:+	gi|571497433|ref|XP_006593898.1|	5446	0	PREDICTED: TMV resistance protein N-like isoform X1 [Glycine max]
Glyma.13G031600.Wm82.a2.v1	358	289	117	176.386	60	111	96	1.4143	5.18163e-06	8.72833e-05	up	yes	chrChr13:10243883-10250791:+	gi|356547491|ref|XP_003542145.1|	2439	0	PREDICTED: amino acid permease 3 isoform X1 [Glycine max]
Glyma.13G033000.Wm82.a2.v1	91	99	86	70.038	37	71	29	1.01146	0.00060482	0.00535409	up	yes	chrChr13:10491353-10496269:-	gi|351725323|ref|NP_001238112.1|	3641	0	stress-induced receptor-like kinase precursor [Glycine max]
Glyma.13G033400.Wm82.a2.v1	120	102	93	80.3623	45	76	38	1.01914	0.000189297	0.00202602	up	yes	chrChr13:10549359-10553372:-	gi|571497134|ref|XP_006593810.1|	3691	0	PREDICTED: probable receptor-like protein kinase At1g67000-like isoform X1 [Glycine max]
Glyma.13G035900.Wm82.a2.v1	46	26	11	99.0057	198	200	142	-2.09868	2.7044e-11	1.27058e-09	down	yes	chrChr13:11177502-11182100:+	gi|571504404|ref|XP_006595272.1|	3785	0	PREDICTED: uncharacterized protein LOC100784078 [Glycine max]
Glyma.13G036300.Wm82.a2.v1	280	240	319	147.717	0	0	0	5.924	1.05843e-64	5.74265e-62	up	yes	chrChr13:11406312-11416269:+	gi|734384731|gb|KHN24361.1|	2964	0	Proline-rich receptor-like protein kinase PERK8 [Glycine soja]
Glyma.13G040400.Wm82.a2.v1	10	8	4	15.7529	27	29	20	-1.12797	0.00344192	0.0221467	down	yes	chrChr13:12875981-12877773:+	gi|571496986|ref|XP_006593759.1|	1629	0	PREDICTED: ethylene-responsive transcription factor CRF3-like [Glycine max]
Glyma.13G043700.Wm82.a2.v1	56	47	59	40.7285	22	30	26	1.05565	0.000290543	0.00290534	up	yes	chrChr13:13702272-13712017:+	gi|571496933|ref|XP_006593740.1|	1005	7e-132	PREDICTED: uncharacterized aarF domain-containing protein kinase At1g79600, chloroplastic-like isoform X1 [Glycine max]
Glyma.13G043900.Wm82.a2.v1	595	517	749	474.032	312	402	222	1.07864	7.96043e-07	1.61474e-05	up	yes	chrChr13:13723276-13725395:-	gi|356546005|ref|XP_003541423.1|	1447	0	PREDICTED: uncharacterized protein LOC100810770 [Glycine max]
Glyma.13G045700.Wm82.a2.v1	13	10	17	7.35677	0	0	2	1.76357	3.01648e-05	0.00042315	up	yes	chrChr13:13984814-13990272:+	gi|356545795|ref|XP_003541320.1|	2141	0	PREDICTED: mannose-6-phosphate isomerase 1 [Glycine max]
Glyma.13G046100.Wm82.a2.v1	53	32	66	36.5729	33	22	9	1.07512	0.00281052	0.018766	up	yes	chrChr13:14035748-14038145:+	gi|351721841|ref|NP_001237479.1|	820	9e-107	uncharacterized protein LOC100305585 [Glycine max]
Glyma.13G053600.Wm82.a2.v1	21	28	16	14.7039	12	6	3	1.18196	0.00309625	0.0202794	up	yes	chrChr13:15088943-15092606:+	gi|356551038|ref|XP_003543886.1|	4315	0	PREDICTED: receptor-like protein kinase FERONIA-like [Glycine max]
Glyma.13G054400.Wm82.a2.v1	506	505	374	355.521	246	235	234	1.07752	3.08606e-10	1.21134e-08	up	yes	chrChr13:15164832-15168321:-	gi|734331604|gb|KHN07118.1|	4247	0	Receptor-like protein kinase FERONIA [Glycine soja]
Glyma.13G054800.Wm82.a2.v1	990	1386	1531	972.151	485	820	514	1.17817	8.45131e-08	2.07514e-06	up	yes	chrChr13:15215629-15217477:+	gi|351726423|ref|NP_001237126.1|	453	1e-50	uncharacterized protein LOC100305562 precursor [Glycine max]
Glyma.13G056500.Wm82.a2.v1	31	30	33	71.9547	144	109	102	-1.56493	8.88793e-10	3.17053e-08	down	yes	chrChr13:15410233-15411505:-	gi|734331622|gb|KHN07136.1|	577	5e-72	hypothetical protein glysoja_031997 [Glycine soja]
Glyma.13G060200.Wm82.a2.v1	110	112	112	58.7893	0	0	0	4.81168	2.26787e-38	5.44921e-36	up	yes	chrChr13:15749985-15754961:+	gi|356573516|ref|XP_003554904.1|	1016	1e-128	PREDICTED: purple acid phosphatase 23-like isoform X1 [Glycine max]
Glyma.13G068400.Wm82.a2.v1	232	116	146	106.422	50	37	37	1.9034	5.173e-12	2.65266e-10	up	yes	chrChr13:16842894-16857764:-	gi|734352858|gb|KHN13271.1|	426	3e-48	hypothetical protein glysoja_016448 [Glycine soja]
Glyma.13G069800.Wm82.a2.v1	2005	2801	1457	1568.01	1101	1026	858	1.15917	3.00911e-08	8.11085e-07	up	yes	chrChr13:16985150-16988513:-	gi|356550192|ref|XP_003543472.1|	2916	0	PREDICTED: senescence-associated carboxylesterase 101-like [Glycine max]
Glyma.13G075200.Wm82.a2.v1	649	643	578	489.196	358	365	301	1.00746	1.10786e-11	5.46439e-10	up	yes	chrChr13:17816382-17822985:+	gi|593691285|ref|XP_007146212.1|	1376	0	hypothetical protein PHAVU_006G021700g [Phaseolus vulgaris]
Glyma.13G078400.Wm82.a2.v1	15	12	13	8.92283	2	3	7	1.08946	0.00892475	0.0473757	up	yes	chrChr13:18427751-18433749:-	gi|356549331|ref|XP_003543047.1|	2764	0	PREDICTED: chlorophyllide a oxygenase, chloroplastic [Glycine max]
Glyma.13G081100.Wm82.a2.v1	218	169	108	97.9892	16	27	26	2.58273	1.02776e-18	1.03512e-16	up	yes	chrChr13:18881427-18886462:-	gi|571504229|ref|XP_006595231.1|	1202	1e-163	PREDICTED: WAT1-related protein At1g21890-like [Glycine max]
Glyma.13G081700.Wm82.a2.v1	19	27	20	14.8859	9	6	6	1.27472	0.00092937	0.00765127	up	yes	chrChr13:19079739-19081456:-	gi|356550842|ref|XP_003543792.1|	2209	0	PREDICTED: nodulation-signaling pathway 2 protein-like [Glycine max]
Glyma.13G085800.Wm82.a2.v1	79	30	36	34.9464	25	28	7	1.03205	0.00680633	0.0381152	up	yes	chrChr13:19783936-19784699:+	gi|255629990|gb|ACU15347.1|	424	9e-50	unknown [Glycine max]
Glyma.13G089200.Wm82.a2.v1	157	165	73	96.9901	72	50	54	1.159	5.83927e-05	0.000748865	up	yes	chrChr13:20370993-20376851:+	gi|363807588|ref|NP_001242152.1|	3523	0	cryptochrome-1-like [Glycine max]
Glyma.13G092500.Wm82.a2.v1	445	352	404	269.452	103	193	74	1.65784	5.06276e-10	1.90074e-08	up	yes	chrChr13:20719315-20722074:+	gi|571496224|ref|XP_006593555.1|	3737	0	PREDICTED: probable alpha,alpha-trehalose-phosphate synthase [UDP-forming] 11-like [Glycine max]
Glyma.13G092600.Wm82.a2.v1	61	64	63	46.8161	41	31	16	1.06984	0.000484728	0.00444177	up	yes	chrChr13:20724195-20725414:-	gi|734324118|gb|KHN04926.1|	281	4e-27	hypothetical protein glysoja_050133, partial [Glycine soja]
Glyma.13G094500.Wm82.a2.v1	1725	1806	1662	1064.04	345	241	375	2.49858	8.98217e-50	3.02151e-47	up	yes	chrChr13:20961914-20968581:-	gi|571496206|ref|XP_003543749.2|	5713	0	PREDICTED: uncharacterized protein LOC100779077 isoform X1 [Glycine max]
Glyma.13G095000.Wm82.a2.v1	1874	3058	3975	2044.2	484	1760	798	1.10059	0.00650525	0.0368836	up	yes	chrChr13:21005327-21006774:-	gi|363806744|ref|NP_001242530.1|	1425	0	uncharacterized protein LOC100785313 precursor [Glycine max]
Glyma.13G095700.Wm82.a2.v1	263	221	298	148.292	32	24	12	3.28766	2.09344e-36	4.75818e-34	up	yes	chrChr13:21078021-21079169:+	gi|356547332|ref|XP_003542068.1|	616	3e-76	PREDICTED: uncharacterized protein LOC100814899 [Glycine max]
Glyma.13G112400.Wm82.a2.v1	60	31	18	20.9325	5	4	2	2.15959	7.89436e-08	1.94834e-06	up	yes	chrChr13:22577266-22578229:-	gi|571497605|ref|XP_003542371.2|	1189	2e-161	PREDICTED: ethylene-responsive transcription factor ERF017-like [Glycine max]
Glyma.13G113000.Wm82.a2.v1	1186	1477	1049	678.158	48	60	52	4.4395	9.72261e-117	1.25792e-113	up	yes	chrChr13:22663207-22664088:-	gi|356547968|ref|XP_003542376.1|	948	5e-127	PREDICTED: uncharacterized protein LOC100806863 [Glycine max]
Glyma.13G114200.Wm82.a2.v1	16	14	16	28.0702	53	36	39	-1.05854	0.00127441	0.0098574	down	yes	chrChr13:22791534-22798417:+	gi|356545793|ref|XP_003541319.1|	5027	0	PREDICTED: kinesin-like protein NACK2-like isoform X1 [Glycine max]
Glyma.13G115300.Wm82.a2.v1	9	12	11	24.5298	45	41	35	-1.37742	5.73526e-05	0.000737212	down	yes	chrChr13:22882011-22885343:-	gi|571497650|ref|XP_006593974.1|	2660	0	PREDICTED: probable pectinesterase/pectinesterase inhibitor 12-like [Glycine max]
Glyma.13G118900.Wm82.a2.v1	1054	1032	836	601.923	171	182	207	2.45655	9.12574e-52	3.37342e-49	up	yes	chrChr13:23165832-23171431:-	gi|571497724|ref|XP_006594001.1|	6100	0	PREDICTED: ABC transporter B family member 21-like [Glycine max]
Glyma.13G121600.Wm82.a2.v1	194	205	213	332.241	453	511	472	-1.02403	1.69081e-11	8.19557e-10	down	yes	chrChr13:23465944-23468796:+	gi|734429175|gb|KHN44979.1|	607	3e-75	hypothetical protein glysoja_023551 [Glycine soja]
Glyma.13G125900.Wm82.a2.v1	8	7	9	15.7805	31	29	14	-1.00557	0.00955943	0.049941	down	yes	chrChr13:23921173-23923832:+	gi|356548087|ref|XP_003542435.1|	1863	0	PREDICTED: uncharacterized protein LOC100793067 isoform X1 [Glycine max]
Glyma.13G126400.Wm82.a2.v1	397	384	345	660.748	951	1113	894	-1.18239	3.92096e-15	2.86733e-13	down	yes	chrChr13:23974970-23976380:-	gi|351727781|ref|NP_001235125.1|	711	3e-92	uncharacterized protein LOC100306699 [Glycine max]
Glyma.13G129500.Wm82.a2.v1	48	27	52	24.5689	3	7	4	2.33931	6.27333e-10	2.32155e-08	up	yes	chrChr13:24236946-24240144:-	gi|351723581|ref|NP_001236772.1|	479	2e-57	uncharacterized protein LOC100500098 [Glycine max]
Glyma.13G132400.Wm82.a2.v1	904	1246	1077	762.449	439	482	325	1.46712	1.21343e-15	9.31929e-14	up	yes	chrChr13:24467830-24472194:-	gi|734438180|gb|KHN48994.1|	1149	5e-154	Soluble inorganic pyrophosphatase [Glycine soja]
Glyma.13G132500.Wm82.a2.v1	427	436	277	272.369	167	154	138	1.39098	1.26312e-11	6.19389e-10	up	yes	chrChr13:24493948-24498181:+	gi|356548156|ref|XP_003542469.1|	2024	0	PREDICTED: WAT1-related protein At2g37460-like [Glycine max]
Glyma.13G133100.Wm82.a2.v1	269	291	107	154.501	67	108	62	1.40441	4.26259e-06	7.31205e-05	up	yes	chrChr13:24536585-24537523:-	gi|734438186|gb|KHN49000.1|	827	3e-108	Zinc finger protein ZAT11 [Glycine soja]
Glyma.13G133400.Wm82.a2.v1	433	492	496	333.585	150	172	212	1.51082	7.86671e-18	7.33042e-16	up	yes	chrChr13:24565600-24567112:+	gi|734438188|gb|KHN49002.1|	1278	3e-171	hypothetical protein glysoja_025379 [Glycine soja]
Glyma.13G133900.Wm82.a2.v1	109	94	83	187.044	262	309	303	-1.3628	9.19106e-13	5.2138e-11	down	yes	chrChr13:24613843-24616128:+	gi|351721555|ref|NP_001237725.1|	580	2e-72	uncharacterized protein LOC100306624 [Glycine max]
Glyma.13G134300.Wm82.a2.v1	121	86	57	51.0215	15	6	8	2.63003	1.32436e-14	9.22364e-13	up	yes	chrChr13:24664171-24665742:-	gi|356548170|ref|XP_003542476.1|	1582	0	PREDICTED: probable membrane-associated kinase regulator 4-like [Glycine max]
Glyma.13G140000.Wm82.a2.v1	128	95	158	91.9755	53	80	26	1.20145	0.000105654	0.00124661	up	yes	chrChr13:25264544-25265442:-	gi|734436690|gb|KHN48296.1|	268	1e-26	hypothetical protein glysoja_007965 [Glycine soja]
Glyma.13G140100.Wm82.a2.v1	281	272	289	463.805	671	707	641	-1.06011	2.10365e-14	1.4383e-12	down	yes	chrChr13:25272079-25273277:-	gi|356548248|ref|XP_003542515.1|	847	3e-110	PREDICTED: 60S ribosomal protein L12-like [Glycine max]
Glyma.13G149800.Wm82.a2.v1	2682	3295	3208	2363.27	1558	1327	1897	1.07155	2.37987e-11	1.12887e-09	up	yes	chrChr13:26329040-26335075:-	gi|571498317|ref|XP_006594182.1|	2797	0	PREDICTED: pyruvate kinase, cytosolic isozyme-like isoform X1 [Glycine max]
Glyma.13G155400.Wm82.a2.v1	41	39	64	32.5165	23	14	9	1.42814	3.58211e-05	0.000492124	up	yes	chrChr13:27049932-27053688:-	gi|356546098|ref|XP_003541468.1|	3553	0	PREDICTED: two-component response regulator ARR12-like [Glycine max]
Glyma.13G156900.Wm82.a2.v1	842	937	922	661.71	407	351	435	1.31195	1.5201e-20	1.76936e-18	up	yes	chrChr13:27207053-27212234:-	gi|356548467|ref|XP_003542623.1|	3368	0	PREDICTED: uncharacterized protein LOC100802615 [Glycine max]
Glyma.13G157400.Wm82.a2.v1	172	318	190	152.565	71	97	43	1.61719	1.09438e-08	3.21798e-07	up	yes	chrChr13:27241040-27241812:-	gi|356548473|ref|XP_003542626.1|	591	5e-74	PREDICTED: uncharacterized protein LOC100804202 [Glycine max]
Glyma.13G161500.Wm82.a2.v1	103	49	51	48.7574	27	26	30	1.21112	0.00014357	0.00161308	up	yes	chrChr13:27703547-27706641:-	gi|356548518|ref|XP_003542648.1|	1832	0	PREDICTED: ADIPOR-like receptor CG5315-like [Glycine max]
Glyma.13G162600.Wm82.a2.v1	3039	3443	3016	1711.2	84	100	70	5.18544	1.4964e-224	8.38955e-221	up	yes	chrChr13:27790437-27793621:-	gi|356546136|ref|XP_003541487.1|	2390	0	PREDICTED: monogalactosyldiacylglycerol synthase 2, chloroplastic-like [Glycine max]
Glyma.13G165200.Wm82.a2.v1	896	856	812	1377.67	1999	1896	2033	-1.01675	5.38255e-18	5.10038e-16	down	yes	chrChr13:27997373-27999343:+	gi|351721866|ref|NP_001236968.1|	763	5e-99	40S ribosomal protein S11 [Glycine max]
Glyma.13G165300.Wm82.a2.v1	208	155	157	128.133	88	80	66	1.22908	1.92976e-08	5.37823e-07	up	yes	chrChr13:28011615-28015224:+	gi|356548559|ref|XP_003542668.1|	1829	0	PREDICTED: probable protein phosphatase 2C 27-like [Glycine max]
Glyma.13G165700.Wm82.a2.v1	191	204	187	110.87	20	20	14	3.24732	1.45362e-39	3.62209e-37	up	yes	chrChr13:28056810-28059907:+	gi|356546154|ref|XP_003541496.1|	1912	0	PREDICTED: equilibrative nucleotide transporter 8-like [Glycine max]
Glyma.13G166800.Wm82.a2.v1	3598	3940	3767	2161.52	339	445	315	3.40812	4.84357e-106	4.79214e-103	up	yes	chrChr13:28161946-28164623:+	gi|356548579|ref|XP_003542678.1|	1480	0	PREDICTED: SPX domain-containing protein 2-like [Glycine max]
Glyma.13G169900.Wm82.a2.v1	814	663	746	572.959	318	436	406	1.06218	3.93861e-10	1.50729e-08	up	yes	chrChr13:28397652-28401084:+	gi|356548619|ref|XP_003542698.1|	1356	0	PREDICTED: homeobox-leucine zipper protein HAT5-like [Glycine max]
Glyma.13G170300.Wm82.a2.v1	14	15	19	39.8392	71	57	73	-1.60158	1.23649e-07	2.95235e-06	down	yes	chrChr13:28427414-28428731:+	gi|571498688|ref|XP_006594289.1|	865	3e-112	PREDICTED: RING-H2 finger protein ATL48-like [Glycine max]
Glyma.13G171400.Wm82.a2.v1	18	17	6	42.314	106	80	39	-1.71559	2.11748e-06	3.92885e-05	down	yes	chrChr13:28559073-28559703:-	gi|734434021|gb|KHN47194.1|	352	8e-40	hypothetical protein glysoja_022495 [Glycine soja]
Glyma.13G172500.Wm82.a2.v1	36	17	24	16.067	5	0	11	1.39578	0.000791343	0.0066834	up	yes	chrChr13:28644819-28649188:-	gi|356548644|ref|XP_003542710.1|	1850	0	PREDICTED: GDSL esterase/lipase At5g45960-like [Glycine max]
Glyma.13G173100.Wm82.a2.v1	85	73	104	149.578	239	248	175	-1.08036	8.652e-07	1.7407e-05	down	yes	chrChr13:28720656-28721572:+	gi|567179628|ref|XP_006401653.1|	666	6e-84	hypothetical protein EUTSA_v10014731mg [Eutrema salsugineum]
Glyma.13G178700.Wm82.a2.v1	215	256	337	570.086	961	1006	771	-1.50549	1.69348e-15	1.28885e-13	down	yes	chrChr13:29234447-29236610:-	gi|356548709|ref|XP_003542742.1|	694	3e-85	PREDICTED: pistil-specific extensin-like protein-like isoform X1 [Glycine max]
Glyma.13G179200.Wm82.a2.v1	320	232	72	114.452	17	11	1	1.58558	0.00014145	0.00159726	up	yes	chrChr13:29274535-29277271:-	gi|356548715|ref|XP_003542745.1|	1496	0	PREDICTED: uncharacterized protein LOC100779411 [Glycine max]
Glyma.13G188900.Wm82.a2.v1	523	754	358	363.416	213	156	117	1.72543	1.70531e-11	8.25397e-10	up	yes	chrChr13:30244450-30249368:-	gi|571498940|ref|XP_003541567.2|	3387	0	PREDICTED: cysteine-rich receptor-like protein kinase 25-like [Glycine max]
Glyma.13G189000.Wm82.a2.v1	131	120	68	77.1096	42	41	51	1.24842	6.52023e-06	0.000107359	up	yes	chrChr13:30251712-30254986:+	gi|571498942|ref|XP_006594356.1|	3455	0	PREDICTED: cysteine-rich receptor-like protein kinase 10-like [Glycine max]
Glyma.13G189700.Wm82.a2.v1	57	33	194	58.1017	29	17	6	1.14124	0.00673764	0.0378376	up	yes	chrChr13:30310606-30315849:-	gi|358248156|ref|NP_001239827.1|	1996	0	uncharacterized protein LOC100804390 [Glycine max]
Glyma.13G191500.Wm82.a2.v1	31	29	18	45.2064	50	83	68	-1.00836	0.00101195	0.00820264	down	yes	chrChr13:30481955-30482503:+	.	.	.	.
Glyma.13G194000.Wm82.a2.v1	39	38	36	72.0631	109	84	141	-1.23843	2.63429e-06	4.78741e-05	down	yes	chrChr13:30721230-30724571:+	gi|734415285|gb|KHN37697.1|	1379	0	Ribosome-recycling factor [Glycine soja]
Glyma.13G196700.Wm82.a2.v1	19	24	10	11.5139	4	4	6	1.28378	0.0016811	0.0123581	up	yes	chrChr13:31042975-31048036:+	gi|356548869|ref|XP_003542821.1|	3859	0	PREDICTED: phosphatidylinositol 4-phosphate 5-kinase 6-like isoformX1 [Glycine max]
Glyma.13G204600.Wm82.a2.v1	20	14	22	9.86268	0	0	0	2.43409	8.06632e-09	2.4227e-07	up	yes	chrChr13:31868271-31869360:-	gi|734415194|gb|KHN37606.1|	736	2e-95	hypothetical protein glysoja_007309 [Glycine soja]
Glyma.13G204700.Wm82.a2.v1	699	758	621	531.582	421	263	379	1.08338	4.3176e-09	1.36632e-07	up	yes	chrChr13:31872482-31883107:-	gi|356546408|ref|XP_003541618.1|	5679	0	PREDICTED: soluble starch synthase 3, chloroplastic/amyloplastic-like isoform X1 [Glycine max]
Glyma.13G204800.Wm82.a2.v1	273	258	206	149.113	44	36	44	2.54264	3.1084e-31	5.84153e-29	up	yes	chrChr13:31885462-31887911:-	gi|356548957|ref|XP_003542865.1|	1876	0	PREDICTED: ATP synthase gamma chain, chloroplastic-like isoform 3 [Glycine max]
Glyma.13G205200.Wm82.a2.v1	68	51	42	39.8063	13	35	25	1.05532	0.0015621	0.0116591	up	yes	chrChr13:31945041-31945969:+	gi|356548963|ref|XP_003542868.1|	421	5e-48	PREDICTED: uncharacterized protein LOC100799416 [Glycine max]
Glyma.13G207100.Wm82.a2.v1	155	137	50	74.1396	31	38	20	1.68856	5.48708e-07	1.1486e-05	up	yes	chrChr13:32075403-32076489:-	gi|734415172|gb|KHN37584.1|	633	7e-80	hypothetical protein glysoja_007287 [Glycine soja]
Glyma.13G208000.Wm82.a2.v1	163	188	211	143.485	84	111	90	1.07635	1.89367e-07	4.36908e-06	up	yes	chrChr13:32166520-32168409:+	gi|356548993|ref|XP_003542883.1|	2344	0	PREDICTED: basic 7S globulin-like [Glycine max]
Glyma.13G212600.Wm82.a2.v1	35	30	34	58.315	107	75	80	-1.0925	4.0333e-05	0.000544885	down	yes	chrChr13:32619691-32623400:+	gi|571499336|ref|XP_006594452.1|	2677	0	PREDICTED: receptor-like cytosolic serine/threonine-protein kinase RBK2-like isoform X1 [Glycine max]
Glyma.13G215500.Wm82.a2.v1	17	15	24	10.3287	0	0	3	2.03036	1.40478e-06	2.70495e-05	up	yes	chrChr13:32877770-32891187:-	gi|357519951|ref|XP_003630264.1|	1653	0	Callose synthase [Medicago truncatula]
Glyma.13G217500.Wm82.a2.v1	210	225	197	129.534	30	34	53	2.383	2.44772e-24	3.41654e-22	up	yes	chrChr13:33046237-33053366:-	gi|571499572|ref|XP_006594500.1|	2153	0	PREDICTED: phospho-N-acetylmuramoyl-pentapeptide-transferase homolog [Glycine max]
Glyma.13G219100.Wm82.a2.v1	182	168	122	95.9895	56	17	10	2.07843	3.21255e-09	1.04312e-07	up	yes	chrChr13:33234249-33237470:+	gi|351721400|ref|NP_001236696.1|	661	3e-84	uncharacterized protein LOC100500349 [Glycine max]
Glyma.13G219300.Wm82.a2.v1	9	3	0	18.3678	28	18	58	-1.61259	0.000112725	0.00131586	down	yes	chrChr13:33254523-33255542:+	gi|358248910|ref|NP_001239961.1|	1160	3e-157	uncharacterized protein LOC100792379 [Glycine max]
Glyma.13G224400.Wm82.a2.v1	577	769	723	486.785	199	220	366	1.45159	5.61678e-11	2.46984e-09	up	yes	chrChr13:33716071-33719717:+	gi|356546542|ref|XP_003541684.1|	3530	0	PREDICTED: dynamin-related protein 4C-like [Glycine max]
Glyma.13G226600.Wm82.a2.v1	182	154	134	111.978	74	80	33	1.31892	1.77729e-06	3.35501e-05	up	yes	chrChr13:33931952-33932729:-	gi|734434370|gb|KHN47398.1|	480	5e-58	hypothetical protein glysoja_020266 [Glycine soja]
Glyma.13G226700.Wm82.a2.v1	26	28	8	13.0809	11	1	2	1.19839	0.00449731	0.0273968	up	yes	chrChr13:33940170-33941503:+	gi|734434371|gb|KHN47399.1|	1485	0	hypothetical protein glysoja_020267 [Glycine soja]
Glyma.13G232200.Wm82.a2.v1	34	31	28	77.7713	130	111	152	-1.7193	6.72624e-12	3.39226e-10	down	yes	chrChr13:34342771-34347885:+	gi|734337522|gb|KHN08459.1|	1228	2e-166	GDSL esterase/lipase [Glycine soja]
Glyma.13G234900.Wm82.a2.v1	43	49	54	83.2019	128	130	110	-1.0681	3.52789e-06	6.17454e-05	down	yes	chrChr13:34558968-34561668:+	gi|356549282|ref|XP_003543023.1|	1472	0	PREDICTED: tRNA (adenine(58)-N(1))-methyltransferase catalytic subunit trmt61a-like [Glycine max]
Glyma.13G236300.Wm82.a2.v1	23	29	18	41.6937	58	50	80	-1.05691	0.000568931	0.00509674	down	yes	chrChr13:34653364-34655993:+	gi|356549301|ref|XP_003543032.1|	371	3e-41	PREDICTED: uncharacterized protein LOC100797119 isoformX3 [Glycine max]
Glyma.13G238500.Wm82.a2.v1	394	326	160	170.744	42	35	24	2.82373	6.32683e-22	8.00106e-20	up	yes	chrChr13:34884907-34887253:-	gi|734337580|gb|KHN08517.1|	1633	0	hypothetical protein glysoja_014282 [Glycine soja]
Glyma.13G239500.Wm82.a2.v1	273	265	172	179.058	123	125	98	1.11976	3.974e-07	8.58582e-06	up	yes	chrChr13:34986806-34989163:+	gi|356549335|ref|XP_003543049.1|	1174	9e-159	PREDICTED: E3 ubiquitin-protein ligase RMA1H1-like isoform X1 [Glycine max]
Glyma.13G242500.Wm82.a2.v1	1	0	0	7.02891	22	9	13	-1.75592	3.14997e-05	0.000439676	down	yes	chrChr13:35214080-35214492:-	gi|734337616|gb|KHN08553.1|	530	3e-67	hypothetical protein glysoja_014318 [Glycine soja]
Glyma.13G243900.Wm82.a2.v1	78	50	67	49.0812	23	47	24	1.01992	0.00115084	0.00907924	up	yes	chrChr13:35322388-35323950:+	gi|356549387|ref|XP_003543075.1|	1921	0	PREDICTED: kelch-like protein 40b-like [Glycine max]
Glyma.13G245600.Wm82.a2.v1	115	139	62	72.2145	25	51	30	1.44969	4.36024e-06	7.46053e-05	up	yes	chrChr13:35460080-35461356:+	gi|571500328|ref|XP_006594622.1|	1180	3e-159	PREDICTED: uncharacterized protein LOC100794998 [Glycine max]
Glyma.13G248500.Wm82.a2.v1	598	676	498	404.642	223	218	153	1.65491	3.37333e-18	3.28914e-16	up	yes	chrChr13:35658070-35661871:+	gi|571505014|ref|XP_006595417.1|	4423	0	PREDICTED: uncharacterized protein LOC100801910 [Glycine max]
Glyma.13G249400.Wm82.a2.v1	234	248	197	170.632	109	124	94	1.15547	3.59726e-09	1.15576e-07	up	yes	chrChr13:35719291-35721124:+	gi|356546700|ref|XP_003541761.1|	1533	0	PREDICTED: U-box domain-containing protein 8-like [Glycine max]
Glyma.13G249700.Wm82.a2.v1	133	127	187	84.7923	9	16	14	3.16437	4.72528e-28	7.67892e-26	up	yes	chrChr13:35731494-35733559:+	gi|356549433|ref|XP_003543098.1|	873	5e-115	PREDICTED: flavoprotein wrbA-like [Glycine max]
Glyma.13G250900.Wm82.a2.v1	324	397	288	258.98	184	206	131	1.05263	3.52227e-07	7.72397e-06	up	yes	chrChr13:35819604-35821065:+	gi|571500476|ref|XP_003543101.2|	1061	6e-143	PREDICTED: regulator of ribonuclease-like protein 3-like isoform X1 [Glycine max]
Glyma.13G251100.Wm82.a2.v1	74	83	75	130.644	202	172	201	-1.07175	5.29091e-08	1.3545e-06	down	yes	chrChr13:35830329-35836497:+	gi|356546714|ref|XP_003541768.1|	3989	0	PREDICTED: kinesin-1-like [Glycine max]
Glyma.13G253200.Wm82.a2.v1	13	12	12	30.8556	67	50	39	-1.52613	4.80898e-06	8.14549e-05	down	yes	chrChr13:35940032-35943988:+	gi|356546724|ref|XP_003541773.1|	3161	0	PREDICTED: DNA ligase 1-like [Glycine max]
Glyma.13G253700.Wm82.a2.v1	160	170	142	115.566	71	60	77	1.26452	1.70098e-09	5.7973e-08	up	yes	chrChr13:35976217-35983152:-	gi|356546730|ref|XP_003541776.1|	2438	0	PREDICTED: probable sphingolipid transporter spinster homolog 2-like [Glycine max]
Glyma.13G256000.Wm82.a2.v1	502	474	611	396.152	291	238	219	1.20277	3.87676e-12	2.0408e-10	up	yes	chrChr13:36149223-36151914:-	gi|351727695|ref|NP_001235122.1|	576	5e-71	uncharacterized protein LOC100305931 [Glycine max]
Glyma.13G256600.Wm82.a2.v1	10	5	8	18.4371	27	28	37	-1.32917	0.000367747	0.0035244	down	yes	chrChr13:36187051-36191482:+	gi|356546747|ref|XP_003541784.1|	4107	0	PREDICTED: uncharacterized protein At4g38062-like isoform X1 [Glycine max]
Glyma.13G257500.Wm82.a2.v1	744	229	360	288.317	103	124	113	1.82986	8.7752e-10	3.13697e-08	up	yes	chrChr13:36264544-36265333:+	gi|351724663|ref|NP_001238089.1|	763	7e-100	uncharacterized protein LOC100527317 [Glycine max]
Glyma.13G257600.Wm82.a2.v1	330	113	184	135.255	58	51	49	1.8378	1.04602e-09	3.68838e-08	up	yes	chrChr13:36267577-36268273:+	gi|734369044|gb|KHN19008.1|	144	3e-09	hypothetical protein glysoja_029870 [Glycine soja]
Glyma.13G257800.Wm82.a2.v1	251	92	123	101.57	39	43	42	1.75099	1.36342e-08	3.93007e-07	up	yes	chrChr13:36270642-36271624:+	gi|734369042|gb|KHN19006.1|	189	7e-15	hypothetical protein glysoja_029868 [Glycine soja]
Glyma.13G259400.Wm82.a2.v1	850	808	658	573.453	531	379	153	1.12737	8.04191e-05	0.000985148	up	yes	chrChr13:36380971-36382943:-	gi|734434598|gb|KHN47477.1|	1757	0	Gibberellin 2-beta-dioxygenase 1 [Glycine soja]
Glyma.13G262100.Wm82.a2.v1	99	116	124	83.4296	47	60	45	1.21345	2.95262e-07	6.61713e-06	up	yes	chrChr13:36586108-36589827:-	gi|356549584|ref|XP_003543172.1|	2592	0	PREDICTED: 11-oxo-beta-amyrin 30-oxidase-like [Glycine max]
Glyma.13G267800.Wm82.a2.v1	147	158	204	118.639	72	73	41	1.46903	3.15102e-09	1.02677e-07	up	yes	chrChr13:37045644-37046695:+	gi|571496006|ref|XP_006593481.1|	468	7e-52	PREDICTED: gamma-glutamyl hydrolase isoform X1 [Glycine max]
Glyma.13G271300.Wm82.a2.v1	22	5	11	7.48519	2	1	2	1.37307	0.00115972	0.00913243	up	yes	chrChr13:37333350-37335248:-	gi|734413430|gb|KHN36875.1|	2891	0	ABC transporter G family member 10 [Glycine soja]
Glyma.13G275500.Wm82.a2.v1	437	383	430	270.746	145	79	101	1.97955	2.32693e-21	2.87778e-19	up	yes	chrChr13:37700569-37704898:+	gi|356546864|ref|XP_003541842.1|	2365	0	PREDICTED: MATE efflux family protein LAL5-like isoform X1 [Glycine max]
Glyma.13G281600.Wm82.a2.v1	13	10	17	25.1491	46	34	36	-1.07974	0.00155683	0.0116301	down	yes	chrChr13:38297090-38299107:+	gi|356546898|ref|XP_003541858.1|	1670	0	PREDICTED: uncharacterized protein LOC100818795 isoform X1 [Glycine max]
Glyma.13G283000.Wm82.a2.v1	964	742	719	625.097	342	526	397	1.04642	8.10768e-08	1.99805e-06	up	yes	chrChr13:38445487-38448349:+	gi|734413321|gb|KHN36766.1|	3107	0	G-type lectin S-receptor-like serine/threonine-protein kinase SD1-1 [Glycine soja]
Glyma.13G283700.Wm82.a2.v1	10	15	10	7.5639	3	4	2	1.14717	0.00629619	0.0359222	up	yes	chrChr13:38487889-38489008:+	gi|593698378|ref|XP_007149662.1|	1027	3e-129	hypothetical protein PHAVU_005G088700g [Phaseolus vulgaris]
Glyma.13G285400.Wm82.a2.v1	1300	1450	1621	1017.05	749	540	300	1.48701	7.7921e-10	2.81848e-08	up	yes	chrChr13:38624145-38627680:-	gi|356549809|ref|XP_003543283.1|	3122	0	PREDICTED: chitin-inducible gibberellin-responsive protein 1-like [Glycine max]
Glyma.13G286300.Wm82.a2.v1	70	56	73	115.877	222	172	124	-1.09259	9.50106e-06	0.0001514	down	yes	chrChr13:38695509-38699681:+	gi|734413293|gb|KHN36738.1|	1034	7e-129	21.7 kDa class VI heat shock protein [Glycine soja]
Glyma.13G289100.Wm82.a2.v1	176	198	134	119.702	72	64	58	1.4409	1.42743e-10	5.84863e-09	up	yes	chrChr13:38944160-38946188:-	gi|356549843|ref|XP_003543300.1|	2282	0	PREDICTED: anthocyanidin 3-O-glucoside 2''-O-glucosyltransferase-like [Glycine max]
Glyma.13G289200.Wm82.a2.v1	428	400	350	261.379	137	92	117	1.83879	1.70149e-22	2.21847e-20	up	yes	chrChr13:38949725-38951429:-	gi|734413266|gb|KHN36711.1|	1539	0	UDP-glycosyltransferase 79B6 [Glycine soja]
Glyma.13G291000.Wm82.a2.v1	532	491	439	284.934	48	70	58	3.04199	2.94638e-55	1.17992e-52	up	yes	chrChr13:39127484-39132434:+	gi|356546960|ref|XP_003541887.1|	1868	0	PREDICTED: pseudouridine-5'-monophosphatase-like [Glycine max]
Glyma.13G293500.Wm82.a2.v1	686	873	978	1377.57	1510	2108	2332	-1.0029	1.75596e-07	4.08215e-06	down	yes	chrChr13:39318403-39319927:+	gi|734413228|gb|KHN36673.1|	1159	2e-154	Fasciclin-like arabinogalactan protein 6 [Glycine soja]
Glyma.13G294000.Wm82.a2.v1	110	170	177	97.6895	54	38	19	1.8934	1.64677e-10	6.68222e-09	up	yes	chrChr13:39352609-39355045:-	gi|571501667|ref|XP_006594832.1|	1412	0	PREDICTED: NAC domain-containing protein 8-like [Glycine max]
Glyma.13G296200.Wm82.a2.v1	9	10	13	25.3501	35	50	41	-1.41655	4.02018e-05	0.00054333	down	yes	chrChr13:39540769-39543711:+	gi|356547001|ref|XP_003541907.1|	3252	0	PREDICTED: probable L-type lectin-domain containing receptor kinase VII.2-like [Glycine max]
Glyma.13G297400.Wm82.a2.v1	712	633	610	462.653	277	289	192	1.46499	5.28251e-16	4.191e-14	up	yes	chrChr13:39623739-39624856:+	gi|356549918|ref|XP_003543337.1|	120	7e-06	PREDICTED: uncharacterized protein LOC100500586 [Glycine max]
Glyma.13G298000.Wm82.a2.v1	969	940	1035	640.076	285	262	233	2.02789	1.9426e-46	5.7322e-44	up	yes	chrChr13:39657343-39660414:-	gi|734413185|gb|KHN36630.1|	2597	0	hypothetical protein glysoja_001361 [Glycine soja]
Glyma.13G298400.Wm82.a2.v1	2795	2983	2543	1818.4	640	827	795	1.98461	3.69172e-41	9.70201e-39	up	yes	chrChr13:39684841-39687061:-	gi|356549924|ref|XP_003543340.1|	1484	0	PREDICTED: bifunctional epoxide hydrolase 2-like isoform X1 [Glycine max]
Glyma.13G300800.Wm82.a2.v1	18	20	18	34.6731	60	41	58	-1.11665	0.000319802	0.00314097	down	yes	chrChr13:39859041-39861201:+	.	.	.	.
Glyma.13G315300.Wm82.a2.v1	24	50	19	19.4763	6	9	5	1.61157	3.85829e-05	0.000523955	up	yes	chrChr13:41041851-41044605:-	gi|356550097|ref|XP_003543426.1|	1211	2e-162	PREDICTED: NAC domain-containing protein 90-like isoform X1 [Glycine max]
Glyma.13G319500.Wm82.a2.v1	322	311	269	500.887	671	608	910	-1.05344	7.01769e-09	2.1325e-07	down	yes	chrChr13:41389443-41390877:+	gi|734376895|gb|KHN21458.1|	627	2e-77	Histone deacetylase HDT1 [Glycine soja]
Glyma.13G320600.Wm82.a2.v1	176	91	115	90.3107	42	46	59	1.36281	7.23741e-07	1.4827e-05	up	yes	chrChr13:41494194-41497018:+	gi|356565725|ref|XP_003551088.1|	1562	0	PREDICTED: GDSL esterase/lipase At5g22810-like [Glycine max]
Glyma.13G322600.Wm82.a2.v1	103	78	61	136.754	229	167	207	-1.05083	5.10472e-06	8.61171e-05	down	yes	chrChr13:41709896-41713941:+	gi|356550144|ref|XP_003543449.1|	2574	0	PREDICTED: serine carboxypeptidase-like 48-like [Glycine max]
Glyma.13G323800.Wm82.a2.v1	1	2	1	17.1737	15	45	45	-2.37415	9.44183e-09	2.79836e-07	down	yes	chrChr13:41826206-41828824:-	gi|351721519|ref|NP_001236444.1|	2623	0	NRT2 protein [Glycine max]
Glyma.13G324700.Wm82.a2.v1	5	9	19	26.6086	40	51	42	-1.37902	0.000149726	0.00167108	down	yes	chrChr13:41978496-41983456:+	gi|356550198|ref|XP_003543475.1|	995	2e-131	PREDICTED: cytokinin riboside 5'-monophosphate phosphoribohydrolase LOG1-like [Glycine max]
Glyma.13G326400.Wm82.a2.v1	2433	2533	2761	1854.73	1091	1062	1013	1.42989	9.35067e-34	1.89486e-31	up	yes	chrChr13:42138505-42144566:-	gi|356550161|ref|XP_003543457.1|	3851	0	PREDICTED: 4-hydroxy-3-methylbut-2-en-1-yl diphosphate synthase, chloroplastic-like [Glycine max]
Glyma.13G329900.Wm82.a2.v1	482	376	274	240.366	74	102	86	2.09722	7.95747e-20	8.77644e-18	up	yes	chrChr13:42453515-42454035:+	gi|734397474|gb|KHN30229.1|	302	9e-33	hypothetical protein glysoja_010607 [Glycine soja]
Glyma.13G333100.Wm82.a2.v1	40	45	113	239.385	584	315	413	-2.16833	6.06707e-13	3.51274e-11	down	yes	chrChr13:42710256-42711669:+	gi|734397445|gb|KHN30200.1|	1271	1e-173	Aquaporin TIP1-3 [Glycine soja]
Glyma.13G335100.Wm82.a2.v1	341	305	239	203.744	74	129	103	1.56682	6.37366e-12	3.23603e-10	up	yes	chrChr13:42858772-42860629:+	gi|356547243|ref|XP_003542025.1|	1579	0	PREDICTED: uncharacterized protein LOC100787251 [Glycine max]
Glyma.13G335900.Wm82.a2.v1	53	69	40	36.63	17	18	17	1.49982	2.18644e-06	4.04118e-05	up	yes	chrChr13:42931478-42936619:+	gi|571502857|ref|XP_006595021.1|	3900	0	PREDICTED: uncharacterized protein LOC100788333 isoform X2 [Glycine max]
Glyma.13G337100.Wm82.a2.v1	13	8	4	18.0012	23	16	48	-1.05672	0.00846933	0.0454748	down	yes	chrChr13:43015150-43024713:+	gi|571502902|ref|XP_006595029.1|	3619	0	PREDICTED: telomere repeat-binding protein 5-like isoform X1 [Glycine max]
Glyma.13G342000.Wm82.a2.v1	75	54	72	126.606	184	249	150	-1.24058	3.40282e-07	7.49133e-06	down	yes	chrChr13:43366276-43366808:+	gi|590583591|ref|XP_007014942.1|	718	4e-94	Histone superfamily protein [Theobroma cacao]
Glyma.13G342700.Wm82.a2.v1	25	15	16	12.6936	3	11	4	1.12184	0.00597214	0.0345141	up	yes	chrChr13:43419189-43422436:-	gi|356550354|ref|XP_003543552.1|	3858	0	PREDICTED: multiple C2 and transmembrane domain-containing protein 2-like isoform X1 [Glycine max]
Glyma.13G347500.Wm82.a2.v1	19	12	7	29.4697	60	35	51	-1.36444	0.000106512	0.00125498	down	yes	chrChr13:43761727-43766023:+	gi|388461364|gb|AFK32352.1|	4546	0	lipoxygenase-2 [Glycine max]
Glyma.13G349200.Wm82.a2.v1	490	666	648	462.391	309	300	319	1.08614	2.82917e-11	1.3255e-09	up	yes	chrChr13:43896860-43900894:+	gi|734397299|gb|KHN30054.1|	1125	2e-147	Nucleosome assembly protein 1-like 1 [Glycine soja]
Glyma.13G351600.Wm82.a2.v1	15	12	17	8.36469	4	0	0	1.61019	0.000139796	0.00158232	up	yes	chrChr13:44074143-44076586:-	gi|363814386|ref|NP_001242832.1|	1482	0	uncharacterized protein LOC100789743 [Glycine max]
Glyma.13G352100.Wm82.a2.v1	326	317	348	572.135	820	875	849	-1.15829	4.74483e-18	4.53441e-16	down	yes	chrChr13:44108846-44112395:+	gi|255628055|gb|ACU14372.1|	907	2e-121	unknown [Glycine max]
Glyma.13G352300.Wm82.a2.v1	83	76	60	46.3816	14	20	16	1.95843	5.09365e-11	2.25454e-09	up	yes	chrChr13:44119294-44120791:-	gi|571503408|ref|XP_006595102.1|	859	9e-112	PREDICTED: agglutinin [Glycine max]
Glyma.13G360000.Wm82.a2.v1	28	24	14	13.3359	4	0	7	1.56696	0.000160972	0.00177423	up	yes	chrChr13:44696143-44701512:-	gi|356550553|ref|XP_003543650.1|	3270	0	PREDICTED: probable sulfate transporter 3.4-like [Glycine max]
Glyma.13G361200.Wm82.a2.v1	492	382	420	332.182	268	234	166	1.06145	8.54676e-08	2.09399e-06	up	yes	chrChr13:44823128-44824990:+	gi|351726144|ref|NP_001235069.1|	972	1e-127	uncharacterized protein LOC100500488 [Glycine max]
Glyma.13G365300.Wm82.a2.v1	22	18	8	9.70478	2	2	4	1.47934	0.000413357	0.00388279	up	yes	chrChr13:45146165-45148920:+	gi|356550612|ref|XP_003543679.1|	1152	7e-151	PREDICTED: uncharacterized protein LOC100785496 [Glycine max]
Glyma.13G368700.Wm82.a2.v1	44	45	36	70.7515	116	118	78	-1.026	7.87628e-05	0.000967678	down	yes	chrChr13:45427367-45431745:+	gi|571503920|ref|XP_006595181.1|	1418	0	PREDICTED: transcription factor bHLH25-like [Glycine max]
Glyma.13G371200.Wm82.a2.v1	82	60	79	124.123	172	184	189	-1.05692	3.89424e-07	8.44606e-06	down	yes	chrChr13:45636052-45639690:-	gi|571504028|ref|XP_006595193.1|	4599	0	PREDICTED: putative leucine-rich repeat receptor-like serine/threonine-protein kinase At2g24130-like isoform X1 [Glycine max]
Glyma.14G000700.Wm82.a2.v1	75	67	105	142.945	203	247	186	-1.10196	9.56325e-07	1.91373e-05	down	yes	chrChr14:102540-103424:+	gi|571505877|ref|XP_006595631.1|	471	4e-56	PREDICTED: uncharacterized protein LOC100527577 [Glycine max]
Glyma.14G001600.Wm82.a2.v1	3055	3531	2900	2407.8	1521	1884	1317	1.13164	3.00131e-12	1.60256e-10	up	yes	chrChr14:202374-204618:-	gi|571512397|ref|XP_006596576.1|	2582	0	PREDICTED: protein NLP2-like [Glycine max]
Glyma.14G003600.Wm82.a2.v1	37	25	36	55.7052	86	88	72	-1.02252	0.000146032	0.00163473	down	yes	chrChr14:326635-334399:+	gi|571505989|ref|XP_006595648.1|	6266	0	PREDICTED: uncharacterized protein LOC100799788 isoform X2 [Glycine max]
Glyma.14G003700.Wm82.a2.v1	58	44	45	87.9601	122	133	142	-1.15888	5.1878e-07	1.08976e-05	down	yes	chrChr14:335301-338695:+	gi|356553528|ref|XP_003545107.1|	3272	0	PREDICTED: E3 ubiquitin-protein ligase ORTHRUS 2-like [Glycine max]
Glyma.14G004800.Wm82.a2.v1	11	6	20	26.2113	45	50	31	-1.1948	0.00104999	0.00846004	down	yes	chrChr14:399800-400274:+	gi|356554489|ref|XP_003545578.1|	343	3e-39	PREDICTED: uncharacterized protein LOC100807423 [Glycine max]
Glyma.14G006400.Wm82.a2.v1	180	166	150	273.833	397	320	477	-1.03599	5.60498e-08	1.42838e-06	down	yes	chrChr14:506220-512622:-	gi|571506098|ref|XP_006595660.1|	1905	0	PREDICTED: heterogeneous nuclear ribonucleoprotein 1-like [Glycine max]
Glyma.14G008000.Wm82.a2.v1	356	240	172	197.01	152	149	94	1.01099	0.000111381	0.00130367	up	yes	chrChr14:616217-618007:-	gi|359806053|ref|NP_001241179.1|	1398	0	uncharacterized protein LOC100815789 [Glycine max]
Glyma.14G013700.Wm82.a2.v1	368	420	376	262.897	149	107	116	1.73338	2.45645e-22	3.17818e-20	up	yes	chrChr14:1018079-1019337:-	gi|356552589|ref|XP_003544648.1|	1011	5e-134	PREDICTED: protein TIC 20-v, chloroplastic-like [Glycine max]
Glyma.14G014300.Wm82.a2.v1	122	125	98	193.005	243	255	348	-1.05081	4.01978e-07	8.67916e-06	down	yes	chrChr14:1045063-1049214:+	gi|356552618|ref|XP_003544661.1|	1669	0	PREDICTED: mitochondrial import inner membrane translocase subunit TIM50-like [Glycine max]
Glyma.14G017000.Wm82.a2.v1	130	151	110	94.7066	73	55	38	1.26499	7.51182e-07	1.53611e-05	up	yes	chrChr14:1218416-1221786:-	gi|356552737|ref|XP_003544719.1|	1611	0	PREDICTED: pirin-like protein-like [Glycine max]
Glyma.14G021600.Wm82.a2.v1	686	692	784	552.305	370	374	355	1.11664	4.06049e-16	3.27556e-14	up	yes	chrChr14:1528273-1530313:-	gi|356552945|ref|XP_003544820.1|	1816	0	PREDICTED: ribonuclease 3-like protein 2-like [Glycine max]
Glyma.14G027400.Wm82.a2.v1	156	119	91	92.6866	83	53	45	1.0488	0.000126906	0.00145899	up	yes	chrChr14:1980146-1986546:-	gi|356553593|ref|XP_003545139.1|	2649	0	PREDICTED: probable galacturonosyltransferase 15-like [Glycine max]
Glyma.14G034000.Wm82.a2.v1	4	14	4	16.9838	29	24	31	-1.19037	0.00246439	0.0168632	down	yes	chrChr14:2482399-2484675:-	gi|356554118|ref|XP_003545396.1|	720	1e-91	PREDICTED: uncharacterized protein LOC100798738 isoform X1 [Glycine max]
Glyma.14G041500.Wm82.a2.v1	6345	5851	5921	4428.94	3015	2198	2727	1.32438	6.8836e-21	8.3294e-19	up	yes	chrChr14:3127834-3131281:+	gi|356554294|ref|XP_003545483.1|	3183	0	PREDICTED: protein ETHYLENE INSENSITIVE 3 [Glycine max]
Glyma.14G041700.Wm82.a2.v1	812	1337	985	787.449	464	547	500	1.15837	6.8796e-10	2.52921e-08	up	yes	chrChr14:3150091-3152649:+	gi|356554299|ref|XP_003545485.1|	997	5e-131	PREDICTED: uncharacterized protein LOC100800674 isoform 1 [Glycine max]
Glyma.14G045000.Wm82.a2.v1	93	134	117	191.366	299	226	313	-1.04218	4.0523e-07	8.73817e-06	down	yes	chrChr14:3430845-3435477:-	gi|356554427|ref|XP_003545548.1|	3038	0	PREDICTED: lysosomal beta glucosidase-like [Glycine max]
Glyma.14G048500.Wm82.a2.v1	4	4	2	10.6637	20	17	20	-1.41707	0.000522778	0.00473116	down	yes	chrChr14:3777252-3778553:-	gi|571441905|ref|XP_003518448.2|	353	5e-60	PREDICTED: TMV resistance protein N-like [Glycine max]
Glyma.14G049600.Wm82.a2.v1	506	571	581	396.944	239	241	193	1.41863	3.19088e-19	3.38605e-17	up	yes	chrChr14:3845462-3852112:-	gi|356553721|ref|XP_003545201.1|	988	5e-130	PREDICTED: probable tyrosine-protein phosphatase At1g05000-like isoform X1 [Glycine max]
Glyma.14G051600.Wm82.a2.v1	6	15	3	23.5842	50	49	25	-1.50514	0.000109584	0.00128577	down	yes	chrChr14:4049732-4050958:-	gi|734428431|gb|KHN44736.1|	606	4e-77	hypothetical protein glysoja_032075 [Glycine soja]
Glyma.14G053600.Wm82.a2.v1	356	233	383	227.571	145	125	91	1.47175	1.95827e-10	7.82354e-09	up	yes	chrChr14:4232596-4235183:-	gi|571507348|ref|XP_006595847.1|	1724	0	PREDICTED: peroxidase 4-like [Glycine max]
Glyma.14G061100.Wm82.a2.v1	2258	2173	1850	3496.02	4961	4778	5556	-1.08381	4.61809e-16	3.68123e-14	down	yes	chrChr14:4945081-4947416:+	gi|358248740|ref|NP_001239676.1|	1461	0	uncharacterized protein LOC100777482 [Glycine max]
Glyma.14G061200.Wm82.a2.v1	156	164	79	83.6681	31	31	24	2.04914	2.36317e-12	1.28217e-10	up	yes	chrChr14:4954181-4955914:+	gi|571507539|ref|XP_003545237.2|	2523	0	PREDICTED: nematode resistance protein-like HSPRO2-like [Glycine max]
Glyma.14G064900.Wm82.a2.v1	3474	3917	3695	2706.81	1581	1471	1785	1.3364	6.86977e-26	1.04567e-23	up	yes	chrChr14:5330239-5334706:+	gi|356551602|ref|XP_003544163.1|	1674	0	PREDICTED: mitochondrial substrate carrier family protein V-like isoform X1 [Glycine max]
Glyma.14G065700.Wm82.a2.v1	55	57	55	94.0966	122	107	185	-1.02476	5.10629e-05	0.000669659	down	yes	chrChr14:5397906-5399343:-	gi|359807570|ref|NP_001240899.1|	1313	2e-179	uncharacterized protein LOC100818815 [Glycine max]
Glyma.14G065900.Wm82.a2.v1	1757	1546	1554	1190.57	747	674	726	1.31896	2.89066e-25	4.26486e-23	up	yes	chrChr14:5409876-5413105:-	gi|574584389|ref|NP_001276240.1|	1791	0	mannose-1-phosphate guanylyltransferase 1-like [Glycine max]
Glyma.14G067200.Wm82.a2.v1	140	49	93	58.3391	16	28	11	1.96062	2.09901e-08	5.80184e-07	up	yes	chrChr14:5567990-5570401:+	gi|571507744|ref|XP_006595899.1|	2339	0	PREDICTED: glycerol-3-phosphate acyltransferase 5-like [Glycine max]
Glyma.14G070400.Wm82.a2.v1	25	27	31	17.892	7	9	5	1.55961	2.98543e-05	0.000419144	up	yes	chrChr14:5910263-5911496:-	gi|356551851|ref|XP_003544286.1|	1136	4e-153	PREDICTED: uncharacterized protein LOC100813665 isoform X1 [Glycine max]
Glyma.14G071400.Wm82.a2.v1	2455	1962	1717	1398.09	783	609	644	1.69092	1.68661e-23	2.26944e-21	up	yes	chrChr14:5992881-5994613:-	gi|356551950|ref|XP_003544335.1|	630	1e-75	PREDICTED: ocs element-binding factor 1 [Glycine max]
Glyma.14G074700.Wm82.a2.v1	395	405	241	263.702	175	158	182	1.10652	2.00004e-07	4.60188e-06	up	yes	chrChr14:6256792-6262154:+	gi|356552103|ref|XP_003544410.1|	3978	0	PREDICTED: probable LRR receptor-like serine/threonine-protein kinase At2g16250-like [Glycine max]
Glyma.14G080200.Wm82.a2.v1	323	266	293	218.299	153	179	71	1.16288	8.31084e-06	0.000133957	up	yes	chrChr14:6917868-6919507:-	gi|734432374|gb|KHN46297.1|	1078	5e-141	hypothetical protein glysoja_045308 [Glycine soja]
Glyma.14G080800.Wm82.a2.v1	1407	1420	1514	941.457	381	368	386	2.06098	1.76567e-62	8.7346e-60	up	yes	chrChr14:6992996-7004070:+	gi|356552184|ref|XP_003544449.1|	5115	0	PREDICTED: uncharacterized protein LOC100820584 isoform X1 [Glycine max]
Glyma.14G081100.Wm82.a2.v1	625	722	1591	747.474	665	413	400	1.01858	0.000282371	0.00283712	up	yes	chrChr14:7019928-7028736:-	gi|356553927|ref|XP_003545302.1|	6074	0	PREDICTED: uncharacterized protein LOC100775692 isoform X1 [Glycine max]
Glyma.14G081200.Wm82.a2.v1	133	81	276	101.551	55	32	11	1.33516	0.00150959	0.0113548	up	yes	chrChr14:7032608-7036117:+	gi|356552192|ref|XP_003544453.1|	2094	0	PREDICTED: patatin-05 [Glycine max]
Glyma.14G082100.Wm82.a2.v1	33	40	46	71.419	109	110	104	-1.15374	1.98078e-06	3.71e-05	down	yes	chrChr14:7092487-7095535:+	gi|356552198|ref|XP_003544456.1|	1810	0	PREDICTED: origin recognition complex subunit 2-like isoform 1 [Glycine max]
Glyma.14G086500.Wm82.a2.v1	565	508	508	353.801	140	221	121	1.75442	2.03555e-16	1.70758e-14	up	yes	chrChr14:7741853-7743167:+	gi|351721069|ref|NP_001237709.1|	1343	0	MYB transcription factor MYB81 [Glycine max]
Glyma.14G087600.Wm82.a2.v1	2229	2273	2489	1546.94	701	689	635	1.9176	1.09406e-55	4.46161e-53	up	yes	chrChr14:7850409-7854715:-	gi|363814555|ref|NP_001242753.1|	1949	0	uncharacterized protein LOC100794328 [Glycine max]
Glyma.14G088300.Wm82.a2.v1	424	387	389	280.711	206	181	58	1.37794	2.8308e-06	5.06248e-05	up	yes	chrChr14:7921322-7922418:-	gi|390517035|ref|NP_001254622.1|	966	8e-128	zinc finger protein ZAT10-like [Glycine max]
Glyma.14G089800.Wm82.a2.v1	545	158	268	237.064	140	117	164	1.16515	0.000145081	0.00162571	up	yes	chrChr14:8169038-8171166:+	gi|255646086|gb|ACU23530.1|	364	2e-35	unknown [Glycine max]
Glyma.14G090300.Wm82.a2.v1	9	16	6	19.8282	30	29	33	-1.03652	0.00490534	0.0294347	down	yes	chrChr14:8223688-8226300:-	gi|356552290|ref|XP_003544501.1|	1097	7e-148	PREDICTED: uncharacterized protein LOC100803511 isoformX1 [Glycine max]
Glyma.14G094500.Wm82.a2.v1	11	8	12	21.9921	47	31	28	-1.21291	0.00074055	0.00632749	down	yes	chrChr14:8788109-8793948:-	gi|356552350|ref|XP_003544531.1|	3646	0	PREDICTED: protein CHUP1, chloroplastic-like [Glycine max]
Glyma.14G095400.Wm82.a2.v1	486	399	399	279.879	105	110	129	1.97429	2.45837e-28	4.01442e-26	up	yes	chrChr14:8877839-8880050:-	gi|356552360|ref|XP_003544536.1|	2039	0	PREDICTED: delta(8)-fatty-acid desaturase-like [Glycine max]
Glyma.14G098200.Wm82.a2.v1	475	308	289	228.968	69	131	56	1.96018	1.53763e-12	8.5073e-11	up	yes	chrChr14:9296701-9299603:+	gi|351724497|ref|NP_001235268.1|	845	4e-105	uncharacterized protein LOC100499733 [Glycine max]
Glyma.14G113400.Wm82.a2.v1	172	147	135	102.761	50	54	42	1.66702	1.78952e-13	1.10455e-11	up	yes	chrChr14:13365240-13366605:+	gi|356552500|ref|XP_003544605.1|	739	4e-93	PREDICTED: uncharacterized protein LOC100814735 [Glycine max]
Glyma.14G115000.Wm82.a2.v1	107	99	83	71.0112	56	45	28	1.18144	1.26164e-05	0.000194502	up	yes	chrChr14:13652477-13655648:-	gi|571470705|ref|XP_006585092.1|	247	3e-34	PREDICTED: cell wall protein AWA1-like [Glycine max]
Glyma.14G115500.Wm82.a2.v1	2	1	1	6.66898	5	18	15	-1.29889	0.00209305	0.0147885	down	yes	chrChr14:13756259-13757317:+	gi|734406253|gb|KHN33896.1|	474	2e-55	14 kDa proline-rich protein DC2.15 [Glycine soja]
Glyma.14G116400.Wm82.a2.v1	18	41	24	18.7872	17	8	2	1.13404	0.00522154	0.0309238	up	yes	chrChr14:14139659-14143237:-	gi|356554266|ref|XP_003545469.1|	2951	0	PREDICTED: uncharacterized protein LOC100787458 [Glycine max]
Glyma.14G118800.Wm82.a2.v1	32	41	43	26.1815	17	13	7	1.41881	4.63049e-05	0.00061349	up	yes	chrChr14:16247988-16257186:+	gi|734341778|gb|KHN09867.1|	3372	0	Putative receptor-like protein kinase [Glycine soja]
Glyma.14G131400.Wm82.a2.v1	68	66	73	44.0916	19	18	12	1.92027	9.11608e-11	3.85246e-09	up	yes	chrChr14:22505022-22506112:+	gi|734362182|gb|KHN16003.1|	471	3e-55	hypothetical protein glysoja_043174 [Glycine soja]
Glyma.14G133100.Wm82.a2.v1	28	33	39	58.0823	82	84	93	-1.07416	3.57455e-05	0.000491394	down	yes	chrChr14:22947797-22950206:+	gi|363808226|ref|NP_001242745.1|	582	2e-71	uncharacterized protein LOC100788694 [Glycine max]
Glyma.14G139200.Wm82.a2.v1	89	35	54	34.5073	7	5	8	2.43251	3.14645e-11	1.45289e-09	up	yes	chrChr14:26626424-26628006:+	gi|571513425|ref|XP_006596849.1|	511	2e-77	PREDICTED: uncharacterized protein LOC102669243 [Glycine max]
Glyma.14G141200.Wm82.a2.v1	16	13	19	31.8969	51	54	45	-1.22122	0.000112318	0.0013128	down	yes	chrChr14:27847302-27853774:-	gi|356552624|ref|XP_003544664.1|	2333	0	PREDICTED: indole-3-pyruvate monooxygenase YUCCA6-like [Glycine max]
Glyma.14G141700.Wm82.a2.v1	38	29	41	19.9466	5	0	1	2.62976	4.24921e-11	1.90079e-09	up	yes	chrChr14:28560446-28563467:-	gi|571509773|ref|XP_006596170.1|	778	2e-98	PREDICTED: forkhead box protein J3-like [Glycine max]
Glyma.14G141800.Wm82.a2.v1	106	92	86	66.1218	30	42	31	1.46253	1.49443e-08	4.26388e-07	up	yes	chrChr14:28563644-28568466:+	gi|356554513|ref|XP_003545590.1|	3361	0	PREDICTED: pentatricopeptide repeat-containing protein At5g25630-like isoform X1 [Glycine max]
Glyma.14G148100.Wm82.a2.v1	351	361	209	178.105	18	41	43	2.91374	2.3202e-25	3.45351e-23	up	yes	chrChr14:31854934-31861210:+	gi|356552656|ref|XP_003544679.1|	1982	0	PREDICTED: WAT1-related protein At4g08290-like [Glycine max]
Glyma.14G148300.Wm82.a2.v1	817	747	388	464.125	248	319	203	1.36663	4.42629e-08	1.16325e-06	up	yes	chrChr14:31907047-31912155:+	gi|356552660|ref|XP_003544681.1|	1985	0	PREDICTED: WAT1-related protein At1g44800-like [Glycine max]
Glyma.14G150100.Wm82.a2.v1	112	127	141	81.5796	32	46	16	1.88421	7.95105e-11	3.4072e-09	up	yes	chrChr14:32376200-32378594:-	gi|571510001|ref|XP_003544687.2|	2271	0	PREDICTED: esterase-like [Glycine max]
Glyma.14G151600.Wm82.a2.v1	302	330	373	258.351	173	217	131	1.04909	2.62507e-07	5.93844e-06	up	yes	chrChr14:32845192-32851088:+	gi|356552691|ref|XP_003544696.1|	1720	0	PREDICTED: WAT1-related protein At4g08290-like [Glycine max]
Glyma.14G156300.Wm82.a2.v1	67	107	72	58.2041	10	65	20	1.10722	0.00341193	0.0219986	up	yes	chrChr14:34086439-34087939:+	gi|351727292|ref|NP_001236132.1|	674	5e-83	uncharacterized protein LOC100500561 [Glycine max]
Glyma.14G162100.Wm82.a2.v1	92	96	69	155.435	240	132	334	-1.12488	5.43674e-05	0.000705309	down	yes	chrChr14:38859814-38863074:+	gi|571510541|ref|XP_006596297.1|	1651	0	PREDICTED: probable protein phosphatase 2C 51-like [Glycine max]
Glyma.14G163900.Wm82.a2.v1	7	7	7	14.6307	23	18	29	-1.09417	0.00449306	0.0273808	down	yes	chrChr14:40415756-40423500:+	gi|571510589|ref|XP_006596302.1|	2862	0	PREDICTED: uncharacterized protein At1g04910-like [Glycine max]
Glyma.14G167800.Wm82.a2.v1	28	7	24	12.5939	4	4	6	1.31502	0.00149124	0.0112526	up	yes	chrChr14:41626378-41626943:+	gi|734323037|gb|KHN04690.1|	388	2e-45	hypothetical protein glysoja_040012 [Glycine soja]
Glyma.14G181800.Wm82.a2.v1	39	40	37	65.5046	122	82	85	-1.02177	8.56167e-05	0.00104011	down	yes	chrChr14:44467997-44476613:+	gi|571511135|ref|XP_006596372.1|	5947	0	PREDICTED: chromosome-associated kinesin KIF4-like isoform X1 [Glycine max]
Glyma.14G185600.Wm82.a2.v1	110	101	34	59.7078	32	31	43	1.10381	0.00108228	0.00865795	up	yes	chrChr14:44970892-44973530:+	gi|356551795|ref|XP_003544259.1|	3184	0	PREDICTED: uncharacterized protein LOC100795015 [Glycine max]
Glyma.14G188700.Wm82.a2.v1	309	309	444	260.375	163	165	142	1.27084	8.78081e-11	3.73423e-09	up	yes	chrChr14:45337939-45339632:+	gi|571511372|ref|XP_006596411.1|	1317	7e-180	PREDICTED: uncharacterized protein LOC100806179 [Glycine max]
Glyma.14G192500.Wm82.a2.v1	335	107	171	132.028	55	52	46	1.82387	4.25044e-09	1.34887e-07	up	yes	chrChr14:45715135-45717866:+	gi|571511444|ref|XP_003544876.2|	2692	0	PREDICTED: cytochrome P450 86A1-like [Glycine max]
Glyma.14G195200.Wm82.a2.v1	698	788	563	531.768	363	395	337	1.03129	6.53647e-10	2.41097e-08	up	yes	chrChr14:46049236-46051706:+	gi|356553088|ref|XP_003544890.1|	1603	0	PREDICTED: probable protein phosphatase 2C 25-like [Glycine max]
Glyma.14G199200.Wm82.a2.v1	1084	1258	742	799.176	563	578	500	1.02304	8.63791e-08	2.11478e-06	up	yes	chrChr14:46425482-46428141:+	gi|356553118|ref|XP_003544905.1|	3099	0	PREDICTED: exocyst complex component EXO70B1-like [Glycine max]
Glyma.14G199600.Wm82.a2.v1	131	213	70	101.73	62	76	47	1.11238	0.000381587	0.00362912	up	yes	chrChr14:46458736-46460891:+	gi|571511622|ref|XP_006596448.1|	3688	0	PREDICTED: exocyst complex component EXO70B1-like [Glycine max]
Glyma.14G203500.Wm82.a2.v1	50	27	15	20.1143	10	3	12	1.33041	0.000919549	0.00758713	up	yes	chrChr14:46821151-46822027:-	gi|571511730|ref|XP_006596464.1|	965	2e-129	PREDICTED: uncharacterized protein LOC102660853 [Glycine max]
Glyma.14G207800.Wm82.a2.v1	105	89	67	142.887	202	223	195	-1.00378	2.23804e-06	4.12748e-05	down	yes	chrChr14:47370774-47371971:+	gi|571511873|ref|XP_003544950.2|	971	4e-129	PREDICTED: deoxyuridine 5'-triphosphate nucleotidohydrolase-like [Glycine max]
Glyma.14G208600.Wm82.a2.v1	413	440	362	661.853	948	1018	900	-1.03588	3.06224e-13	1.83948e-11	down	yes	chrChr14:47437358-47439597:-	gi|351724687|ref|NP_001237066.1|	404	8e-46	uncharacterized protein LOC100499862 [Glycine max]
Glyma.14G210700.Wm82.a2.v1	9436	8802	9425	6323.15	3212	2782	3309	1.709	2.16371e-46	6.32914e-44	up	yes	chrChr14:47577189-47584929:+	gi|356553237|ref|XP_003544964.1|	2344	0	PREDICTED: UTP--glucose-1-phosphate uridylyltransferase-like [Glycine max]
Glyma.14G212200.Wm82.a2.v1	347	363	188	193.225	89	101	35	1.84056	1.08945e-09	3.82146e-08	up	yes	chrChr14:47742907-47744519:+	gi|356553261|ref|XP_003544976.1|	2155	0	PREDICTED: U-box domain-containing protein 21-like [Glycine max]
Glyma.14G212500.Wm82.a2.v1	107	107	100	60.1153	8	5	18	2.89932	1.94936e-20	2.23804e-18	up	yes	chrChr14:47758067-47768578:-	gi|356552003|ref|XP_003544361.1|	4489	0	PREDICTED: potassium channel SKOR-like [Glycine max]
Glyma.14G214100.Wm82.a2.v1	144	38	75	56.7355	28	20	25	1.54072	1.20693e-05	0.000187614	up	yes	chrChr14:47899920-47902239:+	gi|734418221|gb|KHN39466.1|	1667	0	GDSL esterase/lipase [Glycine soja]
Glyma.14G215600.Wm82.a2.v1	83	73	65	121.672	208	181	141	-1.00741	5.90941e-06	9.83606e-05	down	yes	chrChr14:48014635-48016054:-	gi|356553293|ref|XP_003544991.1|	510	2e-62	PREDICTED: protein RSI-1-like [Glycine max]
Glyma.14G216300.Wm82.a2.v1	12146	11803	10928	8966.42	6372	5570	6155	1.09809	6.94214e-22	8.74631e-20	up	yes	chrChr14:48088714-48091531:+	gi|356553413|ref|XP_003545051.1|	1873	0	PREDICTED: cysteine proteinase 15A-like [Glycine max]
Glyma.14G218000.Wm82.a2.v1	1506	1580	1602	1168.2	688	673	834	1.23233	1.45414e-19	1.57286e-17	up	yes	chrChr14:48315500-48326555:+	gi|356553393|ref|XP_003545041.1|	5156	0	PREDICTED: 5'-3' exoribonuclease 3-like isoform X1 [Glycine max]
Glyma.14G219500.Wm82.a2.v1	163	176	130	88.4695	17	10	11	3.29418	4.16894e-32	8.1063e-30	up	yes	chrChr14:48448248-48454092:+	gi|571512229|ref|XP_006596545.1|	2803	0	PREDICTED: uncharacterized protein LOC100788162 isoform X1 [Glycine max]
Glyma.14G222000.Wm82.a2.v1	48	50	49	85.117	134	151	94	-1.0806	1.3613e-05	0.00020815	down	yes	chrChr14:48684766-48691598:+	gi|356553337|ref|XP_003545013.1|	2634	0	PREDICTED: calcium-dependent protein kinase 29-like isoformX1 [Glycine max]
Glyma.14G224000.Wm82.a2.v1	110	84	92	165.383	258	262	216	-1.12342	1.00002e-08	2.95603e-07	down	yes	chrChr14:48915990-48918345:-	gi|356553307|ref|XP_003544998.1|	1662	0	PREDICTED: cyclin-dependent kinase B2-2-like [Glycine max]
Glyma.14G224300.Wm82.a2.v1	10	8	1	15.3646	28	17	32	-1.15626	0.0044475	0.0271869	down	yes	chrChr14:48970446-48972842:-	gi|571512064|ref|XP_006596508.1|	1209	1e-164	PREDICTED: cyclin-J18-like isoform X1 [Glycine max]
Glyma.15G003300.Wm82.a2.v1	573	417	257	314.076	266	213	126	1.07034	0.000104723	0.00123664	up	yes	chrChr15:290145-292323:-	gi|734379238|gb|KHN22402.1|	1335	9e-180	Putative WRKY transcription factor 40 [Glycine soja]
Glyma.15G003700.Wm82.a2.v1	298	302	270	491.009	671	737	753	-1.10801	8.63325e-15	6.10113e-13	down	yes	chrChr15:343771-345651:-	gi|351721369|ref|NP_001236695.1|	660	1e-84	uncharacterized protein LOC100500093 [Glycine max]
Glyma.15G008300.Wm82.a2.v1	67	63	40	41.9689	24	27	26	1.11695	0.000207066	0.00218747	up	yes	chrChr15:669206-670550:-	gi|734379284|gb|KHN22448.1|	433	9e-50	hypothetical protein glysoja_024957 [Glycine soja]
Glyma.15G009600.Wm82.a2.v1	3939	3584	4250	2445.38	1145	606	641	2.30967	6.75715e-28	1.08758e-25	up	yes	chrChr15:743091-744124:-	gi|734379297|gb|KHN22461.1|	394	4e-44	hypothetical protein glysoja_024970 [Glycine soja]
Glyma.15G011200.Wm82.a2.v1	81	59	35	152.116	288	198	291	-1.75963	2.38263e-11	1.12887e-09	down	yes	chrChr15:846186-851115:-	gi|356555718|ref|XP_003546177.1|	3176	0	PREDICTED: boron transporter 4-like isoform X1 [Glycine max]
Glyma.15G011700.Wm82.a2.v1	51	26	49	77.7558	149	110	97	-1.1583	3.31313e-05	0.000459779	down	yes	chrChr15:898424-902078:-	gi|571514667|ref|XP_006597137.1|	3661	0	PREDICTED: trichohyalin-like [Glycine max]
Glyma.15G014000.Wm82.a2.v1	104	104	139	73.4316	27	34	18	2.02619	1.42938e-13	8.95397e-12	up	yes	chrChr15:1133409-1138851:+	gi|356556062|ref|XP_003546346.1|	3283	0	PREDICTED: probable sulfate transporter 3.4-like isoform 1 [Glycine max]
Glyma.15G015100.Wm82.a2.v1	3308	4708	2249	2244	1116	773	920	1.88426	7.05598e-17	6.08606e-15	up	yes	chrChr15:1199442-1203165:+	gi|571514788|ref|XP_006597152.1|	4233	0	PREDICTED: G-type lectin S-receptor-like serine/threonine-protein kinase CES101-like [Glycine max]
Glyma.15G019300.Wm82.a2.v1	6890	7836	7525	5753.74	4209	3661	3897	1.07031	2.22968e-20	2.55116e-18	up	yes	chrChr15:1488374-1494183:+	gi|356556489|ref|XP_003546557.1|	3187	0	PREDICTED: NADP-dependent malic enzyme 4, chloroplastic-like [Glycine max]
Glyma.15G019500.Wm82.a2.v1	43	39	23	18.4873	0	0	0	3.17756	1.26023e-14	8.81351e-13	up	yes	chrChr15:1521589-1523186:+	gi|356556499|ref|XP_003546562.1|	802	7e-105	PREDICTED: histidine-containing phosphotransfer protein 4-like [Glycine max]
Glyma.15G022700.Wm82.a2.v1	304	306	276	558.66	785	934	856	-1.32625	1.17809e-19	1.28252e-17	down	yes	chrChr15:1770973-1773607:-	gi|734403854|gb|KHN32676.1|	768	4e-99	60S ribosomal protein L28-2 [Glycine soja]
Glyma.15G029500.Wm82.a2.v1	112	51	64	54.8539	35	30	30	1.20318	9.58465e-05	0.00114576	up	yes	chrChr15:2377565-2381868:+	gi|358249332|ref|NP_001240034.1|	1127	1e-149	uncharacterized protein LOC100797515 [Glycine max]
Glyma.15G032300.Wm82.a2.v1	125	94	104	185.649	293	298	233	-1.11072	1.73993e-08	4.88969e-07	down	yes	chrChr15:2596749-2598273:-	gi|590583591|ref|XP_007014942.1|	707	1e-87	Histone superfamily protein [Theobroma cacao]
Glyma.15G034100.Wm82.a2.v1	169	166	226	100.308	4	3	3	4.65087	2.41149e-47	7.17876e-45	up	yes	chrChr15:2722009-2727957:-	gi|571515472|ref|XP_006597258.1|	2085	0	PREDICTED: 1-acyl-sn-glycerol-3-phosphate acyltransferase 3-like isoform X2 [Glycine max]
Glyma.15G034300.Wm82.a2.v1	16	19	12	28.8832	51	44	37	-1.07233	0.00106345	0.00854393	down	yes	chrChr15:2730657-2737709:-	gi|571515479|ref|XP_006597259.1|	4601	0	PREDICTED: origin recognition complex subunit 1-like [Glycine max]
Glyma.15G048200.Wm82.a2.v1	80	80	72	156.158	244	227	267	-1.41757	8.40843e-14	5.36719e-12	down	yes	chrChr15:3812816-3815263:+	gi|571513868|ref|XP_006596964.1|	1135	2e-153	PREDICTED: uncharacterized protein LOC100500064 isoform X1 [Glycine max]
Glyma.15G050600.Wm82.a2.v1	288	331	323	518.643	814	730	715	-1.059	4.60943e-14	3.03438e-12	down	yes	chrChr15:3987107-3991529:-	gi|356558589|ref|XP_003547587.1|	2615	0	PREDICTED: histidine decarboxylase [Glycine max]
Glyma.15G054700.Wm82.a2.v1	6320	6456	6390	4500.23	2351	2607	2249	1.55166	1.17847e-40	3.04943e-38	up	yes	chrChr15:4297127-4301404:-	gi|356554708|ref|XP_003545685.1|	2674	0	PREDICTED: phospho-2-dehydro-3-deoxyheptonate aldolase 2, chloroplastic [Glycine max]
Glyma.15G057300.Wm82.a2.v1	405	104	194	157.355	60	73	80	1.55041	1.92937e-06	3.62178e-05	up	yes	chrChr15:4423953-4424787:-	gi|358248616|ref|NP_001240167.1|	203	5e-17	uncharacterized protein LOC100779620 precursor [Glycine max]
Glyma.15G057500.Wm82.a2.v1	666	212	378	292.916	114	179	163	1.39656	2.67023e-06	4.83704e-05	up	yes	chrChr15:4430421-4431198:-	gi|351724205|ref|NP_001235258.1|	236	1e-21	uncharacterized protein LOC100305684 [Glycine max]
Glyma.15G057600.Wm82.a2.v1	34	16	10	52.8911	109	93	69	-1.60956	1.34527e-06	2.59929e-05	down	yes	chrChr15:4432971-4434066:-	gi|255630820|gb|ACU15772.1|	236	2e-21	unknown [Glycine max]
Glyma.15G061700.Wm82.a2.v1	23	13	21	41.2981	68	68	64	-1.39426	3.20348e-06	5.65976e-05	down	yes	chrChr15:4753329-4757303:-	gi|356557611|ref|XP_003547109.1|	3161	0	PREDICTED: DNA ligase 1-like [Glycine max]
Glyma.15G064100.Wm82.a2.v1	5	5	3	13.213	27	18	25	-1.46874	0.000223288	0.00232645	down	yes	chrChr15:4877866-4879175:-	gi|571516450|ref|XP_006597378.1|	850	2e-111	PREDICTED: uncharacterized protein LOC102668671 [Glycine max]
Glyma.15G071300.Wm82.a2.v1	377	366	266	227.113	133	116	68	1.68444	1.16608e-12	6.55947e-11	up	yes	chrChr15:5466051-5469568:+	gi|363808276|ref|NP_001242496.1|	1344	0	uncharacterized protein LOC100804761 [Glycine max]
Glyma.15G074800.Wm82.a2.v1	95	65	28	44.6918	30	37	7	1.06164	0.00603272	0.0347968	up	yes	chrChr15:5733950-5736407:+	gi|574584591|ref|NP_001276176.1|	1595	0	uncharacterized protein LOC100797510 [Glycine max]
Glyma.15G078900.Wm82.a2.v1	85	71	63	39.0297	2	1	0	3.91854	1.4944e-25	2.24421e-23	up	yes	chrChr15:6070129-6071615:-	gi|356549267|ref|XP_003543017.1|	924	7e-120	PREDICTED: uncharacterized protein LOC100789379 isoform X1 [Glycine max]
Glyma.15G081000.Wm82.a2.v1	72	48	59	44.6821	22	35	27	1.07887	0.000284095	0.00285052	up	yes	chrChr15:6191942-6196250:+	gi|571517020|ref|XP_003546023.2|	2001	0	PREDICTED: GDSL esterase/lipase At1g31550-like [Glycine max]
Glyma.15G082400.Wm82.a2.v1	65	101	97	59.5526	28	36	21	1.55811	5.5818e-08	1.42355e-06	up	yes	chrChr15:6283505-6285316:-	gi|356555418|ref|XP_003546029.1|	715	1e-91	PREDICTED: dof zinc finger protein DOF1.5-like [Glycine max]
Glyma.15G085500.Wm82.a2.v1	111	63	110	67.6306	59	27	27	1.25632	6.24399e-05	0.000794408	up	yes	chrChr15:6554593-6556220:-	gi|356555445|ref|XP_003546042.1|	1032	3e-135	PREDICTED: uncharacterized protein LOC100782674 [Glycine max]
Glyma.15G085700.Wm82.a2.v1	86	87	89	46.2745	0	1	0	4.39018	9.94612e-32	1.90101e-29	up	yes	chrChr15:6566627-6567297:+	.	.	.	.
Glyma.15G087300.Wm82.a2.v1	5	0	9	16.7836	53	23	16	-1.39073	0.000891668	0.00740271	down	yes	chrChr15:6723421-6725900:+	gi|356555459|ref|XP_003546049.1|	1430	0	PREDICTED: nodulin-26-like [Glycine max]
Glyma.15G091600.Wm82.a2.v1	1309	1544	1537	1080.98	744	807	423	1.23657	4.11664e-09	1.30888e-07	up	yes	chrChr15:7061732-7066615:+	gi|356555504|ref|XP_003546071.1|	3385	0	PREDICTED: uncharacterized membrane protein C24H6.13-like [Glycine max]
Glyma.15G093100.Wm82.a2.v1	262	197	297	163.254	134	41	19	1.14851	0.0063728	0.0362853	up	yes	chrChr15:7225813-7228753:-	gi|356555522|ref|XP_003546080.1|	702	7e-91	PREDICTED: protein TIFY 5A-like [Glycine max]
Glyma.15G096500.Wm82.a2.v1	62	46	87	114.156	185	164	162	-1.10975	3.59546e-06	6.26997e-05	down	yes	chrChr15:7502097-7504633:-	gi|571517370|ref|XP_006597534.1|	378	6e-40	PREDICTED: uncharacterized protein LOC102663723 isoform X1 [Glycine max]
Glyma.15G098100.Wm82.a2.v1	5724	5494	3846	3746.9	3059	2003	1958	1.20003	2.04485e-09	6.89938e-08	up	yes	chrChr15:7627663-7630521:+	gi|351726594|ref|NP_001236364.1|	2809	0	inactive beta-amylase-like [Glycine max]
Glyma.15G099500.Wm82.a2.v1	86	98	148	84.3872	52	65	49	1.04363	7.01506e-05	0.000878881	up	yes	chrChr15:7747286-7752481:+	gi|571517491|ref|XP_003547222.2|	2388	0	PREDICTED: sugar transporter ERD6-like 16-like [Glycine max]
Glyma.15G100200.Wm82.a2.v1	7	5	5	21.8519	57	30	34	-1.88804	5.25398e-07	1.10186e-05	down	yes	chrChr15:7785118-7789615:-	gi|356555589|ref|XP_003546113.1|	1669	0	PREDICTED: uncharacterized protein At4g15545-like [Glycine max]
Glyma.15G101600.Wm82.a2.v1	366	379	265	248.058	167	145	138	1.26523	4.85662e-11	2.1553e-09	up	yes	chrChr15:7914179-7916576:-	gi|356555602|ref|XP_003546119.1|	2075	0	PREDICTED: F-box/kelch-repeat protein At3g23880-like isoform X1 [Glycine max]
Glyma.15G104800.Wm82.a2.v1	19	25	11	11.3925	5	4	2	1.47727	0.000331717	0.00323438	up	yes	chrChr15:8202396-8203891:+	gi|571522498|ref|XP_006598338.1|	1999	0	PREDICTED: basic 7S globulin 2-like, partial [Glycine max]
Glyma.15G104900.Wm82.a2.v1	2385	2218	1947	1592.01	1012	983	814	1.35161	8.8973e-21	1.05758e-18	up	yes	chrChr15:8210571-8213067:+	gi|356555630|ref|XP_003546133.1|	2037	0	PREDICTED: basic 7S globulin [Glycine max]
Glyma.15G105300.Wm82.a2.v1	105	128	184	91.2044	35	43	36	1.81666	5.36925e-12	2.74493e-10	up	yes	chrChr15:8255687-8260063:+	gi|356557893|ref|XP_003547244.1|	2328	0	PREDICTED: protein YLS7-like isoform X1 [Glycine max]
Glyma.15G105900.Wm82.a2.v1	1281	2010	1091	1121.19	617	598	1027	1.0357	1.65415e-05	0.000246103	up	yes	chrChr15:8301661-8304992:+	gi|571522502|ref|XP_003547247.2|	1910	0	PREDICTED: beta-glucosidase 47-like [Glycine max]
Glyma.15G108300.Wm82.a2.v1	329	385	292	238.349	109	134	149	1.44643	4.74569e-14	3.11798e-12	up	yes	chrChr15:8518412-8520954:-	gi|356555672|ref|XP_003546154.1|	2291	0	PREDICTED: ankyrin repeat domain-containing protein 13C-like [Glycine max]
Glyma.15G111300.Wm82.a2.v1	935	1002	974	622.599	256	216	234	2.15588	1.10085e-55	4.46161e-53	up	yes	chrChr15:8714067-8721869:-	gi|571517778|ref|XP_006597595.1|	2900	0	PREDICTED: chitin elicitor receptor kinase 1-like isoform X2 [Glycine max]
Glyma.15G112500.Wm82.a2.v1	337	235	236	191.601	136	74	106	1.39861	3.27638e-09	1.06077e-07	up	yes	chrChr15:8855605-8858218:-	gi|356555702|ref|XP_003546169.1|	1228	3e-164	PREDICTED: plastid-lipid-associated protein, chloroplastic-like [Glycine max]
Glyma.15G113200.Wm82.a2.v1	63	53	68	100.974	156	139	144	-1.00686	2.77286e-06	4.97739e-05	down	yes	chrChr15:8911602-8915910:+	gi|356557953|ref|XP_003547274.1|	2738	0	PREDICTED: EH domain-containing protein 1-like [Glycine max]
Glyma.15G114700.Wm82.a2.v1	165	163	202	108.011	22	37	35	2.41315	7.97232e-23	1.05583e-20	up	yes	chrChr15:9024267-9025694:-	gi|356532531|ref|XP_003534825.1|	1470	0	PREDICTED: acyl-CoA--sterol O-acyltransferase 1-like [Glycine max]
Glyma.15G115500.Wm82.a2.v1	1104	1052	1074	734.283	391	316	354	1.73155	3.44558e-37	7.88475e-35	up	yes	chrChr15:9087902-9093221:+	gi|734404449|gb|KHN32960.1|	1346	0	Inositol monophosphatase 3 [Glycine soja]
Glyma.15G117000.Wm82.a2.v1	41	28	39	67.2066	90	117	101	-1.19877	3.86398e-06	6.67936e-05	down	yes	chrChr15:9192797-9196335:-	gi|356557973|ref|XP_003547284.1|	1581	0	PREDICTED: epidermal growth factor receptor substrate 15-like [Glycine max]
Glyma.15G121100.Wm82.a2.v1	119	152	149	103.29	59	65	64	1.23529	1.35222e-08	3.90448e-07	up	yes	chrChr15:9567797-9570248:+	gi|571517973|ref|XP_006597617.1|	1350	0	PREDICTED: U-box domain-containing protein 54-like [Glycine max]
Glyma.15G124000.Wm82.a2.v1	8	5	5	16.7548	32	24	31	-1.48389	9.49512e-05	0.00113627	down	yes	chrChr15:9845097-9849312:-	gi|571518094|ref|XP_003546223.2|	2140	0	PREDICTED: protein ENDOSPERM DEFECTIVE 1-like [Glycine max]
Glyma.15G124400.Wm82.a2.v1	183	186	163	130.514	88	88	60	1.25221	4.52648e-09	1.42039e-07	up	yes	chrChr15:9881706-9885816:+	gi|571514108|ref|XP_006597029.1|	1511	0	PREDICTED: uncharacterized protein LOC100792235 isoform X1 [Glycine max]
Glyma.15G126900.Wm82.a2.v1	112	94	107	66.6742	25	23	26	2.01486	5.44872e-15	3.93325e-13	up	yes	chrChr15:10068929-10072999:-	gi|571518150|ref|XP_006597652.1|	4715	0	PREDICTED: putative disease resistance protein RGA3-like [Glycine max]
Glyma.15G128700.Wm82.a2.v1	3523	3426	3624	2385.42	1025	1256	1071	1.78282	4.38244e-42	1.19854e-39	up	yes	chrChr15:10263477-10266711:+	gi|571514246|ref|XP_006597070.1|	1767	0	PREDICTED: peroxidase, pathogen-induced isoform X1 [Glycine max]
Glyma.15G129900.Wm82.a2.v1	507	480	500	338.616	175	148	169	1.70804	5.68272e-29	9.55806e-27	up	yes	chrChr15:10432073-10438579:-	gi|356555881|ref|XP_003546258.1|	937	7e-122	PREDICTED: nuclear transcription factor Y subunit A-7-like isoformX1 [Glycine max]
Glyma.15G131600.Wm82.a2.v1	13	3	1	17.2273	31	34	26	-1.37371	0.000779117	0.00659671	down	yes	chrChr15:10576367-10579517:+	gi|571518250|ref|XP_003547331.2|	3054	0	PREDICTED: uncharacterized protein LOC100794684 isoform X1 [Glycine max]
Glyma.15G132800.Wm82.a2.v1	273	412	203	207.123	114	112	100	1.47203	9.83189e-10	3.48877e-08	up	yes	chrChr15:10679770-10681942:+	gi|356555928|ref|XP_003546281.1|	2706	0	PREDICTED: reticuline oxidase-like protein-like [Glycine max]
Glyma.15G133000.Wm82.a2.v1	493	514	529	273.156	9	8	1	5.64385	2.15886e-95	1.72909e-92	up	yes	chrChr15:10693333-10695547:-	.	.	.	.
Glyma.15G133300.Wm82.a2.v1	72	78	74	39.7341	1	0	1	4.08324	1.56382e-27	2.48139e-25	up	yes	chrChr15:10713640-10714173:-	.	.	.	.
Glyma.15G134400.Wm82.a2.v1	52	36	43	109.931	199	181	176	-1.76818	1.96746e-15	1.48062e-13	down	yes	chrChr15:10795047-10797469:-	gi|734356857|gb|KHN14294.1|	2016	0	Patellin-4 [Glycine soja]
Glyma.15G134900.Wm82.a2.v1	255	237	227	156.917	58	67	69	1.94468	1.66936e-23	2.25525e-21	up	yes	chrChr15:10834904-10838273:+	gi|356558095|ref|XP_003547343.1|	1941	0	PREDICTED: probable folate-biopterin transporter 7-like [Glycine max]
Glyma.15G141900.Wm82.a2.v1	17	31	9	69.1221	82	188	107	-2.00816	5.39658e-09	1.67314e-07	down	yes	chrChr15:11601870-11602535:-	gi|351723087|ref|NP_001234963.1|	429	8e-51	uncharacterized protein LOC100305921 [Glycine max]
Glyma.15G142000.Wm82.a2.v1	0	1	1	18.5283	28	57	31	-2.79223	1.00932e-11	5.01513e-10	down	yes	chrChr15:11605472-11606204:-	gi|734357898|gb|KHN14676.1|	460	4e-55	hypothetical protein glysoja_024771 [Glycine soja]
Glyma.15G143700.Wm82.a2.v1	95	114	159	201.639	349	259	269	-1.00232	4.40097e-06	7.52204e-05	down	yes	chrChr15:11812631-11819435:+	gi|356556038|ref|XP_003546334.1|	4092	0	PREDICTED: beta-D-xylosidase 1-like [Glycine max]
Glyma.15G143900.Wm82.a2.v1	106	45	77	50.0413	21	24	18	1.66483	2.39769e-07	5.46079e-06	up	yes	chrChr15:11830914-11834773:+	gi|359806102|ref|NP_001241443.1|	910	6e-120	uncharacterized protein LOC100806363 precursor [Glycine max]
Glyma.15G144100.Wm82.a2.v1	24	15	27	38.6334	64	46	63	-1.02121	0.000970199	0.00791573	down	yes	chrChr15:11848711-11854145:-	gi|571518588|ref|XP_006597713.1|	4630	0	PREDICTED: uncharacterized protein LOC102669513 [Glycine max]
Glyma.15G148300.Wm82.a2.v1	31	35	46	64.4917	119	83	85	-1.0499	8.73216e-05	0.00105738	down	yes	chrChr15:12198472-12200562:-	gi|734357843|gb|KHN14621.1|	1521	0	Protein FAM179B-like protein [Glycine soja]
Glyma.15G149600.Wm82.a2.v1	15	18	9	34.5745	64	62	48	-1.53565	2.13031e-06	3.94829e-05	down	yes	chrChr15:12350959-12352153:+	gi|356556094|ref|XP_003546362.1|	426	5e-50	PREDICTED: late embryogenesis abundant protein Lea5 [Glycine max]
Glyma.15G150300.Wm82.a2.v1	7	4	4	13.5256	43	15	12	-1.20084	0.00370576	0.0234584	down	yes	chrChr15:12416065-12418420:-	gi|356558177|ref|XP_003547384.1|	2426	0	PREDICTED: MATE efflux family protein 5-like [Glycine max]
Glyma.15G151300.Wm82.a2.v1	33	34	11	17.7824	14	10	2	1.08028	0.00842781	0.0452953	up	yes	chrChr15:12544050-12544884:+	gi|734374879|gb|KHN20788.1|	464	2e-55	hypothetical protein glysoja_037388, partial [Glycine soja]
Glyma.15G152900.Wm82.a2.v1	1512	2378	1296	1169.12	526	613	505	1.70813	2.54239e-16	2.09617e-14	up	yes	chrChr15:12680146-12681864:-	gi|351727731|ref|NP_001236659.1|	898	1e-113	src2 protein [Glycine max]
Glyma.15G157500.Wm82.a2.v1	447	386	459	323.148	200	217	195	1.20365	3.84758e-14	2.56803e-12	up	yes	chrChr15:13208021-13213532:-	gi|358248066|ref|NP_001240060.1|	1425	0	uncharacterized protein LOC100791886 [Glycine max]
Glyma.15G158200.Wm82.a2.v1	160	88	91	78.3577	41	56	22	1.40522	7.00868e-06	0.000114895	up	yes	chrChr15:13251793-13252987:-	gi|571518916|ref|XP_006597761.1|	924	2e-120	PREDICTED: uncharacterized protein LOC102660944 [Glycine max]
Glyma.15G160300.Wm82.a2.v1	253	495	327	275.438	192	215	146	1.02957	1.67054e-05	0.000247666	up	yes	chrChr15:13586890-13593935:-	gi|571518976|ref|XP_006597772.1|	3990	0	PREDICTED: ankyrin repeat-containing protein At5g02620-like isoform X3 [Glycine max]
Glyma.15G161600.Wm82.a2.v1	139	186	51	88.6357	56	51	37	1.25964	0.000143901	0.00161626	up	yes	chrChr15:13802633-13804321:+	gi|571519029|ref|XP_006597777.1|	2120	0	PREDICTED: G-type lectin S-receptor-like serine/threonine-protein kinase At1g34300-like [Glycine max]
Glyma.15G161700.Wm82.a2.v1	231	179	116	129.414	110	48	78	1.15392	6.04161e-05	0.000773046	up	yes	chrChr15:13811027-13813284:+	gi|356558284|ref|XP_003547437.1|	2221	0	PREDICTED: G-type lectin S-receptor-like serine/threonine-protein kinase At2g19130-like [Glycine max]
Glyma.15G162000.Wm82.a2.v1	150	201	237	109.856	12	11	18	3.48141	1.0163e-35	2.21996e-33	up	yes	chrChr15:13834755-13836225:-	gi|571522697|ref|XP_003546410.2|	2191	0	PREDICTED: G-type lectin S-receptor-like serine/threonine-protein kinase At1g34300-like [Glycine max]
Glyma.15G163200.Wm82.a2.v1	184	177	49	100.414	76	44	61	1.08138	0.00140357	0.0106918	up	yes	chrChr15:14007587-14011556:+	gi|356556206|ref|XP_003546417.1|	1557	0	PREDICTED: uncharacterized protein LOC100806898 [Glycine max]
Glyma.15G168400.Wm82.a2.v1	181	186	172	115.633	54	43	36	2.02877	3.64892e-20	4.11899e-18	up	yes	chrChr15:14999711-15001091:+	gi|734385221|gb|KHN24623.1|	345	7e-36	hypothetical protein glysoja_032267 [Glycine soja]
Glyma.15G169100.Wm82.a2.v1	320	322	704	318.026	182	204	133	1.36445	5.2453e-07	1.10073e-05	up	yes	chrChr15:15123371-15125651:+	gi|734385212|gb|KHN24614.1|	1557	0	Brassinosteroid-regulated protein BRU1 [Glycine soja]
Glyma.15G170500.Wm82.a2.v1	39	56	18	25.1999	10	17	7	1.34252	0.000453266	0.00420155	up	yes	chrChr15:15477823-15482961:+	gi|356558363|ref|XP_003547476.1|	2573	0	PREDICTED: putative transcription factor bHLH041-like isoform X1 [Glycine max]
Glyma.15G171000.Wm82.a2.v1	674	542	466	433.071	379	303	195	1.02756	5.33325e-06	8.95683e-05	up	yes	chrChr15:15602187-15606370:+	gi|356556294|ref|XP_003546461.1|	2463	0	PREDICTED: uncharacterized protein LOC100784098 [Glycine max]
Glyma.15G177900.Wm82.a2.v1	815	812	770	600.149	385	434	321	1.20087	5.57268e-15	3.997e-13	up	yes	chrChr15:16920585-16924460:+	gi|356558419|ref|XP_003547504.1|	2139	0	PREDICTED: serine/threonine-protein kinase At5g01020-like [Glycine max]
Glyma.15G180000.Wm82.a2.v1	85	128	67	53.32	6	11	9	2.86972	3.96614e-18	3.81192e-16	up	yes	chrChr15:17375377-17376578:-	gi|356556404|ref|XP_003546516.1|	922	7e-121	PREDICTED: ethylene-responsive transcription factor ERF017 [Glycine max]
Glyma.15G181600.Wm82.a2.v1	277	239	262	188.319	92	137	99	1.32939	5.59295e-11	2.46258e-09	up	yes	chrChr15:17656948-17658769:-	gi|356556414|ref|XP_003546521.1|	890	3e-113	PREDICTED: 21 kDa protein [Glycine max]
Glyma.15G181800.Wm82.a2.v1	1783	2066	1867	1180.21	308	442	364	2.43188	7.35678e-51	2.57786e-48	up	yes	chrChr15:17700906-17701994:-	gi|356556416|ref|XP_003546522.1|	797	1e-102	PREDICTED: uncharacterized protein LOC100817225 [Glycine max]
Glyma.15G185700.Wm82.a2.v1	119	131	75	73.9197	35	33	39	1.56689	7.07027e-09	2.14654e-07	up	yes	chrChr15:18792337-18793380:-	gi|351721040|ref|NP_001237964.1|	511	2e-61	uncharacterized protein LOC100527310 [Glycine max]
Glyma.15G186100.Wm82.a2.v1	3897	3690	5146	2971.92	1690	1983	1000	1.49793	1.24444e-11	6.11119e-10	up	yes	chrChr15:19040481-19044589:+	gi|734322771|gb|KHN04668.1|	981	8e-131	Guanine deaminase [Glycine soja]
Glyma.15G189700.Wm82.a2.v1	38	14	16	15.585	9	8	6	1.14247	0.00421224	0.0259837	up	yes	chrChr15:20130743-20131653:-	gi|571519911|ref|XP_006597916.1|	846	1e-111	PREDICTED: uncharacterized protein LOC100790662 [Glycine max]
Glyma.15G191800.Wm82.a2.v1	100	29	63	44.4662	30	16	22	1.28169	0.000328593	0.0032123	up	yes	chrChr15:20791211-20792732:-	gi|356556491|ref|XP_003546558.1|	1060	8e-144	PREDICTED: CASP-like protein 9-like [Glycine max]
Glyma.15G193000.Wm82.a2.v1	137	126	129	218.928	283	279	397	-1.05457	8.86294e-08	2.16357e-06	down	yes	chrChr15:21115215-21126156:-	gi|356556497|ref|XP_003546561.1|	4686	0	PREDICTED: periodic tryptophan protein 2-like [Glycine max]
Glyma.15G195500.Wm82.a2.v1	478	453	448	800.892	1138	1246	1186	-1.17292	4.66312e-20	5.22876e-18	down	yes	chrChr15:22368017-22369973:+	gi|351722737|ref|NP_001238278.1|	626	1e-79	uncharacterized protein LOC100306401 [Glycine max]
Glyma.15G197300.Wm82.a2.v1	1	5	5	9.60396	12	19	18	-1.13318	0.0064802	0.0367787	down	yes	chrChr15:22963749-22966948:-	gi|734328642|gb|KHN06027.1|	1204	9e-157	CBL-interacting serine/threonine-protein kinase 23 [Glycine soja]
Glyma.15G201700.Wm82.a2.v1	24	31	37	58.0667	93	93	82	-1.21876	4.21079e-06	7.23056e-05	down	yes	chrChr15:24785427-24788553:-	gi|571520170|ref|XP_003546600.2|	2285	0	PREDICTED: uncharacterized protein LOC100814752 [Glycine max]
Glyma.15G201800.Wm82.a2.v1	13	17	15	37.6046	71	73	46	-1.57461	7.30641e-07	1.49593e-05	down	yes	chrChr15:24825668-24827432:-	gi|734424960|gb|KHN42853.1|	1011	5e-135	Putative RING finger protein P32A8.03c [Glycine soja]
Glyma.15G206200.Wm82.a2.v1	614	695	605	483.099	305	286	345	1.16518	3.95633e-15	2.88692e-13	up	yes	chrChr15:28958236-28963386:-	gi|356556600|ref|XP_003546612.1|	3648	0	PREDICTED: two-component response regulator ARR12-like [Glycine max]
Glyma.15G210400.Wm82.a2.v1	25	19	16	10.7218	1	0	0	2.40244	1.09191e-08	3.21354e-07	up	yes	chrChr15:32262290-32264065:+	gi|571523108|ref|XP_006598495.1|	1046	6e-140	PREDICTED: bidirectional sugar transporter SWEET2-like [Glycine max]
Glyma.15G211800.Wm82.a2.v1	536	544	524	379.239	204	209	207	1.4978	6.1399e-26	9.38819e-24	up	yes	chrChr15:32835023-32838031:-	gi|571520373|ref|XP_006597983.1|	1139	2e-153	PREDICTED: bidirectional sugar transporter SWEET2 isoform X1 [Glycine max]
Glyma.15G218900.Wm82.a2.v1	3496	2473	2253	2079.25	1261	1594	1179	1.13415	2.82983e-09	9.30525e-08	up	yes	chrChr15:37466434-37467688:-	gi|734420599|gb|KHN40931.1|	789	2e-103	MLP-like protein 43 [Glycine soja]
Glyma.15G228000.Wm82.a2.v1	44	50	54	32.5787	25	11	6	1.52216	1.96291e-05	0.000286813	up	yes	chrChr15:42161836-42165579:-	gi|593262938|ref|XP_007133648.1|	1124	4e-147	hypothetical protein PHAVU_011G197200g [Phaseolus vulgaris]
Glyma.15G236100.Wm82.a2.v1	75	63	77	155.86	205	295	254	-1.52565	1.27699e-12	7.11204e-11	down	yes	chrChr15:44461425-44470198:+	gi|356556821|ref|XP_003546719.1|	2566	0	PREDICTED: probable peptide/nitrate transporter At3g54450-like [Glycine max]
Glyma.15G243000.Wm82.a2.v1	60	49	69	139.075	226	266	197	-1.65089	5.64537e-14	3.70184e-12	down	yes	chrChr15:46412967-46414442:+	gi|356556872|ref|XP_003546744.1|	513	8e-63	PREDICTED: glucan endo-1,3-beta-glucosidase-like isoform X1 [Glycine max]
Glyma.15G247900.Wm82.a2.v1	78	92	60	58.4829	31	54	30	1.00635	0.000573717	0.00513005	up	yes	chrChr15:47294126-47295037:+	gi|734396860|gb|KHN29842.1|	703	2e-90	hypothetical protein glysoja_034086 [Glycine soja]
Glyma.15G251500.Wm82.a2.v1	2348	2480	1680	1311.65	338	485	239	2.56413	2.78898e-29	4.78666e-27	up	yes	chrChr15:47966984-47968566:+	gi|220683633|gb|ACL80571.1|	1019	2e-136	glutathione S-transferase [Glycine max]
Glyma.15G251900.Wm82.a2.v1	236	184	168	148.624	76	106	106	1.11175	4.91908e-07	1.0394e-05	up	yes	chrChr15:48002286-48003824:-	gi|351727831|ref|NP_001237686.1|	1184	2e-160	glutathione S-transferase GST 16 [Glycine max]
Glyma.15G253500.Wm82.a2.v1	11	28	21	13.8305	7	10	4	1.08747	0.00687683	0.038426	up	yes	chrChr15:48215975-48220366:-	gi|571521581|ref|XP_006598182.1|	1991	0	PREDICTED: probable LRR receptor-like serine/threonine-protein kinase At1g53440-like [Glycine max]
Glyma.15G254100.Wm82.a2.v1	97	84	76	147.913	204	175	278	-1.0909	1.28111e-06	2.49043e-05	down	yes	chrChr15:48310048-48312110:-	gi|356555162|ref|XP_003545905.1|	1660	0	PREDICTED: ribosomal L1 domain-containing protein 1-like [Glycine max]
Glyma.15G258100.Wm82.a2.v1	98	119	62	62.2039	33	24	27	1.63845	1.90831e-08	5.32286e-07	up	yes	chrChr15:48836752-48841735:+	gi|359807226|ref|NP_001241363.1|	835	4e-109	uncharacterized protein LOC100790989 [Glycine max]
Glyma.15G262600.Wm82.a2.v1	497	337	450	274.567	175	80	56	1.91754	4.09147e-11	1.84425e-09	up	yes	chrChr15:49532350-49534743:+	gi|571521800|ref|XP_006598219.1|	1176	4e-157	PREDICTED: uncharacterized protein LOC100804596 [Glycine max]
Glyma.15G267100.Wm82.a2.v1	259	294	268	457.291	568	668	764	-1.07017	8.37714e-11	3.58523e-09	down	yes	chrChr15:50345110-50347801:-	gi|363807152|ref|NP_001242344.1|	1362	0	uncharacterized protein LOC100818292 [Glycine max]
Glyma.15G268200.Wm82.a2.v1	438	379	236	221.304	111	95	24	1.48115	0.000278892	0.00280719	up	yes	chrChr15:50451999-50453074:+	gi|356557100|ref|XP_003546856.1|	332	4e-35	PREDICTED: uncharacterized protein LOC100776077 [Glycine max]
Glyma.15G270000.Wm82.a2.v1	243	70	93	86.3029	43	35	16	1.73984	1.23833e-06	2.42047e-05	up	yes	chrChr15:50718475-50719273:-	gi|734438241|gb|KHN49041.1|	317	6e-34	hypothetical protein glysoja_031252 [Glycine soja]
Glyma.15G273700.Wm82.a2.v1	20	25	36	46.7755	63	70	75	-1.02712	0.000393018	0.00372311	down	yes	chrChr15:51138129-51141953:+	gi|571522100|ref|XP_006598258.1|	1855	0	PREDICTED: uncharacterized protein LOC100790472 isoform X2 [Glycine max]
Glyma.15G274000.Wm82.a2.v1	15	21	9	28.3488	58	39	34	-1.06734	0.00220605	0.0154313	down	yes	chrChr15:51156044-51170334:-	gi|571522118|ref|XP_006598262.1|	6257	0	PREDICTED: telomerase reverse transcriptase-like isoform X1 [Glycine max]
Glyma.15G275100.Wm82.a2.v1	28	21	26	13.9796	5	0	0	2.16154	1.94908e-07	4.49077e-06	up	yes	chrChr15:51350998-51355557:-	gi|356555319|ref|XP_003545981.1|	1230	1e-167	PREDICTED: BRCA1-A complex subunit BRE-like [Glycine max]
Glyma.15G276000.Wm82.a2.v1	117	98	123	189.106	312	246	272	-1.06476	1.33046e-08	3.85489e-07	down	yes	chrChr15:51495263-51502516:-	gi|356555329|ref|XP_003545986.1|	6657	0	PREDICTED: DNA topoisomerase 2-like [Glycine max]
Glyma.16G002900.Wm82.a2.v1	30	31	36	76.7461	129	108	145	-1.63113	5.22293e-11	2.30873e-09	down	yes	chrChr16:156082-159119:-	gi|571524002|ref|XP_006598726.1|	746	9e-95	PREDICTED: uncharacterized protein LOC100780350 isoform X1 [Glycine max]
Glyma.16G004500.Wm82.a2.v1	15	14	20	9.72252	2	4	1	1.63218	8.94552e-05	0.00108011	up	yes	chrChr16:257263-259156:+	gi|734418506|gb|KHN39660.1|	341	4e-36	hypothetical protein glysoja_020738 [Glycine soja]
Glyma.16G014900.Wm82.a2.v1	72	74	71	50.8396	33	27	21	1.40078	3.50344e-07	7.68769e-06	up	yes	chrChr16:1304070-1306429:+	gi|571524723|ref|XP_006598856.1|	498	4e-60	PREDICTED: uncharacterized protein LOC102665479 isoform X1 [Glycine max]
Glyma.16G015600.Wm82.a2.v1	230	223	248	174.185	119	126	80	1.19955	5.61717e-09	1.73673e-07	up	yes	chrChr16:1366415-1369019:-	gi|356559388|ref|XP_003547981.1|	1235	2e-167	PREDICTED: uncharacterized protein LOC100778042 [Glycine max]
Glyma.16G017500.Wm82.a2.v1	146	155	64	219.579	394	316	285	-1.13501	1.61588e-05	0.000241907	down	yes	chrChr16:1553689-1556564:+	gi|356559589|ref|XP_003548081.1|	1841	0	PREDICTED: flavonol synthase/flavanone 3-hydroxylase-like [Glycine max]
Glyma.16G018500.Wm82.a2.v1	5292	5681	4586	3619.47	1922	1258	2463	1.53199	1.11416e-13	7.04499e-12	up	yes	chrChr16:1643418-1648032:+	gi|356559698|ref|XP_003548134.1|	3053	0	PREDICTED: granule-bound starch synthase 1, chloroplastic/amyloplastic-like isoform X1 [Glycine max]
Glyma.16G020800.Wm82.a2.v1	2	0	2	7.39638	26	13	4	-1.27091	0.00249122	0.0169949	down	yes	chrChr16:1926536-1927235:-	gi|358249150|ref|NP_001240001.1|	574	3e-72	uncharacterized protein LOC100808516 [Glycine max]
Glyma.16G022500.Wm82.a2.v1	256	243	193	155.664	93	53	71	1.70182	6.70384e-14	4.35348e-12	up	yes	chrChr16:2116004-2119420:-	gi|593266202|ref|XP_007135279.1|	175	3e-23	hypothetical protein PHAVU_010G115900g [Phaseolus vulgaris]
Glyma.16G023000.Wm82.a2.v1	154	92	136	95.1151	70	78	30	1.0861	0.000290366	0.00290444	up	yes	chrChr16:2180288-2181712:+	gi|351722536|ref|NP_001238271.1|	1262	3e-171	MYB transcription factor MYB92 [Glycine max]
Glyma.16G023400.Wm82.a2.v1	23	30	38	63.1169	76	105	120	-1.3563	1.49648e-06	2.86838e-05	down	yes	chrChr16:2236221-2238999:+	gi|734361978|gb|KHN15921.1|	2130	0	hypothetical protein glysoja_013137 [Glycine soja]
Glyma.16G026400.Wm82.a2.v1	454	834	317	379.455	139	262	220	1.33252	3.34014e-06	5.88575e-05	up	yes	chrChr16:2563164-2566407:+	gi|734362008|gb|KHN15951.1|	1800	0	Putative WRKY transcription factor 46 [Glycine soja]
Glyma.16G029400.Wm82.a2.v1	19	27	16	38.2853	41	48	86	-1.06445	0.00152566	0.0114532	down	yes	chrChr16:2800976-2802176:+	gi|356560646|ref|XP_003548601.1|	1125	4e-151	PREDICTED: uncharacterized protein LOC100778582 [Glycine max]
Glyma.16G030000.Wm82.a2.v1	19	15	13	39.9748	39	116	47	-1.45428	6.23846e-05	0.000794005	down	yes	chrChr16:2854583-2860239:+	gi|734362038|gb|KHN15981.1|	5752	0	BAG family molecular chaperone regulator 6 [Glycine soja]
Glyma.16G033800.Wm82.a2.v1	1855	2204	2160	1585.21	1013	968	1160	1.12581	1.38762e-16	1.18173e-14	up	yes	chrChr16:3167697-3172780:+	gi|571525323|ref|XP_006598945.1|	3522	0	PREDICTED: ferric reduction oxidase 2-like isoform X2 [Glycine max]
Glyma.16G033900.Wm82.a2.v1	437	651	288	347.443	301	193	182	1.07082	4.05767e-05	0.000547957	up	yes	chrChr16:3174939-3181746:-	gi|571525329|ref|XP_006598946.1|	5829	0	PREDICTED: TMV resistance protein N-like isoform X1 [Glycine max]
Glyma.16G038200.Wm82.a2.v1	64	80	52	48.3841	29	19	41	1.10642	0.000300319	0.00298535	up	yes	chrChr16:3593536-3595987:+	gi|356560367|ref|XP_003548464.1|	2709	0	PREDICTED: ankyrin-3-like [Glycine max]
Glyma.16G038900.Wm82.a2.v1	2475	2700	2348	1614.94	627	571	664	2.135	1.13464e-62	5.69673e-60	up	yes	chrChr16:3666547-3676052:+	gi|356560879|ref|XP_003548714.1|	5228	0	PREDICTED: uncharacterized protein LOC100814063 isoform X1 [Glycine max]
Glyma.16G039800.Wm82.a2.v1	1941	2173	1607	1368.82	1041	689	591	1.38627	6.2924e-12	3.20227e-10	up	yes	chrChr16:3730538-3733668:-	gi|571525509|ref|XP_003548726.2|	628	1e-70	PREDICTED: DNA ligase 1-like isoformX1 [Glycine max]
Glyma.16G042100.Wm82.a2.v1	3	20	15	6.98317	1	0	1	1.51548	0.000297407	0.00296134	up	yes	chrChr16:3931670-3933390:-	gi|571530636|ref|XP_006599775.1|	414	5e-47	PREDICTED: uncharacterized protein LOC102660023 [Glycine max]
Glyma.16G042200.Wm82.a2.v1	80	75	74	57.1905	37	36	35	1.13028	8.16333e-06	0.000131832	up	yes	chrChr16:3933842-3940818:+	gi|356560967|ref|XP_003548757.1|	1335	0	PREDICTED: uncharacterized protein LOC100810482 [Glycine max]
Glyma.16G042700.Wm82.a2.v1	522	419	289	304.62	245	184	135	1.18135	1.13825e-06	2.24425e-05	up	yes	chrChr16:3982381-3984873:-	gi|356560979|ref|XP_003548763.1|	1451	0	PREDICTED: thioredoxin-like 1-1, chloroplastic-like [Glycine max]
Glyma.16G043200.Wm82.a2.v1	1904	1376	1382	955.671	281	378	201	2.42269	9.75199e-29	1.63208e-26	up	yes	chrChr16:4037637-4039984:-	gi|734433544|gb|KHN46799.1|	1848	0	NAC domain-containing protein 29 [Glycine soja]
Glyma.16G043300.Wm82.a2.v1	13752	16429	14812	11528.7	6770	8083	8238	1.10242	4.65849e-16	3.70465e-14	up	yes	chrChr16:4059536-4066000:-	gi|356560997|ref|XP_003548772.1|	2421	0	PREDICTED: nucleoside-triphosphatase-like [Glycine max]
Glyma.16G043400.Wm82.a2.v1	303	183	275	159.257	44	58	59	2.19703	5.44422e-20	6.08432e-18	up	yes	chrChr16:4075555-4080995:-	gi|356561001|ref|XP_003548774.1|	2309	0	PREDICTED: nucleoside-triphosphatase-like [Glycine max]
Glyma.16G048000.Wm82.a2.v1	36	45	54	24.5356	2	3	0	3.06418	3.14811e-15	2.31727e-13	up	yes	chrChr16:4565311-4567636:-	gi|734433594|gb|KHN46849.1|	197	3e-16	hypothetical protein glysoja_015100 [Glycine soja]
Glyma.16G048700.Wm82.a2.v1	2827	3000	3023	2203.22	1301	1340	1489	1.24485	1.71891e-25	2.56988e-23	up	yes	chrChr16:4677004-4684708:+	gi|734308247|gb|KHM99214.1|	3297	0	RING finger protein 10 [Glycine soja]
Glyma.16G051300.Wm82.a2.v1	162	251	265	162.651	112	90	76	1.33736	9.16241e-09	2.72274e-07	up	yes	chrChr16:4923435-4935752:+	gi|356560448|ref|XP_003548504.1|	3254	0	PREDICTED: acyltransferase-like protein At3g26840, chloroplastic-like [Glycine max]
Glyma.16G053300.Wm82.a2.v1	191	77	107	90.4675	59	39	58	1.22272	5.27576e-05	0.00068814	up	yes	chrChr16:5180282-5183019:-	gi|356561604|ref|XP_003549071.1|	2331	0	PREDICTED: omega-hydroxypalmitate O-feruloyl transferase-like [Glycine max]
Glyma.16G054700.Wm82.a2.v1	32	24	27	20.2596	8	17	11	1.03459	0.00441698	0.0270495	up	yes	chrChr16:5396936-5397658:+	gi|356561768|ref|XP_003549150.1|	594	4e-75	PREDICTED: uncharacterized protein LOC100805879 [Glycine max]
Glyma.16G058100.Wm82.a2.v1	38	27	33	66.2758	127	101	86	-1.33813	4.59031e-07	9.75448e-06	down	yes	chrChr16:5685464-5692098:+	gi|356558723|ref|XP_003547652.1|	2052	0	PREDICTED: triacylglycerol lipase 2-like [Glycine max]
Glyma.16G073300.Wm82.a2.v1	244	180	210	348.061	512	472	529	-1.03865	4.24265e-10	1.61264e-08	down	yes	chrChr16:7395155-7396911:+	gi|734392036|gb|KHN27527.1|	241	2e-21	hypothetical protein glysoja_018639 [Glycine soja]
Glyma.16G075800.Wm82.a2.v1	48	57	61	38.89	24	19	19	1.36044	4.68202e-06	7.95046e-05	up	yes	chrChr16:7646131-7651379:+	gi|356558882|ref|XP_003547731.1|	2076	0	PREDICTED: protein notum homolog isoform X1 [Glycine max]
Glyma.16G077400.Wm82.a2.v1	222	177	164	123.38	52	60	43	1.8721	1.74304e-16	1.47949e-14	up	yes	chrChr16:7949438-7951155:+	gi|356558904|ref|XP_003547742.1|	942	2e-121	PREDICTED: uncharacterized protein LOC100783043 [Glycine max]
Glyma.16G085600.Wm82.a2.v1	4532	4248	3955	2292.8	106	157	62	5.0155	1.27913e-105	1.22939e-102	up	yes	chrChr16:10120976-10122362:-	gi|356560703|ref|XP_003548628.1|	1599	0	PREDICTED: uncharacterized protein LOC100805677 [Glycine max]
Glyma.16G093900.Wm82.a2.v1	235	265	190	173.354	107	134	91	1.14242	8.03912e-08	1.98261e-06	up	yes	chrChr16:15240450-15247799:-	gi|571527044|ref|XP_006599187.1|	4001	0	PREDICTED: G-type lectin S-receptor-like serine/threonine-protein kinase At1g11330-like isoform X1 [Glycine max]
Glyma.16G096500.Wm82.a2.v1	134	84	55	66.4191	34	52	31	1.15948	0.000237123	0.00244981	up	yes	chrChr16:18526185-18532443:+	gi|356559159|ref|XP_003547868.1|	2847	0	PREDICTED: CTP synthase 1-like isoform X1 [Glycine max]
Glyma.16G120300.Wm82.a2.v1	30	35	62	26.0831	12	3	9	1.83449	1.22476e-06	2.39811e-05	up	yes	chrChr16:26830987-26834111:+	gi|356561096|ref|XP_003548821.1|	1948	0	PREDICTED: GDSL esterase/lipase 6-like [Glycine max]
Glyma.16G124700.Wm82.a2.v1	28	22	24	51.785	87	87	74	-1.38533	3.71803e-07	8.11095e-06	down	yes	chrChr16:27440439-27442969:-	gi|356559262|ref|XP_003547919.1|	2374	0	PREDICTED: uncharacterized protein LOC100788369 [Glycine max]
Glyma.16G126400.Wm82.a2.v1	16	21	42	57.6305	101	85	94	-1.39742	4.45781e-06	7.60812e-05	down	yes	chrChr16:27765140-27775794:+	gi|356561136|ref|XP_003548841.1|	5298	0	PREDICTED: lysosomal alpha-mannosidase-like [Glycine max]
Glyma.16G127900.Wm82.a2.v1	251	523	194	246.703	180	183	127	1.00036	0.000463706	0.00428399	up	yes	chrChr16:28004128-28012396:+	gi|356559997|ref|XP_003548282.1|	5241	0	PREDICTED: TMV resistance protein N [Glycine max]
Glyma.16G128800.Wm82.a2.v1	45	38	20	85.7463	171	145	117	-1.66354	1.93443e-09	6.54652e-08	down	yes	chrChr16:28110324-28112473:+	gi|359807175|ref|NP_001241612.1|	1597	0	uncharacterized protein LOC100799995 [Glycine max]
Glyma.16G131200.Wm82.a2.v1	60	56	133	60.9173	24	56	29	1.07542	0.00172156	0.0125895	up	yes	chrChr16:28550384-28555969:-	gi|356559331|ref|XP_003547953.1|	2616	0	PREDICTED: cytochrome P450 84A1-like [Glycine max]
Glyma.16G135200.Wm82.a2.v1	9	17	6	6.55589	4	0	2	1.11591	0.00812393	0.043957	up	yes	chrChr16:29255829-29266445:-	gi|571528181|ref|XP_006599369.1|	5640	0	PREDICTED: TMV resistance protein N-like [Glycine max]
Glyma.16G136600.Wm82.a2.v1	3147	3743	1924	2187.84	1552	1228	1299	1.19915	1.15596e-08	3.38722e-07	up	yes	chrChr16:29363327-29374233:-	gi|571528161|ref|XP_006599364.1|	7276	0	PREDICTED: TMV resistance protein N isoform X1 [Glycine max]
Glyma.16G137000.Wm82.a2.v1	134	191	44	85.3283	60	35	36	1.30017	0.000199272	0.00211594	up	yes	chrChr16:29418205-29421765:-	gi|571528202|ref|XP_006599373.1|	2958	0	PREDICTED: TMV resistance protein N-like [Glycine max]
Glyma.16G137600.Wm82.a2.v1	484	783	274	389.5	278	216	265	1.05366	0.000104268	0.00123316	up	yes	chrChr16:29468438-29472890:-	gi|356561225|ref|XP_003548883.1|	5448	0	PREDICTED: TMV resistance protein N-like [Glycine max]
Glyma.16G141200.Wm82.a2.v1	156	183	189	117.409	66	47	44	1.77501	2.48671e-15	1.85478e-13	up	yes	chrChr16:29911174-29916916:+	gi|571528301|ref|XP_006599388.1|	1905	0	PREDICTED: probable protein phosphatase 2C 55-like isoform X4 [Glycine max]
Glyma.16G142100.Wm82.a2.v1	292	290	382	205.56	104	76	50	2.04599	7.27891e-18	6.80153e-16	up	yes	chrChr16:30045141-30049963:+	gi|571528326|ref|XP_003548898.2|	1837	0	PREDICTED: uncharacterized protein LOC100809065 [Glycine max]
Glyma.16G142200.Wm82.a2.v1	299	335	297	225.402	137	128	129	1.35535	3.35668e-16	2.73403e-14	up	yes	chrChr16:30067119-30068542:-	gi|356561257|ref|XP_003548899.1|	1053	5e-139	PREDICTED: uncharacterized protein LOC100810676 [Glycine max]
Glyma.16G144900.Wm82.a2.v1	183	48	87	69.201	38	20	26	1.6167	4.86509e-06	8.23638e-05	up	yes	chrChr16:30549575-30553059:+	gi|358248184|ref|NP_001240089.1|	1921	0	uncharacterized protein LOC100795221 precursor [Glycine max]
Glyma.16G151200.Wm82.a2.v1	45	41	47	92.554	180	134	129	-1.42799	1.54683e-09	5.32042e-08	down	yes	chrChr16:31173115-31175417:-	gi|356559528|ref|XP_003548051.1|	1570	0	PREDICTED: syntaxin-related protein KNOLLE-like [Glycine max]
Glyma.16G152100.Wm82.a2.v1	158	207	202	144.113	109	100	75	1.0892	3.26059e-07	7.20651e-06	up	yes	chrChr16:31264479-31266877:+	gi|571528614|ref|XP_006599428.1|	2017	0	PREDICTED: NAC domain-containing protein 100 [Glycine max]
Glyma.16G154300.Wm82.a2.v1	205	253	244	179.617	130	132	97	1.07403	4.07871e-08	1.07949e-06	up	yes	chrChr16:31472047-31475600:-	gi|571524013|ref|XP_006598729.1|	1445	0	PREDICTED: uncharacterized protein LOC100781076 isoform X1 [Glycine max]
Glyma.16G155100.Wm82.a2.v1	139	96	165	236.346	589	244	233	-1.05978	0.000332875	0.00324191	down	yes	chrChr16:31522889-31524889:-	gi|356559569|ref|XP_003548071.1|	1413	0	PREDICTED: aquaporin PIP2-2-like [Glycine max]
Glyma.16G156600.Wm82.a2.v1	13	10	8	19.206	31	27	30	-1.01101	0.00497024	0.0297498	down	yes	chrChr16:31673196-31676637:-	gi|351726130|ref|NP_001237116.1|	703	4e-89	uncharacterized protein LOC100527513 [Glycine max]
Glyma.16G162400.Wm82.a2.v1	142	34	41	45.2007	10	22	12	1.703	1.16695e-05	0.000182039	up	yes	chrChr16:32138248-32142967:-	gi|356530375|ref|XP_003533757.1|	2354	0	PREDICTED: tryptophan aminotransferase-related protein 4 [Glycine max]
Glyma.16G166600.Wm82.a2.v1	477	744	686	459.02	236	326	228	1.34862	6.42119e-11	2.79796e-09	up	yes	chrChr16:32589393-32591093:+	gi|351723461|ref|NP_001235744.1|	313	1e-32	uncharacterized protein LOC100305719 [Glycine max]
Glyma.16G168200.Wm82.a2.v1	352	399	261	234.405	58	163	138	1.44821	2.9718e-07	6.65568e-06	up	yes	chrChr16:32810792-32812082:-	gi|356559667|ref|XP_003548120.1|	1040	5e-138	PREDICTED: vacuolar iron transporter homolog 2-like [Glycine max]
Glyma.16G176800.Wm82.a2.v1	16	122	121	55.9363	31	24	12	1.41566	0.000355899	0.00342647	up	yes	chrChr16:33813025-33817184:+	gi|571529286|ref|XP_006599541.1|	5287	0	PREDICTED: LRR receptor-like serine/threonine-protein kinase GSO1-like isoform X1 [Glycine max]
Glyma.16G176900.Wm82.a2.v1	1	38	10	9.21436	1	0	3	1.19834	0.00346671	0.0222593	up	yes	chrChr16:33828244-33834767:+	gi|571529278|ref|XP_006599539.1|	5240	0	PREDICTED: LRR receptor-like serine/threonine-protein kinase GSO1-like isoform X2 [Glycine max]
Glyma.16G178000.Wm82.a2.v1	694	1415	760	695.391	466	460	297	1.26605	3.63626e-07	7.95838e-06	up	yes	chrChr16:33901523-33902676:-	gi|734340258|gb|KHN09290.1|	644	5e-82	hypothetical protein glysoja_029061 [Glycine soja]
Glyma.16G178100.Wm82.a2.v1	15	33	12	13.3688	4	11	3	1.13001	0.00626689	0.0357793	up	yes	chrChr16:33905054-33906076:-	gi|356561506|ref|XP_003549022.1|	548	3e-68	PREDICTED: uncharacterized protein LOC100800008 [Glycine max]
Glyma.16G178400.Wm82.a2.v1	39	59	37	30.1494	17	18	6	1.45261	4.12469e-05	0.000556114	up	yes	chrChr16:33925885-33926970:-	gi|734340261|gb|KHN09293.1|	529	1e-64	hypothetical protein glysoja_029064 [Glycine soja]
Glyma.16G178500.Wm82.a2.v1	705	1222	817	695.61	475	559	329	1.08685	1.69594e-06	3.21407e-05	up	yes	chrChr16:33929578-33930566:-	gi|356559740|ref|XP_003548155.1|	445	8e-53	PREDICTED: uncharacterized protein LOC100783411 [Glycine max]
Glyma.16G178900.Wm82.a2.v1	124	298	312	186.114	114	143	108	1.03059	0.000216186	0.00226692	up	yes	chrChr16:33954446-33960344:+	gi|356561516|ref|XP_003549027.1|	1629	0	PREDICTED: glutaminyl-peptide cyclotransferase-like isoform X1 [Glycine max]
Glyma.16G180200.Wm82.a2.v1	40	22	13	17.4253	12	3	12	1.05453	0.00914044	0.0482541	up	yes	chrChr16:34077613-34081734:+	gi|734340279|gb|KHN09311.1|	2645	0	Protein TRANSPARENT TESTA 12 [Glycine soja]
Glyma.16G180300.Wm82.a2.v1	21	16	22	37.0066	47	77	46	-1.11737	0.000501061	0.00456656	down	yes	chrChr16:34086273-34087501:+	gi|356561526|ref|XP_003549032.1|	1017	2e-134	PREDICTED: uncharacterized protein LOC100805876 [Glycine max]
Glyma.16G180400.Wm82.a2.v1	60	1838	1582	621.448	14	22	32	1.39093	0.000543759	0.00490126	up	yes	chrChr16:34093033-34094634:+	gi|356559764|ref|XP_003548167.1|	1086	3e-143	PREDICTED: uncharacterized protein LOC100790144 [Glycine max]
Glyma.16G181900.Wm82.a2.v1	28	27	26	47.9363	94	50	72	-1.06103	0.00034768	0.00336177	down	yes	chrChr16:34273307-34278810:-	gi|571529469|ref|XP_003549039.2|	3649	0	PREDICTED: kinesin-like protein KIF22-like [Glycine max]
Glyma.16G182400.Wm82.a2.v1	89	60	71	56.0983	39	39	33	1.02574	0.000142304	0.00160367	up	yes	chrChr16:34323618-34328331:-	gi|356559792|ref|XP_003548181.1|	5133	0	PREDICTED: protein NLP7-like [Glycine max]
Glyma.16G199000.Wm82.a2.v1	12	53	20	18.3655	7	10	5	1.32039	0.00118036	0.00926628	up	yes	chrChr16:36041529-36042937:+	gi|525507429|ref|NP_001267504.1|	908	2e-117	uncharacterized protein LOC100819565 [Glycine max]
Glyma.16G200100.Wm82.a2.v1	785	641	408	337.382	24	34	34	4.02093	1.78727e-56	7.61038e-54	up	yes	chrChr16:36120597-36123004:+	gi|571529859|ref|XP_006599637.1|	3222	0	PREDICTED: uncharacterized protein LOC100790494 [Glycine max]
Glyma.16G203100.Wm82.a2.v1	81	45	59	44.9617	22	31	26	1.18222	0.000106912	0.00125837	up	yes	chrChr16:36416105-36417800:-	gi|356559911|ref|XP_003548239.1|	413	7e-48	PREDICTED: CDGSH iron-sulfur domain-containing protein NEET-like [Glycine max]
Glyma.16G209500.Wm82.a2.v1	110	112	178	97.2474	67	47	58	1.24814	1.07372e-06	2.12714e-05	up	yes	chrChr16:36885484-36892756:+	gi|571530089|ref|XP_006599666.1|	1593	0	PREDICTED: uncharacterized protein LOC100811743 isoform X2 [Glycine max]
Glyma.16G211900.Wm82.a2.v1	8	11	6	16.4496	18	25	34	-1.02413	0.007592	0.041554	down	yes	chrChr16:37050957-37052863:+	gi|571531843|ref|XP_006600103.1|	2692	0	PREDICTED: pentatricopeptide repeat-containing protein At2g29760, chloroplastic-like [Glycine max]
Glyma.16G215600.Wm82.a2.v1	21	60	37	28.5604	12	18	20	1.06022	0.00349749	0.0224142	up	yes	chrChr16:37292073-37296192:+	gi|571530262|ref|XP_006599706.1|	1313	4e-178	PREDICTED: probable ADP-ribosylation factor GTPase-activating protein AGD15-like isoform X1 [Glycine max]
Glyma.16G218700.Wm82.a2.v1	71	74	56	117.507	190	141	195	-1.1233	4.84448e-07	1.02493e-05	down	yes	chrChr16:37608196-37613873:+	gi|356560075|ref|XP_003548321.1|	2717	0	PREDICTED: DNA polymerase epsilon subunit 2-like [Glycine max]
Glyma.16G220700.Wm82.a2.v1	4	5	0	10.2999	29	10	17	-1.26193	0.00275214	0.0184531	down	yes	chrChr16:37774284-37778867:+	gi|356560099|ref|XP_003548333.1|	1277	1e-174	PREDICTED: acid phosphatase 1-like [Glycine max]
Glyma.17G005000.Wm82.a2.v1	31	55	41	27.5001	7	12	14	1.62919	3.65472e-06	6.36671e-05	up	yes	chrChr17:477553-479246:-	gi|734319514|gb|KHN03554.1|	1271	6e-174	U-box domain-containing protein 35 [Glycine soja]
Glyma.17G005900.Wm82.a2.v1	57	22	47	28.7893	10	17	15	1.32521	0.000250015	0.00256489	up	yes	chrChr17:546212-548525:+	gi|351722687|ref|NP_001235461.1|	934	4e-125	uncharacterized protein LOC100527138 precursor [Glycine max]
Glyma.17G007400.Wm82.a2.v1	12	15	13	39.6588	82	59	68	-1.85029	2.1688e-09	7.28833e-08	down	yes	chrChr17:630066-634738:-	gi|356562501|ref|XP_003549509.1|	887	1e-116	PREDICTED: CASP-like protein RCOM_0864260-like [Glycine max]
Glyma.17G009500.Wm82.a2.v1	23	22	28	42.8643	63	68	61	-1.06448	0.000174206	0.00189037	down	yes	chrChr17:764970-769687:-	gi|356564470|ref|XP_003550477.1|	2924	0	PREDICTED: EH domain-containing protein 1-like [Glycine max]
Glyma.17G012200.Wm82.a2.v1	62	68	73	138.223	211	182	263	-1.41377	5.42713e-11	2.39584e-09	down	yes	chrChr17:945465-949232:-	gi|356563026|ref|XP_003549767.1|	3378	0	PREDICTED: U3 small nucleolar RNA-associated protein 6 homolog [Glycine max]
Glyma.17G012300.Wm82.a2.v1	147	150	205	273.817	416	395	376	-1.01911	1.34511e-08	3.88731e-07	down	yes	chrChr17:950397-955232:-	gi|356563035|ref|XP_003549771.1|	2862	0	PREDICTED: L-ascorbate oxidase homolog [Glycine max]
Glyma.17G013300.Wm82.a2.v1	9	4	8	15.3885	33	13	29	-1.09731	0.00581678	0.0338005	down	yes	chrChr17:1013849-1016359:-	gi|356564492|ref|XP_003550488.1|	921	9e-117	PREDICTED: uncharacterized protein LOC100810697 isoform X1 [Glycine max]
Glyma.17G013400.Wm82.a2.v1	35	17	30	55.2512	90	101	70	-1.28436	1.2932e-05	0.000198639	down	yes	chrChr17:1021469-1024766:-	gi|571532777|ref|XP_006600310.1|	3704	0	PREDICTED: uncharacterized protein LOC100811239 [Glycine max]
Glyma.17G019300.Wm82.a2.v1	2314	2482	3521	1996.75	1030	1249	1129	1.38991	5.28364e-15	3.82483e-13	up	yes	chrChr17:1447243-1450323:+	gi|351721496|ref|NP_001237211.1|	3350	0	copper amino oxidase precursor [Glycine max]
Glyma.17G020600.Wm82.a2.v1	11	12	16	8.11953	1	4	3	1.30722	0.00184879	0.0133601	up	yes	chrChr17:1526486-1534419:+	gi|356564561|ref|XP_003550521.1|	4935	0	PREDICTED: pyruvate, phosphate dikinase, chloroplastic-like isoform X1 [Glycine max]
Glyma.17G025400.Wm82.a2.v1	229	249	224	182.471	113	103	161	1.00113	1.05257e-06	2.08894e-05	up	yes	chrChr17:1862060-1864647:+	gi|571533034|ref|XP_003550226.2|	1762	0	PREDICTED: protein will die slowly-like [Glycine max]
Glyma.17G027900.Wm82.a2.v1	6	18	13	6.50118	0	0	0	1.83806	1.17386e-05	0.000182812	up	yes	chrChr17:2085066-2087848:-	gi|356564601|ref|XP_003550540.1|	2167	0	PREDICTED: MATE efflux family protein 5-like [Glycine max]
Glyma.17G028400.Wm82.a2.v1	17	24	21	14.4886	12	6	5	1.0993	0.00488926	0.0293591	up	yes	chrChr17:2117546-2118737:+	gi|356564603|ref|XP_003550541.1|	902	2e-117	PREDICTED: RING-H2 finger protein ATL2-like [Glycine max]
Glyma.17G030000.Wm82.a2.v1	280	269	209	193.034	128	170	83	1.05813	1.24255e-05	0.000192441	up	yes	chrChr17:2203480-2204578:-	gi|734319289|gb|KHN03329.1|	842	1e-110	Pathogenesis-related protein STH-2 [Glycine soja]
Glyma.17G030800.Wm82.a2.v1	16	16	21	36.4983	70	62	42	-1.27789	5.55067e-05	0.000716514	down	yes	chrChr17:2264697-2265688:+	gi|571540076|ref|XP_006601396.1|	158	3e-10	PREDICTED: leucine-rich repeat extensin-like protein 1-like [Glycine max]
Glyma.17G031800.Wm82.a2.v1	246	245	271	166.466	72	64	71	1.94436	4.63356e-25	6.71846e-23	up	yes	chrChr17:2331626-2336016:-	gi|356564634|ref|XP_003550556.1|	3026	0	PREDICTED: acetate/butyrate--CoA ligase AAE7, peroxisomal-like [Glycine max]
Glyma.17G035400.Wm82.a2.v1	565	583	396	391.808	263	277	228	1.11838	2.06673e-09	6.96622e-08	up	yes	chrChr17:2596220-2599345:+	gi|571533331|ref|XP_006600381.1|	1180	2e-153	PREDICTED: probable WRKY transcription factor 48-like isoform X2 [Glycine max]
Glyma.17G036800.Wm82.a2.v1	258	266	203	131.244	7	5	9	4.48051	3.87369e-55	1.53302e-52	up	yes	chrChr17:2691257-2692110:+	gi|356565405|ref|XP_003550931.1|	763	2e-99	PREDICTED: uncharacterized protein LOC100816575 [Glycine max]
Glyma.17G038600.Wm82.a2.v1	25	20	32	44.2996	79	54	64	-1.01305	0.000592302	0.00526267	down	yes	chrChr17:2855029-2856722:+	gi|734319207|gb|KHN03247.1|	1359	0	hypothetical protein glysoja_004273 [Glycine soja]
Glyma.17G038700.Wm82.a2.v1	2702	2537	2132	1872.47	1258	778	1646	1.08857	7.81821e-07	1.59007e-05	up	yes	chrChr17:2861665-2874082:+	gi|571533448|ref|XP_006600398.1|	10821	0	PREDICTED: phragmoplast orienting kinesin 1-like [Glycine max]
Glyma.17G041200.Wm82.a2.v1	131	23	25	38.6581	16	25	4	1.27326	0.00213423	0.0150195	up	yes	chrChr17:3041792-3047638:+	gi|356564678|ref|XP_003550577.1|	6030	0	PREDICTED: ABC transporter B family member 11-like [Glycine max]
Glyma.17G044300.Wm82.a2.v1	196	158	161	308.891	527	482	388	-1.20584	2.6485e-11	1.24605e-09	down	yes	chrChr17:3285534-3295066:-	gi|356565590|ref|XP_003551022.1|	5531	0	PREDICTED: alpha-aminoadipic semialdehyde synthase-like [Glycine max]
Glyma.17G046700.Wm82.a2.v1	508	606	628	310.752	8	8	11	5.46134	8.64045e-102	7.64884e-99	up	yes	chrChr17:3494399-3495286:+	gi|734365367|gb|KHN17746.1|	665	2e-84	hypothetical protein glysoja_005943 [Glycine soja]
Glyma.17G047300.Wm82.a2.v1	25	24	6	11.8662	7	5	2	1.19533	0.00427246	0.0263129	up	yes	chrChr17:3577749-3578941:+	gi|351721764|ref|NP_001238500.1|	914	6e-120	dehydration-responsive element binding protein 3 [Glycine max]
Glyma.17G049900.Wm82.a2.v1	177	278	252	162.095	110	78	54	1.54786	9.47254e-10	3.37192e-08	up	yes	chrChr17:3785988-3788223:-	gi|356565802|ref|XP_003551126.1|	2051	0	PREDICTED: 12-oxophytodienoate reductase 3-like [Glycine max]
Glyma.17G050400.Wm82.a2.v1	56	48	78	107.96	141	219	125	-1.10379	3.61021e-05	0.000495285	down	yes	chrChr17:3829126-3833347:+	gi|356564766|ref|XP_003550619.1|	1210	1e-160	PREDICTED: uncharacterized protein LOC100802173 [Glycine max]
Glyma.17G053000.Wm82.a2.v1	536	550	789	1160.3	1725	1890	1696	-1.27426	8.85888e-14	5.63334e-12	down	yes	chrChr17:4035438-4038178:+	gi|356561903|ref|XP_003549216.1|	1493	0	PREDICTED: peroxidase N-like [Glycine max]
Glyma.17G053600.Wm82.a2.v1	82	64	30	42.3936	32	27	14	1.12295	0.00135195	0.0103737	up	yes	chrChr17:4076879-4080511:-	gi|356561925|ref|XP_003549227.1|	2641	0	PREDICTED: uncharacterized protein LOC100776993 [Glycine max]
Glyma.17G057600.Wm82.a2.v1	233	192	214	157.291	75	117	94	1.23931	5.87523e-09	1.8049e-07	up	yes	chrChr17:4356268-4360375:-	gi|356562028|ref|XP_003549277.1|	1615	0	PREDICTED: plant intracellular Ras-group-related LRR protein 6-like [Glycine max]
Glyma.17G059700.Wm82.a2.v1	849	920	849	614.988	326	303	358	1.53604	5.17683e-29	8.75092e-27	up	yes	chrChr17:4518026-4523412:-	gi|571534037|ref|XP_006600480.1|	4350	0	PREDICTED: uncharacterized protein LOC100818700 [Glycine max]
Glyma.17G064300.Wm82.a2.v1	41	25	27	17.6382	2	3	3	2.35506	2.5135e-09	8.34057e-08	up	yes	chrChr17:4947304-4948143:-	gi|356562451|ref|XP_003549485.1|	708	2e-91	PREDICTED: uncharacterized protein LOC100798434 [Glycine max]
Glyma.17G065300.Wm82.a2.v1	59	200	51	72.7736	24	52	41	1.16719	0.00153519	0.0115042	up	yes	chrChr17:5041276-5042804:+	gi|571534195|ref|XP_003549490.2|	1464	0	PREDICTED: probable xyloglucan endotransglucosylase/hydrolase protein 23-like [Glycine max]
Glyma.17G065700.Wm82.a2.v1	896	829	735	572.368	315	230	347	1.5616	9.37747e-19	9.53017e-17	up	yes	chrChr17:5069362-5075754:+	gi|571534214|ref|XP_003550663.2|	5714	0	PREDICTED: uncharacterized protein LOC100782903 isoform X1 [Glycine max]
Glyma.17G065800.Wm82.a2.v1	636	713	328	421.048	319	195	293	1.10478	1.43404e-05	0.000218278	up	yes	chrChr17:5082198-5084006:+	gi|571534221|ref|XP_006600502.1|	1837	0	PREDICTED: transcription factor RAX1-like [Glycine max]
Glyma.17G066800.Wm82.a2.v1	13	13	22	9.70195	1	2	5	1.49154	0.000363318	0.00348791	up	yes	chrChr17:5166519-5168804:-	gi|356564872|ref|XP_003550671.1|	1973	0	PREDICTED: PTI1-like tyrosine-protein kinase At3g15890-like [Glycine max]
Glyma.17G067200.Wm82.a2.v1	55	56	77	44.68	22	40	12	1.2122	0.000319141	0.00313631	up	yes	chrChr17:5203358-5205507:+	gi|734365180|gb|KHN17559.1|	2465	0	Glutamate receptor 2.5 [Glycine soja]
Glyma.17G067800.Wm82.a2.v1	285	241	307	206.926	118	182	85	1.16462	1.99211e-06	3.72706e-05	up	yes	chrChr17:5288105-5291690:-	gi|734365172|gb|KHN17551.1|	4524	0	Putative alpha,alpha-trehalose-phosphate synthase [UDP-forming] 11 [Glycine soja]
Glyma.17G069200.Wm82.a2.v1	517	464	304	311.825	173	234	140	1.28583	3.71982e-08	9.90176e-07	up	yes	chrChr17:5429125-5431421:+	gi|356562516|ref|XP_003549516.1|	1636	0	PREDICTED: LOW QUALITY PROTEIN: WAT1-related protein At4g28040-like [Glycine max]
Glyma.17G069300.Wm82.a2.v1	30	49	50	31.5743	27	17	13	1.07937	0.00140196	0.0106819	up	yes	chrChr17:5440359-5443054:-	gi|356562521|ref|XP_003549518.1|	1218	2e-164	PREDICTED: tetraspanin-8 [Glycine max]
Glyma.17G069500.Wm82.a2.v1	23	24	23	16.4006	3	11	12	1.10369	0.00451501	0.0274947	up	yes	chrChr17:5454120-5454965:+	gi|734365155|gb|KHN17534.1|	170	2e-12	hypothetical protein glysoja_005731 [Glycine soja]
Glyma.17G069600.Wm82.a2.v1	2956	3886	2993	2497.69	1409	1971	1524	1.12184	8.46623e-11	3.61402e-09	up	yes	chrChr17:5461486-5464106:+	gi|356562525|ref|XP_003549520.1|	2315	0	PREDICTED: UDP-glucuronate 4-epimerase 1-like [Glycine max]
Glyma.17G070800.Wm82.a2.v1	35	21	27	19.1456	13	8	8	1.24602	0.000759474	0.0064659	up	yes	chrChr17:5546050-5549115:-	gi|356564882|ref|XP_003550676.1|	1576	0	PREDICTED: AP2-like ethylene-responsive transcription factor At1g16060-like [Glycine max]
Glyma.17G071300.Wm82.a2.v1	95	143	157	100.914	68	86	47	1.01744	0.00012671	0.00145723	up	yes	chrChr17:5573671-5577724:+	gi|571534380|ref|XP_006600521.1|	2549	0	PREDICTED: uncharacterized protein LOC100791924 [Glycine max]
Glyma.17G074300.Wm82.a2.v1	57	49	64	41.5173	20	33	21	1.16391	0.000112699	0.00131586	up	yes	chrChr17:5823207-5825262:+	gi|356562579|ref|XP_003549547.1|	2057	0	PREDICTED: BTB/POZ domain-containing protein At2g24240-like [Glycine max]
Glyma.17G075300.Wm82.a2.v1	155	113	103	94.8639	68	56	65	1.04607	1.14469e-05	0.000178933	up	yes	chrChr17:5908293-5912735:-	gi|356562585|ref|XP_003549550.1|	2540	0	PREDICTED: NADP-dependent glyceraldehyde-3-phosphate dehydrogenase-like [Glycine max]
Glyma.17G076900.Wm82.a2.v1	143	169	163	120.789	79	85	74	1.09728	5.175e-08	1.32988e-06	up	yes	chrChr17:6012041-6014555:-	gi|571534630|ref|XP_006600569.1|	2730	0	PREDICTED: zinc finger protein ZAT4-like isoform X1 [Glycine max]
Glyma.17G086800.Wm82.a2.v1	445	403	316	238.866	66	72	79	2.4391	3.29221e-34	6.83622e-32	up	yes	chrChr17:6703100-6706716:+	gi|356564970|ref|XP_003550718.1|	1795	0	PREDICTED: short-chain dehydrogenase TIC 32, chloroplastic-like [Glycine max]
Glyma.17G088500.Wm82.a2.v1	261	280	333	224.079	172	136	142	1.07489	3.77055e-09	1.20913e-07	up	yes	chrChr17:6867574-6872100:+	gi|356564996|ref|XP_003550731.1|	1829	0	PREDICTED: triose phosphate/phosphate translocator, non-green plastid, chloroplastic-like [Glycine max]
Glyma.17G098600.Wm82.a2.v1	477	558	479	835.009	1068	1329	1238	-1.05847	1.20452e-12	6.75312e-11	down	yes	chrChr17:7779339-7780765:-	gi|356562820|ref|XP_003549666.1|	944	7e-125	PREDICTED: 40S ribosomal protein S9-2-like [Glycine max]
Glyma.17G100800.Wm82.a2.v1	274	67	101	98.8187	34	46	53	1.4823	2.32886e-05	0.000335794	up	yes	chrChr17:7926190-7929352:+	gi|356562848|ref|XP_003549680.1|	1879	0	PREDICTED: GDSL esterase/lipase At1g74460-like [Glycine max]
Glyma.17G101000.Wm82.a2.v1	158	196	208	140.907	94	82	93	1.16043	7.4017e-09	2.23908e-07	up	yes	chrChr17:7937950-7941204:+	gi|356562852|ref|XP_003549682.1|	2169	0	PREDICTED: cyclic dof factor 3 [Glycine max]
Glyma.17G103200.Wm82.a2.v1	41	38	40	29.9999	24	17	17	1.00455	0.00150477	0.0113318	up	yes	chrChr17:8096158-8099747:+	gi|734367932|gb|KHN18578.1|	798	1e-103	Hypothetical protein glysoja_006991 [Glycine soja]
Glyma.17G103300.Wm82.a2.v1	80	33	57	29.969	0	0	0	3.67691	8.1659e-20	8.97688e-18	up	yes	chrChr17:8102348-8104754:+	gi|571535403|ref|XP_006600704.1|	2285	0	PREDICTED: WEB family protein At1g12150-like [Glycine max]
Glyma.17G105800.Wm82.a2.v1	342	317	351	198.065	57	24	49	2.85958	1.097e-33	2.20971e-31	up	yes	chrChr17:8293050-8296327:-	gi|356565135|ref|XP_003550800.1|	1900	0	PREDICTED: probable protein phosphatase 2C 27 [Glycine max]
Glyma.17G107800.Wm82.a2.v1	33	29	46	72.6145	112	106	125	-1.34453	1.16987e-07	2.81297e-06	down	yes	chrChr17:8462963-8465368:+	gi|356562928|ref|XP_003549720.1|	411	2e-45	PREDICTED: prostatic spermine-binding protein-like [Glycine max]
Glyma.17G108700.Wm82.a2.v1	2758	3580	3197	1793.26	243	266	231	3.73413	6.9762e-139	1.11749e-135	up	yes	chrChr17:8527140-8530377:+	gi|356562943|ref|XP_003549727.1|	2374	0	PREDICTED: monogalactosyldiacylglycerol synthase 2, chloroplastic-like isoform X1 [Glycine max]
Glyma.17G109300.Wm82.a2.v1	503	532	460	304.721	90	108	68	2.5177	7.57397e-40	1.91564e-37	up	yes	chrChr17:8561780-8563646:-	gi|351723667|ref|NP_001237031.1|	1685	0	uncharacterized protein LOC732564 [Glycine max]
Glyma.17G114300.Wm82.a2.v1	646	752	669	525.013	310	396	325	1.13147	6.28041e-13	3.62379e-11	up	yes	chrChr17:9049860-9050962:-	gi|571531922|ref|XP_006600125.1|	506	2e-60	PREDICTED: uncharacterized protein LOC100306355 isoform X1 [Glycine max]
Glyma.17G114700.Wm82.a2.v1	6415	6861	6006	3650.65	490	730	422	3.52331	1.62154e-76	1.02919e-73	up	yes	chrChr17:9074437-9077350:+	gi|356563013|ref|XP_003549761.1|	1444	0	PREDICTED: SPX domain-containing protein 2-like [Glycine max]
Glyma.17G115700.Wm82.a2.v1	145	194	166	120.558	65	53	85	1.3663	2.76219e-09	9.09173e-08	up	yes	chrChr17:9147302-9150438:-	gi|356565189|ref|XP_003550826.1|	3044	0	PREDICTED: DEAD-box ATP-dependent RNA helicase 52B [Glycine max]
Glyma.17G116700.Wm82.a2.v1	5	3	5	13.2025	26	6	38	-1.24427	0.00294333	0.019452	down	yes	chrChr17:9206095-9208694:-	gi|356565198|ref|XP_003550830.1|	1735	0	PREDICTED: zinc finger CCCH domain-containing protein 39-like [Glycine max]
Glyma.17G118200.Wm82.a2.v1	813	955	494	507.158	241	266	191	1.7213	3.16755e-14	2.14393e-12	up	yes	chrChr17:9337443-9339028:-	gi|358248696|ref|NP_001239669.1|	643	1e-78	uncharacterized protein LOC100780553 [Glycine max]
Glyma.17G118500.Wm82.a2.v1	89	67	47	46.3998	21	33	14	1.42298	1.4059e-05	0.000214384	up	yes	chrChr17:9376920-9378047:-	gi|351724325|ref|NP_001235774.1|	765	1e-99	uncharacterized protein LOC100306489 precursor [Glycine max]
Glyma.17G121900.Wm82.a2.v1	317	250	377	242.234	154	192	140	1.05706	3.04495e-07	6.78338e-06	up	yes	chrChr17:9763577-9764504:+	gi|356563111|ref|XP_003549809.1|	574	1e-70	PREDICTED: uncharacterized protein LOC100794201 [Glycine max]
Glyma.17G124900.Wm82.a2.v1	1096	1236	1511	995.339	626	755	659	1.04285	1.08082e-10	4.5165e-09	up	yes	chrChr17:9957180-9958799:+	gi|356563139|ref|XP_003549822.1|	975	3e-129	PREDICTED: high-affinity nitrate transporter 3.1-like [Glycine max]
Glyma.17G127300.Wm82.a2.v1	1	2	3	6.65708	19	6	11	-1.10841	0.00874142	0.046638	down	yes	chrChr17:10171247-10172479:+	gi|356563172|ref|XP_003549838.1|	789	5e-102	PREDICTED: uncharacterized protein LOC100811233 [Glycine max]
Glyma.17G128000.Wm82.a2.v1	17	25	20	37.9828	50	75	48	-1.09295	0.000494625	0.0045177	down	yes	chrChr17:10234685-10238418:+	gi|571536103|ref|XP_006600799.1|	3060	0	PREDICTED: malate synthase, glyoxysomal [Glycine max]
Glyma.17G128400.Wm82.a2.v1	262	284	187	472.452	693	596	909	-1.32425	9.68896e-11	4.069e-09	down	yes	chrChr17:10267423-10270869:-	gi|356563188|ref|XP_003549846.1|	2662	0	PREDICTED: nucleolar protein 56-like [Glycine max]
Glyma.17G128900.Wm82.a2.v1	77	221	115	83.0334	25	29	13	2.23124	2.94934e-11	1.37414e-09	up	yes	chrChr17:10330413-10331258:+	gi|356563192|ref|XP_003549848.1|	619	6e-78	PREDICTED: putative calcium-binding protein CML19-like [Glycine max]
Glyma.17G129700.Wm82.a2.v1	791	769	790	612.335	426	448	397	1.03206	3.73961e-15	2.74067e-13	up	yes	chrChr17:10388359-10391222:-	gi|356563200|ref|XP_003549852.1|	3230	0	PREDICTED: exocyst complex component EXO70B1-like [Glycine max]
Glyma.17G131200.Wm82.a2.v1	49	34	42	87.8421	190	134	98	-1.3906	3.91598e-07	8.48228e-06	down	yes	chrChr17:10508320-10511779:+	gi|356563218|ref|XP_003549861.1|	3366	0	PREDICTED: scarecrow-like protein 28-like isoform X1 [Glycine max]
Glyma.17G131900.Wm82.a2.v1	33	57	10	19.4605	4	7	1	1.79604	1.58587e-05	0.000238583	up	yes	chrChr17:10589957-10591031:+	gi|356565301|ref|XP_003550880.1|	1285	8e-176	PREDICTED: dehydration-responsive element-binding protein 1A-like [Glycine max]
Glyma.17G132400.Wm82.a2.v1	602	671	817	428.056	106	149	130	2.47411	1.07544e-39	2.69975e-37	up	yes	chrChr17:10636008-10637777:+	gi|356563230|ref|XP_003549867.1|	1804	0	PREDICTED: transcription factor TCP9-like [Glycine max]
Glyma.17G134700.Wm82.a2.v1	322	334	285	225.989	123	146	117	1.38894	5.46127e-15	3.93387e-13	up	yes	chrChr17:10842191-10847722:+	gi|363807348|ref|NP_001242374.1|	2121	0	uncharacterized protein LOC100789629 [Glycine max]
Glyma.17G135100.Wm82.a2.v1	91	104	63	59.0379	20	42	25	1.46976	1.30858e-06	2.5386e-05	up	yes	chrChr17:10870710-10872285:+	gi|356563266|ref|XP_003549885.1|	1128	9e-152	PREDICTED: uncharacterized protein LOC100790687 [Glycine max]
Glyma.17G141700.Wm82.a2.v1	35	15	39	79.427	149	144	115	-1.75186	9.79721e-10	3.48013e-08	down	yes	chrChr17:11523871-11527477:+	gi|356565355|ref|XP_003550907.1|	1913	0	PREDICTED: probable pectinesterase 68 [Glycine max]
Glyma.17G145300.Wm82.a2.v1	1162	895	781	689.867	511	486	220	1.25526	7.55727e-07	1.54386e-05	up	yes	chrChr17:11923829-11924939:-	gi|359807540|ref|NP_001241150.1|	1014	2e-134	ethylene-responsive transcription factor 5-like [Glycine max]
Glyma.17G149000.Wm82.a2.v1	81	78	43	41.1783	15	10	11	2.13631	1.19492e-10	4.94414e-09	up	yes	chrChr17:12354773-12359193:+	gi|571536625|ref|XP_003550924.2|	1232	5e-167	PREDICTED: calcineurin B-like protein 1-like isoform X1 [Glycine max]
Glyma.17G161700.Wm82.a2.v1	750	504	404	375.5	226	230	78	1.54496	2.11748e-07	4.85218e-06	up	yes	chrChr17:14112331-14114364:-	gi|356565499|ref|XP_003550977.1|	2189	0	PREDICTED: probable N-acetyltransferase HLS1-like [Glycine max]
Glyma.17G166300.Wm82.a2.v1	135	109	74	75.2106	48	42	33	1.35649	8.20878e-07	1.66246e-05	up	yes	chrChr17:15186756-15187712:-	gi|734391141|gb|KHN27062.1|	320	1e-33	hypothetical protein glysoja_028341 [Glycine soja]
Glyma.17G166900.Wm82.a2.v1	12	9	14	23.9532	45	30	39	-1.19521	0.000579644	0.00517068	down	yes	chrChr17:15254236-15258810:+	gi|356563570|ref|XP_003550034.1|	4851	0	PREDICTED: uncharacterized protein LOC100783437 [Glycine max]
Glyma.17G172900.Wm82.a2.v1	74	63	109	140.2	211	210	199	-1.07398	1.49755e-06	2.8688e-05	down	yes	chrChr17:17752933-17754945:+	gi|571537303|ref|XP_003550061.2|	1486	0	PREDICTED: uncharacterized protein LOC100798077 [Glycine max]
Glyma.17G173000.Wm82.a2.v1	181	142	185	110.82	67	50	20	1.76628	2.51415e-09	8.34057e-08	up	yes	chrChr17:17775297-17776803:-	gi|359806525|ref|NP_001241003.1|	1826	0	mitogen-activated protein kinase kinase kinase 2-like [Glycine max]
Glyma.17G178500.Wm82.a2.v1	7	20	43	44.0446	62	66	75	-1.02551	0.0049321	0.0295689	down	yes	chrChr17:19324290-19328714:-	gi|571537475|ref|XP_006601003.1|	1706	0	PREDICTED: two-component response regulator-like APRR2-like isoform X2 [Glycine max]
Glyma.17G180100.Wm82.a2.v1	915	1653	682	824.12	523	513	581	1.06654	1.51439e-05	0.000229058	up	yes	chrChr17:20207825-20213274:-	gi|571537529|ref|XP_006601011.1|	4177	0	PREDICTED: probable disease resistance protein At5g66900-like isoform X1 [Glycine max]
Glyma.17G195100.Wm82.a2.v1	341	357	363	276.32	225	151	198	1.00995	1.51393e-08	4.30854e-07	up	yes	chrChr17:30129894-30134871:-	gi|356565848|ref|XP_003551148.1|	2912	0	PREDICTED: D-arabinono-1,4-lactone oxidase-like [Glycine max]
Glyma.17G212200.Wm82.a2.v1	2	5	0	8.60127	11	28	8	-1.15705	0.00616698	0.035365	down	yes	chrChr17:35064075-35065120:-	gi|734406253|gb|KHN33896.1|	388	7e-43	14 kDa proline-rich protein DC2.15 [Glycine soja]
Glyma.17G215000.Wm82.a2.v1	39	41	13	20.5957	7	10	10	1.34674	0.000530045	0.00479103	up	yes	chrChr17:36082859-36083730:+	gi|356562076|ref|XP_003549300.1|	1041	2e-135	PREDICTED: probable receptor-like protein kinase At1g67000-like [Glycine max]
Glyma.17G215900.Wm82.a2.v1	52	32	38	71.9231	126	102	95	-1.10095	2.18323e-05	0.000317089	down	yes	chrChr17:36348788-36354117:+	gi|356563914|ref|XP_003550202.1|	2114	0	PREDICTED: probable receptor-like protein kinase At1g80640-like [Glycine max]
Glyma.17G216800.Wm82.a2.v1	218	256	213	163.907	93	124	58	1.35471	2.62051e-08	7.11471e-07	up	yes	chrChr17:36523435-36525004:-	gi|356562095|ref|XP_003549309.1|	1184	8e-157	PREDICTED: zinc finger protein 3-like [Glycine max]
Glyma.17G217000.Wm82.a2.v1	317	262	400	233.534	165	116	111	1.38863	1.44144e-10	5.89885e-09	up	yes	chrChr17:36553695-36556013:+	gi|571538613|ref|XP_003550206.2|	2057	0	PREDICTED: acidic mammalian chitinase-like [Glycine max]
Glyma.17G223400.Wm82.a2.v1	36	33	56	84.0429	145	152	100	-1.32466	7.80999e-07	1.58935e-05	down	yes	chrChr17:37658588-37659782:+	gi|734413713|gb|KHN37083.1|	851	1e-112	Early nodulin-like protein 1 [Glycine soja]
Glyma.17G226500.Wm82.a2.v1	227	211	141	140.137	73	119	52	1.24356	6.82711e-06	0.000112028	up	yes	chrChr17:38091013-38093234:-	gi|351725555|ref|NP_001235305.1|	817	4e-105	uncharacterized protein LOC100306711 [Glycine max]
Glyma.17G230600.Wm82.a2.v1	731	839	687	1221.39	1695	1726	1852	-1.02666	8.83142e-15	6.21507e-13	down	yes	chrChr17:38566124-38570491:+	gi|356562203|ref|XP_003549361.1|	1744	0	PREDICTED: probable protein phosphatase 2C 72-like [Glycine max]
Glyma.17G234900.Wm82.a2.v1	156	182	208	135.371	73	114	64	1.17544	1.0548e-06	2.09089e-05	up	yes	chrChr17:39008600-39011558:+	gi|351726162|ref|NP_001237373.1|	372	3e-41	uncharacterized protein LOC100527274 [Glycine max]
Glyma.17G235100.Wm82.a2.v1	1477	1411	1573	985.798	421	411	451	1.92364	2.11049e-51	7.71681e-49	up	yes	chrChr17:39018703-39025050:-	gi|356564123|ref|XP_003550306.1|	2072	0	PREDICTED: interferon-related developmental regulator 1-like isoform X1 [Glycine max]
Glyma.17G236200.Wm82.a2.v1	474	396	455	315.497	212	238	76	1.31138	3.55214e-06	6.20729e-05	up	yes	chrChr17:39123094-39124429:+	gi|351727090|ref|NP_001235613.1|	1030	4e-136	scof-1 protein [Glycine max]
Glyma.17G236700.Wm82.a2.v1	1664	2056	2213	1366.48	687	661	716	1.6432	7.76955e-30	1.38286e-27	up	yes	chrChr17:39189302-39193280:+	gi|356564133|ref|XP_003550311.1|	2040	0	PREDICTED: acyl-CoA-binding domain-containing protein 3 [Glycine max]
Glyma.17G238200.Wm82.a2.v1	30	46	73	141.711	216	320	202	-1.8718	1.80963e-11	8.73376e-10	down	yes	chrChr17:39357077-39359079:-	gi|356564147|ref|XP_003550318.1|	1723	0	PREDICTED: probable isoaspartyl peptidase/L-asparaginase 2-like [Glycine max]
Glyma.17G242200.Wm82.a2.v1	227	223	262	466.515	650	843	688	-1.38608	9.50972e-17	8.16065e-15	down	yes	chrChr17:39801530-39805888:+	gi|356564190|ref|XP_003550339.1|	2468	0	PREDICTED: abscisic acid 8'-hydroxylase 4 [Glycine max]
Glyma.17G242900.Wm82.a2.v1	2058	2115	1930	1153.82	151	178	180	3.64593	9.82402e-147	1.94394e-143	up	yes	chrChr17:39879023-39885071:-	gi|356562285|ref|XP_003549402.1|	2970	0	PREDICTED: nuclear elongation and deformation protein 1-like isoform X1 [Glycine max]
Glyma.17G245500.Wm82.a2.v1	952	953	647	625.683	390	411	328	1.2805	3.9556e-12	2.07533e-10	up	yes	chrChr17:40093382-40097206:+	gi|356564213|ref|XP_003550350.1|	4067	0	PREDICTED: probable disease resistance protein At4g33300-like [Glycine max]
Glyma.17G245600.Wm82.a2.v1	2414	2893	2495	2024.3	1425	1616	1126	1.03513	1.20879e-10	4.9954e-09	up	yes	chrChr17:40100134-40104081:+	gi|356564215|ref|XP_003550351.1|	4100	0	PREDICTED: probable disease resistance protein At4g33300-like [Glycine max]
Glyma.17G255100.Wm82.a2.v1	188	139	113	111.288	68	89	59	1.08084	1.63361e-05	0.000243803	up	yes	chrChr17:40923558-40925409:+	gi|571539688|ref|XP_003550408.2|	1516	0	PREDICTED: probable salt tolerance-like protein At1g75540-like [Glycine max]
Glyma.17G258400.Wm82.a2.v1	435	430	392	325.291	241	209	216	1.05235	4.19317e-12	2.18012e-10	up	yes	chrChr17:41248979-41254225:+	gi|571539820|ref|XP_006601353.1|	2786	0	PREDICTED: uncharacterized protein LOC100785193 isoform X1 [Glycine max]
Glyma.17G262300.Wm82.a2.v1	112	79	97	192.34	353	291	263	-1.39075	6.54985e-12	3.30827e-10	down	yes	chrChr17:41581753-41583367:-	gi|255644412|gb|ACU22711.1|	1675	0	unknown [Glycine max]
Glyma.18G002500.Wm82.a2.v1	285	305	306	186.618	62	70	53	2.31385	9.345e-34	1.89486e-31	up	yes	chrChr18:223235-224095:-	gi|359806264|ref|NP_001241215.1|	568	2e-70	uncharacterized protein LOC100793523 precursor [Glycine max]
Glyma.18G004200.Wm82.a2.v1	483	469	306	313.767	216	187	188	1.18746	2.75679e-09	9.08282e-08	up	yes	chrChr18:339443-345040:+	gi|356569736|ref|XP_003553052.1|	3161	0	PREDICTED: MACPF domain-containing protein At1g14780-like [Glycine max]
Glyma.18G005000.Wm82.a2.v1	320	274	384	245.657	125	234	110	1.10367	1.60039e-05	0.00024026	up	yes	chrChr18:388026-389034:-	gi|255632673|gb|ACU16688.1|	373	2e-41	unknown [Glycine max]
Glyma.18G006700.Wm82.a2.v1	2011	2089	2416	1620.64	1045	1016	971	1.24557	1.87027e-22	2.42911e-20	up	yes	chrChr18:493222-495254:-	gi|356566130|ref|XP_003551288.1|	1074	3e-143	PREDICTED: REF/SRPP-like protein At1g67360-like isoform 1 [Glycine max]
Glyma.18G007100.Wm82.a2.v1	7	4	7	13.0245	20	25	18	-1.09901	0.00530738	0.0313329	down	yes	chrChr18:514114-514936:+	gi|356569178|ref|XP_003552782.1|	672	1e-85	PREDICTED: dr1-associated corepressor homolog [Glycine max]
Glyma.18G008900.Wm82.a2.v1	580	707	650	380.228	81	88	83	2.98281	4.83526e-70	2.75684e-67	up	yes	chrChr18:645064-648182:-	gi|356566864|ref|XP_003551646.1|	666	9e-85	PREDICTED: uncharacterized protein LOC100815344 [Glycine max]
Glyma.18G009500.Wm82.a2.v1	38	48	52	78.4748	120	94	133	-1.04862	2.19491e-05	0.000318115	down	yes	chrChr18:682756-686119:-	gi|571542095|ref|XP_006601905.1|	3332	0	PREDICTED: kinase D-interacting substrate of 220 kDa-like [Glycine max]
Glyma.18G009800.Wm82.a2.v1	11	3	16	5.75299	2	0	1	1.24394	0.00282947	0.0188775	up	yes	chrChr18:702106-703575:+	gi|356567336|ref|XP_003551877.1|	472	2e-57	PREDICTED: uncharacterized protein LOC100500344 [Glycine max]
Glyma.18G010900.Wm82.a2.v1	0	2	2	5.56193	7	16	8	-1.11781	0.00781302	0.0425331	down	yes	chrChr18:768198-771155:-	gi|356567396|ref|XP_003551906.1|	1312	2e-179	PREDICTED: uncharacterized protein LOC100805014 [Glycine max]
Glyma.18G014700.Wm82.a2.v1	84	75	63	41.607	1	13	2	2.79783	6.75282e-14	4.36843e-12	up	yes	chrChr18:1021768-1022744:+	gi|351726762|ref|NP_001235090.1|	927	5e-123	uncharacterized protein LOC100306441 [Glycine max]
Glyma.18G018900.Wm82.a2.v1	837	2013	1751	3259.48	4703	4108	6871	-1.43427	2.46057e-08	6.72389e-07	down	yes	chrChr18:1392433-1399620:+	gi|571541774|ref|XP_006601860.1|	3408	0	PREDICTED: early nodulin-70 isoform X1 [Glycine max]
Glyma.18G020000.Wm82.a2.v1	137	121	111	215.398	339	297	327	-1.15765	2.93249e-11	1.36819e-09	down	yes	chrChr18:1474107-1477142:-	gi|734400174|gb|KHN31260.1|	1303	8e-178	rRNA 2'-O-methyltransferase fibrillarin 2 [Glycine soja]
Glyma.18G020600.Wm82.a2.v1	210	215	206	139.122	95	68	17	1.60507	1.28153e-06	2.49043e-05	up	yes	chrChr18:1504194-1504759:-	gi|356567838|ref|XP_003552122.1|	330	1e-36	PREDICTED: uncharacterized protein LOC100792830 [Glycine max]
Glyma.18G025500.Wm82.a2.v1	2823	2871	2742	1584.07	229	204	202	3.8124	2.32484e-196	8.68947e-193	up	yes	chrChr18:1879117-1887759:+	gi|356568154|ref|XP_003552278.1|	4065	0	PREDICTED: uncharacterized protein LOC100788781 isoform X1 [Glycine max]
Glyma.18G029300.Wm82.a2.v1	788	1124	1094	658.163	177	440	208	1.80138	1.67582e-11	8.14636e-10	up	yes	chrChr18:2221206-2223309:+	gi|356568543|ref|XP_003552470.1|	2211	0	PREDICTED: nematode resistance protein-like HSPRO2-like [Glycine max]
Glyma.18G030700.Wm82.a2.v1	160	222	390	621.271	1247	968	895	-1.65738	4.20616e-11	1.88655e-09	down	yes	chrChr18:2355461-2359061:-	gi|356568718|ref|XP_003552557.1|	2669	0	PREDICTED: endoglucanase 1 [Glycine max]
Glyma.18G036500.Wm82.a2.v1	409	275	233	196.266	122	59	42	1.89503	1.78371e-10	7.16017e-09	up	yes	chrChr18:2862469-2865099:-	gi|571542837|ref|XP_003552868.2|	3144	0	PREDICTED: L-type lectin-domain containing receptor kinase S.4-like isoform X1 [Glycine max]
Glyma.18G042100.Wm82.a2.v1	208	232	86	117.703	70	60	31	1.55458	1.11596e-06	2.20562e-05	up	yes	chrChr18:3553145-3554976:-	gi|734338418|gb|KHN08793.1|	2172	0	U-box domain-containing protein 21 [Glycine soja]
Glyma.18G044200.Wm82.a2.v1	97	81	41	50.374	49	14	13	1.25354	0.000751474	0.00640781	up	yes	chrChr18:3813589-3817289:-	gi|356569746|ref|XP_003553057.1|	1602	0	PREDICTED: protein LHY [Glycine max]
Glyma.18G045200.Wm82.a2.v1	1224	1447	1066	771.863	133	427	168	1.79161	2.7372e-06	4.93444e-05	up	yes	chrChr18:3917171-3918848:-	gi|351722478|ref|NP_001238525.1|	697	3e-87	uncharacterized protein LOC100306161 [Glycine max]
Glyma.18G048400.Wm82.a2.v1	15	21	9	29.4639	56	50	32	-1.1303	0.00113155	0.00896049	down	yes	chrChr18:4179082-4180051:-	gi|356569953|ref|XP_003553158.1|	768	1e-100	PREDICTED: deoxyuridine 5'-triphosphate nucleotidohydrolase-like [Glycine max]
Glyma.18G050200.Wm82.a2.v1	193	250	196	165.59	101	112	127	1.01763	2.81466e-07	6.32628e-06	up	yes	chrChr18:4332197-4334025:+	gi|356569999|ref|XP_003553180.1|	1325	5e-178	PREDICTED: uncharacterized protein LOC100818023 [Glycine max]
Glyma.18G054600.Wm82.a2.v1	192	315	311	206.108	123	149	126	1.12139	3.06839e-07	6.83107e-06	up	yes	chrChr18:4749616-4752421:+	gi|356569471|ref|XP_003552924.1|	2009	0	PREDICTED: CBL-interacting serine/threonine-protein kinase 11-like [Glycine max]
Glyma.18G056400.Wm82.a2.v1	16	18	28	37.5738	80	52	39	-1.04146	0.00171579	0.0125527	down	yes	chrChr18:4943904-4944856:+	gi|571543402|ref|XP_006602069.1|	825	3e-108	PREDICTED: uncharacterized protein LOC102664858 [Glycine max]
Glyma.18G061100.Wm82.a2.v1	18731	17573	17951	14099.6	9427	11587	8070	1.0343	1.19601e-11	5.88193e-10	up	yes	chrChr18:5539339-5544439:+	gi|571543515|ref|XP_006602084.1|	3054	0	PREDICTED: asparagine synthetase [glutamine-hydrolyzing] 2 isoform X1 [Glycine max]
Glyma.18G064000.Wm82.a2.v1	983	1015	857	632.737	319	256	259	1.8831	2.17751e-35	4.63603e-33	up	yes	chrChr18:5847976-5851846:-	gi|356566126|ref|XP_003551286.1|	2586	0	PREDICTED: non-specific phospholipase C1-like [Glycine max]
Glyma.18G071400.Wm82.a2.v1	32	20	29	63.0108	111	102	99	-1.57651	2.31738e-09	7.75664e-08	down	yes	chrChr18:6692356-6694284:-	gi|356566275|ref|XP_003551359.1|	923	3e-119	PREDICTED: uncharacterized protein LOC100813747 [Glycine max]
Glyma.18G072700.Wm82.a2.v1	120	131	117	206.549	277	279	351	-1.07402	5.04221e-09	1.56905e-07	down	yes	chrChr18:6857688-6859994:-	gi|356566309|ref|XP_003551375.1|	1080	1e-144	PREDICTED: RNA-binding protein pno1-like [Glycine max]
Glyma.18G072800.Wm82.a2.v1	2259	2018	1956	1347.71	517	464	621	2.06298	3.59312e-43	9.98918e-41	up	yes	chrChr18:6873417-6878947:-	gi|356566311|ref|XP_003551376.1|	1760	0	PREDICTED: BTB/POZ domain-containing protein At1g55760-like [Glycine max]
Glyma.18G082000.Wm82.a2.v1	21	25	31	49.1072	99	60	69	-1.19337	5.17092e-05	0.000676564	down	yes	chrChr18:7958914-7965569:+	gi|571544108|ref|XP_006602163.1|	5278	0	PREDICTED: kinesin-like protein KIN12B-like [Glycine max]
Glyma.18G082200.Wm82.a2.v1	243	282	235	195.275	150	134	110	1.06165	1.50364e-08	4.28652e-07	up	yes	chrChr18:7996830-8000219:-	gi|571572471|ref|XP_003557063.2|	3692	0	PREDICTED: disease resistance protein RPM1-like [Glycine max]
Glyma.18G083200.Wm82.a2.v1	8	16	10	6.60879	0	4	0	1.26936	0.00250054	0.0170482	up	yes	chrChr18:8188682-8192311:-	gi|356566658|ref|XP_003551547.1|	4728	0	PREDICTED: disease resistance protein RPM1-like [Glycine max]
Glyma.18G086600.Wm82.a2.v1	511	714	499	447.01	326	307	287	1.0279	5.97669e-09	1.83273e-07	up	yes	chrChr18:8602778-8606540:+	gi|356566971|ref|XP_003551698.1|	4672	0	PREDICTED: disease resistance protein RPM1-like [Glycine max]
Glyma.18G086900.Wm82.a2.v1	87	83	62	59.4278	42	34	43	1.01156	0.000122009	0.00140992	up	yes	chrChr18:8623297-8626961:+	gi|356566971|ref|XP_003551698.1|	4107	0	PREDICTED: disease resistance protein RPM1-like [Glycine max]
[truncated: 292 more rows]

## Sheet: Table  S3
Accession No.	Name/description	Log2 (LP/HP)	Q value
Glyma.11G170300	Asparagine synthetase	1.52619	4.88512e-25
[truncated: 17 more rows]

## Sheet: Table S4
Accession No.	Name/description	Log2 (LP/HP)	Q value
[truncated: 50 more rows]

[truncated: 2 more sheets: Table S5, Table S6]
